# Supplementary material for: The SET Domain Protein, Set3p, Promotes the Reliable Execution of Cytokinesis in Schizosaccharomyces pombe
Source: PLoS One. 2012 Feb 8;7(2):e31224. doi: 10.1371/journal.pone.0031224 (PMC3275627; doi:10.1371/journal.pone.0031224)
Supplement: File S1 — (XLSX) [file pone.0031224.s005.xlsx]

## Sheet: All Genes
Probe Set ID	[set3D, DMSO]	[set3D, LatA]	[Wild Type, DMSO]	[Wild type, LatA]	Target Description
1775871_at	-0.0335588	0.03263	-0.380225	0.111431	S. pombe SPCC777.13 /GEN=vps35 /DEF=retromer complex (predicted)
1774187_at	-0.639498	0.792613	-1.13686	0.325867	S. pombe SPAC15A10.05c /DEF=conserved protein (broad species distribution)
1772102_at	-0.021939	0.0710529	-0.219872	0.0212221	S. pombe SPBC21D10.12 /GEN=hob1 /DEF=amphiphysin homolog
1779184_at	-0.0864029	-0.22603	0.231506	0.0876662	S. pombe SPAPB1A10.04c /GEN=cwp1 /DEF=geranylgeranyltransferase (alpha subunit) (PMID 9781874)
1779821_at	0.118409	-0.368045	0.127058	-0.19853	S. pombe SPAC694.06c /GEN=mrc1 /DEF=involved in DNA replication checkpoint (PMID 11715016)
1775938_at	1.32317	-0.230267	0.031052	-0.111083	S. pombe SPBC1683.09c /GEN=frp1 /DEF=ferric-chelate reductase activity (PMID 8321236)
1770060_at	0.245047	-0.0814546	0.278809	-0.316687	S. pombe SPAC17A2.01 /GEN=car1 /DEF=MFS efflux transporter (PMID 8246883)
1770678_at	-0.833157	0.46569	-1.4816	0.468244	S. pombe SPAC2E1P3.01 /DEF=zinc binding dehydrogenase
1780143_at	-0.127748	0.00789134	0.00605075	0.0129639	S. pombe SPCC14G10.01 /DEF=dephospho-CoA kinase activity (ISS)
1777202_at	-0.0416918	0.00626723	0.0634178	0.041743	S. pombe SPAC11D3.10 /DEF=nifs homolog
1774302_at	0.0269677	-0.0876958	-0.0115458	-0.312652	S. pombe SPAC1782.09c /GEN=clp1 /DEF=Cdc14-related protein phosphatase
1771478_at	0.1059	-0.0167201	-0.151218	-0.0183665	S. pombe SPBC1E8.05 /DEF=glycoprotein (predicted)
1772673_at	-0.174709	0.234733	-0.3034	0.0153522	S. pombe SPBC14F5.10c /DEF=zinc finger protein
1769917_at	0.0855834	0.128155	-0.496907	-0.131202	S. pombe SPBC4F6.10 /GEN=vps901 /DEF=guanyl-nucleotide exchange factor activity (predicted)
1778572_at	-0.0700537	0.0449613	-0.149624	0.120084	S. pombe SPAC1093.06c /GEN=dhc1 /DEF=dynein heavy chain (PMID 10855500)
1773323_at	-0.0649967	-0.122628	0.0751537	0.0937087	S. pombe SPAC1687.12c /GEN=coq4 /DEF=involved in ubiquinone biosynthesis
1776462_at	0.0488354	-0.441964	0.437324	0.127381	S. pombe SPAC139.02c /DEF=oxaloacetate transporter (predicted)
1778083_at	0.0955493	-0.016757	0.13449	-0.424464	S. pombe SPAC25H1.08c /DEF=WD repeat protein
1773794_at	-0.385559	0.0263421	0.0639712	0.343994	S. pombe SPCC757.13 /DEF=localization membrane (predicted)
1773068_at	0.214776	-0.148847	0.313156	-0.229729	S. pombe SPAC16E8.15 /GEN=tif45 /DEF=translation initiation factor
1773334_at	0.0833953	-0.0878607	0.317777	-0.116812	S. pombe SPBP35G2.04c /DEF=sequence orphan
1774210_at	0.0676003	-0.0654936	-0.0247634	-0.040486	S. pombe SPAC3F10.15c /GEN=spo12 /DEF=involved in sporulation (predicted)
1778900_at	0.246929	-0.103564	0.741425	-0.1165	S. pombe SPBC1289.07c /GEN=rpc40 /DEF=DNA-directed RNA polymerase (I and III subunit) (predicted)
1776486_at	0.0098877	-0.00547155	0.0939201	-0.0470314	S. pombe SPBC8D2.02c /DEF=conserved fungal protein
1776169_at	0.0290991	-0.0255562	0.0509523	-0.113216	S. pombe SPAC30D11.14c /DEF=KH domain
1770454_at	0.0985336	-0.112856	0.166565	-0.09023	S. pombe SPAC2F3.04c /GEN=rim1 /DEF=single-stranded DNA binding protein
1773746_at	-0.0357364	0.0821756	0.0163552	-0.0292397	S. pombe SPBC1703.15c /GEN=vps33 /DEF=sec1 family
1776971_at	0.130584	0.168157	-0.21455	-0.30164	S. pombe SPAC57A10.02 /GEN=cdr2 /DEF=serinethreonine protein kinase
1776696_at	-0.0518322	0.105792	-0.173769	0.0247339	S. pombe SPBC3B9.02c /GEN=cwf28 /DEF=G-patch domain
1775961_at	-0.1421	0.117867	-0.313459	0.0725908	S. pombe SPAC1635.01 /DEF=voltage-dependent anion-selective channel
1774183_at	-0.0784788	-0.266749	0.288179	0.0950317	S. pombe SPACUNK4.11c /DEF=hypothetical protein
1773033_at	0.0388196	-0.0245396	0.0741498	-0.0423031	S. pombe SPAC144.11 /GEN=rps1102 /DEF=40S ribosomal protein S11
1769790_at	0.350777	-0.756361	0.120159	-0.723281	S. pombe SPCC290.04 /GEN=ams2 /DEF=expressed during cell cycle (PMID 12535531)
1769873_s_at	-0.273168	0.00698408	-0.0235577	0.258108	S. pombe SPAC167.08 /GEN=Tf2-2 /DEF=retrotransposable element
1772685_at	-0.0522928	0.107334	-0.241462	-0.0108245	S. pombe SPBC646.16 /DEF=20S proteasome component (alpha 1)
1772221_at	-0.721708	0.745646	-1.85876	0.073376	S. pombe SPCPB16A4.06c /DEF=dubious
1773246_at	-0.031916	0.0472434	0.037267	-0.111686	S. pombe SPCC16C4.18c /GEN=taf50 /DEF=transcription initiation factor activity
1778635_at	-0.212896	0.107563	-0.104032	0.243892	S. pombe SPBC21.07c /DEF=serinethreonine protein kinase (predicted)
1777132_at	-0.012778	-0.0578839	0.0557528	-0.0905711	S. pombe SPAC21E11.05c /GEN=cyp8 /DEF=cyclophilin
1779011_at	-0.0447989	0.0967801	-0.143819	0.103858	S. pombe SPCC24B10.19c /DEF=sequence orphan
1780195_at	-0.320919	0.260403	-0.0909449	0.815535	S. pombe SPAC1F7.10 /DEF=hydantoin racemase (predicted)
1773592_at	-0.0136172	0.414808	-0.607525	-0.0439631	S. pombe SPBC4F6.16c /DEF=oxidoreductase
1773466_at	0.0502205	-0.0207535	0.0670039	-0.0269343	S. pombe SPBC2F12.04 /GEN=rpl1701 /DEF=60S ribosomal protein L17
1777488_at	0.127293	-0.122814	0.54105	-0.0882696	S. pombe SPBC17D1.02 /DEF=involved in peptidyl-diphthamide biosynthesis from peptidyl-histidine (predicted)
1774904_at	-0.140125	0.124669	-0.447585	0.0562572	S. pombe SPAC57A7.08 /GEN=pzh1 /DEF=serinethreonine protein phosphatase
1776747_at	-0.103585	0.128818	0.0645615	-0.112238	S. pombe SPAPB17E12.10c /DEF=SAM-dependent methyltransferase (predicted)
1774528_at	-0.0135393	-0.0451921	0.0582364	0.00764656	S. pombe SPAC17H9.13c /DEF=glutamate 5-kinase (predicted)
1779456_at	0.0746409	-0.0890503	0.10684	-0.0967201	S. pombe SPBPB21E7.10 /DEF=sequence orphan
1778602_at	-0.529983	0.595392	-1.35563	0.192717	S. pombe SPAC3C7.05c /DEF=glycosyl hydrolase family 76
1769465_at	-0.0137002	-0.029761	0.0916567	-0.0157747	S. pombe SPAC1002.07c /GEN=ats1 /DEF=N-acetyltransferase (predicted)
1777865_at	0.0780675	-0.199002	0.0247199	-0.0280717	S. pombe SPAC1B1.01 /GEN=rdp1 /DEF=transcription factor
1769309_at	0.0779467	-0.357995	0.109564	-0.112476	S. pombe SPBC1105.11c /GEN=h3.3 /DEF=histone H3
1772553_at	-0.0298303	-0.0813265	0.0217371	0.105999	S. pombe SPAC29B12.04 /GEN=snz1 /DEF=involved in pyridoxine metabolism (predicted)
1771207_at	0.014952	-0.0458597	-0.0336103	0.0778685	S. pombe SPAC23H3.05c /GEN=swd1 /DEF=SET1 complex (TAP) (PMID 12488447)
1775223_at	-0.157175	0.0982529	-0.00616741	0.0425313	S. pombe SPCC1393.05 /DEF=sequence orphan
1772494_at	-0.0187594	0.216661	-0.189199	0.0276578	S. pombe SPCC794.12c /GEN=mae2 /DEF=malic enzyme
1772937_at	0.224012	-0.0921952	0.358956	-0.101655	S. pombe SPCC1259.04 /DEF=sequence orphan
1775597_at	-0.0027024	-0.0133006	0.0402883	0.00073115	S. pombe SPBC776.03 /DEF=homoserine dehydrogenase (predicted)
1773851_at	0.0548239	0.217535	-0.0688626	-0.0770798	S. pombe SPBC17D11.01 /DEF=peptidase family C48
1771572_at	0.0828012	-0.0191568	-0.0361767	-0.0401796	S. pombe SPAC589.12 /DEF=hypothetical protein
1769415_at	-0.0459716	-0.307125	0.0680472	0.0638847	S. pombe SPBC146.02 /DEF=sequence orphan
1769517_at	0.137661	0.0868861	-0.12481	-0.0128762	S. pombe SPAC9E9.07c /GEN=ypt2 /DEF=GTPase (PMID 2328721)
1770804_at	0.0202723	-0.189826	0.322504	-0.186523	S. pombe SPBC685.08 /DEF=hypothetical protein
1769744_at	-0.0715119	0.174951	-0.0131928	-0.0580556	S. pombe SPAC9G1.06c /GEN=cyk3 /DEF=src (SH3) homology domain
1773849_at	0.298762	-0.0415688	-0.486603	0.037151	S. pombe SPAPB2B4.04c /DEF=P-type calcium ATPase (PMID 12707717)
1771254_at	0.0163749	-0.066452	0.0117893	0.00360711	S. pombe SPBC1921.01c /GEN=rpl3701 /DEF=60S ribosomal protein L37
1774185_at	-0.890039	0.597701	-0.613416	1.63525	S. pombe SPCC1739.08c /DEF=short chain dehydrogenase
1771471_at	0.0314627	0.00389481	-0.131417	0.0257546	S. pombe SPCC965.03 /GEN=vma8 /DEF=vacuolar ATP synthase (subunit D) (predicted)
1778007_at	0.135168	-0.176797	0.451532	-0.133918	S. pombe SPAC26F1.12c /DEF=conserved eukaryotic protein
1774048_at	0.0273422	-0.0217536	0.0420958	-0.0218967	S. pombe SPBP22H7.08 /GEN=rps1002 /DEF=40S ribosomal protein S10
1769996_at	0.00722408	-0.0388193	0.0233987	-0.0228399	S. pombe SPBC776.11 /GEN=rpl2801 /DEF=60S ribosomal protein Ll28B 27a
1776383_at	0.0465838	-0.206614	0.267985	-0.0405318	S. pombe SPAC27E2.10c /GEN=rfc3 /DEF=AAA family ATPase
1769545_at	0.430194	-0.0956764	0.367572	-0.230831	S. pombe SPBC16D10.06 /DEF=ZIP zinc transporter domain
1771882_at	0.0604261	-0.0307773	0.105615	-0.0729701	S. pombe SPBC1683.10c /DEF=DUF125
1775214_at	0.0559635	-0.0936871	0.0845947	-0.0577329	S. pombe SPBC215.02 /GEN=bob1 /DEF=prefoldin (subunit 5)
1777090_at	-0.139812	-0.088472	0.0823914	-0.00741132	S. pombe SPBC30D10.08 /GEN=mgm101 /DEF=mitochondrial nucleoid protein
1770633_at	-0.112181	-0.0160837	0.0912584	-0.025382	S. pombe SPBC17D1.07c /DEF=calcium binding protein
1769965_at	0.21786	-0.203681	0.343473	-0.176148	S. pombe SPAC17C9.15c /DEF=dubious
1779798_at	0.146145	-0.108671	0.259911	-0.322784	S. pombe SPBC1778.09 /DEF=TBC domain protein
1769425_at	0.119795	0.0590782	0.0126705	-0.0587311	S. pombe SPAC19E9.02 /GEN=fin1 /DEF=serinethreonine protein kinase
1774635_at	-0.0213747	-0.0216986	0.0212374	-0.0010163	S. pombe SPCC1682.05c /DEF=TPR repeat protein
1778421_at	0.200312	-0.0642096	0.684893	-0.148856	S. pombe SPAC31A2.07c /DEF=DEADDEAH box helicase
1772038_at	0.19616	-0.0696538	0.627603	-0.1462	S. pombe SPAC823.04 /DEF=conserved eukaryotic protein
1769458_at	-0.0720437	-0.0706768	-0.0192286	0.094595	S. pombe SPBC27.02c /DEF=DASH complex (predicted)
1777934_at	-0.26136	0.181932	-0.275059	0.159588	S. pombe SPBC776.15c /DEF=dihydrolipoamide S-succinyltransferase (e2 component of oxoglutarate dehydrogenase complex) (predicted)
1770195_at	-0.185306	0.0307916	0.0194216	0.259783	S. pombe SPBC23E6.03c /DEF=protein N-terminal amidase (predicted)
1777622_at	-0.115793	0.165397	-0.549965	0.0765365	S. pombe SPAC4G8.05 /DEF=serinethreonine protein kinase (predicted)
1777144_at	0.0804005	-0.167212	0.0257219	0.0024786	S. pombe SPAC23H4.13c /DEF=dubious
1780173_at	0.190149	-0.338741	0.801392	-0.0165637	S. pombe SPAC31A2.02 /DEF=DUF343
1773402_at	-0.0396843	0.0987593	-0.0122693	0.0498803	S. pombe SPAC26H5.12 /DEF=DNA-directed RNA polymerase (predicted)
1780132_at	0.0785723	-0.129432	0.243074	0.00830046	S. pombe SPBC18E5.13 /DEF=translation initiation factor (predicted)
1777719_at	-0.026158	0.0530558	-0.204973	0.0409663	S. pombe SPBC21B10.03c /DEF=involved in polyadenylation (predicted)
1771352_at	0.0730044	0.0351467	-0.0429757	-0.135748	S. pombe SPAC2F7.08c /DEF=chromatin remodeling complex (predicted)
1772318_at	0.0782312	-0.161145	0.194149	-0.0140095	S. pombe SPAC18B11.08c /DEF=conserved yeast protein
1776505_at	0.00647132	0.0115798	-0.0874898	0.0422366	S. pombe SPAC222.11 /DEF=coproporphyrinogen III oxidase (predicted)
1772140_at	0.03414	0.0756232	-0.05325	0.0512622	S. pombe SPAC227.11c /DEF=glycoprotein (predicted) (PMID 12077121)
1778013_at	-0.0308819	-0.107493	0.348852	-0.160053	S. pombe SPAC2F3.13c /DEF=tRNA-ribosyltransferase (predicted)
1774654_at	0.334195	-0.264154	0.592889	-0.357512	S. pombe SPBC13A2.03 /DEF=phosphatidate cytidylyltransferase (predicted)
1776740_at	-0.128724	0.0497665	-0.291794	0.202059	S. pombe SPAC57A10.08c /DEF=esteraselipase (predicted)
1777666_at	-0.0729332	-0.14991	0.161702	0.00334644	S. pombe SPBC115.03 /DEF=oxidoreductase (predicted)
1779828_at	-0.137302	0.182114	-0.252749	0.306983	S. pombe SPAC1D4.11c /GEN=lkh1 /DEF=dual specificity protein kinase
1772309_at	0.315141	-0.181866	0.726844	-0.318813	S. pombe SPBC2G2.08 /GEN=ade9 /DEF=C-1-tetrahydrofolate synthase (predicted)
1779043_at	0.123271	-0.0523904	0.0508877	0.0943693	S. pombe SPAC13A11.06 /DEF=pyruvate decarboxylase (predicted)
1771242_at	0.266081	0.596198	0.0301444	-0.34886	S. pombe SPAC2H10.01 /DEF=involved in transcriptional regulation
1778964_at	0.0530154	0.0844358	-0.14802	-0.0633497	S. pombe SPAC3A12.15 /GEN=vps53 /DEF=involved in intracellular protein transport (predicted)
1774753_at	-0.0448462	0.183209	-0.152033	0.0301517	S. pombe SPBC3E7.05c /DEF=conserved eukaryotic protein
1771667_at	-0.0424719	0.0465581	-0.819855	0.0652749	S. pombe SPAC823.03 /DEF=serinethreonine protein kinase (predicted)
1775385_at	-0.109027	0.185337	-0.195226	0.0976702	S. pombe SPCC16C4.17 /DEF=sequence orphan
1772213_at	0.142574	-0.242426	0.106043	-0.131426	S. pombe SPAC110.02 /GEN=pds5 /DEF=cohesin-associated protein (PMID 11598020)
1774920_at	0.125625	-0.0563107	-0.620328	0.118917	S. pombe SPBC1198.07c /DEF=glycosylhydrolase (predicted)
1778136_at	0.13344	-0.0590423	-0.0423358	-0.135729	S. pombe SPCC4B3.15 /GEN=dmf1 /DEF=involved in cytokinesis (required)
1772082_at	-0.172508	0.371474	-0.363689	0.152016	S. pombe SPBC29A3.03c /DEF=zinc finger protein
1773005_at	-0.0941324	0.203222	-0.250643	0.0662524	S. pombe SPAC17C9.01c /GEN=nuc2 /DEF=anaphase-promoting complex (APC) (PMID 12477395)
1770881_at	-0.00377305	0.0716	-0.014581	-0.145003	S. pombe SPBC800.05c /GEN=tub1 /DEF=tubulin (alpha 2)
1778429_at	-0.299251	0.127783	-0.460714	0.0406844	S. pombe SPBC21C3.11 /DEF=UBX domain
1771891_at	-0.0470476	-0.00624053	-0.0364014	0.0934226	S. pombe SPBC27B12.03c /DEF=lathosterol oxidase (ISS)
1772862_s_at	-0.0883665	-0.678238	0.257263	1.50298	S. pombe SPAC750.04c /DEF=B44484
1776962_at	-0.0101608	-0.064016	0.0580972	-0.105164	S. pombe SPBC660.10 /DEF=involved in translational elongation (factor g)
1773326_at	0.296372	-0.102987	0.489411	-0.387143	S. pombe SPAC1B3.13 /DEF=WD repeat protein
1776292_at	-0.0614154	-0.165427	0.106909	0.00653712	S. pombe SPAC31G5.16c /GEN=dpm1 /DEF=dolichol-phosphate mannosyltransferase (catalytic subunit)
1769404_at	-0.0555404	0.260053	-0.209195	0.0440795	S. pombe SPCC622.02 /DEF=dubious
1778667_at	0.146964	-0.10205	0.426731	-0.0717255	S. pombe SPBC1347.13c /DEF=ribose methyltransferase (predicted)
1770959_at	0.0496028	-0.0763944	0.0568431	-0.0713514	S. pombe SPAC12G12.01c /DEF=WD repeat protein
1771607_at	-0.0294663	0.0104774	-0.0262566	0.0214554	S. pombe SPAC17H9.03c /DEF=sequence orphan
1779930_at	-0.0181163	-0.0630185	0.0108143	0.0756254	S. pombe SPAC1F12.07 /DEF=phosphoserine aminotransferase (predicted)
1776131_at	-0.070125	0.0912263	-0.202464	0.0721455	S. pombe SPBC29A3.10c /GEN=atp14 /DEF=F1-ATPase subunit H (predicted)
1778068_at	-0.832878	0.229288	-2.87367	0.0770505	S. pombe SPBC56F2.06 /DEF=hypothetical protein
1769389_at	0.0713704	0.0442813	0.0451886	-0.0794268	S. pombe SPBC17A3.05c /DEF=DNAJ domain protein
1772153_at	0.0245158	0.010328	0.0505835	-0.130895	S. pombe SPAC23C4.19 /GEN=spt5 /DEF=involved in transcriptional regulation
1777167_at	0.045564	0.315253	-0.192028	-0.0760956	S. pombe SPBC1718.07c /GEN=zfs1 /DEF=zinc finger protein
1770097_at	-0.136131	-0.0276241	-0.293525	0.240394	S. pombe SPCC1020.05 /DEF=calcineurin-like phosphoesterase
1779392_at	0.0509768	-0.0331147	0.109007	-0.187005	S. pombe SPAC227.01c /DEF=involved in protein-ER retention (predicted)
1778466_at	-0.0282962	0.109988	-0.0450335	0.007267	S. pombe SPAP8A3.09c /GEN=paa1 /DEF=protein phosphotase regulatory subunit
1775059_at	0.0606435	-0.0240997	0.111979	-0.0689491	S. pombe SPAC1783.08c /GEN=rpl1502 /DEF=60S ribosomal protein L15b
1776202_at	-0.519167	0.177173	0.078133	0.351013	S. pombe SPCC1393.10 /GEN=ctr4 /DEF=copper transporter (high affinity) (PMID 11274192)
1774291_at	-0.229315	0.105379	-0.218041	0.274837	S. pombe SPBC354.15 /DEF=fructosyl amino acid oxidase (predicted)
1774189_at	0.0107009	-0.0144459	0.00885073	-0.0186068	S. pombe SPCC24B10.09 /GEN=rps1702 /DEF=40S ribosomal protein S17
1771082_at	0.126824	0.0226065	-0.0982332	-0.0194699	S. pombe SPAC27F1.07 /DEF=dolichyl-diphospho-oligosaccharide-protein glycosyltransferase activity (predicted)
1779252_at	0.046759	-0.0461893	0.155122	0.0138502	S. pombe SPBC1677.03c /DEF=threonine dehydratase (predicted)
1775772_at	-0.00219663	-0.0252816	-0.0535812	0.278619	S. pombe SPAC323.07c /DEF=MatE family transporter
1769581_at	0.0477826	0.0590057	-0.0584529	-0.102094	S. pombe SPBC1604.15 /DEF=GPI-anchor transamidase activity
1775716_at	-0.142111	0.0310211	-0.142561	0.115607	S. pombe SPAC11G7.05c /DEF=malonyl coa-acyl carrier protein transacylase (predicted)
1779419_at	0.125828	-0.136206	0.237866	-0.125452	S. pombe SPBC17A3.01c /GEN=tim50 /DEF=TIM23 translocase complex
1774823_s_at	-0.0585445	0.541145	-0.169505	0.035601	S. pombe SPAC212.09c /DEF=pseudo-malic enzyme with 2 frameshifts
1772152_at	-0.0976303	-0.196751	0.0944916	-0.213977	S. pombe SPAC17A5.18c /DEF=sequence orphan
1778009_at	0.0887725	-0.0187035	0.0419162	-0.132085	S. pombe SPCC1795.08c /DEF=Myb family
1777837_at	0.208662	-0.0597436	0.541438	-0.232161	S. pombe SPAC3F10.16c /DEF=GTPase activity (predicted)
1772173_at	0.130764	0.0222483	0.0435998	-0.19072	S. pombe SPAC926.06c /DEF=conserved eukaryotic protein
1769861_at	0.0992037	0.0217457	0.00927893	-0.108435	S. pombe SPCC24B10.08c /DEF=histone acetyltransferase complex (predicted)
1772462_at	0.0773735	-0.00226434	0.203745	-0.184492	S. pombe SPCC622.14 /DEF=GTPase activating protein (predicted)
1770588_at	0.0496728	0.138637	0.0926183	-0.174294	S. pombe SPCC613.12c /DEF=WD repeat protein
1770722_at	-0.0581191	-0.0325305	0.00732104	-0.0796639	S. pombe SPAC959.04c /DEF=mannosyltransferase (predicted)
1772927_at	-0.0312122	-0.0772251	0.0808614	0.00132815	S. pombe SPCC11E10.07c /DEF=translation initiation factor
1780175_at	-0.126077	-0.0213811	0.314574	0.026303	S. pombe SPCC4B3.18 /DEF=flavoprotein (predicted)
1773095_at	0.288328	-0.11234	0.653143	-0.154084	S. pombe SPAC8F11.04 /DEF=hypothetical protein
1775826_s_at	-0.0192971	-0.295743	0.199089	-0.0087533	S. pombe SPBC1348.09 /DEF=short chain dehydrogenase (predicted)
1773874_at	-0.0625957	0.0568978	-0.32475	0.0454715	S. pombe SPAC32A11.03c /DEF=homeobox domain
1773442_at	0.0322968	0.10116	-0.0345701	-0.154711	S. pombe SPAC17A2.12 /DEF=zinc finger protein
1773004_at	-0.0988518	0.1392	-0.243757	0.088823	S. pombe SPBC29A10.13 /GEN=atp7 /DEF=F0-ATPase subunit D
1773499_at	0.16706	-0.0722431	0.46036	-0.337305	S. pombe SPAC20H4.08 /DEF=hypothetical protein
1776056_at	-0.0833069	0.23543	-0.376208	0.0472031	S. pombe SPAC3A11.12c /GEN=rpt5 /DEF=19S proteasome regulatory subunit
1772441_at	0.0325699	-0.0480658	0.0699304	-0.023044	S. pombe SPBC14C8.10 /GEN=mrpl24 /DEF=mitochondrial ribosomal protein subunit YmL14YmL24
1779557_at	-0.0015831	-0.169065	0.0795142	0.00656255	S. pombe SPBC12C2.07c /DEF=spermidine synthase (predicted)
1773368_at	0.268013	-0.108285	1.00491	-0.036719	S. pombe SPCC16C4.08c /GEN=skb15 /DEF=interacts physically with Shk1p (PMID 11389855)
1778965_at	0.0433579	-0.0267115	0.144219	-0.189651	S. pombe SPCC338.07c /DEF=N-acetyltransferase complex (predicted)
1777716_at	-0.309738	0.118596	-1.61488	0.0256303	S. pombe SPAC637.03 /DEF=hypothetical protein
1775400_at	-0.0707041	0.15998	-0.570335	0.055673	S. pombe SPBC31E1.04 /GEN=pep12 /DEF=SNARE (predicted)
1771808_at	0.0134058	-0.0252886	-0.00512854	-0.0647202	S. pombe SPBC2D10.08c /DEF=mitochondrial ribosomal protein subunit yml6
1771622_at	-0.00918897	0.0913629	-0.171725	-0.0129884	S. pombe SPBC83.17 /DEF=transcription factor
1776236_at	-0.0829452	0.266912	-0.397889	0.0762218	S. pombe SPAC24H6.09 /GEN=gef1 /DEF=RhoGEF
1777893_at	-0.0780557	0.292503	-0.242136	0.0335547	S. pombe SPAC4H3.02c /DEF=sequence orphan
1770018_at	-0.0341791	0.0403541	-0.119843	0.0132653	S. pombe SPAC222.12c /GEN=atp2 /DEF=F1-ATPase beta subunit (PMID 6228552)
1774068_at	0.0657419	-0.049812	0.171236	-0.0142126	S. pombe SPAC3G9.06 /DEF=phenylalanine-tRNA ligase (alpha subunit) (predicted)
1776567_at	0.0641063	-0.0803293	0.374582	-0.0826737	S. pombe SPAPB17E12.07c /DEF=tRNA-splicing endonuclease (subunit) (predicted)
1775019_at	-0.00280889	0.00193437	0.0229019	0.174383	S. pombe SPCC338.16 /GEN=pof3 /DEF=F-box protein
1778336_at	-0.132575	0.381687	-0.611371	-0.0149142	S. pombe SPACUNK4.16c /DEF=glycosyl transferase family 20
1776207_at	0.0985718	-0.124965	0.302789	-0.0481103	S. pombe SPBC25B2.09c /DEF=arginine-tRNA ligase
1774706_at	0.0584888	-0.155088	-0.0206394	0.0934035	S. pombe SPBC409.18 /DEF=phosphatidic acid phosphatase (predicted)
1777755_at	-0.0407565	0.0415379	-0.0611585	0.0362062	S. pombe SPAC12G12.15 /GEN=sif3 /DEF=localization spindle pole body (associated with) (pers. comm. Osami Niwa)
1775405_at	0.278921	-0.0910575	0.899839	-0.158666	S. pombe SPBC23G7.07c /DEF=conserved eukaryotic protein
1778208_at	0.0821861	-0.0603085	0.111357	-0.06414	S. pombe SPAC1486.08 /DEF=involved in cytochrome c oxidase biogenesis (predicted)
1779496_at	-0.0232932	0.0478932	-0.0954892	0.0660327	S. pombe SPBC336.11 /DEF=GARP complex (predicted)
1778436_at	0.164158	-0.142214	0.0924254	-0.210787	S. pombe SPAC3C7.12 /GEN=noc1 /DEF=microtubule-associated protein (PMID 11007487)
1773205_at	0.0794751	-0.172662	0.0515547	-0.111916	S. pombe SPAC1D4.01 /DEF=sequence orphan
1771285_at	-0.0540997	0.245369	-0.0505152	0.110278	S. pombe SPBC20F10.03 /DEF=conserved eukaryotic protein
1777246_at	-0.102249	0.329	-0.408534	0.0751193	S. pombe SPBP8B7.23 /DEF=zinc finger protein
1771660_s_at	-0.0135117	0.133484	-0.0993557	0.029384	S. pombe SPAC1420.03 /GEN=rpn501 /DEF=19S proteasome regulatory subunit (PMID 12783882)
1769664_at	0.111929	-0.0459696	-0.0124976	-0.260251	S. pombe SPAC17G6.09 /GEN=sec62 /DEF=protein signal sequence binding activity
1771555_at	0.284575	-0.095602	0.80651	-0.216433	S. pombe SPBC9B6.07 /DEF=involved in rRNA processing (predicted)
1770552_s_at	0.161916	-0.53246	0.458399	-0.189671	S. pombe SPAC977.07c /DEF=glycoprotein (predicted)
1776500_at	0.0769663	-0.0231463	0.169751	-0.0328649	S. pombe SPBC839.04 /GEN=rpl803 /DEF=60S ribosomal protein L8
1770833_at	-0.0467739	-0.00846545	0.0594355	0.00245953	S. pombe SPBC1734.14c /GEN=suc1 /DEF=cyclin-dependent protein kinase (regulatory subunit)
1773403_at	0.0652253	-0.0561943	0.174376	-0.0176271	S. pombe SPBC12D12.03 /GEN=cct1 /DEF=chaperonin-containing T-complex
1775921_at	0.288397	0.0856485	0.339095	-0.0935129	S. pombe SPCC1223.13 /DEF=sequence orphan
1774958_at	0.132402	-0.0708148	0.322441	-0.209127	S. pombe SPAC2F3.06c /GEN=kap104 /DEF=karyopherin
1775533_at	-0.078289	0.090016	-0.10165	0.0771284	S. pombe SPCC1682.01 /GEN=qcr9 /DEF=ubiquinol-cytochrome-c reductase complex subunit 10
1775700_at	0.140415	-0.773258	-0.185177	0.317923	S. pombe SPBPB8B6.03 /DEF=acetamidase (predicted)
1770905_at	-0.898168	0.367967	-1.49128	0.346615	S. pombe SPCC965.07c /GEN=gst2 /DEF=glutathione S-transferase (PMID 11997110)
1772299_at	0.198576	0.0449254	-0.144047	-0.111321	S. pombe SPCC736.15 /DEF=hypothetical protein
1772471_at	0.0204767	0.165387	-0.0503839	-0.174076	S. pombe SPAC14C4.13 /GEN=rad17 /DEF=involved in DNA damage checkpoint (PMID 8019001)
1776904_at	0.0411692	0.0467428	-0.0587858	-0.212815	S. pombe SPAC890.06 /DEF=nucleoporin
1779228_at	0.0911948	-0.107486	-0.101538	0.0084238	S. pombe SPAC8C9.14 /GEN=prr1 /DEF=transcription factor
1778944_at	0.0854934	-0.0362151	0.210174	-0.124573	S. pombe SPAC1782.08c /DEF=exonuclease (predicted)
1777852_s_at	-0.264566	-0.601736	0.463414	0.051788	S. pombe SPAC977.06 /DEF=DUF999
1779658_at	-0.205768	0.0490341	0.11159	-0.0294603	S. pombe SPAC323.06c /GEN=uba5 /DEF=ubiquitin activating enzyme
1777438_at	0.144448	-0.0372521	0.101002	0.162564	S. pombe SPCPB1C11.01 /DEF=ammonium transporter (predicted)
1776929_at	-0.273608	0.171605	-0.149407	0.209406	S. pombe SPAC227.04 /DEF=autophagy C terminal domain family
1771582_at	-0.00871118	-0.139078	0.0864372	-0.0068086	S. pombe SPBC9B6.09c /DEF=transport ATP binding protein
1776433_at	-0.0464392	-0.0314398	-0.112623	0.126396	S. pombe SPACUNK4.15 /DEF=hypothetical protein
1778301_at	-0.0158669	0.0625073	-0.0666246	0.0265532	S. pombe SPAC4A8.15c /GEN=cdc3 /DEF=profilin
1769704_at	0.109394	-0.0538877	0.652403	-0.0847302	S. pombe SPAC56F8.09 /DEF=methyltransferase activity (predicted)
1770761_at	0.0756661	-0.0590051	0.357001	-0.0518462	S. pombe SPAC24H6.02c /DEF=conserved eukaryotic protein
1778138_at	0.329756	-0.188193	0.804199	-0.376859	S. pombe SPBC11G11.05 /DEF=sequence orphan
1772042_at	0.145841	-0.0751038	0.202675	-0.161507	S. pombe SPAC139.01c /DEF=XP-G family
1771335_at	0.0619033	-0.113937	0.11268	-0.105577	S. pombe SPAC1071.08 /GEN=rpp203 /DEF=60S acidic ribosomal protein (P2C subunit)
1774441_at	-0.0690552	0.145762	-0.200458	0.0638132	S. pombe SPAC23D3.07 /DEF=20S proteasome component (beta 2)
1776629_at	-0.0758368	0.0813198	-0.0798044	0.103888	S. pombe SPCC330.11 /DEF=BTB domain
1771414_at	0.104346	-0.097963	0.163257	-0.201669	S. pombe SPAC3F10.08c /DEF=conserved fungal protein
1776482_at	-0.165287	0.305583	-0.498212	-0.056983	S. pombe SPCC830.07c /GEN=psi1 /DEF=DNAJ domain protein
1775375_at	0.16074	-0.117216	0.0989405	-0.153984	S. pombe SPBC23E6.08 /GEN=sat1 /DEF=involved in G1 phase arrest (starvation induced)
1770498_at	0.127927	0.100391	-0.0622813	-0.136352	S. pombe SPAC31A2.12 /DEF=arrestin family
1769918_at	-0.110375	-0.1038	0.172624	0.0195758	S. pombe SPAC21E11.07 /DEF=CCR4-Not complex (predicted)
1779833_at	-0.336157	0.178861	-0.322329	0.233006	S. pombe SPCC1259.12c /DEF=SPRY domain
1777003_at	-0.0163771	0.133479	-0.107844	0.052955	S. pombe SPBP23A10.15c /GEN=qcr1 /DEF=peptidase family M16
1772707_at	-0.0269496	-0.00602404	-0.0294317	0.11697	S. pombe SPBC15D4.15 /GEN=pho2 /DEF=p-nitrophenylphosphatase (PMID 1645660)
1772406_at	-0.0158844	-0.0727889	0.0194197	0.0993179	S. pombe SPBC336.06c /GEN=rnh1 /DEF=ribonuclease H activity
1775850_at	-0.464142	-0.395703	-0.141637	0.666549	S. pombe SPAC1039.01 /DEF=amino acid permease family
1772771_at	-0.158915	0.457813	-0.607881	0.0108423	S. pombe SPBC21H7.06c /DEF=conserved eukaryotic protein
1770309_at	0.204596	-0.0443319	-0.212808	0.0300601	S. pombe SPAC22H10.07 /GEN=scd2 /DEF=involved in conjugation (regulation)
1776119_at	-0.115061	0.0957152	-0.384136	0.33394	S. pombe SPCC162.06c /DEF=involved in intracellular protein transport
1775288_at	-0.111765	0.0524635	-0.0275749	0.0842851	S. pombe SPAC821.06 /GEN=spn2 /DEF=septin (predicted)
1769353_at	0.153238	-0.120087	0.308233	-0.253887	S. pombe SPBC2D10.12 /GEN=rhp23 /DEF=involved in DNA repair (PMID 10652237)
1772409_at	-0.0964467	0.0293945	0.048199	-0.0325133	S. pombe SPAC23H4.04 /DEF=tRNA methyltransferase (predicted)
1774428_at	-0.121152	-0.140624	0.295325	0.00243346	S. pombe SPAP27G11.07c /DEF=serinethreonine protein kinase (predicted)
1769893_at	0.0454874	-0.11495	-0.462446	0.0954456	S. pombe SPAC4A8.05c /GEN=myp2 /DEF=myosin (type II) (heavy chain) (PMID 9398685)
1779521_at	0.00791804	-0.00583712	-0.0496416	0.127648	S. pombe SPCC417.10 /DEF=membrane transporter
1772187_at	-0.269376	0.182513	-0.562253	0.188428	S. pombe SPCC645.03c /GEN=isa1 /DEF=iron-sulfur protein (PMID 11941510)
1776789_at	-0.100061	-0.0102752	0.0748202	-0.0115019	S. pombe SPCC1235.03 /DEF=smr domain protein (small muts related protein)
1771128_at	0.0314973	-0.010478	0.0872558	-0.0600977	S. pombe SPAC26H5.10c /GEN=tif51 /DEF=translation initiation factor
1769413_at	0.0668694	-0.0817556	0.0462882	0.00965341	S. pombe SPBPJ4664.01 /GEN=dps1 /DEF=polyprenyl synthetase (PMID 9133618)
1770382_at	0.0325667	-0.086669	0.10041	-0.00856018	S. pombe SPAC2E1P5.02c /DEF=hypothetical protein
1777742_at	0.0355361	0.204088	-0.215738	0.0550089	S. pombe SPAC9.05 /DEF=DEADDEAH box helicase
1776190_at	0.0237427	-0.203382	0.0981461	0.091101	S. pombe SPBC1198.02 /GEN=dea2 /DEF=adenine deaminase (PMID 14643670)
1774811_at	0.0984532	-0.12381	0.556626	-0.145663	S. pombe SPAC27E2.02 /DEF=RWD domain
1776252_at	0.100347	-0.17101	0.537477	-0.0411981	S. pombe SPCC188.10c /DEF=pseudo
1776806_at	0.109969	-0.0979067	0.10671	-0.367228	S. pombe SPAC607.04 /DEF=inositol polyphosphate kinase (predicted)
1773350_at	-0.0489664	0.059514	0.0961266	-0.0107498	S. pombe SPCC126.02c /GEN=pku70 /DEF=DNA helicase
1776035_at	0.0883214	-0.115198	0.0126731	-0.0228624	S. pombe SPBC21C3.05 /GEN=sap62 /DEF=localization spliceosome complex
1769486_at	0.0866133	-0.256962	0.325892	-0.111543	S. pombe SPAC1F3.07c /DEF=sequence orphan
1776412_at	0.0139573	-0.0301736	-0.0202382	0.0224838	S. pombe SPAC27E2.11c /DEF=glycoprotein (predicted)
1771909_at	-0.0312411	0.0270913	0.131648	-0.121791	S. pombe SPBC30B4.07c /GEN=tfb4 /DEF=transcription initiation factor activity
1772413_at	-0.191471	0.112976	-0.0849536	0.499339	S. pombe SPBC1683.02 /DEF=adenine deaminase (predicted)
1771301_at	-0.342383	0.453717	-0.925479	0.0624526	S. pombe SPAC31G5.21 /DEF=conserved eukaryotic protein
1779863_at	0.0673682	-0.125931	0.184818	-0.0677834	S. pombe SPAC27D7.07c /GEN=smd1 /DEF=small nuclear ribonucleoprotein (snRNP)
1777434_at	-0.102852	0.534631	-0.685029	0.251066	S. pombe SPBPB21E7.01c /GEN=eno102 /DEF=enolase (predicted)
1770875_at	0.0377766	0.111158	-0.0380274	-0.115176	S. pombe SPACUNK4.07c /GEN=cta4 /DEF=P-type ATPase (PMID 12707717)
1778538_at	0.177332	0.294114	-0.321316	-0.0171823	S. pombe SPCC594.01 /DEF=hypothetical protein
1772011_s_at	-0.110463	-0.94006	0.252591	-0.0232503	S. pombe SPBPB10D8.07c /DEF=malate permease (predicted)
1770493_at	-0.00539525	-0.0192372	0.0471471	0.00278409	S. pombe SPBC3H7.04 /DEF=superoxide dismutase (predicted)
1775502_at	-0.00291125	0.116208	0.00397778	-0.0484198	S. pombe SPBP8B7.04 /DEF=sequence orphan
1772575_at	0.019509	-0.0231632	-0.13931	0.0703379	S. pombe SPAC15A10.03c /GEN=rhp54 /DEF=DEADDEAH box helicase
1770516_at	0.134713	-0.0695985	0.178802	-0.179275	S. pombe SPAC22G7.09c /GEN=nup45 /DEF=nucleoporin
1774597_at	0.0209818	-0.00752163	0.0745519	-0.0733506	S. pombe SPAC806.06c /DEF=nicotinamide mononucleotide (NMN) adenylyltransferase (putative)
1778164_at	0.084857	0.0622635	-0.489586	0.0161533	S. pombe SPBC19C2.11c /DEF=hypothetical protein
1779067_at	0.238288	-0.326747	0.0892712	-0.0492671	S. pombe SPAC8E11.07c /GEN=alp31 /DEF=chaperone activity
1776493_at	-0.0239439	0.0183592	-0.110146	-0.0554123	S. pombe SPAC30C2.06c /GEN=dml1 /DEF=involved in mitochondrial genome maintenance
1778845_at	0.016016	-0.0293134	0.0116841	-0.0143398	S. pombe SPBC11C11.07 /GEN=rpl1801 /DEF=60S ribosomal protein L18
1779064_at	-0.018364	0.69267	-0.0325394	-0.180632	S. pombe SPAC23C11.10 /DEF=conserved eukaryotic protein
1775679_at	-0.0339416	-0.046573	0.17544	0.094442	S. pombe SPAC12G12.14c /GEN=pfs2 /DEF=WD repeat protein
1770359_at	0.0895014	-0.340221	0.182179	-0.0561736	S. pombe SPCC188.04c /DEF=involved in intracellular protein transport (predicted)
1779449_at	0.0404711	-0.0316833	0.057833	-0.104835	S. pombe SPBC18H10.03 /GEN=tif35 /DEF=translation initiation factor
1776836_at	0.140615	-0.467771	0.305898	-0.183006	S. pombe SPBC1105.17 /GEN=cnp1 /DEF=histone H3 variant
1777906_at	0.087417	0.0338128	-0.157619	-0.143649	S. pombe SPAC7D4.03c /DEF=sequence orphan
1774611_at	0.0817808	-0.065347	0.0195074	-0.0425091	S. pombe SPAC3H8.10 /GEN=spo20 /DEF=CRALTRIO domain
1776830_at	-0.224289	-0.0182552	-0.223206	0.215246	S. pombe SPAC11H11.01 /DEF=hypothetical protein
1772002_at	-0.0396703	0.0413122	-0.0528866	0.0434917	S. pombe SPAC1782.07 /GEN=qcr8 /DEF=ubiquinol-cytochrome-c reductase complex subunit 7
1773957_at	0.262191	-0.167422	0.539936	-0.4123	S. pombe SPBC106.14c /DEF=involved in actin cytoskeletal organization (regulation) (predicted)
1776657_at	-0.00668621	-0.169149	0.0769628	0.154213	S. pombe SPAC23H4.18c /GEN=pip1 /DEF=SCF ubiquitin ligase complex
1773188_at	0.105936	-0.0360676	0.23085	-0.0934687	S. pombe SPCC4G3.11 /DEF=conserved fungal protein
1769370_at	0.108987	0.154904	-0.223605	-0.146592	S. pombe SPAC17A5.12 /GEN=ucp7 /DEF=UBA domain
1780136_at	0.0429287	-0.118474	-0.0148878	0.0725295	S. pombe SPBC19G7.07c /DEF=hypothetical protein
1777136_at	0.0581802	-0.0138496	0.0916828	-0.125886	S. pombe SPAC13G7.09c /DEF=sequence orphan
1770499_at	-0.443868	0.511613	-1.34233	0.0564232	S. pombe SPAC26F1.04c /DEF=zinc binding dehydrogenase (predicted)
1774788_at	0.141389	-0.194884	0.489245	-0.166886	S. pombe SPBP16F5.06 /DEF=localization nucleolus (predicted)
1778376_at	-0.0368897	-0.0257969	-0.00367991	0.0503626	S. pombe SPCC613.11c /GEN=meu23 /DEF=B13958 domain
1774970_at	-0.00442473	0.00439835	-0.121098	0.0876061	S. pombe SPBC19C7.10 /DEF=APSES domain
1773752_at	0.0643775	0.0112626	-0.0631682	-0.0888004	S. pombe SPCC553.04 /GEN=cyp9 /DEF=cyclophilin
1772619_at	-0.0098381	-0.165181	0.386398	-0.0401929	S. pombe SPAC1805.03c /DEF=conserved eukaryotic protein
1778346_at	0.0801824	-0.0603698	-0.447904	0.112412	S. pombe SPAC1687.08 /DEF=sequence orphan
1772380_at	-0.0351028	0.0580308	0.0548372	-0.0820204	S. pombe SPBC27.08c /GEN=met3 /DEF=sulfate adenylyltransferase (predicted)
1774039_at	-0.351221	0.27034	-0.685969	0.343008	S. pombe SPAC589.07c /DEF=WD repeat protein
1777532_at	0.0122286	-0.00262737	0.100671	0.0635471	S. pombe SPCC622.06c /DEF=dubious
1772667_at	0.0803331	-0.161632	0.0747852	-0.0880953	S. pombe SPBC337.14 /GEN=rpb4 /DEF=DNA-directed RNA polymerase (II subunit)
1779616_at	0.0932932	-0.0501251	0.0896168	-0.073163	S. pombe SPBC337.07c /DEF=carboxypeptidase (predicted)
1775551_at	-0.0356668	0.0217775	-0.0571394	0.0224148	S. pombe SPCC1020.12c /DEF=xap-5-like protein
1775979_at	0.206787	-0.178498	0.758194	-0.0566403	S. pombe SPCC126.03 /GEN=lps1 /DEF=tRNA pseudouridylate synthase
1776406_at	0.557885	-0.553756	1.83293	-0.0519524	S. pombe SPCC1529.01 /DEF=MFS multidrug efflux transporter
1776976_at	-0.0778313	0.255713	-0.116636	-0.0216627	S. pombe SPBC2F12.13 /GEN=klp5 /DEF=kinesin-like protein
1771496_at	-0.0264308	0.0182352	-0.0147552	0.0209392	S. pombe SPAC26F1.06 /GEN=gpm1 /DEF=phosphoglycerate mutase (PMID 8110200)
1772466_at	0.157479	-0.00866286	0.0364745	-0.114899	S. pombe SPAC3C7.02c /DEF=hypothetical protein
1774514_at	0.00183709	-0.331021	0.314941	-0.0224527	S. pombe SPCC16C4.16c /DEF=conserved fungal protein
1780189_at	0.135637	-0.144205	0.485554	-0.223421	S. pombe SPBC16E9.10c /DEF=AAA family ATPase
1772931_at	0.0125767	-0.0345357	0.130125	-0.127321	S. pombe SPAC16E8.12c /DEF=sequence orphan
1771011_at	-0.132744	0.203364	-0.173912	0.0590337	S. pombe SPCC663.06c /DEF=short chain dehydrogenase (predicted)
1777231_at	0.0348504	-0.0674076	0.0668875	-0.105021	S. pombe SPBP23A10.08 /GEN=alp5 /DEF=actin-like protein
1771247_at	0.151343	-0.266853	0.362151	-0.212547	S. pombe SPCC126.01c /DEF=WD repeat protein
1777636_at	0.00871754	-0.203202	-0.444428	0.50855	S. pombe SPCC417.06c /DEF=serinethreonine protein kinase (predicted)
1779987_at	0.949761	-0.367824	0.162286	-0.143906	S. pombe SPAC1F7.07c /GEN=fip1 /DEF=iron permease
1776706_at	0.196685	-0.283204	0.262853	-0.108558	S. pombe SPBC1A4.04 /DEF=hypothetical protein
1773014_at	-0.372735	0.283124	-0.424836	0.623076	S. pombe SPCC663.08c /DEF=short chain dehydrogenase (predicted)
1771477_at	-0.393465	0.193168	-0.616942	0.213105	S. pombe SPAC1610.04 /DEF=hypothetical protein
1777625_at	-0.0382236	-0.159863	0.217439	0.0545902	S. pombe SPCC1235.13 /GEN=ght6 /DEF=meiotic expression upregulated
1775885_at	-0.208024	0.125386	-0.149232	0.13565	S. pombe SPBC1347.03 /GEN=meu14 /DEF=involved in meiosis (PMID 12759375)
1770119_at	-0.39715	0.198236	-0.483113	0.607184	S. pombe SPAC11D3.16c /DEF=sequence orphan
1775749_at	-0.130064	0.110964	-0.0901413	-0.0237169	S. pombe SPAC30C2.03 /DEF=hypothetical protein
1774799_at	0.0142562	0.158914	-0.141898	-0.0344861	S. pombe SPBP19A11.03c /GEN=mts4 /DEF=19S proteasome regulatory subunit
1773795_at	0.0687698	-0.00443617	0.105231	-0.081391	S. pombe SPBC13E7.08c /DEF=proteasome interacting protein (predicted)
1774446_at	-0.00927321	0.0709477	-0.0617739	0.0495812	S. pombe SPBC19G7.01c /GEN=msh2 /DEF=MutS family
1769652_at	0.0844822	-0.032464	0.108077	-0.104457	S. pombe SPAC959.07 /GEN=rps403 /DEF=40S ribosomal protein S4
1774232_at	-0.115214	-0.0175908	0.0401678	0.0576108	S. pombe SPCC777.07 /DEF=glycolipid 2-a-mannosyltransferase (predicted)
1779915_at	0.0118691	0.0142063	0.0291732	-0.123123	S. pombe SPBC83.08 /DEF=AAA family ATPase
1769340_at	-0.0762463	0.0827436	-0.088035	0.0297813	S. pombe SPAC24C9.16c /GEN=cox8 /DEF=cytochrome c oxidase subunit VIII
1772953_at	-0.0275237	0.0228459	0.0402349	-0.0651627	S. pombe SPAC27F1.08 /DEF=Nramp family
1773798_at	-0.130829	-0.0357714	-0.0312815	0.0915753	S. pombe SPACUNK4.13c /DEF=GTP binding
1773265_at	-0.0503461	-0.163627	-0.178394	0.367756	S. pombe SPAC1F5.11c /DEF=phosphatidylinositol kinase (predicted)
1770327_at	-0.0193087	0.0229594	0.0845683	-0.129297	S. pombe SPAC1F3.06c /GEN=spo15 /DEF=involved in sporulation (required)
1774639_at	0.0942148	-0.0313158	0.112536	-0.10299	S. pombe SPCC16A11.06c /DEF=alpha-1,2 mannosyltransferase (predicted)
1776313_at	0.141656	-0.0564852	0.423079	-0.289604	S. pombe SPBC4F6.13c /DEF=WD repeat protein
1778927_at	0.0442527	0.0109978	0.0149082	-0.204007	S. pombe SPBC19G7.15 /GEN=nup44 /DEF=nucleoporin
1777811_at	0.0445127	0.0936267	-0.0872504	-0.0347582	S. pombe SPAC9E9.13 /GEN=wos2 /DEF=p23 homolog (PMID 10581266)
1773663_at	0.147159	-0.0431499	0.417746	-0.105522	S. pombe SPAC2F7.14c /DEF=exosome (RNase complex) (predicted)
1776786_at	-0.336252	0.200895	-0.310171	0.356443	S. pombe SPCPJ732.02c /DEF=xylulose kinase (predicted)
1778071_at	-0.251201	0.181205	-0.18681	0.148312	S. pombe SPAC3A11.11c /DEF=aldoketo reductase (predicted)
1779288_at	0.0215165	-0.0334374	0.141302	-0.0121851	S. pombe SPCC550.08 /DEF=N-acetyltransferase (predicted)
1778959_at	0.087664	-0.0215762	0.32961	-0.13722	S. pombe SPCC663.10 /DEF=conserved eukaryotic protein
1775561_at	-0.00726446	-0.0879218	0.0964076	-0.147193	S. pombe SPBC16G5.12c /GEN=top3 /DEF=DNA topoisomerase III
1775064_at	0.0535399	-0.221559	0.18214	-0.311875	S. pombe SPBC31F10.08 /GEN=mde2 /DEF=involved in meiosis (implicated)
1771156_at	-0.0393937	0.130536	-0.0958408	0.199023	S. pombe SPAC4G9.04c /DEF=involved in polyadenylation (predicted)
1772679_at	-0.0774012	0.0215111	0.108669	-0.0427446	S. pombe SPAC1F5.03c /DEF=oxidoreductase (predicted)
1772061_at	0.200543	0.166313	-0.00136121	-0.404827	S. pombe SPAC222.07c /GEN=hri2 /DEF=serinethreonine protein kinase
1774530_at	0.413498	-0.207552	0.830241	-0.231447	S. pombe SPAC1A6.02 /DEF=WD repeat protein
1775559_at	-0.0637693	0.199163	-0.263018	0.0179771	S. pombe SPBC4C3.12 /GEN=sep1 /DEF=fork head domain
1773152_at	-0.0239407	-0.0270675	-0.26431	0.0879517	S. pombe SPAC1A6.03c /DEF=lysophospholipase (predicted)
1779899_at	-0.158963	0.135174	-0.566084	0.11706	S. pombe SPCC584.15c /DEF=arrestin family
1775372_at	0.0456909	0.00184504	-0.152278	0.0177196	S. pombe SPBC713.11c /DEF=UPF0057 family
1774866_at	0.00393041	0.00518004	-0.0967115	0.189241	S. pombe SPBC36B7.09 /DEF=RWD domain
1772428_at	0.0508537	-0.0404545	0.0436227	-0.0498972	S. pombe SPBC1773.10c /DEF=asparagine-tRNA ligase (predicted)
1770929_at	0.0903412	-0.13906	0.115293	-0.0985546	S. pombe SPAC9G1.08c /DEF=lysophospholipase (predicted)
1777501_at	-0.0371726	-0.0656287	0.0868171	0.015763	S. pombe SPBC11B10.01 /DEF=glycosyl transferase family 1
1772036_at	0.109881	0.103218	-0.135533	-0.181077	S. pombe SPBC36.11 /DEF=hypothetical protein
1770545_at	0.377336	0.0679782	-0.447846	0.0125901	S. pombe SPCC4F11.04c /DEF=mannosyltransferase (predicted)
1775838_at	-0.0752325	0.147345	-0.0873051	0.0643663	S. pombe SPBC4C3.06 /DEF=hypothetical protein
1769578_at	0.0514387	0.0151186	-0.0468508	-0.0477893	S. pombe SPAC3H1.04c /DEF=conserved fungal protein
1771294_at	-0.104539	0.0733992	0.0409435	-0.0716015	S. pombe SPAC23H4.14 /GEN=vps39 /DEF=CNH domain
1775414_at	-0.0403007	0.0758146	-0.145757	0.0157903	S. pombe SPAC2G11.03c /GEN=vps45 /DEF=sec1 family
1778946_at	0.200461	-0.0569735	0.500484	-0.260991	S. pombe SPBC1105.01 /DEF=HEAT repeat (ISS) (PMID 14729571)
1772107_at	0.00314681	0.0503721	-0.0501188	0.136396	S. pombe SPAC1093.02 /DEF=pyridoxamine 5-phosphate oxidase (predicted)
1773249_at	-0.0621783	0.145792	-0.175778	0.0756861	S. pombe SPAC607.05 /GEN=rpn9 /DEF=19S proteasome regulatory subunit
1775632_at	-0.097379	-0.0448923	-0.0429611	0.122848	S. pombe SPCC757.10 /GEN=vph2 /DEF=involved in vacuolar ATPase assembly
1779328_at	-0.0147346	-0.048543	0.0544484	0.046073	S. pombe SPCC61.01c /GEN=str2 /DEF=membrane transporter
1772908_at	-0.148957	0.0144278	0.130079	-0.0611763	S. pombe SPAC24H6.01c /DEF=O-acyl transferase (predicted)
1774793_at	-0.330942	0.205703	-0.408689	0.215774	S. pombe SPBC19F8.01c /GEN=spn7 /DEF=septin
1776454_at	0.127453	0.0290807	-0.0143045	-0.107459	S. pombe SPBC17D1.01 /DEF=hypothetical protein
1774568_at	0.0378281	-0.0214186	0.334603	-0.124468	S. pombe SPCC16C4.05 /DEF=RNase P and RNase MRP subunit (predicted)
1776237_at	0.0358159	-0.0707121	0.0565942	-0.0498784	S. pombe SPBC16D10.11c /GEN=rps1801 /DEF=40S ribosomal protein S18
1773396_at	0.00557804	-0.371214	-0.0153742	0.114119	S. pombe SPBPJ4664.02 /DEF=glycoprotein (predicted)
1776001_at	0.184663	-0.0436325	0.205592	-0.304752	S. pombe SPAC18G6.11c /GEN=rrn3 /DEF=RNA polymerase I specific transcription initiation factor (predicted)
1775061_at	0.586025	0.00744311	0.514623	-0.145155	S. pombe SPAC821.08c /GEN=slp1 /DEF=WD repeat protein
1775658_at	-0.0544949	0.104878	-0.239621	0.0482035	S. pombe SPAC26A3.14c /DEF=dubious
1779244_at	-0.0103823	0.0839898	-0.160316	0.0284758	S. pombe SPAC29B12.01 /DEF=SNF2 family
1770555_at	0.00484594	0.0279099	0.0715097	-0.0578941	S. pombe SPBP35G2.09 /DEF=U1 snRNP component (predicted)
1774132_at	-0.000116666	0.163298	-0.0184994	-0.0769819	S. pombe SPBC725.07 /GEN=pex5 /DEF=peroxisomal targeting signal receptor (predicted)
1777822_at	-0.333132	0.202854	-0.385924	0.277158	S. pombe SPAC1952.17c /DEF=TBC domain protein
1776785_at	0.0593335	-0.126899	0.121364	-0.0337836	S. pombe SPBC1685.07c /DEF=amino acid transporter (predicted)
1771699_at	-0.0790081	0.0285425	-0.375027	0.0997553	S. pombe SPBC16C6.06 /GEN=pep1 /DEF=glycoprotein (predicted)
1773563_at	0.0777969	-0.0331856	0.248594	-0.162529	S. pombe SPBC776.04 /GEN=sec2302 /DEF=GTPase activating protein (predicted)
1779909_at	-0.0332422	0.0273596	-0.0734828	0.134891	S. pombe SPAPB1A10.10c /GEN=ypt71 /DEF=GTPase
1773956_at	0.105435	0.025136	-0.114006	-0.0201184	S. pombe SPBC530.08 /DEF=transcriptional regulator (predicted)
1771244_at	-0.0808341	-0.0322113	0.125473	-0.0246058	S. pombe SPAC15A10.12c /DEF=conserved eukaryotic protein
1771564_at	-0.0685813	-0.188109	0.475903	0.0148907	S. pombe SPCC736.02 /DEF=hypothetical protein
1772982_at	-0.133403	0.108411	-0.108172	0.150533	S. pombe SPAPB2B4.01c /DEF=N-acetylglucosaminylphosphatidylinositol deacetylase activity (predicted)
1776771_at	0.0623732	-0.0428801	0.0694847	-0.314232	S. pombe SPBC30B4.05 /GEN=kap109 /DEF=karyopherin (predicted)
1773516_at	-0.119036	-0.0371272	0.096536	0.0455281	S. pombe SPBC24C6.07 /GEN=cdc14 /DEF=SIN component
1776543_at	-0.000708262	-0.335916	-0.0482721	0.531142	S. pombe SPAC869.10c /DEF=amino acid transporter (predicted)
1771127_at	0.146912	-0.103438	0.243692	-0.262436	S. pombe SPAC29A4.09 /DEF=conserved eukaryotic protein
1770658_at	-0.035121	-0.0970561	0.254838	0.0562096	S. pombe SPBC3D6.10 /GEN=apn2 /DEF=DNA-(apurinic or apyrimidinic site) lyase activity (predicted)
1776149_at	0.0641308	-1.14826	0.125132	-0.148814	S. pombe SPAC1834.03c /GEN=hhf1 /DEF=histone H4
1776277_x_at	0.0451422	-0.959862	0.0856387	-0.0977112	S. pombe SPAC1834.03c /GEN=hhf1 /DEF=histone H4
1773951_at	0.549056	-0.318131	1.09288	-0.46264	S. pombe SPBC17D1.06 /DEF=DEADDEAH box helicase
1780219_at	-0.349886	-0.201503	0.254244	0.244997	S. pombe SPBC409.03 /GEN=swi5 /DEF=involved in mating-type switching (PMID 2598273)
1770143_at	0.0361258	-0.0715164	0.0430113	-0.201547	S. pombe SPCC777.14 /GEN=prp4 /DEF=serinethreonine protein kinase
1771054_at	0.0857175	0.0574799	-0.0280994	-0.0507936	S. pombe SPCC162.08c /GEN=nup211 /DEF=coiled-coil (predicted)
1778714_at	0.0864773	0.0213315	0.0802905	-0.0727736	S. pombe SPCC1919.01 /DEF=serinethreonine protein kinase (predicted)
1771661_at	0.232076	-0.0733782	-0.177902	0.050216	S. pombe SPCC553.12c /DEF=low similarity to NADH dehydrogenase subunit 2 by multiple alignment
1771255_at	-0.130605	0.105416	-0.0926739	0.37249	S. pombe SPAPB24D3.03 /DEF=arginase family
1771995_at	0.0529699	0.141461	-0.100005	-0.153639	S. pombe SPAC26H5.11 /DEF=involved in spore wall assembly (predicted)
1779998_at	0.0398226	-0.0804313	0.0247132	-0.0179195	S. pombe SPBC18H10.13 /GEN=rps1402 /DEF=40S ribosomal protein S14
1778657_at	0.0331968	-0.0789798	0.15755	-0.0191596	S. pombe SPBC16H5.04 /DEF=involved in inorganic phosphate transport (regulation) (predicted)
1770322_at	0.0489575	-0.0782957	0.121648	-0.198075	S. pombe SPAC30D11.05 /GEN=aps3 /DEF=AP-3 adaptor complex (predicted)
1780034_at	0.0061423	-0.0979865	0.235869	-0.0207885	S. pombe SPBC2G2.13c /DEF=deoxycytidylate deaminase (predicted)
1779903_at	0.309127	-0.619301	0.0380096	-0.0550747	S. pombe SPAC144.14 /GEN=klp8 /DEF=kinesin-like protein
1769513_at	0.0646454	-0.299655	0.153978	-0.0141118	S. pombe SPBC839.16 /DEF=C-1-tetrahydrofolate synthase (predicted)
1773347_at	-0.230806	0.300687	-0.309533	0.220633	S. pombe SPAPB1A10.07c /DEF=conserved eukaryotic protein
1773537_at	0.0299441	-0.211501	0.269082	-0.0589625	S. pombe SPBC577.15c /DEF=TPR repeat protein
1777089_at	-0.148593	0.525921	-0.299957	0.21226	S. pombe SPAC13C5.06c /DEF=sequence orphan
1778990_at	0.0764351	0.270147	-0.212793	0.0681973	S. pombe SPAC8E11.03c /GEN=dmc1 /DEF=RecA family
1775687_at	-0.321712	0.197008	-0.827728	0.102625	S. pombe SPBC32H8.07 /GEN=git5 /DEF=heterotrimeric G protein (beta subunit) (PMID 11238401)
1775857_at	0.0870568	-0.189384	0.128082	-0.0725009	S. pombe SPACUNK4.06c /GEN=rpb7 /DEF=DNA-directed RNA polymerase (II subunit) (PMID 9322754)
1769825_at	-0.460364	-0.586279	0.562207	2.17132	S. pombe SPAC186.06 /DEF=hypothetical protein
1776984_at	-0.0215098	-0.0733703	0.267376	0.0445433	S. pombe SPAC637.12c /GEN=mst1 /DEF=MYST-family HAT (pers. comm. S. Forsburg)
1775406_at	-0.0169665	0.194415	-0.0371695	-0.0826763	S. pombe SPBC1921.03c /GEN=mex67 /DEF=Tap homolog
1776439_at	0.119421	-0.235901	0.263718	-0.523757	S. pombe SPAC110.01 /DEF=serinethreonine protein kinase (predicted)
1770762_at	-0.0295245	0.10238	-0.217189	0.0239887	S. pombe SPBC32H8.13c /GEN=mok12 /DEF=alpha-1,3-glucan synthase
1779719_at	-0.231774	0.0892502	-0.0984736	0.102909	S. pombe SPBC582.10c /DEF=DEADDEAH box helicase
1772357_at	0.131793	0.00791772	-0.00252342	-0.210612	S. pombe SPAC4D7.13 /GEN=prp40 /DEF=involved in mRNA splicing
1778502_at	-0.0237939	-0.0815439	0.0892881	-0.0066576	S. pombe SPCC188.09c /DEF=localization cell surface (predicted)
1773954_at	0.0983181	0.0522855	-0.0526822	-0.105362	S. pombe SPAC16C9.04c /DEF=transcriptional regulator (predicted)
1777045_at	0.0062774	0.140403	-0.0534646	0.0885948	S. pombe SPAC589.11 /DEF=peptide chain release factor (predicted)
1773443_at	0.11305	-0.0516685	0.419626	-0.243563	S. pombe SPCC895.06 /DEF=WD repeat protein
1772151_at	-0.137355	0.415803	-0.411043	0.215083	S. pombe SPAC513.07 /DEF=cinnamoyl-CoA reductase (predicted)
1773248_at	0.555387	-0.882477	0.212967	-0.471395	S. pombe SPAPB1E7.04c /DEF=glycosyl hydrolase family 18
1779024_at	0.244937	-0.0434704	0.0735626	-0.265326	S. pombe SPAC343.19 /DEF=phosphatidylinositol kinase (predicted)
1769382_at	0.029754	-0.226766	0.235129	-0.0143172	S. pombe SPBC16A3.11 /GEN=eso1 /DEF=involved in sister chromatid cohesion (required) (S phase)
1769680_at	0.199125	-0.0457048	0.486357	-0.311357	S. pombe SPAC890.04c /DEF=WD repeat protein
1772760_at	-0.089064	0.134842	-0.17187	0.0279595	S. pombe SPCC594.06c /DEF=SNARE (predicted)
1779581_at	-0.0632111	0.0280377	-0.466596	0.258137	S. pombe SPAC19E9.03 /GEN=pas1 /DEF=cyclin (PMID 10982385)
1772127_at	0.0679	-0.0336501	0.116208	-0.18942	S. pombe SPAC3F10.06c /DEF=initiator tRNA phosphoribosyl transferase (predicted)
1776997_at	0.00869338	-0.0805349	0.155381	-0.0591275	S. pombe SPCC777.08c /DEF=sequence orphan
1775753_at	-0.0243254	0.207353	-0.227455	-0.0178057	S. pombe SPBC660.11 /GEN=tcg1 /DEF=single-stranded telomeric binding protein (PMID 12519786)
1771996_at	0.0257813	0.0225331	-0.00700506	-0.13496	S. pombe SPCC1020.02 /GEN=spc7 /DEF=localization spindle pole body
1778890_at	0.132927	-0.0226164	0.291901	-0.133121	S. pombe SPAC4A8.06c /DEF=esteraselipase (predicted)
1776395_at	0.0338561	-0.0382827	0.0113274	0.0619192	S. pombe SPBC25H2.15 /DEF=conserved eukaryotic protein
1779262_at	0.110933	-0.0659501	0.139148	-0.0948445	S. pombe SPAC16E8.11c /GEN=tfb1 /DEF=transcription initiation factor activity
1773366_at	0.0672194	0.0488647	-0.184423	-0.113576	S. pombe SPAC17H9.10c /GEN=ddb1 /DEF=XP-E family
1776047_at	0.0178254	0.104511	0.230856	-0.256753	S. pombe SPBC19C2.13c /DEF=hypothetical protein
1779797_at	-0.0180893	-0.193371	0.181017	-0.0233285	S. pombe SPAP7G5.04c /GEN=lys1 /DEF=aminoadipate-semialdehyde dehydrogenase
1772359_at	0.0313304	-0.0388082	0.0440712	-0.0748768	S. pombe SPCC364.03 /GEN=rpl1702 /DEF=60S ribosomal protein L17
1770278_at	0.0467548	0.221458	-0.299487	0.137033	S. pombe SPBPB21E7.02c /DEF=pseudo SPAC5H10.03
1775728_at	-0.140801	-0.0181564	0.0190881	0.121774	S. pombe SPAC1486.06 /DEF=nicotinate phosphoribosyltransferase (predicted)
1770254_at	-0.099371	0.158052	0.0281003	0.0383209	S. pombe SPBC21.06c /GEN=cdc7 /DEF=serinethreonine protein kinase
1773040_at	-0.0272309	0.167749	-0.0287482	0.0302232	S. pombe SPCC663.07c /DEF=short chain dehydrogenase pseudogene
1775630_at	0.0123568	-0.806136	1.28574	-0.165808	S. pombe SPAC23C4.06c /DEF=methyltransferase (predicted)
1774925_at	-0.00227865	-0.160977	0.0752182	-0.0126549	S. pombe SPAC3A11.04 /DEF=conserved eukaryotic protein
1770194_at	0.098657	-0.121598	0.170375	-0.0719837	S. pombe SPAC2F7.09c /DEF=NTP binding (predicted)
1772291_at	0.123455	0.328234	-0.261632	-0.0367734	S. pombe SPAPB1A10.05 /DEF=sequence orphan
1779983_at	0.0284802	-0.161989	0.113508	-0.0275663	S. pombe SPAC823.02 /DEF=sequence orphan
1775477_at	-0.0500247	0.0368783	-0.115068	0.0243597	S. pombe SPAC6F6.02c /GEN=pof5 /DEF=F-box protein
1773558_at	-0.19352	0.0195367	-0.0884962	0.0647449	S. pombe SPBC428.06c /DEF=sequence orphan
1775067_at	-0.143384	0.105486	-0.270099	0.0672143	S. pombe SPAC9.13c /GEN=cwf16 /DEF=conserved eukaryotic protein
1775530_at	-0.293721	0.0706825	-0.0591507	0.175904	S. pombe SPAC3G6.03c /DEF=Maf-like protein
1769438_at	-0.0762723	0.224817	-0.110001	0.0823673	S. pombe SPBC29A10.02 /DEF=single-strand polynucleotide binding protein (predicted)
1770869_at	-0.0488011	-0.0542123	0.101437	-0.102545	S. pombe SPBC31F10.11c /GEN=cwf4 /DEF=involved in mRNA splicing
1773556_at	0.0811119	-0.155208	0.0430549	0.0470584	S. pombe SPBC660.13c /GEN=ssb1 /DEF=DNA replication factor A complex (subunit 1) (PMID 9111307) (PMID 8702843)
1772063_at	0.0647831	-0.0159798	0.157034	-0.1555	S. pombe SPBC4.04c /GEN=mcm2 /DEF=MCM complex subunit (PMID 8298187)
1776219_at	-0.230044	0.186646	-0.538778	0.102382	S. pombe SPAC25A8.02 /DEF=hypothetical protein
1774004_at	0.0496594	0.0535355	-0.445838	0.0660264	S. pombe SPCC1020.13c /DEF=phospholipase (predicted)
1771919_at	0.225388	0.0109329	0.0671692	-0.209938	S. pombe SPBC887.10 /GEN=mcs4 /DEF=mitotic catastrophe suppressor
1776499_at	-0.0322987	0.0255591	0.0241667	0.0171909	S. pombe SPAC3A12.05c /GEN=taf2 /DEF=transcription initiation factor activity
1778230_at	-0.211051	0.0140877	-0.00279268	0.149368	S. pombe SPAC343.03 /GEN=apc11 /DEF=anaphase-promoting complex (APC) (PMID 12477395)
1773304_at	-0.0369902	0.0653715	-0.00927925	-0.00646623	S. pombe SPAC7D4.07c /GEN=trx2 /DEF=thioredoxin I (PMID 12020831)
1778239_at	0.36906	-0.684628	0.524054	-0.938783	S. pombe SPBPB10D8.02c /DEF=arylsulfatase (predicted)
1777419_at	0.173304	-0.112433	0.644717	-0.29116	S. pombe SPAC1B9.03c /DEF=RNA-binding protein
1776435_at	-0.267264	0.25399	-0.385994	0.155932	S. pombe SPAC1834.09 /DEF=sequence orphan
1777103_at	-0.1026	0.0098807	-0.0372794	0.112507	S. pombe SPAC13A11.05 /DEF=cytosol aminopeptidase
1777050_at	0.0838836	0.385655	-0.776225	-0.0238069	S. pombe SPAPB24D3.10c /GEN=agl1 /DEF=alpha-glucosidase
1779458_at	0.0279608	-0.140617	0.246969	-0.0218754	S. pombe SPBC1271.04c /DEF=deoxyhypusine synthase
1776163_at	0.00249481	-0.0637499	0.0778373	-0.157051	S. pombe SPCC191.03c /DEF=sequence orphan
1779838_at	0.0572049	-0.186132	0.471037	-0.20576	S. pombe SPBPB10D8.03 /DEF=pseudo transporter
1777715_at	-0.0444253	-0.0435645	0.0780795	0.0114915	S. pombe SPCC1322.06 /GEN=kap113 /DEF=karyopherin
1774498_at	0.156363	-0.0628125	0.354524	-0.222707	S. pombe SPBC11G11.03 /DEF=60S acidic ribosomal protein (predicted)
1769712_at	-0.0832125	0.14725	-0.00233841	0.0168893	S. pombe SPAC19A8.06 /DEF=conserved fungal protein
1776111_at	0.00401449	-0.0209986	0.0270747	0.0547231	S. pombe SPAP27G11.08c /DEF=sequence orphan
1778266_at	0.0470384	-0.141932	0.375958	-0.0431341	S. pombe SPCC550.01c /DEF=CHCH domain
1777487_at	0.0347684	-0.0150293	0.0286468	0.00810909	S. pombe SPAC890.08 /GEN=rpl31 /DEF=60S ribosomal protein L31
1772498_at	-0.00991599	0.0269982	-0.168406	0.133986	S. pombe SPAC13F5.03c /DEF=glycerol dehydrogenase (Phlippen, Stevens, Wolf, Zimmermann manuscript in preparation)
1779701_at	0.0330633	-0.0445191	0.0381937	0.0460145	S. pombe SPAC20H4.07 /GEN=rhp57 /DEF=RecA family
1773791_at	-0.151715	-0.0647844	0.249	0.0339801	S. pombe SPAC589.05c /DEF=conserved protein
1771797_at	0.00489775	0.0655896	-0.18811	0.024155	S. pombe SPBC1734.16c /GEN=pst3 /DEF=SIN3 family co-repressor
1777127_at	0.0566918	-0.0349353	0.0493574	-0.0577141	S. pombe SPAC4F8.13c /GEN=rng2 /DEF=IQGAP
1775680_at	-0.118213	0.0918357	0.050278	-0.132401	S. pombe SPAC5D6.02c /DEF=sequence orphan
1770386_at	-0.119134	-0.108399	0.283636	0.0705675	S. pombe SPAC2G11.15c /DEF=RNA methyltransferase activity (predicted)
1776775_at	0.0400359	-0.109699	0.430104	0.0467691	S. pombe SPAC1782.02c /DEF=hypothetical protein
1773103_at	0.17311	0.0473096	-0.141715	-0.108257	S. pombe SPCC825.03c /GEN=psy1 /DEF=SNARE
1776373_at	0.0574725	0.182705	-0.069787	-0.387772	S. pombe SPAC23A1.02c /DEF=calcineurin-like phosphoesterase
1774816_s_at	-0.233759	0.125985	-0.372512	0.204185	S. pombe SPBC19G7.12c /DEF=sequence orphan
1776494_at	-0.130837	0.214705	-0.0536089	0.0447245	S. pombe SPAC8F11.06 /DEF=hypothetical protein
1771370_at	0.114272	0.0342846	-0.0522315	0.00063769	S. pombe SPAC1F5.04c /GEN=cdc12 /DEF=formin
1779013_at	-0.0497414	0.0288881	0.00358454	-0.00499312	S. pombe SPCC1235.10c /GEN=sec6 /DEF=localization exocyst (predicted)
1771131_at	0.0518506	0.220491	-0.140886	-0.189318	S. pombe SPCC895.05 /GEN=for3 /DEF=formin
1776972_at	0.0166957	-0.0343568	0.0111659	-0.0107018	S. pombe SPBC216.01c /DEF=conserved eukaryotic protein
1778983_at	-0.126996	-0.0799325	0.128281	0.0514253	S. pombe SPCC16A11.11 /GEN=mrpl31 /DEF=mitochondrial ribosomal protein subunit YmL31
1773156_at	0.264762	-0.0576992	-0.66483	0.0947584	S. pombe SPAC4G8.13c /GEN=prz1 /DEF=transcription factor (PMID 12637524)
1779780_at	-0.0300296	0.067008	-0.133583	0.0329885	S. pombe SPBC1604.05 /GEN=pgi1 /DEF=glucose-6-phosphate isomerase (predicted)
1770461_at	0.0222702	-0.071502	0.293775	-0.00409253	S. pombe SPBC15C4.01c /GEN=oca3 /DEF=conserved eukaryotic protein
1774262_at	-0.360119	0.348704	-0.644945	0.437658	S. pombe SPBC3H7.08c /DEF=sequence orphan
1777586_at	-0.00580947	0.0838127	-0.0400864	0.00361729	S. pombe SPAPJ696.02 /DEF=actin cortical patch component (predicted) (PMID 12388763)
1773032_at	-0.0425491	-0.0292861	-0.776875	0.0519797	S. pombe SPBC15C4.06c /DEF=zinc finger protein
1771379_at	0.00259844	0.00879288	-0.0257956	0.0262264	S. pombe SPAC1F8.07c /DEF=pyruvate decarboxylase (predicted)
1774566_at	0.0835139	-0.0318969	0.150407	-0.147789	S. pombe SPAC343.14c /DEF=translation initiation factor
1776327_at	-0.042443	-0.0224622	0.0831734	0.156439	S. pombe SPBC887.11 /DEF=tRNA pseudouridylate synthase (predicted)
1771669_at	0.0162722	0.0194445	-0.206678	0.00296879	S. pombe SPBC365.15 /GEN=alp4 /DEF=gamma tubulin complex
1770028_at	-0.232277	-0.0416889	0.041647	0.229719	S. pombe SPAC3A12.02 /DEF=inorganic pyrophosphatase
1777070_at	0.182636	-0.199066	0.314782	-0.296158	S. pombe SPBC1778.05c /DEF=sequence orphan
1771008_at	-0.213172	0.302799	-0.385155	0.159244	S. pombe SPAC144.17c /DEF=6-phosphofructo-2-kinase
1776762_at	0.120824	0.0257317	-0.0191463	0.0179774	S. pombe SPCC576.13 /DEF=chromatin remodeling complex
1778828_at	-0.0178178	-0.0885305	0.0136429	0.0811907	S. pombe SPBC119.10 /DEF=asparagine synthetase
1772157_at	0.0993554	-0.0549637	-0.399745	0.037873	S. pombe SPAC821.13c /DEF=P-type ATPase (PMID 12707717)
1774389_at	0.0452461	-0.0239875	0.030256	-0.0297963	S. pombe SPCC962.04 /GEN=rps1201 /DEF=40S ribosomal protein S12
1775621_at	0.271519	-0.14763	0.640897	-0.297387	S. pombe SPAC2C4.11c /GEN=rbp28 /DEF=RNA-binding protein
1774318_at	0.151256	-0.026666	0.342195	-0.339358	S. pombe SPCC553.03 /DEF=AAA family ATPase
1774792_at	0.346417	-0.300755	0.274725	0.0529461	S. pombe SPAC22A12.06c /DEF=DUF341
1769589_at	0.206775	-0.13063	0.525075	-0.308609	S. pombe SPAC2F3.03c /GEN=rpa49 /DEF=localization DNA-directed RNA polymerase I complex (subunit)
1776336_s_at	0.219891	-0.805344	-1.28706	0.76376	S. pombe SPBCPT2R1.02 /DEF=hypothetical protein
1777098_at	0.0768925	-0.0375719	0.153619	-0.0989091	S. pombe SPAC17A5.15c /DEF=glutamate-tRNA ligase (predicted)
1777600_s_at	0.0127406	0.206727	0.0392195	-0.0234947	S. pombe SPAC1556.06b /GEN=meu2 /DEF=meiotic expression upregulated (PMID 11376151)
1780203_at	0.118958	-0.0158068	0.213786	-0.263962	S. pombe SPAC3G9.05 /DEF=GIT repeat protein (SMART)
1772895_at	-0.00134977	-0.0285962	0.000665665	0.0862487	S. pombe SPAC13G6.04 /GEN=tim8 /DEF=TIM22 inner membrane protein import complex
1779547_at	-0.0769905	0.134335	0.00410875	0.0135924	S. pombe SPAC29A4.19c /DEF=P-type ATPase (PMID 12707717)
1779164_at	0.05933	0.226525	0.0986449	-0.330835	S. pombe SPBC146.06c /DEF=conserved eukaryotic protein
1770617_at	-0.00496451	-0.192597	0.147894	0.0634781	S. pombe SPAC1A6.06c /GEN=meu31 /DEF=meiotic expression upregulated
1774577_at	0.165486	-0.124756	0.170629	-0.376791	S. pombe SPAC1805.14 /DEF=sequence orphan
1776205_at	-0.0503527	0.0579243	-0.0707232	0.0386963	S. pombe SPCC5E4.03c /GEN=taf72 /DEF=transcription initiation factor activity
1779726_at	-0.214907	0.13105	-0.234719	0.117487	S. pombe SPAC16E8.03 /GEN=gna1 /DEF=glucosamine-phosphate N-acetyltransferase
1772008_at	-0.248398	0.147867	-0.372058	0.085036	S. pombe SPAC23E2.02 /DEF=conserved eukaryotic protein
1772761_at	0.0767107	-0.0401042	0.191046	-0.199119	S. pombe SPBC30D10.18c /GEN=rpl102 /DEF=60S ribosomal protein L10
1771420_at	-0.000984828	0.197288	-0.15861	-0.027317	S. pombe SPBP4H10.04 /GEN=ppb1 /DEF=serinethreonine protein phosphatase (catalytic subunit)
1772113_at	0.0831976	-0.0546255	0.125581	-0.0267035	S. pombe SPAC26F1.13c /DEF=leucine-tRNA ligase (predicted)
1775562_at	0.0106796	0.0721992	-0.00526778	-0.0288912	S. pombe SPAC6B12.12 /GEN=tom70 /DEF=mitochondrial TOM complex component
1779642_at	-0.0392927	0.030817	0.0065368	-0.0616035	S. pombe SPBC691.03c /GEN=apl3 /DEF=adaptin
1779966_at	-0.0124451	0.158022	-0.192745	-0.109041	S. pombe SPCC736.14 /GEN=dis1 /DEF=microtubule-associated protein (PMID 7628693)
1775281_at	-0.111077	-0.00820573	0.205143	-0.0499722	S. pombe SPBC14C8.08c /DEF=dubious
1769934_at	0.127202	-0.131844	0.235151	-0.109198	S. pombe SPBC14F5.13c /DEF=alkaline phosphatase activity (predicted)
1772834_at	-0.23483	0.186565	-1.16407	0.210316	S. pombe SPAC3A11.10c /DEF=microsomal dipeptidase (predicted)
1779240_at	-0.0238663	0.0995216	-0.224351	0.0428931	S. pombe SPCC4B3.17 /GEN=cbp3 /DEF=ubiquinol cytochrome c reductase assembly protein
1772270_at	-0.321362	-0.346107	0.363095	0.121166	S. pombe SPCC736.09c /DEF=similar to translin-associated protein x
1779729_at	-0.0648397	-0.237719	0.403029	0.0613763	S. pombe SPAC1952.07 /GEN=rad1 /DEF=involved in DNA repair (PMID 7254221)
1769498_at	0.00838693	-0.0507072	0.176209	-0.0264826	S. pombe SPAC8F11.03 /GEN=swi4 /DEF=MutS family
1779954_at	-0.0116933	-0.0517168	-1.68569	0.0965274	S. pombe SPCPB1C11.02 /DEF=amino acid permease family (predicted)
1769316_s_at	-0.0336192	-0.425156	0.170469	1.07126	S. pombe SPAC750.05c /DEF=telomeric duplication
1778318_at	-0.0855729	0.0601775	-0.216466	0.030742	S. pombe SPAC14C4.14 /GEN=atp1 /DEF=F1-ATPase alpha subunit (PMID 1824697)
1772118_at	0.0592782	0.0406218	-0.329927	0.0131016	S. pombe SPBC32F12.09 /GEN=rum1 /DEF=CDK inhibitor
1771071_at	-0.190357	-0.104628	0.396948	0.313096	S. pombe SPBC18E5.15 /DEF=pseudogene
1770969_at	-0.0323458	-0.0757748	-0.780928	0.0996714	S. pombe SPAC13C5.05c /DEF=N-acetylglucosamine-phosphate mutase (putative)
1772918_at	-0.108113	0.131986	-0.517047	0.0478729	S. pombe SPBC16H5.12c /DEF=calcineurin-like phosphoesterase (Pfam)
1776738_at	-0.00780678	0.0179612	0.132467	-0.0232032	S. pombe SPAC13F5.01c /GEN=msh1 /DEF=MutS family
1774884_at	0.00236988	0.135079	-0.194158	0.782709	S. pombe SPAC1399.05c /DEF=zinc finger protein
1772434_at	0.0960204	0.237361	-0.194184	-0.198356	S. pombe SPBC13E7.03c /DEF=SAM domain (sterile alpha motif)
1770389_at	-0.0974814	-0.105828	0.421968	0.074275	S. pombe SPAC1F12.08 /DEF=cytidylyltransferase (predicted)
1775841_at	0.233854	-0.125745	0.403369	-0.271516	S. pombe SPBC18H10.04c /GEN=sce3 /DEF=translation initiation factor
1777333_at	-0.0702391	0.104387	-0.302435	0.005476	S. pombe SPBC577.14c /GEN=spa1 /DEF=ornithine decarboxylase antizyme (PMID 9769097)
1770504_at	0.0619542	-0.187915	0.302507	-0.00787067	S. pombe SPCC1223.14 /DEF=chorismate synthase (predicted)
1777965_at	0.157826	-0.159775	0.0366891	-0.0781889	S. pombe SPAC2G11.12 /GEN=hus2 /DEF=RecQ type DNA helicase
1771146_at	-0.320799	0.173149	-0.174006	0.29475	S. pombe SPBC685.05 /DEF=phosphatidylinositol N-acetylglucosaminyltransferase subunit H (predicted)
1772124_at	-0.315066	0.187489	-0.614776	0.0417865	S. pombe SPAC9E9.11 /GEN=plr1 /DEF=pyridoxal reductase (PMID 10438489)
1776222_at	-0.00883897	-0.198684	0.19685	-0.00549253	S. pombe SPAC227.05 /DEF=prefoldin (subunit 4)
1771122_at	-0.105569	0.164915	-0.353206	0.0226838	S. pombe SPAC24H6.08 /DEF=sequence orphan
1779293_at	-0.0363626	0.00889079	0.18437	-0.0931412	S. pombe SPCC613.02 /DEF=transporter
1774281_at	0.0951659	-0.0452102	-0.0378294	0.0911945	S. pombe SPBC29A10.12 /DEF=conserved eukaryotic protein
1772843_at	0.0590779	-0.139752	0.0696735	-0.0212425	S. pombe SPBC21C3.06 /DEF=sequence orphan
1780039_at	0.260905	-0.0812343	0.256718	-0.386814	S. pombe SPAC26H5.13c /DEF=hypothetical protein
1774569_at	0.0951173	0.107871	-0.026385	0.00718848	S. pombe SPCC70.09c /DEF=conserved fungal protein
1769489_at	0.237805	-0.134265	0.377991	-0.1632	S. pombe SPCC1020.04c /GEN=rpb6 /DEF=DNA-directed RNA polymerase (I, II, and III subunit)
1771665_at	0.0794506	0.0119499	0.41598	-0.102065	S. pombe SPCC965.13 /DEF=transporter
1777073_at	0.0307175	0.0383552	0.0175365	-0.0206833	S. pombe SPBC16A3.01 /GEN=spn3 /DEF=septin (predicted)
1779518_at	0.0289262	-0.075737	0.281799	-0.124564	S. pombe SPBC3B9.03 /DEF=GTP binding
1776784_at	0.176182	-0.436389	0.397771	-0.171563	S. pombe SPAC4F10.06 /DEF=hypothetical protein
1778864_at	-0.0199973	-0.00130971	0.190526	-0.0680927	S. pombe SPAC23C11.07 /DEF=sequence orphan
1770608_at	-0.0707846	-0.106272	0.133393	-0.0031786	S. pombe SPAC9G1.13c /DEF=Myb family
1773133_at	-0.29943	1.45059	-1.25989	0.122298	S. pombe SPAC27D7.09c /DEF=predicted N-terminal signal sequence
1774104_s_at	-0.688243	0.754348	-0.664932	0.478385	S. pombe SPAC27D7.09c /DEF=predicted N-terminal signal sequence
1776106_at	-0.0672925	-0.100494	0.207554	-0.00367069	S. pombe SPBC30D10.12c /GEN=rsm27 /DEF=mitochondrial ribosomal protein subunit s27
1772332_at	0.106459	-0.0677366	0.176354	-0.288393	S. pombe SPAC10F6.03c /DEF=CTP synthase (predicted)
1778786_at	0.148702	0.0826238	0.0542475	-0.220064	S. pombe SPAC343.09 /DEF=UBX domain
1774831_at	-0.0775143	0.126709	-0.128245	0.0744197	S. pombe SPCC4G3.04c /GEN=coq5 /DEF=C-methytransferase (predicted)
1776074_at	-0.0122414	-0.0917476	0.0814565	0.51366	S. pombe SPAC22G7.07c /DEF=adenosine-methyltransferase S-adenosylmethionine-binding subunit
1776247_at	0.0930589	-0.192718	0.318697	-0.0444886	S. pombe SPAC1782.11 /DEF=adenosine-5-phosphosulfate 3-phosphotransferase (adenylylsulfate kinase) (predicted)
1779352_at	-0.192012	0.126596	-0.0833724	0.123612	S. pombe SPAC13G7.07 /DEF=sequence orphan
1774013_at	-0.0743583	-0.096	0.0784626	0.0693947	S. pombe SPAC17H9.09c /GEN=ras1 /DEF=GTPase
1773067_at	0.0247367	-0.118202	0.251514	-0.00881195	S. pombe SPBC3F6.01c /DEF=serinethreonine protein phosphatase (predicted)
1774680_at	0.106164	-0.120773	0.355521	-0.0292451	S. pombe SPAC22H10.08 /DEF=hypothetical protein
1778489_at	0.0621157	0.0196505	-0.121082	-0.00478872	S. pombe SPBC146.13c /GEN=myo1 /DEF=myosin (type I)
1774735_at	-0.0178595	0.398767	-0.168106	0.089845	S. pombe SPBC887.09c /DEF=leucine-rich repeat protein
1775888_at	-0.143245	-0.0263399	0.00768344	0.0593573	S. pombe SPBC12C2.13c /GEN=fnx1 /DEF=MFS multidrug efflux transporter
1771178_at	-0.140847	0.165414	-0.776572	0.0372184	S. pombe SPAC630.04c /DEF=dubious
1773024_at	0.0696052	0.0369377	-0.0274846	-0.089989	S. pombe SPAC21E11.08 /GEN=lcb2 /DEF=serine palmitoyltransferase (PMID 8921873) (predicted)
1769605_at	-0.0261148	0.0269213	-0.115628	0.0182238	S. pombe SPAC8E11.02c /GEN=rad24 /DEF=involved in DNA repair
1773374_at	0.0661815	-0.181126	0.209616	-0.0913153	S. pombe SPBC1539.08 /DEF=ADP-ribosylation factor (predicted)
1772480_at	0.112187	-0.0229893	-0.066253	-0.0492179	S. pombe SPAC1687.15 /GEN=gsk3 /DEF=serinethreonine protein kinase
1770153_at	-0.267029	0.000324567	0.0468076	0.395385	S. pombe SPAC17A5.11 /GEN=rec12 /DEF=Spo11Top6A topoisomerase family (PMID 12437782)
1771774_at	0.0693591	-0.117762	0.213399	-0.0829198	S. pombe SPAC823.15 /GEN=ppa1 /DEF=serinethreonine protein phosphatase (minor) (catalytic subunit)
1778242_at	-0.29471	0.227973	-0.606785	0.165309	S. pombe SPBP35G2.11c /DEF=zinc finger protein
1772037_at	-0.0666323	-0.0225709	-0.0370547	0.175694	S. pombe SPBC1271.14 /DEF=glutamate N-acetyltransferase (predicted)
1770663_at	0.0697479	-0.288664	0.413952	-0.0546958	S. pombe SPBC418.02 /DEF=N-acetyltransferase complex (putative)
1779022_at	-0.0178213	-0.0533867	0.0509675	-0.0053126	S. pombe SPBC15D4.10c /DEF=zinc finger protein
1778926_at	-0.115854	0.344411	-0.14388	0.175315	S. pombe SPAC3G6.05 /DEF=Mvp17PMP22 family
1779788_at	-0.0439183	0.0696996	0.0206579	-0.0996475	S. pombe SPAC1093.03 /DEF=polyphosphoinositide phosphatase activity (predicted)
1775438_at	-0.0416352	-0.0487464	0.0568482	0.0970583	S. pombe SPCC18B5.09c /DEF=dubious
1769491_at	0.0184342	-0.065711	-0.0418924	0.155664	S. pombe SPBC17G9.06c /DEF=acetyltransferase (predicted)
1779592_at	0.00190671	0.057923	-0.0297702	-0.162117	S. pombe SPAC1006.03c /DEF=hypothetical protein
1776112_at	-0.0840899	-0.0762291	-0.0252844	0.453523	S. pombe SPBC1683.13c /DEF=transcriptional regulator (predicted)
1777914_at	0.142766	-0.0253903	0.0411952	-0.226022	S. pombe SPAC22G7.02 /GEN=kap111 /DEF=karyopherin
1775232_at	-0.00427024	0.145121	-0.0547841	-0.0353184	S. pombe SPAPYUG7.02c /GEN=sin1 /DEF=stress activated map kinase interacting protein
1777354_at	-0.00900841	-0.0744511	0.215357	0.0362434	S. pombe SPAC664.14 /DEF=Amt ammonium transporter
1770823_at	-0.288683	0.131032	-0.314882	0.218059	S. pombe SPAC29E6.08 /GEN=tbp1 /DEF=TATA-binding protein (TBP)
1773704_at	-0.0507574	-0.0496213	-0.264874	0.117819	S. pombe SPAC17C9.12 /DEF=MSP domain
1776723_at	-0.0849832	-0.0064338	-0.0263227	0.0934772	S. pombe SPBC409.16c /DEF=dubious
1775972_at	0.0790421	-0.0203543	0.056503	-0.368204	S. pombe SPBC18H10.02 /GEN=lcf1 /DEF=long-chain-fatty-acid-CoA ligase activity (predicted)
1771256_at	0.0158993	-0.0570189	0.0289631	-0.0306988	S. pombe SPAC8C9.08 /GEN=rps5 /DEF=40S ribosomal protein S5
1778413_s_at	0.0084397	-0.0184164	0.0111465	-0.00526079	S. pombe SPAC8C9.08 /GEN=rps5 /DEF=40S ribosomal protein S5
1779953_at	0.0681458	-0.108565	-0.242893	0.0823806	S. pombe SPBC16E9.02c /DEF=CUE domain protein
1771336_at	-0.0874027	-0.33688	0.132375	0.0485942	S. pombe SPAC1002.01 /DEF=conserved fungal protein
1779311_at	-0.192547	0.0545696	-0.229834	0.138998	S. pombe SPBC25H2.09 /DEF=sequence orphan
1775171_at	0.10841	-0.063783	0.0955327	-0.0954835	S. pombe SPCC285.08 /GEN=ret2 /DEF=coatomer (delta subunit) (putative)
1775145_at	0.0902611	0.161142	-0.185542	-0.0309928	S. pombe SPAC24B11.06c /GEN=sty1 /DEF=serinethreonine protein kinase
1774741_at	-0.106118	0.0228081	-0.145126	0.060489	S. pombe SPAC2C4.10c /DEF=sequence orphan
1770972_at	0.129097	-0.0404606	0.288685	-0.420597	S. pombe SPAC26F1.05 /DEF=sequence orphan
1778676_at	-0.737879	0.267972	-0.759813	2.18549	S. pombe SPBC1683.06c /DEF=inosine-uridine preferring nucleoside hydrolase (predicted)
1779975_at	0.0836112	0.417872	-0.258576	-0.0287441	S. pombe SPAC2E12.02 /GEN=hsf1 /DEF=transcriptional activator
1776569_at	0.181438	-0.150527	0.403128	-0.212063	S. pombe SPAC17C9.02c /GEN=lys7 /DEF=alpha-aminoadipate reductase-phosphopantetheinyl transferase (predicted)
1775773_at	-0.0676397	-0.337696	0.174211	0.0177711	S. pombe SPBC1348.14c /DEF=hexose transporter (predicted)
1770815_at	0.100404	-0.0832599	0.333791	-0.0714451	S. pombe SPCC1020.11c /DEF=conserved eukaryotic protein
1778873_at	0.0873432	0.0258745	-0.0834983	0.0179742	S. pombe SPCC338.15 /DEF=dolichyl-di-phosphooligosaccharide-protein glycotransferase subunit (predicted)
1771226_at	0.0504627	0.137995	-0.115712	-0.0627343	S. pombe SPCC1393.02c /DEF=hypothetical protein
1777038_at	0.00356134	-0.0329351	0.0223783	0.000460625	S. pombe SPAC19B12.04 /GEN=rps3001 /DEF=40S ribosomal protein S30
1771866_x_at	0.0038468	-0.0534385	0.0337197	-0.000952403	S. pombe SPAC19B12.04 /GEN=rps3001 /DEF=40S ribosomal protein S30
1777330_at	0.0957947	0.00662645	0.0061086	-0.0324418	S. pombe SPCC962.06c /GEN=bpb1 /DEF=zinc finger protein
1776398_at	-0.0194251	0.035332	-0.0227985	0.0416924	S. pombe SPCC13B11.01 /GEN=adh1 /DEF=alcohol dehydrogenase
1778148_at	0.00323296	0.0549631	-0.0993834	-0.0317774	S. pombe SPAC14C4.05c /DEF=hypothetical protein
1777471_at	0.0989154	0.109119	-0.0525668	-0.119227	S. pombe SPCC965.05c /GEN=thp1 /DEF=uracil DNA N-glycosylase activity (IDA) (PMID 12711670)
1773689_at	0.0304794	-0.177097	0.210996	0.0285314	S. pombe SPBC839.08c /DEF=phosphatidylinositol glycan, class N (predicted)
1772378_at	0.112145	-0.0588547	0.0973314	-0.260391	S. pombe SPBC17D1.04 /DEF=hypothetical protein
1777176_at	0.0318425	0.0686404	-0.14549	-0.0123711	S. pombe SPAC1805.01c /DEF=serinethreonine protein kinase (predicted)
1774836_at	0.213122	-0.110929	0.014143	-0.0503079	S. pombe SPAC12B10.14c /DEF=serinethreonine protein kinase (predicted)
1780212_at	0.043822	-0.0274649	0.0669085	-0.0295328	S. pombe SPBC25H2.05 /DEF=nascent polypeptide-associated complex (alpha subunit) (predicted)
1776851_at	-0.140591	-0.1225	0.182672	0.00268078	S. pombe SPAPB1A10.11c /DEF=glutamyl-tRNA synthetase (predicted)
1769911_at	0.0713237	-0.121368	0.236789	-0.14146	S. pombe SPBC651.10 /DEF=hypothetical protein
1771115_at	-0.00138378	0.0997922	-0.0660117	0.0252498	S. pombe SPAC607.07c /DEF=hypothetical protein
1770810_at	-0.102554	-0.202813	0.183113	0.0720085	S. pombe SPCC1620.13 /DEF=phosphoglycerate mutase family
1776945_at	0.00767008	3.05176e-05	0.596751	-0.132418	S. pombe SPAC19B12.11c /DEF=zinc finger protein
1778875_at	-0.52229	0.30513	-1.67645	0.261562	S. pombe SPCC191.01 /DEF=sequence orphan
1774228_at	0.20155	-0.0107937	-0.0707111	-0.0640933	S. pombe SPAC24C9.04 /DEF=hypothetical protein
1773763_at	-0.101283	-0.371829	0.109872	0.104827	S. pombe SPCC11E10.09c /DEF=alpha-amylase (predicted)
1771625_at	0.217263	0.11708	-0.105376	-0.195729	S. pombe SPBC8D2.14c /GEN=sed5 /DEF=SNARE (predicted)
1775205_at	0.186917	0.0435705	-0.220246	-0.0630738	S. pombe SPCC4F11.03c /DEF=hypothetical protein
1774431_at	0.0219895	0.082586	-0.621884	-0.0456473	S. pombe SPAC1006.05c /GEN=och1 /DEF=alpha-1,6-mannosyltransferase (PMID 11231017)
1779731_at	0.113237	-0.0949774	0.209764	-0.0782232	S. pombe SPBPB2B2.08 /DEF=sequence orphan
1775093_at	0.016118	-0.0758448	0.00450675	0.25893	S. pombe SPAC140.04 /DEF=hypothetical protein
1775798_at	-0.132421	0.0634699	-0.168577	0.0971158	S. pombe SPBC8D2.12c /DEF=conserved protein
1776726_at	-0.00286674	0.0268701	0.101875	-0.077076	S. pombe SPAC9E9.14 /GEN=vps24 /DEF=SNF7 family
1777297_at	-0.0374889	-0.0517	0.0103102	0.0167303	S. pombe SPBC1347.04 /GEN=tim54 /DEF=TIM22 inner membrane protein import complex
1769714_at	-0.293039	0.142411	-0.869815	0.329525	S. pombe SPAC1687.14c /DEF=EF hand
1771394_at	0.0780904	0.0217648	0.194272	-0.115003	S. pombe SPAC3F10.05c /DEF=sequence orphan
1776242_at	-0.124266	0.225362	-0.338009	0.0948817	S. pombe SPBC15D4.07c /GEN=apg9 /DEF=involved in autophagy (predicted)
1769999_at	0.238029	-0.0651328	0.25955	-0.324915	S. pombe SPBC3B8.09 /DEF=ribonucleoprotein (RNP) complex (predicted) (PMID 12068309)
1777789_at	0.00137266	-0.0343571	-0.106604	-0.028539	S. pombe SPCC13B11.04c /DEF=glutathione-dependent formaldehyde dehydrogenase (predicted)
1772664_at	-0.0731916	-0.146129	0.0704953	0.0233955	S. pombe SPCC126.04c /DEF=hypothetical protein
1779430_at	0.0245816	0.0269715	-0.0530837	0.0270306	S. pombe SPAC2F3.10 /DEF=GARP complex (predicted)
1771357_at	-0.0824715	0.226458	-0.325778	0.0574827	S. pombe SPAC16E8.13 /DEF=zinc finger protein
1775455_at	-0.175457	0.198002	-0.594808	0.100368	S. pombe SPAC29B12.11c /DEF=orthologue of human WW domain binding protein-2
1778543_at	-0.0250845	0.0748914	0.0136372	-0.1067	S. pombe SPBC20F10.10 /DEF=cyclin
1773324_at	-0.0348463	-0.303211	0.238978	0.0382252	S. pombe SPBC1778.07 /DEF=methyltransferase (predicted)
1774704_at	0.0804071	0.0254421	-0.0639079	-0.0736844	S. pombe SPBC800.09 /GEN=sum2 /DEF=involved in G2M transition checkpoint (required) (PMID 9832516)
1770830_at	0.213135	-0.216305	0.724291	-0.158468	S. pombe SPCC290.02 /GEN=rpc34 /DEF=localization DNA-directed RNA polymerase III complex (subunit)
1775291_at	0.117526	-0.141335	0.127102	-0.326757	S. pombe SPCC364.06 /DEF=involved in nucleosome assembly (predicted)
1769414_at	0.105669	-0.0586414	-0.0667435	-0.0179593	S. pombe SPAC31F12.01 /DEF=zds family
1776057_at	-0.235323	0.190665	-0.217165	0.164062	S. pombe SPBC2D10.20 /GEN=ubc1 /DEF=ubiquitin conjugating enzyme
1779463_at	-0.285793	-0.120241	0.065012	0.109282	S. pombe SPBC1709.20 /DEF=RNase P and RNase MRP subunit
1775840_at	0.0284964	-0.35807	0.0744715	-0.0431617	S. pombe SPAC19G12.06c /GEN=hta2 /DEF=histone H2A (beta)
1776521_at	0.218445	-0.0360575	0.344726	-0.148793	S. pombe SPBP8B7.10c /DEF=hypothetical protein
1771342_at	-0.32303	0.0916271	-0.219937	0.176813	S. pombe SPAC607.06c /DEF=metallopeptidase
1773551_at	0.0588646	-0.0328229	0.13076	-0.0682487	S. pombe SPBP8B7.17c /DEF=TENATHI domain
1775827_at	0.0167398	0.0222406	-0.169882	-0.127485	S. pombe SPCC1620.12c /DEF=GTPase activating protein (predicted)
1769970_at	0.155563	-0.0180521	0.0198272	-0.0415649	S. pombe SPBC27B12.12c /DEF=metal ion transporter (predicted)
1770103_at	0.0192808	0.148416	-0.136465	0.0270723	S. pombe SPCC550.09 /DEF=pex24 family
1770989_at	0.116602	-0.399397	0.292566	-0.0807921	S. pombe SPCC553.07c /DEF=translesion DNA repair polymerase (predicted)
1778559_at	0.346215	-0.194559	0.712417	-0.323176	S. pombe SPBC1711.07 /DEF=WD repeat protein
1778028_at	-0.0871967	-0.233751	0.359428	0.00312424	S. pombe SPCC777.11 /DEF=sequence orphan
1777619_at	-0.0700792	0.0359542	-0.0268021	0.0368764	S. pombe SPCC24B10.10c /DEF=AAA family ATPase
1780020_at	0.0159947	-0.0391677	0.0182381	-0.00293287	S. pombe SPBC1685.09 /GEN=rps29 /DEF=40S ribosomal protein S29
1776259_at	-0.643047	0.558	-1.35956	0.266956	S. pombe SPBC215.11c /DEF=aldoketo reductase
1771021_at	0.224793	0.0182025	0.0132898	-0.148033	S. pombe SPAC6F12.11c /GEN=sfc1 /DEF=transcription factor
1774198_at	0.117846	-0.0825704	0.319767	-0.166036	S. pombe SPBC211.04c /GEN=mcm6 /DEF=MCM complex subunit (PMID 9366552)
1779530_at	0.00114981	-0.0240911	0.175995	0.0200863	S. pombe SPAC22G7.04 /GEN=ubp13 /DEF=WD repeat protein (SMART)
1775723_at	0.128613	-0.08863	0.110895	-0.138196	S. pombe SPAC29E6.02 /GEN=prp3 /DEF=U4U6 x U5 tri-snRNP complex (predicted)
1777326_at	0.0886822	-0.17906	0.0720504	-0.139442	S. pombe SPCC18.11c /GEN=sdc1 /DEF=SET1 complex (TAP) (PMID 12488447)
1778394_at	-0.174165	0.063007	0.0755275	0.0398108	S. pombe SPBC14C8.11c /DEF=sequence orphan
1771456_at	-0.0132128	-0.251958	0.466056	0.0315183	S. pombe SPAC3A11.03 /DEF=methyltransferase (predicted)
1770061_at	0.0485446	-0.036713	0.022418	-0.0119282	S. pombe SPAC57A10.04 /DEF=sequence orphan
1775404_at	0.0265446	0.234887	-0.376528	0.00647163	S. pombe SPAC17G8.14c /GEN=pck1 /DEF=serinethreonine protein kinase
1777229_at	-0.171797	0.217079	-0.450398	0.069128	S. pombe SPBC216.04c /DEF=methionine sulfoxide (predicted) (PMID 11929995)
1771259_at	-0.361962	-0.171885	0.97597	0.0813882	S. pombe SPMIT.10 /GEN=atp9 /DEF=ATPase (subunit 9)
1774244_at	0.0221033	-0.0893218	-0.000203768	-0.0243286	S. pombe SPAC589.10c /DEF=ubiquitin family protein
1778972_s_at	0.0203616	-0.0283855	-0.0187511	0.0158828	S. pombe SPAC589.10c /DEF=ubiquitin family protein
1772799_at	-0.0415014	-0.0825116	0.111903	0.0649357	S. pombe SPBC1711.09c /DEF=hypothetical protein
1773111_at	-0.195977	-0.327552	0.104321	0.240463	S. pombe SPAC5H10.11 /GEN=gmh1 /DEF=galactosyltransferase
1779361_at	-0.269332	0.120709	-0.616614	0.0506458	S. pombe SPBC26H8.12 /DEF=cytochrome c heme lyase (predicted)
1778258_at	-0.456174	0.909195	-0.823407	0.229472	S. pombe SPAC13C5.04 /DEF=glutamine amidotransferase (predicted)
1775784_at	0.0114317	0.045427	-0.250912	0.0063467	S. pombe SPCC1739.01 /DEF=zinc finger protein
1771938_at	-0.186968	0.191377	-0.491882	0.196218	S. pombe SPAC23C4.16c /DEF=lipase (predicted)
1779730_at	0.2434	-0.210786	0.395013	-0.276674	S. pombe SPBC713.10 /GEN=tim16 /DEF=TIM23 translocase complex
1770801_at	0.0332785	0.178795	-0.0908801	-0.0297407	S. pombe SPBC29A10.11c /GEN=vps902 /DEF=guanyl-nucleotide exchange factor activity (predicted)
1774562_at	0.0125812	-0.000957171	0.182747	-0.139901	S. pombe SPCC962.02c /GEN=cut17 /DEF=survivin
1771605_at	0.0917927	-0.141569	0.489484	-0.0060943	S. pombe SPAC630.10 /DEF=conserved fungal protein
1778234_at	-0.501126	0.0458221	0.0506442	1.01908	S. pombe SPCC285.05 /DEF=conserved protein
1776890_at	0.0362422	0.0106955	0.0674925	-0.0835845	S. pombe SPCC622.01c /DEF=sequence orphan
1773351_at	0.0475334	-0.0280781	0.252519	-0.307993	S. pombe SPAC22E12.08 /GEN=rrn10 /DEF=RNA polymerase I upstream activation factor complex
1773428_at	0.165896	-0.0696316	0.618415	-0.127867	S. pombe SPBC28E12.04 /DEF=hypothetical protein
1778690_at	0.0596924	-0.184839	0.275961	-0.0584068	S. pombe SPAC17G8.06c /DEF=dihydroxy-acid dehydratase
1772698_at	0.0462488	0.0233285	0.000169436	-0.151808	S. pombe SPBC2G2.11 /DEF=glycylpeptide N-tetradecanoyltransferase (predicted)
1771663_at	-0.0804094	-0.133927	0.0585874	-0.0934683	S. pombe SPBC16G5.17 /DEF=transcriptional regulator (predicted)
1770563_at	-0.0352872	0.216516	-0.0323915	-0.0374355	S. pombe SPBC725.08 /DEF=transcription factor (predicted)
1770242_at	-0.226318	0.300737	-0.205017	0.217587	S. pombe SPBC776.05 /DEF=transporter (predicted)
1775377_at	0.0872965	0.0744642	-0.0183023	-0.186273	S. pombe SPBC119.11c /GEN=pac1 /DEF=5 endonuclease
1777741_at	-0.281109	-0.367021	0.266036	0.709593	S. pombe SPCC965.12 /DEF=dipeptidase (predicted)
1779259_at	0.102627	-0.0526892	0.0885642	-0.0628916	S. pombe SPAC13G7.05 /DEF=acyl-coA-sterol acyltransferase (predicted)
1771121_at	-0.0210813	0.00516574	-0.0625445	0.110521	S. pombe SPAC11D3.08c /DEF=amino acid permease family
1775616_at	-0.307287	0.208626	-0.236317	0.14865	S. pombe SPAC30D11.01c /DEF=alpha-glucosidase
1774827_at	0.0293204	0.0717802	-0.0605284	-0.233723	S. pombe SPAC30D11.04c /GEN=nup124 /DEF=nucleoporin
1770396_at	0.00231044	-0.01126	0.0138699	0.00726604	S. pombe SPBC56F2.12 /GEN=ilv5 /DEF=acetohydroxyacid reductoisomerase
1779778_at	-0.00135422	0.00180689	0.0571852	-0.0954727	S. pombe SPAC1002.03c /DEF=glycosyl hydrolase family 31
1779471_at	-0.00647704	0.00938066	-0.0670547	0.0499916	S. pombe SPAPB2B4.05 /GEN=vma5 /DEF=vacuolar ATP synthase (subunit C) (predicted)
1771785_at	-0.0583547	0.0500873	-0.134106	0.0548751	S. pombe SPBC31F10.15c /GEN=atp15 /DEF=F0-ATPase epsilon subunit
1775895_at	-0.156658	-0.329	0.280409	0.0745659	S. pombe SPAC22H10.10 /GEN=alp21 /DEF=LRR domain
1779957_at	0.0278358	-0.0621007	0.034489	-0.0257924	S. pombe SPBC17G9.07 /GEN=rps2402 /DEF=40S ribosomal protein S24
1773502_at	0.175306	-0.513368	-0.812658	0.283622	S. pombe SPAC4G9.07 /GEN=B8647-3 /DEF=possibly S. pombe specific
1779739_at	-0.00596619	0.105618	-0.132363	-0.0392927	S. pombe SPAC1F12.09 /DEF=GPI-anchor transamidase complex (predicted)
1775650_s_at	-0.212464	-0.060641	0.405014	-0.196821	S. pombe SPAC1F12.03c /DEF=sequence orphan
1770285_at	0.054198	-0.038592	0.0261933	-0.113558	S. pombe SPAC23H4.03c /GEN=erv25 /DEF=COPII-coated vesicle component (predicted)
1777523_at	0.1068	0.0694078	-0.265855	-0.0171874	S. pombe SPAC2F7.16c /DEF=phospholipase D (predicted)
1775543_at	0.220701	-0.168251	0.695126	-0.104786	S. pombe SPAC23C4.17 /DEF=tRNA methyltransferase (predicted)
1779282_at	-0.0995102	0.109149	-0.159048	0.224576	S. pombe SPCC965.04c /DEF=AAA family ATPase
1778448_at	-0.092941	-0.0314624	0.00640933	0.0723801	S. pombe SPBC1706.01 /GEN=tea4 /DEF=src (SH3) homology domain
1771646_at	-0.0418838	0.319074	-0.491387	0.0795962	S. pombe SPCC24B10.07 /GEN=gad8 /DEF=serinethreonine protein kinase (PMID 12805221)
1779648_at	0.173981	-0.0226727	0.136791	-0.237288	S. pombe SPCC553.10 /DEF=glycoprotein (predicted)
1780241_at	0.0350685	-0.276177	0.0262349	0.197362	S. pombe SPCC777.17c /DEF=mitochondrial ribosomal protein (predicted)
1776900_at	-0.665554	0.628449	-1.97895	0.404607	S. pombe SPAC15E1.02c /DEF=sequence orphan
1777023_at	0.01581	-0.0254545	0.0288932	0.000124931	S. pombe SPBC1921.02 /GEN=rad60 /DEF=involved in DNA repair (PMID 11971984)
1773481_at	-0.030887	-0.102335	0.214391	-0.00271448	S. pombe SPBC887.13c /DEF=3-oxoacyl-(acyl-carrier-protein)-synthase (putative)
1773526_at	0.185487	-0.0926212	0.474906	-0.29143	S. pombe SPBC713.04c /DEF=WD repeat protein
1774640_at	-0.0593519	-0.423712	0.351164	-0.0905536	S. pombe SPBC16G5.13 /DEF=dubious
1780205_at	-0.0175498	0.0733108	0.0153875	0.00716368	S. pombe SPBC365.09c /DEF=transcription factor (predicted)
1773991_at	0.334033	-0.919682	0.371977	-0.449658	S. pombe SPCC18.01c /GEN=adg3 /DEF=beta-glucosidase (predicted)
1777976_at	0.0866623	-0.0553872	0.0380278	-0.0790552	S. pombe SPBC14C8.03 /DEF=methionine metallopeptidase (predicted)
1777557_at	-0.057415	0.012798	0.563321	-0.0582155	S. pombe SPBC2F12.11c /GEN=rep2 /DEF=transcription factor
1773452_at	0.191296	-0.497182	0.169313	-0.170115	S. pombe SPBC26H8.06 /GEN=grx5 /DEF=arsenate reductase (glutaredoxin) activity (predicted)
1772303_at	-0.167899	0.0648969	0.328541	-0.104133	S. pombe SPBC336.05c /DEF=conserved eukaryotic protein
1775299_at	0.0489685	-0.182288	0.16893	-0.0650738	S. pombe SPBC32H8.06 /DEF=TPR repeat protein
1774483_at	-0.218836	0.33403	-0.160155	0.0932789	S. pombe SPBC29A3.08 /GEN=pof4 /DEF=F-box protein
1770138_at	-0.0187085	0.0135552	0.02631	-0.180766	S. pombe SPAC4F10.13c /DEF=GYF domain
1773742_at	0.000576337	0.197915	-0.268892	0.135669	S. pombe SPAC821.04c /GEN=cid13 /DEF=poly(A) polymerase (PMID 12062100)
1771941_at	-0.0569528	-0.0103957	0.325118	-0.165981	S. pombe SPAC24C9.11 /DEF=MIF4G domain
1776822_at	0.0572281	0.118092	-0.235848	-0.0130234	S. pombe SPCC18B5.03 /GEN=wee1 /DEF=serinethreonine protein kinase
1773448_at	-0.177249	0.0802313	-0.334411	0.156937	S. pombe SPAC4G9.13c /GEN=vps26 /DEF=retromer complex (predicted)
1770999_at	-0.0279026	-0.293442	0.405487	-0.0448389	S. pombe SPAC4C5.04 /GEN=rad31 /DEF=ubiquitin activating enzyme (PMID 9092625)
1774821_at	-0.105643	0.145776	-0.475825	0.0519667	S. pombe SPBC11B10.07c /DEF=CDC50 domain protein
1773243_at	0.0273914	0.000920296	0.0984983	-0.183189	S. pombe SPBC902.03 /DEF=involved in meiosis (predicted)
1773847_at	0.0826483	-0.106229	0.101967	-0.0705411	S. pombe SPAC13A11.02c /GEN=cyp51 /DEF=cytochrome p450 51 (predicted)
1774242_at	0.00180817	-0.0204296	-0.00774511	0.0299657	S. pombe SPAC3F10.18c /GEN=rpl4102 /DEF=60S ribosomal protein L41
1770586_at	-0.270515	-0.206196	0.0947711	0.140618	S. pombe SPBC23G7.14 /DEF=sequence orphan
1770246_at	0.184379	-0.0377041	0.263694	-0.343415	S. pombe SPAC959.03c /DEF=ribonucleoprotein (RNP) complex (predicted) (PMID 12068309)
1778137_s_at	0.0512918	-0.0678177	0.385231	-0.0466375	S. pombe SPBCPT2R1.05c /DEF=pseudogene
1776513_at	0.0256268	-0.0436767	0.133187	-0.0965675	S. pombe SPBC23E6.07c /GEN=rfc1 /DEF=replication factor C complex
1778530_at	0.0155029	-0.0121425	0.332725	-0.222856	S. pombe SPAC22E12.18 /DEF=conserved fungal protein
1772725_at	-0.0436357	0.0553681	0.071112	-0.0986087	S. pombe SPAC144.06 /GEN=apl5 /DEF=AP-3 adaptor complex (predicted)
1777061_at	-0.0169338	-0.0215117	0.0176824	0.0811459	S. pombe SPBC8D2.04 /GEN=hht2 /DEF=histone H3
1772039_at	0.0749579	-0.110135	0.212305	-0.0819305	S. pombe SPCC16C4.19 /DEF=RNA-binding protein (predicted)
1770880_at	-0.0674175	0.192498	-0.141805	0.0908251	S. pombe SPAC2C4.08 /DEF=conserved yeast protein
1770772_at	0.290933	-1.08321	0.211942	-0.795701	S. pombe SPAP14E8.02 /DEF=hypothetical protein
1777911_at	-0.17197	0.31228	-0.672503	0.104842	S. pombe SPAP8A3.12c /DEF=tripeptidylpeptidase (predicted)
1778662_at	-0.0654634	0.106602	-0.0572297	0.05054	S. pombe SPAC17G8.03c /DEF=histone fold
1780019_at	0.0180635	-0.0154425	0.0104504	-0.0136293	S. pombe SPBC21C3.13 /GEN=rps1901 /DEF=40S ribosomal protein (S19.1S19A subunit)
1778438_at	0.0647205	0.0659968	-0.0416282	-0.0508944	S. pombe SPBC3F6.05 /GEN=rga1 /DEF=GTPase activating protein
1779363_at	-0.23781	0.0903579	-0.0372907	0.540944	S. pombe SPCC576.16c /GEN=wtf22 /DEF=wtf element
1773571_at	-0.00269286	0.0417312	-0.0361929	-0.0558802	S. pombe SPBC14C8.16c /GEN=bot1 /DEF=involved in growth site determination (AF352796 Catanuto P., David W., You M., Verde F. unpublished)
1774532_at	0.0351667	0.026845	0.0283979	-0.110751	S. pombe SPAC7D4.10 /GEN=vma13 /DEF=vacuolar ATP synthase (subunit H) (predicted)
1770007_at	-0.0802075	0.246838	-0.163729	0.0702791	S. pombe SPCC1281.07c /DEF=glutathione S-transferase (predicted)
1772773_at	0.0852753	-0.210755	0.341366	-0.0508989	S. pombe SPBC28E12.05 /DEF=rrm RNA recognition motif (inferred from context)
1775980_at	0.0528138	-0.00994396	0.153495	-0.157217	S. pombe SPBP22H7.06 /DEF=nicotinamide riboside kinase (predicted) (ISS)
1775733_at	-0.13296	-0.148125	0.232317	-0.0183058	S. pombe SPBC4B4.11 /DEF=hypothetical protein
1773458_at	0.210097	-0.47863	0.396029	-0.100326	S. pombe SPBC8E4.02c /DEF=hypothetical protein
1779834_at	0.0904814	-0.136379	0.466735	-0.379196	S. pombe SPAC14C4.12c /DEF=SWIRM domain
1774096_at	0.197223	-0.0693312	0.320781	-0.0867898	S. pombe SPBC1198.03c /DEF=hypothetical protein
1775272_at	-0.0525093	0.0468562	-0.0248817	0.0571823	S. pombe SPBC29A3.21 /DEF=dubious
1774395_at	-0.0771596	0.148528	-0.331844	0.0331764	S. pombe SPBC577.10 /DEF=20S proteasome component (beta 7)
1776746_at	-0.125517	0.581044	-0.427392	0.0549914	S. pombe SPAC4G9.19 /DEF=DNAJ domain protein
1775042_at	-0.0323747	-0.0593659	0.0809867	-0.0252266	S. pombe SPBC30D10.02 /DEF=transcriptional regulator (predicted)
1770688_at	-0.0221615	0.000236511	0.128894	-0.050058	S. pombe SPAC23D3.06c /GEN=nup146 /DEF=nucleoporin
1770826_at	-0.121203	0.0423743	-0.213537	0.292467	S. pombe SPBP16F5.04 /GEN=ubc3 /DEF=ubiquitin conjugating enzyme
1774350_at	-0.382064	0.202418	0.103319	1.17327	S. pombe SPAC19D5.07 /DEF=4-aminobutyrate aminotransferase (GABA transaminase) (predicted)
1780179_at	0.0263112	-0.00333659	0.0367222	0.00773875	S. pombe SPCC1235.05c /DEF=DEADDEAH box helicase
1769512_at	-0.0303653	-0.0256236	0.00805791	0.0223134	S. pombe SPBC660.12c /DEF=peptide epimerase (predicted)
1769989_at	0.233024	-0.110115	0.742408	-0.240251	S. pombe SPBC83.15 /DEF=WD repeat protein
1779651_at	0.150244	-0.150606	0.432202	-0.0481421	S. pombe SPAP7G5.02c /GEN=gua2 /DEF=GMP synthase (glutamine-hydrolyzing) (predicted)
1778710_at	-0.119397	0.0862935	0.000440915	0.0184937	S. pombe SPAC4A8.14 /GEN=prs1 /DEF=ribose-phosphate pyrophosphokinase
1775544_at	0.0675217	0.00580215	-0.226828	-0.0266841	S. pombe SPBC800.10c /DEF=actin cortical patch component (predicted)
1770673_at	-0.235861	0.165241	-0.261387	0.456028	S. pombe SPCC4B3.06c /DEF=NADPH-dependent FMN reductase (predicted)
1773905_at	0.0679862	0.00573476	0.159101	-0.264102	S. pombe SPBC12D12.05c /DEF=mitochondrial carrier
1778848_at	0.118123	-0.260666	0.300545	-0.220601	S. pombe SPAC8C9.07 /DEF=dubious
1777507_at	0.0876261	0.0094986	-0.173291	-0.081104	S. pombe SPAC19B12.03 /GEN=bgs3 /DEF=1,3-beta-glucan synthase (subunit) (PMID 12582133)
1769780_at	-0.133244	0.238659	-0.70714	0.143274	S. pombe SPBC1652.01 /DEF=hypothetical protein
1778895_at	-0.159483	-0.186508	0.075847	0.047272	S. pombe SPCC70.07c /GEN=tmp1 /DEF=thymidylate kinase (PMID 1327149)
1770934_at	0.259475	-0.103786	0.440811	-0.327677	S. pombe SPAC22F8.09 /DEF=conserved eukaryotic protein
1773830_at	0.0104179	-0.0854251	0.16317	-0.028478	S. pombe SPAC17A5.02c /GEN=dbr1 /DEF=RNA lariat debranching enzyme (PMID 9001235)
1776918_at	0.121956	-0.861607	0.747381	0.0439733	S. pombe SPAC5H10.06c /GEN=adh4 /DEF=alcohol dehydrogenase (PMID 15040954)
1778916_at	-0.119094	-0.182188	0.0635042	0.204381	S. pombe SPBC1709.16c /DEF=conserved protein (mainly bacterial fungal and plant)
1775595_at	0.0619243	0.0120331	-0.0398194	-0.0394363	S. pombe SPCC594.07c /DEF=sequence orphan
1779028_at	0.125663	-0.0887864	0.115737	-0.144629	S. pombe SPAC1071.06 /DEF=actin-like protein
1773471_at	-0.288023	0.169845	-0.745797	0.228065	S. pombe SPCC736.13 /DEF=short chain dehydrogenase
1774975_at	-0.0437752	0.170854	0.0512266	-0.177871	S. pombe SPAC13G6.03 /DEF=involved in glycosylphospatidylinositol modification (predicted)
1771558_at	-0.0927115	0.143575	0.0591453	-0.0985784	S. pombe SPCC962.05 /DEF=sequence orphan
1770965_at	-0.182606	-0.00491969	-0.168364	0.273961	S. pombe SPBC947.05c /DEF=ferric-chelate reductase activity (predicted)
1779901_at	-0.0298704	-0.163317	0.297493	0.137569	S. pombe SPAPB1A10.14 /DEF=F-box protein (context dependent)
1778424_at	0.133924	-0.0900873	0.463339	-0.0573508	S. pombe SPBC887.03c /DEF=HEAT repeat (ISS) (PMID 14970380)
1779974_at	-0.0311893	0.0072298	0.0446421	0.0367835	S. pombe SPCC1235.09 /DEF=WD repeat protein
1770601_at	-0.384699	0.854552	-1.02013	0.362028	S. pombe SPCC1393.12 /DEF=sequence orphan
1776824_at	0.0261087	0.012359	-0.0143897	0.0148354	S. pombe SPBC428.14 /DEF=acetyltransferase
1778708_at	0.0725975	-0.00350444	0.050134	-0.134959	S. pombe SPBC21D10.10 /DEF=bromodomain protein
1775461_at	0.00015831	-0.0367467	0.0128269	-0.0126581	S. pombe SPCC576.11 /GEN=rpl15 /DEF=60S ribosomal protein L15
1772155_at	0.239922	0.153831	0.115051	-0.556084	S. pombe SPAC11D3.13 /DEF=ThiJ domain
1769393_at	0.129509	-0.18492	-0.559401	0.711282	S. pombe SPAC1039.07c /DEF=aminotransferase class-III pyridoxal-phosphate
1778126_at	-0.0487754	-0.0701799	0.0374149	0.0376746	S. pombe SPCC1183.02 /DEF=glutathione S-transferase (predicted)
1778058_at	0.0216904	0.0555827	-0.0944389	-0.151309	S. pombe SPBC106.19 /DEF=hypothetical protein
1777285_at	-0.160879	0.0633103	-0.763384	0.284686	S. pombe SPBC17D11.08 /DEF=WD repeat protein
1771327_at	-0.0291583	0.057572	-0.0497224	-0.051582	S. pombe SPBC106.20 /GEN=exo70 /DEF=localization exocyst (predicted)
1770224_at	-0.115389	0.0992279	-0.223735	0.152008	S. pombe SPAC16.05c /DEF=transcription factor (predicted)
1773186_at	0.0304689	0.145243	-0.0696519	0.0309912	S. pombe SPAC13F5.02c /GEN=ptr6 /DEF=transcription initiation factor activity
1779641_at	0.0538085	-0.0336224	0.145928	-0.0668726	S. pombe SPAC3G9.04 /GEN=ssu72 /DEF=CPF complex (PMID 14617822)
1774368_at	0.0391509	0.025411	-0.0618518	0.00239754	S. pombe SPAC3H1.08c /DEF=conserved eukaryotic protein
1775122_at	0.0155913	-0.0699422	0.0476602	-0.0041453	S. pombe SPBC1685.02c /GEN=rps1202 /DEF=40S ribosomal protein S12
1773834_at	-0.195811	0.36636	-0.562961	0.161788	S. pombe SPCC4G3.12c /DEF=zinc finger protein
1776424_at	-0.109736	-0.0205412	0.243772	0.0035305	S. pombe SPCC622.04 /DEF=dubious
1777954_at	0.0322596	-0.459421	0.784437	-0.0369428	S. pombe SPAC20H4.05c /DEF=phosphate epimerase (predicted)
1774851_at	0.208376	-0.158371	0.377967	-0.0952892	S. pombe SPBC14F5.01 /DEF=sequence orphan
1775554_at	-0.204415	0.155475	-0.054032	0.0393575	S. pombe SPCC895.04c /GEN=ufe1 /DEF=SNARE (predicted)
1780164_at	0.0619589	-0.250468	0.585696	-0.0249662	S. pombe SPBC13G1.04c /DEF=alkB homolog
1775435_at	-0.113964	0.0650196	-0.296878	0.516608	S. pombe SPBC16A3.10 /DEF=membrane bound O-acyltransferase (MBOAT) (predicted)
1774752_at	-0.152726	0.0331936	-0.29406	0.182573	S. pombe SPAC31G5.12c /GEN=n150 /DEF=conserved eukaryotic protein
1779934_at	0.0255791	0.0108569	0.0951494	-0.137291	S. pombe SPBC13E7.01 /GEN=cwf22 /DEF=conserved eukaryotic protein
1770416_at	-0.128109	0.274748	-0.525311	0.0425984	S. pombe SPCC1620.09c /DEF=transcription initiation factor activity
1779110_at	-0.170717	-0.117744	0.0752808	0.224771	S. pombe SPBC1271.11 /DEF=mitochondrial carrier
1769838_at	0.242615	2.46251	-0.767653	-0.0357424	S. pombe SPBC24C6.09c /DEF=phosphoketolase (predicted)
1777008_at	0.203415	-0.0245244	0.0375408	-0.437844	S. pombe SPAC1805.17 /GEN=crm1 /DEF=chromosome region maintenance protein 1
1779357_at	0.0572691	-0.0497589	-1.79976	0.530784	S. pombe SPCC737.04 /GEN=B8647-5 /DEF=Pfam-B_8647 domain
1770724_at	0.0097386	-0.0101849	-0.116921	0.22747	S. pombe SPAC23C11.08 /GEN=php3 /DEF=transcription factor
1779624_at	0.0635211	-0.0673221	0.0741876	-0.0622718	S. pombe SPCC330.14c /GEN=rpl2402 /DEF=60S ribosomal protein L24
1771589_at	1.19313	-0.207814	0.2115	0.242216	S. pombe SPBC839.06 /GEN=cta3 /DEF=Ca2(+)-ATPase (PMID 2145281)
1779443_at	0.035251	-0.0615374	0.19159	-0.290529	S. pombe SPBC12D12.01 /GEN=sad1 /DEF=localization spindle pole body (PMID 7744953)
1770570_at	0.0628621	-0.021856	0.127221	-0.104485	S. pombe SPAC1486.07c /GEN=mrpl19 /DEF=mitochondrial ribosomal protein subunit YmL19
1773756_at	0.0261752	0.0563504	-0.00731881	-0.147489	S. pombe SPAC13F5.05 /DEF=protein disulfide isomerase
1776612_at	0.05633	-0.107761	0.100348	-0.041577	S. pombe SPAC4G8.02c /DEF=translocon (gamma subunit)
1773303_at	-0.0195398	0.155094	-0.116638	-0.0452531	S. pombe SPCC970.04c /GEN=mob2 /DEF=phosphoprotein (predicted)
1775967_at	-0.186526	-0.0960558	1.04779	0.0335348	S. pombe SPBCPT2R1.08c /DEF=helicase
1779068_s_at	-0.109569	-0.0775073	0.658669	0.00447289	S. pombe SPBCPT2R1.08c /DEF=helicase
1775803_at	-0.0425599	0.022329	0.085446	-0.288372	S. pombe SPAC1A6.08c /DEF=hypothetical protein
1779179_at	0.230267	-0.0781968	0.15451	-0.0794579	S. pombe SPAC31G5.10 /GEN=eta2 /DEF=Myb family
1776448_at	-0.18805	-0.0298684	-0.182897	0.144324	S. pombe SPAC27E2.06c /DEF=methionine-tRNA ligase (predicted)
1770670_at	-0.114169	0.169102	-0.205235	0.0860262	S. pombe SPAC6F6.10c /GEN=arc2 /DEF=ARP23 actin-organizing complex
1769725_at	-0.815598	0.760302	-2.52118	0.291963	S. pombe SPAC22H10.13 /GEN=zym1 /DEF=metallothionein (PMID 12050156)
1772322_at	0.0305958	-0.0176884	0.0299943	-0.0619796	S. pombe SPBC354.02c /GEN=sec61 /DEF=translocon (alpha subunit) (predicted) (PMID 9427389)
1779896_at	0.0771872	0.0112279	-0.0249726	-0.0855942	S. pombe SPBC19F8.05 /DEF=sequence orphan
1775103_at	-0.0559158	0.15911	-0.0692679	0.0730041	S. pombe SPBC691.05c /GEN=pi030 /DEF=ion channel (predicted)
1777406_at	0.0538721	-0.0139701	-0.491034	0.0447537	S. pombe SPAC9G1.10c /DEF=inositol polyphosphate phosphatase (predicted)
1776742_at	0.0182699	-0.0347153	-0.265472	0.0956761	S. pombe SPCC613.03 /DEF=EF hand
1769337_at	-0.0784378	0.175181	-0.265043	0.0647291	S. pombe SPBC83.16c /DEF=conserved protein
1776795_at	0.708228	2.02533	-1.94046	-0.17553	S. pombe SPAC23H3.15c /DEF=serine-rich protein
1773266_at	-0.0346203	0.0820312	0.00149632	0.0319274	S. pombe SPAC1006.09 /GEN=win1 /DEF=serinethreonine protein kinase
1774834_at	-0.131988	0.130754	-0.158938	0.0578686	S. pombe SPBC1683.04 /DEF=beta-glucosidase activity (predicted)
1777820_at	0.193484	0.0163873	0.129817	-0.303064	S. pombe SPBC19C2.06c /DEF=hypothetical protein
1777161_at	0.0476977	0.247224	-0.162128	0.036616	S. pombe SPCC162.07 /DEF=epsin
1777485_at	0.1724	-0.060379	0.389264	-0.222205	S. pombe SPAC23C4.14 /DEF=beta-mannosyltransferase (predicted)
1778273_at	0.0392326	-0.0110871	0.065232	-0.0842667	S. pombe SPAC26A3.08 /GEN=smb1 /DEF=small nuclear ribonucleoprotein (snRNP) (subunit B)
1780002_at	-0.0797946	0.0741425	-0.115568	0.0550238	S. pombe SPAC6G9.07c /GEN=arc4 /DEF=ARP23 actin-organizing complex
1771114_at	0.0655206	-0.138728	-0.0839542	0.0702702	S. pombe SPAC1039.03 /DEF=esteraselipase (predicted)
1777173_at	-0.231741	0.313296	-0.259238	0.125173	S. pombe SPAC688.13 /GEN=scn1 /DEF=TatD DNase family
1772236_at	0.197376	-0.204783	0.521477	-0.0760492	S. pombe SPBC27B12.09c /DEF=transporter
1772842_at	-0.0390511	-0.196855	0.157649	0.0134665	S. pombe SPAC23H4.06 /GEN=gln1 /DEF=glutamate-ammonia ligase (glutamine synthetase) (PMID 7773104)
1773723_at	-0.0941327	0.237996	-0.360289	0.0681321	S. pombe SPAC6F6.08c /GEN=cdc16 /DEF=two-component GAP for GTPase spg1
1773740_at	0.0864874	-0.158743	0.266133	-0.179525	S. pombe SPAC22G7.03 /DEF=sequence orphan
1776176_at	-0.0813281	-0.232394	0.232173	0.00697199	S. pombe SPCC13B11.03c /DEF=hydroxyacylglutathione hydrolase (predicted)
1774803_at	-0.189732	-0.0623159	0.346023	0.0582323	S. pombe SPAC664.13 /DEF=dubious
1774202_at	-0.410438	-0.0480429	-0.627323	0.564776	S. pombe SPAC1399.04c /DEF=uracil phosphoribosyltransferase (predicted)
1774188_at	0.0692994	0.015914	-0.163238	-0.0449524	S. pombe SPBC16G5.16 /DEF=transcriptional regulator (predicted)
1780156_at	0.0773923	0.0412092	-0.0797981	-0.0455036	S. pombe SPBC1D7.03 /DEF=cyclin
1770860_at	0.0282224	-0.0181341	0.0312738	-0.0240383	S. pombe SPBC16A3.08c /DEF=nuclear telomere cap complex (predicted)
1777251_at	0.0425186	0.222901	-0.306465	0.0146271	S. pombe SPBC1861.09 /DEF=serinethreonine protein kinase (predicted)
1773468_at	0.0758588	0.0904624	-0.0574671	-0.2547	S. pombe SPBC1604.12 /DEF=sequence orphan
1771989_at	-0.00166766	-0.0657384	0.0792996	-0.0514504	S. pombe SPCC320.07c /GEN=mde7 /DEF=RNA-binding protein
1769878_at	-0.140921	-0.545003	0.184749	0.147837	S. pombe SPBC30D10.16 /DEF=chorismate mutase (predicted)
1771617_at	0.0771271	-0.019803	0.066891	-0.129619	S. pombe SPAC26A3.12c /GEN=dhp1 /DEF=5-3 exoribonuclease (PMID 11238999)
1774957_at	0.079922	-0.0856698	0.0455634	-0.0168508	S. pombe SPAC24C9.05c /DEF=conserved protein
1769656_at	-0.121689	-0.0794153	0.0187203	-0.0183185	S. pombe SPAC19A8.14 /DEF=conserved protein (broad species distribution)
1774847_at	0.162518	-0.0730244	0.458788	-0.277273	S. pombe SPCC320.08 /DEF=conserved protein
1771400_at	-0.0255826	0.159764	-0.0821441	0.0270297	S. pombe SPBP8B7.02 /DEF=sequence orphan
1773895_at	0.0585442	0.0884676	-0.0841077	-0.0458495	S. pombe SPAC12B10.10 /DEF=sequence orphan
1774607_at	0.195401	0.0125424	-0.238782	-0.0758797	S. pombe SPBC947.01 /GEN=sur2 /DEF=AAA family ATPase
1770646_at	0.0480277	0.0217937	0.00835482	0.0414076	S. pombe SPBC29A10.03c /DEF=chromatin remodeling complex (predicted)
1773394_at	-0.643926	0.678462	-1.34078	0.354139	S. pombe SPAC26F1.14c /DEF=flavoprotein (predicted)
1771924_at	0.0464058	0.00108941	0.382413	-0.112087	S. pombe SPAPB1A10.06c /DEF=DEADDEAH box helicase
1776660_at	-0.0411841	0.101216	-0.204505	0.0260286	S. pombe SPCC63.12c /DEF=20S proteasome component (beta 3)
1776684_at	0.24567	-0.0646105	0.452138	-0.265686	S. pombe SPBC16C6.12c /DEF=involved in cellular morphogenesis (predicted)
1772656_at	0.124067	-0.0794849	0.0185674	-0.0524381	S. pombe SPAPB21F2.02 /DEF=similar to A. nidulans dopA which causes delayed and asynchronous morphogenesis during asexual reproduction
1777432_at	0.210856	-0.118747	0.364827	-0.307855	S. pombe SPBC20F10.01 /GEN=gar1 /DEF=ribonucleoprotein (RNP) complex (PMID 8502556)
1769909_at	0.0265249	-0.0423454	0.0157827	0.013238	S. pombe SPAC1783.04c /GEN=hst4 /DEF=Sir2p family
1774931_at	-0.00133514	-0.160995	0.0187384	0.102733	S. pombe SPAC1002.02 /DEF=sequence orphan
1772474_at	0.253795	-0.113312	0.561697	-0.213083	S. pombe SPBC26H8.08c /DEF=GTPase activity (predicted)
1779062_at	0.0847336	-0.0597814	0.329826	-0.0544955	S. pombe SPBC17A3.04c /DEF=methionine-tRNA ligase (predicted)
1775356_at	0.0430285	0.330802	-0.12613	0.0111459	S. pombe SPAC1002.04c /GEN=taf11 /DEF=transcription initiation factor activity
1771621_at	-0.114031	-0.216345	0.230334	0.399918	S. pombe SPAC1B3.16c /GEN=vht1 /DEF=vitamin H transporter (PMID 12557275)
1775427_at	-0.23217	0.163278	-0.757445	0.0205599	S. pombe SPBC14F5.11c /DEF=PX domain
1774879_at	0.028369	-0.0887095	0.255893	-0.0225207	S. pombe SPBC1604.04 /DEF=transporter activity
1778799_at	0.0501804	-0.04433	0.756577	-0.094992	S. pombe SPAC1F8.06 /DEF=glycoprotein (predicted)
1780182_at	0.0220388	0.0896686	-0.353764	0.0424608	S. pombe SPBC17F3.02 /GEN=nak1 /DEF=N-terminal protein kinase
1771411_at	-0.0480769	0.07105	0.0576735	-0.111148	S. pombe SPBC16E9.08 /DEF=hypothetical protein
1769447_at	-0.0726996	-0.0851059	-0.00143147	0.114782	S. pombe SPCC1840.04 /DEF=metacaspase-like protein
1777435_at	0.0249631	0.151137	-0.285604	0.0260312	S. pombe SPAC25B8.11 /DEF=involved in transcriptional regulation (predicted)
1772577_at	-0.101662	0.0378984	-0.491882	0.225769	S. pombe SPBC106.02c /DEF=ParBc-like nuclease domain (SMART)
1773638_at	-0.0285769	-0.0462834	0.03615	-0.0256154	S. pombe SPBC14C8.17c /DEF=WD repeat protein
1773813_at	-0.00950082	-0.378016	0.306874	-0.0653035	S. pombe SPBC4B4.05 /GEN=smg1 /DEF=small nuclear ribonucleoprotein (snRNP) (subunit G)
1778618_at	0.0181866	-0.0295045	0.0831029	-0.0496035	S. pombe SPAC2F3.18c /DEF=dubious
1776446_at	0.0351769	0.00443331	0.0123596	-0.0298869	S. pombe SPAC23C4.08 /GEN=rho3 /DEF=GTPase
1774250_at	0.180023	-0.102458	0.55176	-0.209056	S. pombe SPCC613.08 /DEF=cdk inhibitor (predicted)
1770644_at	0.0132106	-0.032526	0.126222	-0.112109	S. pombe SPBC342.03 /DEF=GAS family
1773174_at	-0.0171591	0.0716515	-0.178519	0.00379912	S. pombe SPAC15A10.16 /GEN=fat1 /DEF=actin-binding protein (predicted)
1770907_at	0.111459	0.302973	-0.182634	-0.171398	S. pombe SPBC11C11.05 /DEF=involved in cell wall biosynthesis (predicted)
1771581_at	0.115082	-0.0685991	0.187089	-0.253335	S. pombe SPBC1539.05 /DEF=Golgi transport complex (predicted)
1770252_at	-0.0400508	0.10466	-0.181088	0.0312767	S. pombe SPAC17A2.13c /GEN=rad25 /DEF=14-3-3 protein
1774380_at	-0.13069	0.177356	-0.133093	0.0803067	S. pombe SPBC365.08c /DEF=Der1-like (degradation in the ER) family
1775752_at	0.113123	-0.119401	0.0585143	-0.0946919	S. pombe SPAC5D6.13 /DEF=involved in intracellular protein transport (predicted)
1779687_at	0.102	-0.105597	0.348457	-0.042148	S. pombe SPBC18H10.06c /GEN=swd2 /DEF=SET1 complex (TAP) (PMID 12488447)
1770045_at	-0.0778739	0.0727536	-0.0506522	0.466646	S. pombe SPAC11D3.18c /DEF=membrane transporter
1773223_at	-0.169429	0.222963	-0.218142	0.0651045	S. pombe SPAC9E9.10c /GEN=cbh1 /DEF=centromere binding protein (k-type repeat)
1770163_at	0.0308151	0.095452	-0.0186351	-0.0237131	S. pombe SPBC337.12 /DEF=zinc finger protein
1779245_at	-0.00547886	-0.0611706	0.0975946	-0.0192464	S. pombe SPCC338.14 /DEF=adenosine kinase (predicted)
1774543_at	0.0391649	-0.0965157	-0.0974821	0.0289942	S. pombe SPBC32F12.12c /DEF=conserved fungal protein
1775339_at	0.250763	0.000332197	0.051685	-0.463628	S. pombe SPBC1685.12c /DEF=dubious
1774310_at	-0.00609016	0.0602077	-0.098931	-0.0293684	S. pombe SPCC24B10.17 /DEF=emp24 family
1778826_at	-0.120638	-0.368675	0.267575	0.0219199	S. pombe SPCC417.12 /DEF=carboxylesterase-lipase family (predicted)
1777713_at	-0.00699139	-0.0485036	-0.465011	0.14619	S. pombe SPBC216.05 /GEN=rad3 /DEF=ATR (ATM) checkpoint kinase
1776181_at	0.0402819	0.497711	-0.935055	-0.0202379	S. pombe SPBC3E7.02c /GEN=hsp16 /DEF=heat shock protein
1771026_at	0.0521565	-0.0811666	-0.197932	0.0191724	S. pombe SPAC6F12.04 /DEF=conserved fungal protein
1775521_at	-0.157443	0.189363	-0.264684	0.131123	S. pombe SPCC777.05 /GEN=gtr2 /DEF=GTPase
1774544_at	0.00210253	0.361285	-0.144522	-0.0543356	S. pombe SPBC1604.20c /GEN=tea2 /DEF=kinesin-like protein
1770853_at	-0.0187206	0.110901	0.0101894	-0.146242	S. pombe SPBC646.02 /GEN=cwf11 /DEF=complexed with Cdc5p (PMID 11884590)
1771912_at	-0.0821196	0.497355	-0.358673	0.0296911	S. pombe SPCC188.13c /GEN=dcr1 /DEF=dicer
1777530_at	-0.0211369	0.0153427	-0.0997496	0.134362	S. pombe SPAC12B10.11 /GEN=exg2 /DEF=glycosyl hydrolase family 5
1772659_at	0.0627966	0.458664	-0.142259	-0.0884533	S. pombe SPBC1685.08 /DEF=zinc finger protein
1769433_at	-0.0408599	0.0620031	-0.0491597	0.0366456	S. pombe SPCP25A2.03 /DEF=vertebrate p84 (retinoblastoma binding) orthologue
1777953_at	0.058218	0.00235685	-0.015509	-0.0426547	S. pombe SPAC13G6.10c /DEF=serine-rich protein
1770299_at	0.0835695	-0.110623	0.364573	-0.0865129	S. pombe SPAC31A2.15c /DEF=replication factor C complex (predicted)
1772639_at	-0.00361888	-0.000884692	0.102592	-0.0589256	S. pombe SPAC3G9.13c /DEF=tryptophan-tRNA ligase (predicted)
1770081_at	-0.0367581	0.115801	-0.115973	0.0173063	S. pombe SPAC732.02c /DEF=6-phosphofructo-2-kinase (predicted)
1776561_at	0.132631	-0.0913235	0.0740932	-0.0921577	S. pombe SPCC11E10.05c /GEN=ynd1 /DEF=nucleotide diphosphatase activity (PMID 12686557)
1769869_at	-0.00344022	0.0108191	-0.120355	0.0302327	S. pombe SPBC13G1.02 /DEF=mannose-1-phosphate guanyltransferase (predicted)
1780167_at	-0.35979	0.15773	-0.605012	0.200722	S. pombe SPAC9E9.15 /DEF=sequence orphan
1771759_at	0.169618	-0.153316	0.509406	-0.373628	S. pombe SPBC25B2.05 /GEN=mis3 /DEF=RNA-binding protein
1771297_at	-0.12223	-0.745562	0.321763	0.416416	S. pombe SPAC11H11.04 /GEN=mam2 /DEF=pheromone p-factor receptor (PMID 1657593)
1776691_at	0.0156212	0.37663	-0.388492	-0.0139856	S. pombe SPBC16E9.11c /GEN=pub3 /DEF=ubiquitin-protein ligase (E3)
1775794_at	-0.0500806	-0.00541496	0.0277414	0.0227969	S. pombe SPBC2D10.07c /DEF=mitochondrial inner membrane peptidase complex
1779527_at	-0.0659358	-0.0234763	0.11769	-0.0201108	S. pombe SPBC18H10.10c /GEN=cwc16 /DEF=conserved eukaryotic protein
1775082_at	-0.445023	0.722244	-0.522447	0.317074	S. pombe SPAC22G7.11c /DEF=conserved fungal protein
1777349_at	0.0753183	0.120988	-0.0821177	-0.0497138	S. pombe SPCC188.02 /GEN=par1 /DEF=protein phosphatase regulatory subunit (PMID 10757751)
1778902_at	-0.419896	0.434783	-1.01522	0.157602	S. pombe SPAC22E12.03c /DEF=THIJPFPI family protein
1778699_at	0.0567487	0.190836	-0.0116723	-0.527066	S. pombe SPBP4H10.14c /DEF=sequence orphan
1779005_at	-0.107773	0.0258646	-0.260206	0.208025	S. pombe SPAC5D6.08c /GEN=mes1 /DEF=meiosis II protein
1769763_at	-0.021101	-0.0532166	0.0975841	0.00985209	S. pombe SPAC9G1.04 /GEN=oxa101 /DEF=involved in protein targeting
1779606_at	-0.139283	0.29756	-0.190719	0.157564	S. pombe SPAC23A1.16c /DEF=conserved eukaryotic protein
1775496_at	-0.088357	0.0832942	0.0332623	-0.228167	S. pombe SPAC1834.07 /GEN=klp3 /DEF=kinesin-like protein
1777243_at	-0.110557	0.148853	-0.132346	0.111497	S. pombe SPAC14C4.04 /GEN=B22918-2 /DEF=hypothetical protein
1772784_at	0.061808	-0.223699	0.438057	0.0496788	S. pombe SPBC18H10.21c /DEF=dubious
1778923_at	-0.262974	0.0628891	-0.254764	0.295513	S. pombe SPAC1556.01c /GEN=rad50 /DEF=involved in DNA repair
1777469_at	0.0556053	-0.0399179	-0.130665	0.0554361	S. pombe SPAC29B12.03 /GEN=spd1 /DEF=S-phase inhibitor (PMID 8887552)
1771720_at	-0.0406435	-0.116397	0.108707	-0.0130609	S. pombe SPCC338.02 /DEF=sequence orphan
1780125_at	-0.0882734	0.0597496	-0.314701	0.0630229	S. pombe SPAC29E6.01 /GEN=pof11 /DEF=F-box protein
1771298_at	0.102985	-0.150922	0.465763	-0.0157925	S. pombe SPBC6B1.04 /GEN=mde4 /DEF=no apparent orthologs
1778962_at	0.0322103	0.056599	0.0335404	0.0419505	S. pombe SPAC4D7.01c /GEN=sec71 /DEF=Sec7 domain
1779370_at	0.0813529	0.133169	-0.033947	-0.0764793	S. pombe SPAC11E3.01c /DEF=SNF2 family
1772526_at	-0.113019	0.124048	-0.377045	0.0162115	S. pombe SPAC3A11.06 /GEN=mvp1 /DEF=phosphoinositide binding (predicted)
1770004_at	0.00258859	0.0425816	-0.0252876	-0.0339069	S. pombe SPBC11B10.05c /GEN=rsp1 /DEF=DNAJ domain protein
1776974_at	0.0545518	0.123057	-0.0982822	-0.0456467	S. pombe SPBC354.07c /DEF=oxysterol binding protein (predicted)
1775200_at	0.153581	-0.125845	0.439404	-0.184904	S. pombe SPAC2E1P5.05 /DEF=U3 snoRNP associated (predicted)
1777849_at	-0.036019	-0.0143798	-0.0014445	0.0507765	S. pombe SPAC30C2.05 /GEN=erv14 /DEF=involved in intracellular protein transport
1774260_at	-0.220176	0.148827	-0.469455	0.106105	S. pombe SPAC2C4.09 /DEF=conserved eukaryotic protein
1776286_at	0.0372963	0.130057	-0.0211554	-0.165804	S. pombe SPBC1711.08 /DEF=chaperone activator activity (predicted)
1771765_at	0.100862	-0.0750885	0.287362	-0.0677652	S. pombe SPAC12G12.13c /GEN=cid14 /DEF=DNA polymerase sigma
1777624_at	0.112517	0.208018	-0.107572	-0.305217	S. pombe SPAC24H6.11c /DEF=sulfate transporter (predicted)
1772922_at	-0.0405483	-0.0995638	0.0814145	-0.0188243	S. pombe SPCC13B11.02c /DEF=dubious
1770218_at	0.112948	1.43265	-1.31496	0.139277	S. pombe SPAC3G6.07 /DEF=dubious
1774586_s_at	0.0711152	-0.589441	-0.0716588	1.62429	S. pombe SPAC977.04 /DEF=pseudogene
1776640_at	-0.119063	-0.441334	0.129744	0.128049	S. pombe SPBC19G7.02 /DEF=aminotransferase class V (predicted)
1776240_at	-0.114386	0.0851943	0.168061	0.0906127	S. pombe SPBC14C8.09c /DEF=conserved protein (broad species distribution)
1773016_at	-0.0778179	-0.290563	0.115987	0.147365	S. pombe SPAC8C9.12c /DEF=mitochondrial carrier
1770728_at	-0.0756985	0.0207815	0.0450357	-0.0372133	S. pombe SPAC24C9.02c /DEF=cytochrome c1 heme lyase (predicted)
1776584_at	-0.0640494	0.439879	-0.528683	-0.157275	S. pombe SPBC4F6.17c /DEF=AAA family ATPase
1779225_at	0.0708517	0.00971635	-0.0940793	0.0247374	S. pombe SPAC27D7.02c /DEF=conserved eukaryotic protein
1772018_at	0.0347363	0.220527	-0.126739	-0.0281499	S. pombe SPCC1322.04 /DEF=UTP-glucose-1-phosphate uridylyltransferase activity (predicted)
1776038_at	-0.0808423	0.709028	-0.0645939	-0.0812833	S. pombe SPBP8B7.05c /DEF=carbonic anhydrase family
1779424_at	0.0781355	-0.0792214	0.224546	-0.0686992	S. pombe SPAC18G6.07c /GEN=mra1 /DEF=functions downstream of Ras1p
1777814_at	-0.102639	0.0366074	-0.162852	0.278811	S. pombe SPCC1450.09c /DEF=lysophospholipase (predicted)
1774747_at	0.0692663	-0.121575	0.152574	-0.115135	S. pombe SPBP35G2.07 /GEN=ilv1 /DEF=acetolactate synthase subunit (PMID 8299177)
1772768_at	-0.0470394	-0.125245	-0.0264737	0.11902	S. pombe SPAC19B12.07c /DEF=zinc finger protein
1775825_at	-0.0287453	-0.234229	0.107583	0.0638145	S. pombe SPBC215.01 /DEF=TBC domain protein
1775776_at	0.0325654	-0.224366	0.327864	-0.0554803	S. pombe SPAC694.04c /DEF=metal dependent hydrolase (predicted)
1777259_at	-0.37062	0.227063	-0.523844	0.277491	S. pombe SPAC513.05 /DEF=alpha-mannosidase (predicted)
1780202_at	0.246493	-0.112296	0.714142	-0.286421	S. pombe SPAC22G7.05 /DEF=involved in ribosome biogenesis and assembly (predicted)
1777288_at	-0.0138267	0.0489171	-0.262515	-0.0217295	S. pombe SPAC6F6.13c /DEF=conserved protein
1773384_at	0.136775	-0.00388368	-0.147199	0.0216236	S. pombe SPCC757.12 /DEF=glycosyl hydrolase family 13
1773406_at	-0.00570043	0.0509669	-0.05406	-0.00706069	S. pombe SPAC1142.01 /DEF=conserved eukaryotic protein
1769728_at	-9.53674e-07	-0.0910498	0.159037	-0.0569887	S. pombe SPBC1709.15c /GEN=cft2 /DEF=CPF complex (PMID 14617822)
1770978_at	0.0711292	-0.165796	0.569715	-0.0270077	S. pombe SPAC23H4.10c /GEN=thi4 /DEF=bifunctional enzyme
1775886_at	-0.0916615	0.127269	-0.256553	0.106033	S. pombe SPCC1739.09c /GEN=cox13 /DEF=cytochrome c oxidase subunit VIa
1779867_at	-0.0413688	0.0899468	0.0876814	-0.120861	S. pombe SPAC6F12.08c /DEF=sequence orphan
1773098_at	0.0147915	0.270259	-0.15156	0.0714601	S. pombe SPAC2G11.05c /DEF=BRO1-like domain
1770738_at	0.0809984	-0.27154	0.118265	-0.027249	S. pombe SPAC10F6.09c /GEN=psm3 /DEF=mitotic cohesin complex (subunit)
1775447_at	-0.0784547	-0.0992953	0.297878	-0.120313	S. pombe SPBC16G5.10 /DEF=exosome (RNase complex) (predicted)
1778589_at	0.271744	0.0370404	-0.115862	-0.118098	S. pombe SPBC28E12.03 /GEN=rga4 /DEF=GTPase activating protein
1777754_at	0.0356452	-0.0704444	0.0620696	-0.0581681	S. pombe SPBC2G2.03c /DEF=translocon
1775099_at	-0.0447423	-0.0926574	0.21157	-0.121709	S. pombe SPAC30D11.07 /GEN=nth1 /DEF=DNA endonuclease III
1772267_at	0.20913	-0.181348	0.504744	-0.0797879	S. pombe SPCC663.05c /GEN=cia1 /DEF=chaperone activity
1772913_at	-0.376391	-0.167347	0.368138	0.295257	S. pombe SPCPB1C11.03 /DEF=membrane transporter
1778535_at	-0.0676982	0.0592731	0.0135196	-0.220738	S. pombe SPAC29B12.05c /DEF=S-adenosylmethionine-dependent methyltransferase activity (predicted)
1770354_at	-0.176581	0.518479	-0.591068	0.263127	S. pombe SPAC57A7.09 /DEF=zinc finger protein
1770233_at	-0.114964	0.259131	-0.18559	0.0973555	S. pombe SPAC1782.05 /DEF=similar to S. cerevisiae YPL152W
1769367_at	-0.0358276	-0.0321916	0.251768	0.00309181	S. pombe SPAC13G7.06 /DEF=phosphoadenosine phosphosulfate reductase (predicted)
1773119_at	0.227026	-0.272321	0.147642	-0.0232773	S. pombe SPAC140.03 /DEF=hypothetical protein
1778551_at	0.0416886	-0.132527	0.24131	-0.0271683	S. pombe SPAC323.05c /DEF=DNA methyltransferase (predicted)
1780100_at	-0.094848	-0.115687	-0.52688	0.410602	S. pombe SPAC23G3.07c /DEF=hypothetical protein
1775514_at	-0.0258859	0.0849937	-0.179842	0.0177387	S. pombe SPAC644.13c /DEF=Rab interactor activity (predicted)
1775105_at	-0.0654942	-0.00232855	0.0178	0.00164858	S. pombe SPAC630.11 /DEF=involved in intracellular protein transport
1770973_at	-0.0777957	-0.0519403	0.114487	0.0770798	S. pombe SPCC1259.07 /DEF=sequence orphan
1775503_at	-0.12475	0.0824595	-0.24395	0.135138	S. pombe SPAC3A12.18 /GEN=zwf1 /DEF=glucose-6-phosphate 1-dehydrogenase (predicted)
1770931_at	-0.123086	0.143184	0.0242888	-0.0311225	S. pombe SPCC16C4.06c /DEF=tRNA pseudouridylate synthase (putative)
1779622_at	-0.0309817	-0.116061	0.259124	-0.0522769	S. pombe SPBC21C3.10c /DEF=5-amino-6-(5-phosphoribosylamino) uracil reductase activity
1770336_at	0.0668627	-0.239541	0.245303	-0.359164	S. pombe SPCC553.08c /DEF=translation elongation factor (predicted)
1773692_at	-0.00161203	-0.197321	0.182918	-0.00702222	S. pombe SPBC428.02c /GEN=eca39 /DEF=branched chain amino acid aminotransferase
1772211_at	0.393356	-0.208367	0.826142	-0.273665	S. pombe SPBC23E6.05 /DEF=metallopeptidase
1775135_at	-0.339578	-0.254905	0.346938	0.2218	S. pombe SPCC622.05 /DEF=dubious
1778178_at	-0.0887683	0.218968	-0.355015	-0.0685323	S. pombe SPCC338.06c /DEF=heat shock protein
1771284_at	0.160468	-0.0807997	0.51086	-0.138326	S. pombe SPBC776.08c /DEF=Nrap
1779177_at	-0.0959956	-0.046319	0.291281	-0.205231	S. pombe SPBC18E5.08 /DEF=N-acetyltransferase (predicted)
1770301_at	-0.0368287	0.017067	0.117163	-0.318492	S. pombe SPAC4G9.08c /GEN=rpc2 /DEF=localization DNA-directed RNA polymerase III complex (subunit)
1769535_at	0.0582374	-0.00985018	0.211227	-0.148819	S. pombe SPBC685.09 /GEN=orc2 /DEF=origin recognition complex (subunit 2)
1771647_at	-0.0119635	-0.0444803	0.104721	-0.10425	S. pombe SPBP19A11.01 /DEF=glycine cleavage system h protein (predicted)
1773037_at	-0.177082	0.0838531	-0.548272	0.278637	S. pombe SPBP4H10.10 /DEF=rhomboid family protease
1777806_at	0.333146	-0.0682487	0.782166	-0.254673	S. pombe SPBC32H8.05 /DEF=conserved fungal protein
1772501_at	-0.12969	0.106972	0.0100679	0.0494261	S. pombe SPBC19G7.13 /DEF=Myb family
1776656_at	0.176917	-0.0801182	0.666876	-0.0441402	S. pombe SPAC1D4.10 /DEF=ribonuclease (predicted)
1771163_at	-0.0913137	0.0799011	-0.139645	0.0377353	S. pombe SPBC16H5.06 /GEN=rip1 /DEF=ubiquinol-cytochrome-c reductase complex subunit 5
1776039_at	0.0241871	-0.0929877	-0.00374889	0.120494	S. pombe SPAC22G7.01c /DEF=aminopeptidase (predicted)
1778935_at	0.042669	-0.538622	0.316719	-0.0757848	S. pombe SPBC1347.01c /DEF=deoxycytidyl transferase (predicted)
1772445_at	-0.0057745	0.0497061	0.00782521	-0.0825078	S. pombe SPAC17A5.01 /DEF=peroxin-6 (predicted)
1775434_at	0.0310164	0.045715	-0.0640949	-0.120682	S. pombe SPBP22H7.07 /GEN=prp5 /DEF=WD repeat protein
1779432_at	-0.00941118	0.253258	-0.396093	0.0134322	S. pombe SPBC146.09c /DEF=oxidoreductase (predicted)
1779180_at	0.213608	-0.178253	0.422482	-0.507263	S. pombe SPBC839.07 /GEN=ibp1 /DEF=rhodanese-like domain
1770433_at	-0.0317462	0.048576	-0.0676632	0.0662085	S. pombe SPCC737.02c /GEN=qcr7 /DEF=ubiquinol-cytochrome-c reductase complex subunit 6
1776148_at	-0.00928084	-0.0861257	0.0406946	0.0321569	S. pombe SPBC14C8.04 /DEF=acetolactate synthase (small subunit) (predicted)
1772782_at	0.0319227	0.0906757	-0.319846	-0.0353727	S. pombe SPBC428.13c /GEN=mob1 /DEF=Sid2p-Mob1p kinase complex
1777450_at	0.0330582	0.0974388	0.0145715	-0.242685	S. pombe SPAC167.03c /GEN=snu66 /DEF=involved in mRNA splicing
1774555_at	-0.0754563	0.247935	-0.00391197	-0.0198876	S. pombe SPAC1002.11 /DEF=GPI-anchor transamidase complex
1776970_at	0.0243711	0.0225134	-0.0257715	0.0128714	S. pombe SPCC1281.08 /GEN=wtf11 /DEF=wtf element
1776437_at	-0.0232401	0.187548	-0.0653153	0.0278896	S. pombe SPBC211.03c /DEF=Sec7 domain
1770652_at	-0.0171607	-0.429741	0.475679	-0.0125319	S. pombe SPBP23A10.02 /DEF=hypothetical protein
1778650_at	-0.205487	-0.0100994	-0.0195904	0.17436	S. pombe SPBC776.16 /DEF=sequence orphan
1772859_at	-0.218183	-0.0432291	0.116636	0.150571	S. pombe SPBC16H5.14c /DEF=short chain dehydrogenase (predicted)
1777751_at	0.108848	-0.0460402	0.112712	-0.275816	S. pombe SPCC645.13 /DEF=zinc finger protein
1776826_at	-0.108511	-0.0221729	0.0758508	0.0383898	S. pombe SPAC1F5.07c /DEF=protoporphyrinogen oxidase (predicted)
1779166_at	-0.00616964	0.0345084	0.0200208	0.0478261	S. pombe SPCC364.05 /GEN=vps3 /DEF=CNH domain
1776755_at	0.114865	0.0319033	-0.0262966	-0.333834	S. pombe SPBP19A11.02c /DEF=glycoprotein (predicted)
1774420_at	-0.0419928	-0.0533622	0.0319014	0.0471764	S. pombe SPBC582.09 /GEN=pex11 /DEF=involved in peroxisome organization and biogenesis (predicted)
1776331_at	-0.00151539	-0.156082	-0.046675	0.121578	S. pombe SPBC16E9.19 /DEF=dubious
1779474_at	0.0107463	-0.420589	-0.0595598	1.30022	S. pombe SPBC8E4.03 /DEF=agmatinase (predicted)
1777698_at	-0.131957	0.0978359	-0.496849	0.049072	S. pombe SPAC12B10.16c /DEF=conserved protein
1776130_at	0.120053	-0.0861953	0.200817	-0.138647	S. pombe SPAC8C9.15c /GEN=tif225 /DEF=translation initiation factor
1779076_at	0.007363	-0.0178693	0.00731087	0.012242	S. pombe SPAC694.05c /GEN=rps2502 /DEF=40S ribosomal protein S25
1775051_at	0.00782967	-0.0110273	-0.0193907	0.0168997	S. pombe SPAC6F6.07c /GEN=rps13 /DEF=40S ribosomal protein S13
1775899_at	-0.314653	0.218284	-0.508588	0.247505	S. pombe SPAPB2B4.06 /DEF=hypothetical protein
1776243_at	-0.0869557	-0.0401977	0.0811802	0.0502052	S. pombe SPBC776.10c /DEF=Golgi transport complex (peripheral subunit) (predicted) (PMID 12006647)
1775113_at	0.00538699	-0.1886	0.330332	-0.219007	S. pombe SPBC947.07 /DEF=involved in ribosome biogenesis and assembly (predicted)
1771750_at	0.335455	-0.531887	0.70378	-0.719454	S. pombe SPBPB10D8.01 /DEF=membrane transporter
1772429_at	-0.0175031	0.11386	-0.0466045	-0.0780344	S. pombe SPAC6G9.14 /DEF=serine-rich protein
1775726_at	0.0128277	-0.222816	0.05979	0.132585	S. pombe SPCC74.09 /DEF=RNA-binding protein
1777518_at	0.0180152	-0.0468051	0.0262283	-0.0371421	S. pombe SPAC3H5.10 /GEN=rpl3202 /DEF=60S ribosomal protein L32
1776916_at	-0.182647	-0.128248	0.315156	0.0655076	S. pombe SPAC1093.04c /DEF=tRNA nucleotidyltransferase (predicted)
1776920_at	0.236641	-0.111036	0.537434	-0.352545	S. pombe SPBC1703.03c /DEF=conserved yeast protein
1773867_at	-0.00356134	0.217838	-0.23336	0.00927289	S. pombe SPAP32A8.02 /DEF=aldoketo reductase
1777037_at	0.405539	-0.39485	0.91416	-0.562282	S. pombe SPBC3H7.07c /DEF=phosphoserine phosphatase (predicted)
1775552_at	-0.236176	0.0758727	-0.031153	0.102208	S. pombe SPBC11G11.04 /GEN=trs20 /DEF=TRAPP (predicted)
1772775_at	0.244747	-0.166299	0.476033	-0.436474	S. pombe SPBP8B7.16c /GEN=dbp2 /DEF=DEADDEAH box helicase
1771032_at	0.00745328	-0.0435279	0.00460879	-0.0118752	S. pombe SPAC4F10.14c /GEN=btf3 /DEF=nascent polypeptide-associated complex (predicted) (PMID 8809106)
1775027_at	0.0404689	0.0944061	-0.140207	-0.0138006	S. pombe SPBC9B6.08 /GEN=clc1 /DEF=clathrin light chain
1775936_at	0.0184568	0.0441542	-0.0756474	-0.0306381	S. pombe SPBC1539.06 /DEF=acyl-coenzyme A binding protein (predicted)
1773213_at	0.0316302	-0.0363712	0.0284211	-0.162686	S. pombe SPAC110.04c /GEN=pss1 /DEF=heat shock protein 70 family
1776325_at	-0.12294	0.0626847	-0.0285463	-0.00352955	S. pombe SPBP8B7.29 /DEF=para-aminobenzoate synthase (predicted)
1772297_at	-0.241063	0.237286	-0.620172	0.080567	S. pombe SPAC343.04c /DEF=WD repeat protein
1779765_at	-0.0301323	0.124304	-0.0993191	-0.0354983	S. pombe SPCC576.15c /GEN=ksg1 /DEF=serinethreonine protein kinase
1771545_at	0.0178267	0.136629	-0.0568469	-0.0311807	S. pombe SPAC16.01 /GEN=rho2 /DEF=GTPase
1779596_at	-0.0621678	-0.225553	0.185026	0.0966705	S. pombe SPBC23E6.01c /DEF=RNA-binding protein
1779452_at	0.0269168	-0.039307	-0.00634893	0.0814196	S. pombe SPBC2G2.04c /GEN=mmf1 /DEF=conserved eukaryotic protein
1777194_at	0.187455	0.102754	-0.173016	-0.412278	S. pombe SPAC18G6.12c /GEN=B22918-1 /DEF=B22918 domain
1771030_at	0.0349433	-0.322017	0.278069	-0.0343323	S. pombe SPAC10F6.02c /GEN=prp22 /DEF=ATP-dependent
1775817_at	0.0648057	-0.34457	0.227002	-0.0746336	S. pombe SPBC31E1.03 /GEN=ubl4 /DEF=ubiquitin family protein
1779505_at	0.230221	-0.100598	0.729548	-0.0774187	S. pombe SPAC9G1.12 /GEN=cpd1 /DEF=tRNA methyltransferase
1775456_at	0.0242462	0.380034	-0.35809	0.00511551	S. pombe SPAC644.06c /GEN=cdr1 /DEF=serinethreonine protein kinase
1776599_at	-0.267256	0.168125	-0.44355	0.0814673	S. pombe SPAC5D6.07c /DEF=hypothetical protein
1772722_at	0.27792	-0.503987	0.700029	-0.42727	S. pombe SPBC31F10.17c /DEF=sequence orphan
1775691_at	-0.059226	0.0348393	0.0659895	-0.0441014	S. pombe SPAC23H3.02c /GEN=ini1 /DEF=RING finger-like protein (PMID 14762117)
1777519_at	0.158308	0.154437	-0.102919	-0.148577	S. pombe SPCC1393.11 /DEF=sequence orphan
1772454_at	0.0816615	-0.43058	0.485092	-0.13058	S. pombe SPAC9.10 /DEF=amino acid permease family
1769537_at	0.0194397	0.0995239	-0.0932814	-0.0790987	S. pombe SPBC3B9.15c /GEN=scp1 /DEF=WD repeat protein
1770371_at	-0.215896	0.0877673	-0.0834134	0.103258	S. pombe SPBC21C3.01c /GEN=vps13a /DEF=involved in intracellular protein transport (predicted)
1779216_at	-0.0758584	0.168325	-0.1608	0.0364838	S. pombe SPAC6F12.15c /GEN=cut9 /DEF=anaphase-promoting complex (APC)
1774781_at	-0.232542	0.182071	-0.374483	0.143606	S. pombe SPAC11D3.07c /DEF=involved in transcriptional regulation
1774959_at	-0.131701	0.00456651	0.0521059	0.112791	S. pombe SPBC4C3.04c /DEF=guanyl-nucleotide exchange factor activity (predicted)
1773793_at	0.0102498	-0.12989	0.171285	-0.0997283	S. pombe SPAC343.08c /GEN=mrp17 /DEF=mitochondrial ribosomal protein subunit YmS16
1771528_at	-0.0689408	-0.0645288	0.0881344	-0.0211681	S. pombe SPBC15D4.13c /DEF=sequence orphan
1770057_at	0.0317434	-0.291681	0.243677	-0.0197519	S. pombe SPBC4C3.03 /DEF=homoserine kinase (predicted)
1770268_at	0.0260607	-0.0159076	7.69297e-05	0.00412051	S. pombe SPBC1685.10 /GEN=rps27 /DEF=40S ribosomal protein S27
1777830_at	0.132184	0.0333316	-0.172403	-0.169278	S. pombe SPCC16C4.14c /GEN=sfc4 /DEF=transcription factor TFIIIC complex
1778675_at	-0.0493994	0.1761	-0.114543	-0.00464726	S. pombe SPAC458.07 /GEN=tfa1 /DEF=transcription initiation factor activity
1773251_at	0.438114	-0.554041	-2.70425	0.558561	S. pombe SPBPB21E7.04c /DEF=S-adenosylmethionine-dependent methyltransferase activity (predicted)
1771283_at	0.140353	-0.161075	0.275661	-0.0978025	S. pombe SPCC1450.06c /GEN=grx3 /DEF=arsenate reductase (glutaredoxin) activity
1778820_s_at	-0.165668	-0.200561	0.184038	0.127716	S. pombe SPAC19B12.12c /GEN=yip11 /DEF=SMN family (PMID 10749973)
1772159_at	0.0848618	-0.0179561	0.108407	-0.188024	S. pombe SPCC1183.01 /GEN=sec15 /DEF=localization exocyst (predicted)
1772904_at	-0.119781	0.0586294	0.0454019	0.0533123	S. pombe SPCC1494.09c /DEF=hypothetical protein
1780010_at	-0.219456	0.0285536	0.0399008	0.104061	S. pombe SPBC336.07 /GEN=sfc3 /DEF=transcription factor
1771623_at	0.00133451	-0.0312452	0.149414	-0.0876198	S. pombe SPAC1D4.09c /DEF=conserved eukaryotic protein
1773986_at	0.133783	-0.0616382	0.172866	-0.246112	S. pombe SPBC13A2.02 /DEF=nucleoporin
1780251_at	0.079477	-0.0470406	0.400698	-0.133891	S. pombe SPAC1687.10 /DEF=sequence orphan
1774538_at	0.0969327	-0.062767	0.180081	-0.0916478	S. pombe SPAC1782.10c /GEN=nhp2 /DEF=localization nucleolus (predicted)
1776575_at	0.220794	-0.135029	0.577757	-0.0194718	S. pombe SPBC16C6.01c /DEF=SET domain
1770171_at	-0.0856876	0.0729577	-0.127203	0.0882928	S. pombe SPCC330.12c /GEN=sdh3 /DEF=succinate dehydrogenase (ubiquinone)
1778250_at	-0.215204	-0.0323912	-0.189915	0.281717	S. pombe SPAC1B3.15c /DEF=transporter
1772117_at	-0.0460488	-0.28214	0.699842	-0.0473849	S. pombe SPBC428.11 /DEF=homocysteine synthase (PMID 11754480)
1778707_at	0.152093	0.0652418	0.0412146	-0.101591	S. pombe SPAPB17E12.08 /DEF=sequence orphan
1776592_at	-0.0980651	-0.297129	0.258099	0.217648	S. pombe SPBC418.01c /GEN=his4 /DEF=bifunctional enzyme
1779090_at	-0.126077	0.0342696	-0.00443268	0.129768	S. pombe SPCC70.05c /DEF=serinethreonine protein kinase (predicted)
1778455_at	0.0289145	0.123624	-0.0333036	-0.194961	S. pombe SPCC895.07 /GEN=alp14 /DEF=localization spindle pole body
1777431_at	0.04544	-0.0495253	-0.174423	0.0877714	S. pombe SPAC6F6.05 /DEF=oligosaccharyltransferase (epsilon subunit) (predicted)
1776572_at	0.119794	0.0837393	-0.128784	-0.0957855	S. pombe SPCC1620.07c /DEF=sequence orphan
1770042_at	0.127393	-0.0471395	0.0191104	-0.00356483	S. pombe SPBC1D7.04 /GEN=mlo3 /DEF=TREX complex (predicted)
1772844_at	-0.0498339	-0.0361773	0.031916	0.262482	S. pombe SPAC3G9.11c /DEF=pyruvate decarboxylase (predicted)
1777117_at	0.21173	-0.19594	0.214443	-0.135177	S. pombe SPBC1198.05 /DEF=guanylate kinase (predicted)
1777401_at	0.1406	-0.0819607	0.138855	-0.23077	S. pombe SPBC17D11.05 /GEN=tif32 /DEF=translation initiation factor
1775182_at	-0.0925999	-0.011555	-0.00361347	0.145634	S. pombe SPAC4G8.08 /DEF=mitochondrial carrier
1779711_at	0.028526	0.111562	-0.338352	0.0164868	S. pombe SPAC3F10.13 /GEN=ucp6 /DEF=UBA domain
1776416_at	-0.125932	-0.283175	0.32478	0.15162	S. pombe SPBC18E5.10 /DEF=respiratory chain NADH dehydrogenase complex (subunit F) (predicted)
1776053_at	0.070296	0.0870155	-0.0961456	-0.140584	S. pombe SPAC31G5.11 /GEN=pac2 /DEF=cAMP-independent regulatory protein (PMID 8536311)
1779241_at	0.0256856	-0.0514196	0.269824	-0.149177	S. pombe SPAC26H5.02c /DEF=AAA family ATPase
1771380_at	-0.0994612	-0.0548576	0.19645	0.0199954	S. pombe SPCC18.17c /DEF=sequence orphan
1771118_at	0.231902	-0.00716495	0.323227	-0.160821	S. pombe SPAC14C4.16 /DEF=sequence orphan
1774981_at	-0.136673	-0.0175657	0.0873887	0.047699	S. pombe SPBC2A9.09 /DEF=conserved phosducin-like protein
1773705_at	0.0788933	-0.146699	0.104496	-0.0336968	S. pombe SPBP4H10.05c /GEN=spe2 /DEF=S-adenosylmethionine decarboxylase proenzyme
1775155_at	0.077522	-0.2459	0.196263	-0.0639807	S. pombe SPCC1682.04 /GEN=cdc31 /DEF=EF hand
1776850_at	-0.0538877	0.0524969	-0.151237	0.146024	S. pombe SPBC428.12c /DEF=RNA-binding protein
1776899_at	-0.00176462	-0.299175	0.922533	0.00953261	S. pombe SPBC887.08 /DEF=dubious
1769821_at	-0.0554047	0.239721	-0.405087	0.0967073	S. pombe SPCC962.03c /GEN=cut15 /DEF=karyopherin
1772071_at	0.0115417	-0.0633332	0.11509	-0.047272	S. pombe SPAC23C11.09 /DEF=alanine-tRNA ligase (predicted)
1773536_at	-0.0479921	-0.370842	0.621031	0.043156	S. pombe SPBC19C7.11 /DEF=ClC chloride channel (predicted)
1777147_at	-0.0134834	0.0676374	-0.197964	0.0545346	S. pombe SPAC1296.01c /DEF=phosphoacetylglucosamine mutase (predicted)
1772860_at	0.289757	-0.112427	0.147265	-0.17818	S. pombe SPAC22E12.14c /DEF=serinethreonine protein kinase (predicted)
1775185_at	0.117292	0.0390793	-0.139289	-0.0813535	S. pombe SPBC24C6.05 /GEN=sec28 /DEF=coatomer (epsilon subunit) (predicted)
1775768_at	0.0285002	-0.0132224	-0.0448265	0.0902357	S. pombe SPAC644.12 /GEN=cdc5 /DEF=transcriptional regulator
1769672_at	-0.0551761	0.04599	0.0477511	0.0159016	S. pombe SPAC17C9.05c /GEN=pmc3 /DEF=RNA polymerase II holoenzyme component
1769477_at	0.030254	0.113532	-0.0477235	0.0469491	S. pombe SPCC5E4.10c /DEF=sequence orphan
1770421_at	0.0537291	-0.0518163	0.0654942	-0.0575631	S. pombe SPAC3G9.03 /GEN=rpl2301 /DEF=60S ribosomal protein L23
1775365_at	-0.0850859	-0.223271	0.142471	-0.0131486	S. pombe SPBC1734.05c /GEN=spf31 /DEF=spliceosome associated protein (predicted)
1775184_at	0.163634	-0.181079	0.17011	-0.505593	S. pombe SPBC1A4.05 /DEF=hypothetical protein
1776470_at	-0.0112613	-0.00905291	0.155008	-0.00312869	S. pombe SPBC15C4.05 /DEF=ATP-dependent (predicted)
1776293_at	0.0429208	-0.0476478	0.279255	-0.00798575	S. pombe SPCC4G3.08 /GEN=psk1 /DEF=serinethreonine protein kinase
1775882_at	-0.16098	-0.0278091	-0.0225223	0.181657	S. pombe SPBC2A9.05c /DEF=conserved eukaryotic protein
1779837_at	0.0116809	0.0583172	-0.129756	-0.139533	S. pombe SPCC1281.01 /GEN=ags1 /DEF=a-1,3-glucan synthase
1772800_at	-0.221804	0.171793	-0.394946	0.0960143	S. pombe SPAC26F1.07 /DEF=aldoketo reductase
1774580_at	0.019728	-0.391534	0.259771	-0.192739	S. pombe SPAC17A5.13 /DEF=GTP cyclohydrolase (predicted)
1772599_at	0.109501	-0.0824029	-0.301255	0.0541121	S. pombe SPBC12C2.11 /DEF=glucosamine--fructose-6-phosphate aminotransferase (predicted)
1780162_at	0.0945377	-0.0864744	0.293264	-0.0114047	S. pombe SPBC365.06 /GEN=pmt3 /DEF=ubiquitin family protein
1769734_s_at	0.00303682	-0.140972	-0.129261	0.564554	S. pombe SPAC186.03 /DEF=L-asparaginase
1774252_at	0.180487	0.0498508	0.1834	-0.14761	S. pombe SPAC3H1.10 /DEF=phytochelatin synthetase (PMID 10368185) (PMID 10369673)
1779588_at	-0.11526	-0.568032	0.921322	0.039058	S. pombe SPAC513.04 /DEF=dubious
1774986_at	-0.301757	0.0758963	-0.172728	0.443674	S. pombe SPAC18G6.13 /DEF=dubious
1769533_at	0.0468272	-0.549041	0.531028	-0.0446393	S. pombe SPBPB8B6.04c /GEN=grt1 /DEF=zinc finger protein
1778580_at	0.0367161	-0.169259	0.0747973	-0.0689138	S. pombe SPCC285.15c /GEN=rps2802 /DEF=40S ribosomal protein S28
1777210_at	0.0907993	-0.0689131	0.0941582	-0.11214	S. pombe SPBC25H2.07 /GEN=tif11 /DEF=translation initiation factor
1775695_at	-0.129616	0.101217	-0.108285	0.0580358	S. pombe SPCC1682.03c /DEF=sequence orphan
1773031_at	0.140538	-0.0369864	0.0547113	-0.0800702	S. pombe SPAC1F8.08 /DEF=sequence orphan
1777728_at	0.0376654	0.0759754	-0.0646725	-0.0371119	S. pombe SPCC18.06c /DEF=CCR4-Not complex (predicted)
1775977_at	0.00513299	-0.22098	0.0929406	0.0632156	S. pombe SPBC215.08c /GEN=arg4 /DEF=carbamoyl-phosphate synthase
1773822_at	-0.364998	0.210651	-0.765851	0.318397	S. pombe SPBC8E4.04 /DEF=aldoketo reductase
1773709_at	-0.235241	0.0511916	-0.0843207	0.52369	S. pombe SPAC2E12.03c /DEF=G-protein coupled receptor activity
1780214_at	0.15013	-0.0532586	0.0322479	-0.0192258	S. pombe SPAC24B11.08c /DEF=COPII-coated vesicle component
1771225_at	0.00486469	0.079402	-0.0860532	-0.0322418	S. pombe SPCC794.11c /DEF=actin cortical patch component (predicted)
1773896_at	0.0228535	0.0110299	-0.00387414	-0.0401347	S. pombe SPAC637.05c /GEN=vma2 /DEF=V-type ATPase
1779070_at	0.0365623	-0.559555	-0.41153	0.238213	S. pombe SPCC584.16c /DEF=sequence orphan
1772056_at	0.410844	-0.283158	0.282523	-0.251039	S. pombe SPAC4A8.07c /DEF=diacylglycerol kinase
1776213_at	0.0369088	-0.0329405	0.111979	-0.170452	S. pombe SPCC1739.11c /GEN=cdc11 /DEF=SIN component
1779346_at	0.0176481	0.0611814	0.00594807	-0.138757	S. pombe SPAC3H8.06 /GEN=aur1 /DEF=inositol phosphorylceramide synthase (predicted)
1779686_at	0.0982698	0.00398827	0.239082	-0.167782	S. pombe SPBC1683.01 /DEF=inorganic phosphate transporter (predicted)
1775575_at	0.0703818	-0.154562	0.24764	-0.0509507	S. pombe SPAC343.16 /GEN=lys2 /DEF=homoaconitate hydratase
1771635_at	-0.16014	0.19958	-0.39404	0.122416	S. pombe SPCC16A11.16c /DEF=conserved eukaryotic protein
1774076_at	0.182522	-0.138165	0.662878	-0.106338	S. pombe SPCC24B10.18 /DEF=conserved eukaryotic protein
1774814_at	0.0287116	0.0385424	-0.180291	-0.0498374	S. pombe SPAC56F8.08 /GEN=mud1 /DEF=UBA domain
1772861_at	0.26801	-1.19972	0.316161	-0.775975	S. pombe SPAC1F7.05 /GEN=cdc22 /DEF=ribonucleoside reductase
1770305_at	-0.00030454	-0.0142082	-0.00805664	-0.0745309	S. pombe SPBC4B4.04 /DEF=translation initiation factor
1773544_at	0.089886	-0.269183	0.130479	-0.0185458	S. pombe SPAC23D3.14c /DEF=alpha-amylase (predicted)
1769401_at	0.099494	-0.0322971	0.225908	-0.2962	S. pombe SPBC23E6.04c /DEF=ribonucleoprotein (RNP) complex (predicted) (PMID 12068309)
1777768_at	0.0233434	-0.0780382	0.0376705	0.0488571	S. pombe SPAC3G6.08 /DEF=Erv1Alr family
1779579_at	0.00462023	-0.110832	0.0789401	-0.0104872	S. pombe SPBC405.07 /GEN=rpl3602 /DEF=60S ribosomal protein L36
1777339_at	-0.452544	-0.578284	0.145025	0.495821	S. pombe SPAC1039.02 /DEF=calcineurin-like phosphoesterase (predicted)
1775197_at	-0.107431	0.455072	-0.348105	0.163875	S. pombe SPAC521.04c /DEF=calcium permease (predicted)
1776263_at	-0.0423609	-0.129715	0.127313	0.0746441	S. pombe SPAC25A8.03c /DEF=hypothetical protein
1777870_at	0.293508	-0.128827	0.702746	-0.168489	S. pombe SPAC1093.05 /DEF=DEADDEAH box helicase
1778284_at	-0.070494	0.0457255	-0.0407362	0.0609417	S. pombe SPBC2F12.10 /DEF=mitochondrial ribosomal protein (predicted)
1776849_at	0.0904512	-0.0449162	0.120513	-0.109776	S. pombe SPAC22E12.07 /GEN=rna1 /DEF=GTPase activating protein
1772912_at	-0.0676238	0.327568	-0.0968863	0.0668573	S. pombe SPAC3F10.07c /DEF=dubious
1778803_at	-0.0136274	-0.126418	0.0820812	-0.0463247	S. pombe SPAPB1A10.15 /DEF=involved in sterol metabolism (predicted)
1772423_at	-0.0687256	-0.109128	0.0226609	0.0963125	S. pombe SPAC16E8.04c /DEF=chorismate mutase (predicted)
1772941_at	0.00545088	0.0158644	-0.409125	0.023852	S. pombe SPCC74.03c /GEN=ssp2 /DEF=serinethreonine protein kinase (predicted)
1773912_at	-0.149461	0.301408	-0.618287	-0.00760142	S. pombe SPAC17A5.09c /DEF=low similarity to human protein phosphatase inhibitor 2 and S. cerevisiae GLC8-Modulator of protein serinethreonine phosphatase-involved in control of vacuole fusion-by multiple alignment
1772435_at	-0.0614602	0.062973	-0.0780214	0.0422471	S. pombe SPCC61.04c /DEF=Rab interactor activity
1777595_at	0.118577	-0.227527	0.219961	-0.0203403	S. pombe SPAC4F8.05c /GEN=mrpl28 /DEF=mitochondrial ribosomal protein subunit YmL28
1770729_at	0.219117	-0.072437	0.498773	-0.238542	S. pombe SPCC1672.07 /DEF=WD repeat protein
1769884_at	-0.00477346	-0.0353807	0.0606353	0.0830199	S. pombe SPBC3E7.04c /DEF=pseudo
1769318_at	-0.102443	0.0606041	-0.00716146	0.124177	S. pombe SPCC830.06 /DEF=calcineurin (b subunit) (regulatory subunit) (predicted)
1779802_at	-0.139104	0.245175	-0.170489	0.0149136	S. pombe SPAC11D3.11c /DEF=pseudogene
1770069_at	-0.108164	0.0461025	-0.635487	0.0462195	S. pombe SPCC1183.11 /DEF=MS ion channel
1776279_at	-0.191837	0.075297	-0.19252	0.349967	S. pombe SPCC417.09c /DEF=transcriptional regulator (predicted)
1776804_at	-0.689424	0.823039	-0.644462	1.59814	S. pombe SPAC1399.01c /DEF=purine permease (predicted)
1774124_at	-0.00828266	0.00175254	0.0766961	-0.03147	S. pombe SPCC794.08 /DEF=hypothetical protein
1771010_at	0.308592	-0.204381	1.06496	-0.108531	S. pombe SPAC25B8.15c /DEF=conserved ACR protein
1771295_at	0.0503677	0.115094	-0.121646	-0.0329383	S. pombe SPCC622.17 /GEN=apn1 /DEF=AP endonuclease
1780048_at	0.0429014	-0.109703	-0.152824	0.118799	S. pombe SPAC57A10.09c /DEF=HMG box
1770918_at	0.205812	-0.216551	0.302431	-0.285074	S. pombe SPCC162.09c /GEN=hmg1 /DEF=3-hydroxy-3-methylglutaryl-CoA reductase (predicted)
1775763_at	-0.385259	0.0919533	0.260264	-0.0241737	S. pombe SPBC25B2.08 /DEF=sequence orphan
1770091_at	-0.0119362	0.168795	-0.159427	0.00812022	S. pombe SPBC1271.15c /DEF=translation initiation factor if-2 (predicted)
1769402_at	-0.19226	-0.110907	0.257722	-0.0655982	S. pombe SPCC825.04c /DEF=N-acetyltransferase (predicted)
1773714_at	-0.294279	0.204402	-0.402577	0.407386	S. pombe SPAC25B8.10 /DEF=methyltransferase (predicted)
1775674_at	-0.0467183	0.153365	-0.2108	0.0679808	S. pombe SPAC1F5.08c /GEN=yam8 /DEF=involved in calcium ion transport (PMID 10694511)
1769509_at	-0.375083	0.149411	-0.948347	0.215065	S. pombe SPBC1271.05c /DEF=zinc finger protein
1775328_at	-0.0205962	-0.0139805	0.438635	-0.0715243	S. pombe SPAC688.14 /DEF=transcriptional regulator (predicted)
1778490_at	0.0484301	0.0155036	-0.137491	0.00693417	S. pombe SPAC1805.08 /GEN=dlc1 /DEF=dynein light chain
1778917_at	-0.0127211	-0.0227	0.0153933	0.0772473	S. pombe SPAC19A8.15 /GEN=trp2 /DEF=tryptophan synthase
1770176_at	0.00584761	0.0928872	0.00511964	-0.175776	S. pombe SPBC1734.07c /DEF=TRAPP (predicted)
1777494_at	0.0565656	-0.133097	-0.158847	0.0183884	S. pombe SPBC4F6.12 /DEF=LIM domain
1773489_at	-0.0274115	-0.0504389	0.0221011	0.0130698	S. pombe SPAC1952.16 /GEN=rga9 /DEF=FCH domain
1771424_at	0.0450211	-0.0436195	0.382974	-0.694075	S. pombe SPBC26H8.10 /GEN=dis3 /DEF=3-5 exoribonuclease (subunit) (predicted)
1776816_at	-0.103937	-0.0691052	-0.295275	0.176102	S. pombe SPAC17C9.16c /DEF=membrane transporter
1775731_at	-0.0868883	0.0728051	-0.030283	0.0237748	S. pombe SPAC22F3.07c /DEF=ATP synthase (subunit G)
1773700_at	0.179668	-0.125614	0.119783	-0.3051	S. pombe SPCC1827.02c /DEF=cholinephosphate cytidylyltransferase (predicted)
1778874_at	-0.0914898	-0.134787	0.301292	0.0524718	S. pombe SPCC777.04 /DEF=amino acid transporter (predicted)
1773274_at	0.158272	-0.166265	0.144826	-0.356225	S. pombe SPBP23A10.09 /DEF=GINS complex (predicted)
1770350_at	0.0942386	-0.11987	0.225585	-0.0677865	S. pombe SPAC24H6.10c /DEF=phospho-2-dehydro-3-deoxyheptonate aldolase (predicted)
1771939_at	-0.345308	0.182408	-0.271284	0.468831	S. pombe SPCC1919.06c /GEN=wtf25 /DEF=wtf element
1774784_at	0.169051	-0.114683	0.450045	-0.119976	S. pombe SPCP1E11.07c /GEN=cwf18 /DEF=conserved eukaryotic protein
1777770_at	-0.112396	-0.0196746	0.138839	-0.0065136	S. pombe SPBC1703.09 /DEF=coiled-coil (region) (predicted)
1778302_at	0.146919	-0.202811	0.390145	-0.077788	S. pombe SPCC126.11c /DEF=RNA-binding protein
1776683_at	0.116563	-0.0594285	0.297701	-0.329752	S. pombe SPAC3C7.08c /GEN=elf1 /DEF=AAA family ATPase
1772478_at	-0.06895	0.128745	-0.544087	0.0505473	S. pombe SPBC21B10.07 /DEF=glycosyl hydrolase family 16
1770702_at	0.252081	-0.0280174	0.547947	-0.228883	S. pombe SPAP8A3.02c /DEF=conserved protein
1775656_at	0.0257975	0.0507199	-0.0212339	-0.0291821	S. pombe SPBC947.02 /GEN=apl2 /DEF=adaptin
1776364_at	0.11411	-0.0729497	0.378981	-0.043368	S. pombe SPBC28F2.05c /DEF=aldoketo reductase
1770482_at	0.098176	-0.199244	0.215468	0.062863	S. pombe SPAC24B11.09 /DEF=conserved eukaryotic protein
1773115_at	0.187814	-0.290792	0.854659	-0.229329	S. pombe SPAC7D4.08 /DEF=dubious
1769396_at	0.0187775	-0.04824	0.00723648	0.0444028	S. pombe SPBC3F6.03 /GEN=trr1 /DEF=thioredoxin reductase
1779870_at	-0.0599848	0.0490602	0.0450977	0.0475222	S. pombe SPAC16A10.03c /GEN=vps11 /DEF=involved in intracellular protein transport (predicted)
1770094_at	-0.0564378	-0.0306517	0.222698	-0.0887429	S. pombe SPBC691.02c /DEF=Rad50p interacting protein (predicted)
1777781_at	-0.208282	-0.509539	0.506373	0.106841	S. pombe SPCP20C8.02c /DEF=33896 domain
1770051_s_at	-0.136144	-0.177089	0.325704	0.041523	S. pombe SPCP20C8.02c /DEF=33896 domain
1772085_at	-0.110065	0.159573	-0.251575	-0.0121889	S. pombe SPCC1739.03 /DEF=DEADDEAH box helicase (predicted)
1769593_at	0.0965805	-0.00652536	0.0169071	-0.323713	S. pombe SPAC31G5.01 /GEN=sap49 /DEF=RNA-binding protein
1769784_at	0.0854692	0.205194	-0.249581	-0.208457	S. pombe SPAC664.10 /DEF=kinesin-like protein
1778217_at	-0.00296021	-0.18812	0.115692	-0.0615053	S. pombe SPAC22E12.02 /DEF=RNA-binding protein
1774298_at	0.0263154	-0.0254895	0.00280317	-0.0402139	S. pombe SPAC1071.10c /GEN=pma1 /DEF=P-type proton ATPase (PMID 12707717)
1775010_at	-0.109877	0.0575205	0.10631	-0.144748	S. pombe SPAC17A5.05c /DEF=sequence orphan
1772272_at	-0.0899178	-0.217625	0.551173	-0.0688213	S. pombe SPCC4B3.08 /DEF=sequence orphan
1775296_at	0.0136407	-0.0178035	0.0227073	-0.033287	S. pombe SPAC18G6.14c /GEN=rps7 /DEF=40S ribosomal protein S7
1773534_at	0.0111777	-0.10732	-0.0149641	0.128167	S. pombe SPBC1683.11c /DEF=isocitrate lyase (predicted)
1774439_at	-0.0314344	-0.173266	0.169212	-0.0150258	S. pombe SPCC188.03 /GEN=cnd3 /DEF=condensin subunit (PMID 10485849)
1770537_at	0.101404	0.0232385	-0.158355	-0.0505333	S. pombe SPAC6G9.11 /GEN=syb1 /DEF=synaptobrevin (PMID 12565827)
1777529_at	0.044343	0.0121651	-0.225232	-0.0330922	S. pombe SPAC1093.01 /DEF=PPR domains
1775119_at	-0.257974	0.0817156	-1.02906	0.319057	S. pombe SPCC417.05c /GEN=cfh2 /DEF=Chs Four Homologue (pers. comm. Henar Montero)
1775212_s_at	0.514055	-0.244214	1.45601	-0.308644	S. pombe SPCC1450.08c /GEN=wtf16 /DEF=wtf element
1775084_at	-0.238178	0.188022	-0.704967	0.0952368	S. pombe SPBC9B6.03 /DEF=zinc finger protein
1774916_at	0.0708507	-0.185313	0.475669	0.0692533	S. pombe SPAP27G11.15 /GEN=slx1 /DEF=stucture-specific endonuclease (catalytic subunit) (PMID 14528010)
1773070_at	0.160284	-0.0991414	0.494814	-0.360273	S. pombe SPAC664.08c /DEF=involved in intracellular protein transport
1774815_at	-0.0152445	-0.0298157	0.210879	-0.0532319	S. pombe SPAC31A2.16 /GEN=gef2 /DEF=RhoGEF
1769567_at	-0.180638	-0.305524	-0.363026	0.712473	S. pombe SPBC1773.17c /DEF=glycerate and formate dehydrogenase (predicted)
1773200_at	0.0586678	-0.056757	0.315315	-0.0274487	S. pombe SPCC970.01 /GEN=rad16 /DEF=ss DNA endonuclease
1776200_x_at	-0.257678	-0.42078	0.272931	0.108953	S. pombe SPCC794.02 /GEN=wtf5 /DEF=wtf element
1772044_at	0.0436182	0.0519149	0.0167875	-0.169152	S. pombe SPBC1A4.10c /GEN=pmc1 /DEF=RNA polymerase II holoenzyme component (PMID 11572939)
1778727_at	-0.181871	0.0650059	-0.427572	0.373304	S. pombe SPAC4G8.10 /GEN=gos1 /DEF=SNARE
1770064_at	0.0246159	-0.0445512	0.0488558	-0.107503	S. pombe SPCC550.14 /DEF=RNA-binding protein
1777671_at	-0.0449705	-0.0742652	0.314021	-0.0499366	S. pombe SPAC2F7.17 /DEF=peptide chain release factor (predicted)
1776066_at	-0.0282186	0.127099	-0.0554304	0.0086298	S. pombe SPBC409.06 /GEN=uch2 /DEF=ubiquitin C-terminal hydrolase activity
1777520_at	0.151022	0.156525	-0.0722078	-0.139993	S. pombe SPAC890.02c /GEN=alp7 /DEF=coiled-coil (predicted)
1775134_at	-0.0633361	0.142045	-0.0644697	0.21293	S. pombe SPCC550.07 /DEF=acetamidase (predicted)
1779693_at	-0.113441	-0.145735	0.00663439	0.206436	S. pombe SPAC13G6.05c /DEF=TRAPP (predicted)
1774956_at	0.139984	-0.0218436	0.43198	-0.241495	S. pombe SPBC16D10.02 /DEF=DNA methyltransferase (predicted)
1779501_at	-0.505739	0.506553	-1.14359	0.338361	S. pombe SPAPB24D3.08c /DEF=NADP dependent oxidoreductase (predicted)
1778642_at	-0.56633	0.196676	-0.419071	0.847413	S. pombe SPAC3H1.06c /DEF=transporter (predicted)
1770465_at	-0.151815	0.162315	-0.0371866	0.216095	S. pombe SPBC1706.03 /DEF=GTPase activity (ISS)
1770675_at	-0.0271702	-0.0532401	-0.265632	0.148247	S. pombe SPAC1D4.13 /GEN=byr1 /DEF=serinethreonine protein kinase
1775627_at	0.0364043	-0.0399081	0.00600783	0.0444854	S. pombe SPAC27D7.06 /DEF=electron transfer flavoprotein (alpha subunit) (predicted)
1775804_at	0.033576	-0.0220553	0.062226	0.00277932	S. pombe SPAC19A8.12 /DEF=pyrophosphatase (predicted)
1777766_at	-0.104644	0.0794105	-0.142319	0.147108	S. pombe SPAC630.12 /DEF=serinethreonine protein phosphatase (predicted)
1772906_at	0.0281076	0.0370973	-0.299116	-0.00979773	S. pombe SPAC5D6.04 /DEF=auxin family
1773114_at	-0.133529	0.0193361	-0.100738	0.117523	S. pombe SPBC15C4.02 /DEF=ABC1 family
1780051_at	0.0266905	-0.0939258	0.0586828	-0.00470352	S. pombe SPAC1952.11c /GEN=ure2 /DEF=urease (PMID 9301025)
1779776_at	0.184857	-0.0556122	0.355204	-0.072677	S. pombe SPCC285.12 /GEN=lsm7 /DEF=U6 snRNA-associated protein
1775159_at	0.129767	0.0137307	-0.0457843	-0.248576	S. pombe SPCC736.12c /DEF=hypothetical protein
1774140_at	-0.0659211	-0.0373837	0.0188828	0.0861661	S. pombe SPCC1235.04c /DEF=FMN adenylyltransferase activity (predicted)
1775714_at	0.0708828	0.127323	-0.0566343	-0.0560582	S. pombe SPBC776.06c /DEF=sequence orphan
1775192_at	-0.0419165	0.0212886	-0.0919034	-0.0121206	S. pombe SPCC737.06c /DEF=aldoketo reductase (predicted)
1772197_at	0.087671	0.0560459	-0.15969	-0.0928033	S. pombe SPBC16A3.03c /DEF=sequence orphan
1775604_at	0.103918	-0.0729809	0.322869	-0.261751	S. pombe SPBC1A4.07c /DEF=WD repeat protein
1776527_at	-0.0809043	-0.0397148	0.102518	-0.00901031	S. pombe SPBC646.03 /DEF=glutamyl-tRNA amidotransferase complex (predicted)
1776602_at	-0.447077	0.313928	-0.644533	0.363371	S. pombe SPCC285.04 /DEF=transthyretin (predicted)
1773121_at	-0.0321989	0.0165211	0.0462926	0.00543213	S. pombe SPCC162.12 /DEF=serine-rich protein
1775367_at	-0.147978	0.0599524	-0.0330165	0.060729	S. pombe SPAC23C11.15 /GEN=pst2 /DEF=SIN3 family co-repressor
1775169_at	0.239817	-0.145006	0.830172	-0.108409	S. pombe SPAC589.03c /DEF=hypothetical protein
1779178_at	0.144664	0.0231326	0.0441316	-0.210899	S. pombe SPCC4G3.09c /GEN=gyp3 /DEF=TBC domain protein
1769689_at	-0.347931	0.322721	-0.609488	0.372054	S. pombe SPBC19F8.07 /GEN=crk1 /DEF=serinethreonine protein kinase
1770161_at	-0.262113	0.109803	-0.70122	0.102992	S. pombe SPCP1E11.05c /DEF=sterol O-acyltransferase (predicted)
1769454_at	0.0269756	-0.11679	0.319223	-0.00228977	S. pombe SPAC823.11 /DEF=sphingosine-1-phosphate phosphatase activity (predicted)
1779862_at	-0.152298	0.0281267	-0.162964	0.0981563	S. pombe SPAC4F8.01 /DEF=involved in intracellular protein transport
1770165_at	-0.0100552	-0.213467	0.20863	-0.0078036	S. pombe SPCC1753.05 /DEF=sequence orphan
1773775_at	0.0319411	-0.200141	-0.759492	0.305647	S. pombe SPAC18B11.03c /DEF=N-acetyltransferase (predicted)
1769354_at	0.125103	-0.0932871	-0.631477	0.121836	S. pombe SPCC1183.09c /DEF=UPF0057 family
1773367_at	0.0348155	-0.0182454	-0.306217	0.13963	S. pombe SPBC1289.06c /DEF=sequence orphan
1773407_at	0.0393724	0.0225267	-0.095535	-0.0449622	S. pombe SPCC1840.02c /GEN=bgs4 /DEF=1,3-beta-glucan synthase (subunit) (predicted)
1779967_at	0.109964	-0.018294	0.244869	-0.123411	S. pombe SPCC645.04 /DEF=sequence orphan
1774881_at	-0.0113707	-0.0295086	0.0960592	-0.11643	S. pombe SPAC20H4.03c /GEN=tfs1 /DEF=transcription elongation factor TFIIS (PMID 8904334)
1770110_at	0.186456	-0.204817	0.489384	-0.0876265	S. pombe SPBC18H10.07 /DEF=small nuclear ribonucleoprotein (snRNP) (predicted) (pers. comm. J.A. Potashkin)
1777250_at	0.00224336	0.00463422	-0.173214	-0.00575256	S. pombe SPAC6F12.09 /GEN=rdr1 /DEF=RNA-directed RNA polymerase
1774408_at	-0.00130526	0.0356433	-0.133096	0.0306482	S. pombe SPAC1250.03 /GEN=ubc14 /DEF=ubiquitin conjugating enzyme
1772175_at	-0.00300662	-0.0293201	0.0893761	0.0149012	S. pombe SPCC569.06 /DEF=similar to S. pombe SPCC61.05 and SPAC26H5.07C
1773880_at	0.00147216	-0.377818	0.55101	-0.036108	S. pombe SPBC4F6.11c /DEF=asparagine synthase (predicted)
1772663_at	-0.00622082	0.0401656	-0.10603	0.00277583	S. pombe SPBC2G5.04c /DEF=COPII-coated vesicle component (predicted)
1769826_at	0.173049	0.114561	-0.138283	-0.155247	S. pombe SPCC1322.03 /DEF=conserved fungal protein
1776307_at	0.0355822	0.010836	-0.1058	0.0589714	S. pombe SPCC16A11.14 /GEN=sfh1 /DEF=involved in transcriptional regulation (predicted)
1778166_at	-0.135569	-0.024924	0.0886049	0.0237242	S. pombe SPCC777.03c /DEF=nifs homolog
1773422_at	0.00839424	-0.187615	0.15395	0.0108938	S. pombe SPBC3B9.08c /DEF=mago-nashi homolog
1780050_at	-0.103876	0.146439	-0.183099	0.123576	S. pombe SPAC16E8.09 /GEN=scd1 /DEF=guanyl-nucleotide exchange factor activity
1779047_at	0.0976798	0.123278	-0.215456	-0.086119	S. pombe SPAC17A2.09c /GEN=csx1 /DEF=RNA-binding protein
1778361_at	-0.141669	-0.266278	0.400673	0.112639	S. pombe SPBC660.15 /DEF=RNA-binding protein
1776177_at	-0.0796614	0.223271	-0.115902	-0.152241	S. pombe SPBC3B9.01 /DEF=hypothetical protein
1775584_at	-0.0840664	0.0689449	-0.160563	0.105692	S. pombe SPAC24C9.14 /DEF=OTU-like cysteine protease (predicted)
1776591_at	0.191315	-0.0640059	0.277817	-0.293486	S. pombe SPAC1A6.09c /GEN=lag1 /DEF=longevity-assurance protein 1
1779733_at	-0.192312	0.147912	-0.537923	0.0695286	S. pombe SPBC947.15c /DEF=NADH dehydrogenase (predicted)
1769546_at	-0.0165259	-0.203003	0.40115	0.00385094	S. pombe SPCC191.09c /GEN=gst1 /DEF=glutathione S-transferase (PMID 12063243)
1773048_at	0.00304031	-0.0585044	0.15071	0.015741	S. pombe SPBC887.07 /GEN=mrpl38 /DEF=mitochondrial ribosomal protein subunit YmL34YmL38
1770206_at	0.116649	0.0606922	-0.0704927	-0.243322	S. pombe SPAC16A10.07c /GEN=taz1 /DEF=involved in telomere maintenance
1771280_at	-0.0608842	0.0731119	-0.145332	0.0795027	S. pombe SPAC1142.02c /DEF=conserved protein
1775382_at	0.00841014	-0.00807349	0.0163835	-0.0382722	S. pombe SPAC1805.11c /GEN=rps2602 /DEF=40S ribosomal protein S26
1772546_at	-0.0312732	0.0973425	-0.113677	0.018453	S. pombe SPAC19A8.02 /DEF=pleckstrin homology domain
1773824_at	0.00992171	0.19584	-0.275565	0.35798	S. pombe SPBC3E7.13c /DEF=involved in mRNA splicing (predicted)
1769705_at	-0.0137479	0.224114	-0.197794	0.0273326	S. pombe SPAC3H5.11 /DEF=NADNADH kinase (predicted)
1779415_at	0.42368	0.239815	-0.089214	-0.718139	S. pombe SPAC22E12.12 /DEF=dubious
1775920_at	-0.0874189	0.123752	-0.238134	0.0728245	S. pombe SPAC17A2.05 /DEF=fumerate reductase (predicted)
1776012_at	-0.0127153	0.00333627	-0.0495399	0.0173238	S. pombe SPAC29E6.09 /DEF=sequence orphan
1776185_at	0.024999	-0.030139	0.050216	-0.0112384	S. pombe SPBC839.13c /GEN=rpl1601 /DEF=60S ribosomal protein L13L16
1777068_at	0.0245015	-0.021301	-0.0517861	0.0301901	S. pombe SPAC2G11.07c /GEN=ptc3 /DEF=serinethreonine protein phosphatase
1778533_at	0.0230802	-0.253576	0.156597	-0.0171083	S. pombe SPAC9E9.03 /GEN=leu2 /DEF=3-isopropylmalate dehydratase (predicted)
1771494_at	-0.101202	0.0711829	-0.562475	0.107064	S. pombe SPAC6F12.03c /GEN=fsv1 /DEF=SNARE (PMID 14575697)
1779127_at	0.159994	-0.101759	0.0885849	-0.228778	S. pombe SPBC119.12 /DEF=involved in intracellular protein transport
1769939_s_at	0.00317446	-0.00324059	0.00665601	0.000900586	S. pombe SPCC16C4.13c /GEN=rpl1201 /DEF=60S ribosomal protein L12.1L12A
1775336_at	-0.183034	0.224033	-0.559429	0.167993	S. pombe SPAP14E8.04 /DEF=metallo peptidase
1773038_at	0.576649	-0.0382948	-0.0837472	0.0567315	S. pombe SPBC1709.01 /GEN=chs2 /DEF=chitin synthase family
1778005_at	0.0166337	-0.180884	-0.779716	0.134508	S. pombe SPAC2F3.01 /DEF=involved in glycosphingolipid biosynthesis (predicted)
1775115_at	0.296454	-0.122875	0.719754	-0.0857588	S. pombe SPAC30C2.02 /GEN=mmd1 /DEF=HEAT repeat
1769814_at	0.24604	-0.0920521	0.663816	-0.358622	S. pombe SPAC10F6.10 /DEF=protein kinase (RIO family) (PMID 12135737)
1779469_at	0.0510645	-0.0956863	0.0516135	0.0108716	S. pombe SPAC1687.04 /DEF=conserved eukaryotic protein
1769553_at	0.112393	-0.683786	0.250995	-0.155587	S. pombe SPBC1105.12 /GEN=h4.3 /DEF=histone H4
1775735_x_at	0.079339	-0.692782	0.149638	-0.143548	S. pombe SPBC1105.12 /GEN=h4.3 /DEF=histone H4
1774890_at	-0.048069	-0.0503254	0.10295	0.237106	S. pombe SPBC1604.16c /DEF=hypothetical protein
1769755_at	-0.300122	0.0157223	-0.0388543	0.0511452	S. pombe SPAC6F12.14 /GEN=cut23 /DEF=anaphase-promoting complex (APC) (PMID 10526233)
1778211_at	-0.0191072	-0.180235	0.134556	-0.0171118	S. pombe SPBC31F10.12 /DEF=PUA domain
1777125_at	-0.104133	0.0663735	-0.259018	-0.0262009	S. pombe SPAC13D6.05 /GEN=alp11 /DEF=localization cytoskeleton
1779069_at	0.00315285	-0.0372766	0.0627069	-0.286369	S. pombe SPBC244.01c /GEN=sid4 /DEF=SIN component (PMID 9649519)
1779969_at	0.122724	0.0078942	-0.126762	0.0489461	S. pombe SPBC8D2.11 /DEF=hypothetical protein
1777437_at	-0.00988134	0.0280364	-0.0846599	-0.0181691	S. pombe SPBC1685.03 /DEF=signal peptidase activity (predicted)
1776741_at	0.0665372	0.00498994	0.0400337	-0.0725063	S. pombe SPAC20H4.04 /DEF=DEADDEAH box helicase
1778032_at	-0.121226	-0.0429529	0.13944	0.00670274	S. pombe SPBC839.03c /DEF=hypothetical protein
1772708_at	0.0789951	-0.170707	-0.596429	0.256579	S. pombe SPBC19F8.06c /GEN=meu22 /DEF=meiotic expression upregulated
1770425_at	0.126015	-0.132474	-0.117403	0.669597	S. pombe SPBC1861.06c /GEN=B8647-1 /DEF=Pfam-B_8647 domain
1774212_at	0.0612427	-0.151221	0.0529881	-0.0585009	S. pombe SPBC3H7.10 /DEF=conserved eukaryotic protein
1777459_at	0.0283826	-0.0624781	0.240139	-0.0937789	S. pombe SPCC1223.01 /DEF=zinc finger protein
1775911_at	-0.0875854	0.0316016	0.00120449	0.0603523	S. pombe SPAC15E1.05c /DEF=ethanolamine-phosphate cytidylyltransferase activity (predicted)
1777729_at	0.0337365	-0.409047	0.47328	0.0123943	S. pombe SPBC146.08c /DEF=translation initiation factor
1775818_at	0.00971317	0.0203787	0.078488	-0.0303249	S. pombe SPAC227.12 /DEF=WD repeat protein
1769569_at	-0.0588102	-0.141279	0.532056	0.109676	S. pombe SPCC548.04 /DEF=ubiquitin family protein
1770260_at	-0.0502459	-0.249677	0.19344	0.036898	S. pombe SPAC56F8.04c /GEN=coq2 /DEF=para-hydroxybenzoate--polyprenyltransferase activity (PMID 11092853)
1776559_at	0.0755692	-0.0807629	0.143578	-0.0965315	S. pombe SPAC1002.13c /GEN=psu1 /DEF=beta-glucosidase (predicted)
1772306_at	-0.116011	0.0906566	-0.262523	0.0836941	S. pombe SPCC16C4.10 /DEF=6-phosphogluconolactonase (predicted)
1770370_at	0.109764	-0.13712	0.322175	-0.0568123	S. pombe SPAC6F12.10c /GEN=ade3 /DEF=phosphoribosylformylglycinamidine synthase (predicted)
1775323_at	0.0713612	-0.059035	0.0554771	-0.0931841	S. pombe SPCC4B3.09c /DEF=mitochondrial ribosomal protein subunit l12
1775779_at	0.0716124	-0.0728315	0.231513	-0.147339	S. pombe SPBC1703.02 /DEF=chromatin remodeling complex (predicted)
1771946_at	-0.059117	0.0224997	-0.00882276	0.0456416	S. pombe SPAC6G9.06c /GEN=pcp1 /DEF=gamma tubulin complex (associated with) (PMID Venkatram et al in press)
1778422_at	0.0602509	-0.00371933	-0.0549326	-0.00627327	S. pombe SPAC589.06c /DEF=localization membrane (predicted)
1779970_at	0.0121861	-0.013895	0.000851313	0.00865396	S. pombe SPAC9.09 /DEF=homocysteine methyltransferase
1770893_at	-0.0651995	0.141214	0.0379381	0.0844863	S. pombe SPBC336.08 /DEF=localization spindle pole body (predicted)
1777508_at	-0.118976	0.0851781	-0.099975	0.0314334	S. pombe SPBP22H7.05c /DEF=TAT-binding protein homolog
1779728_at	-0.127472	0.10591	0.0295684	-0.0949434	S. pombe SPBC19C7.09c /GEN=uve1 /DEF=endonuclease activity (PMID 8065916)
1771485_at	0.0274293	0.0236762	-0.098512	0.0224422	S. pombe SPAPB1A11.04c /DEF=transcriptional regulator (predicted)
1777324_at	0.0338211	0.0159683	0.172948	-0.10058	S. pombe SPAC22A12.03c /GEN=csn4 /DEF=COP9signalosome complex (subunit 4) (PMID 11854407)
1772591_at	0.0694052	-0.085392	0.179467	-0.157284	S. pombe SPBC31F10.07 /DEF=similar to S. cerevisiae YCL034W
1769577_at	0.0142889	-0.188568	0.345271	0.0128756	S. pombe SPBC106.12c /DEF=RNA-binding protein
1771116_at	0.170382	-0.00891209	0.249187	-0.301799	S. pombe SPAC17G6.17 /GEN=pof8 /DEF=F-box protein
1771570_at	0.0240234	0.0181246	-0.0112845	-0.0994784	S. pombe SPBC27B12.10c /GEN=tom7 /DEF=mitochondrial TOM complex component
1772702_at	0.0802307	-0.0454896	0.0995595	-0.100581	S. pombe SPAC630.13c /GEN=tsc2 /DEF=tuberin
1773835_at	0.08347	-0.0503384	0.108429	-0.0797291	S. pombe SPCC1795.11 /GEN=sum3 /DEF=DEADDEAH box helicase
1780223_at	-0.659998	0.208224	-1.39791	0.35377	S. pombe SPAC29A4.17c /DEF=conserved eukaryotic protein
1771360_at	-0.227973	0.0641247	-0.0486228	-0.0203206	S. pombe SPBP8B7.28c /DEF=sequence orphan
1778747_at	-0.0424175	0.187812	-0.3072	0.0415503	S. pombe SPCC736.11 /GEN=ago1 /DEF=argonaute
1769969_at	0.0795126	-0.0262381	-0.0873922	0.121533	S. pombe SPBC1271.13 /GEN=mrpl8 /DEF=mitochondrial ribosomal protein subunit YmL8
1774683_at	-0.0797799	0.0347182	0.0460806	-0.0167675	S. pombe SPBP16F5.02 /GEN=mcs2 /DEF=cyclin
1779585_at	-0.0195948	-0.48788	0.166423	0.393427	S. pombe SPBC1348.12 /DEF=zinc finger protein
1771434_at	0.0776421	0.0423075	0.0273196	0.0133473	S. pombe SPBC1D7.01 /DEF=prefoldin (subunit 1) (predicted)
1770530_at	0.130152	-0.129718	0.203726	0.0301215	S. pombe SPAC3G9.02 /DEF=3-oxoacyl-(acyl carrier protein) reductase activity (predicted)
1770755_at	-0.190274	0.0391127	0.0312166	0.0095094	S. pombe SPAC1783.06c /DEF=similar to S. cerevisiae YBR217W
1777169_at	-0.0199445	0.265991	-0.122082	-0.00937653	S. pombe SPBC29A3.05 /DEF=zinc finger protein
1777883_at	0.13226	-0.190574	0.504568	-0.0590022	S. pombe SPBC1105.06 /GEN=pmc4 /DEF=RNA polymerase II holoenzyme component (PMID 10625684)
1771181_at	0.431667	-0.0432642	0.988544	0.0225089	S. pombe SPMIT.09 /GEN=atp8 /DEF=ATPase (subunit 8)
1770901_at	0.324357	-0.299353	0.0402568	-0.123255	S. pombe SPBC27.05 /DEF=sequence orphan
1779948_at	0.131782	-0.0694892	0.150201	-0.101137	S. pombe SPAC24C9.12c /DEF=serine hydroxymethyltransferase (predicted)
1772614_at	-0.217124	0.133663	-0.20875	0.084082	S. pombe SPAC12B10.05 /DEF=metallopeptidase (predicted)
1772825_at	0.0417436	-0.0581131	0.340304	-0.0549698	S. pombe SPCP1E11.08 /DEF=ribosomal protein (S8E subunit) (predicted)
1773937_at	0.0110162	-0.132512	0.359712	0.0124477	S. pombe SPCC584.14 /DEF=conserved eukaryotic protein
1775867_at	0.132004	-0.0663977	0.127644	-0.183115	S. pombe SPAC644.16 /DEF=RNA-binding protein
1770083_at	-0.0742963	0.00199699	0.0126562	0.0089318	S. pombe SPAC23E2.01 /GEN=fep1 /DEF=iron-sensing transcriptional regulator
1777577_at	-0.118391	-0.169522	0.152961	-0.00640233	S. pombe SPBC1921.07c /DEF=hypothetical protein
1771698_at	0.100336	-0.0142635	-0.0121218	-0.0146093	S. pombe SPAC24H6.13 /DEF=DUF221
1779260_at	-0.0404628	0.0355953	-0.157856	0.00741831	S. pombe SPAC1F5.02 /DEF=protein disulfide isomerase (predicted)
1770857_at	0.00244713	0.0131496	0.0167027	-0.0935723	S. pombe SPBC336.01 /GEN=fdh1 /DEF=DNA helicase
1769497_at	0.0438245	0.240799	-0.0262947	-0.0305125	S. pombe SPBC3D6.11c /GEN=slx8 /DEF=zinc finger protein
1771053_at	0.266725	-0.0753015	0.626627	-0.277605	S. pombe SPBC1711.16 /DEF=WD repeat protein
1779500_at	-0.0446927	-0.0245546	0.0356655	-0.0301584	S. pombe SPBC14C8.15 /DEF=triglyceride lipase-cholesterol esterase (predicted)
1776533_at	-0.11567	0.142495	-0.138634	0.0940472	S. pombe SPAPB1A10.12c /DEF=D-arabinono-1,4-lactone oxidase activity (predicted)
1769641_at	0.0582835	-0.106782	0.23199	-0.116685	S. pombe SPAC23G3.04 /DEF=hypothetical protein
1770208_at	0.0385682	0.0902726	-0.247516	-0.0197891	S. pombe SPAC12G12.03 /DEF=RNA-binding protein
1779685_at	0.111902	-0.0731837	0.113863	-0.0925461	S. pombe SPBC16D10.09 /GEN=pcn1 /DEF=PCNA (PMID 1361173)
1780225_at	-0.033047	0.0101426	0.0531638	0.0425018	S. pombe SPBC16A3.12c /DEF=triglyceride lipase-cholesterol esterase (predicted)
1769953_at	0.16376	-0.508182	0.711439	-0.0572433	S. pombe SPAC4C5.01 /DEF=haloacid dehalogenase (predicted)
1771354_at	-0.141194	0.00853157	0.0923281	0.0444082	S. pombe SPAC4A8.08c /DEF=valine-tRNA ligase (predicted)
1775792_at	-0.0572364	-0.0888389	0.176833	-0.237427	S. pombe SPAC9.11 /DEF=hypothetical protein
1777280_at	-0.0222702	-0.0870431	0.185406	-0.0306635	S. pombe SPBC3D6.09 /GEN=dpb4 /DEF=DNA polymerase epsilon (4th subunit) (predicted)
1774702_at	0.0204948	-0.00360584	0.00964483	-0.133183	S. pombe SPAP27G11.10c /GEN=nup184 /DEF=nucleoporin
1770331_at	0.0534061	0.0707979	-0.284602	0.0628824	S. pombe SPAC7D4.12c /DEF=hypothetical protein
1772652_at	-0.0444978	0.1147	-0.110725	0.0442022	S. pombe SPBC17D11.02c /DEF=zinc finger protein
1769457_at	0.05793	-0.0545273	0.244591	-0.129922	S. pombe SPBC557.03c /GEN=pim1 /DEF=GDPGTP exchange factor (RanGEF) (predicted)
1772425_at	-0.293225	0.0839736	-1.19192	0.17566	S. pombe SPAC19G12.09 /DEF=oxidoreductase (predicted)
1772623_at	0.0926491	-0.0785402	0.219376	-0.0654179	S. pombe SPBC2G5.01 /DEF=hypothetical protein
1777265_at	-0.0464757	0.0295118	0.016271	-0.0930115	S. pombe SPAC23H4.08 /DEF=sequence orphan
1773083_at	-0.198688	0.203187	-0.363111	0.0544319	S. pombe SPAC1F3.03 /DEF=WD repeat protein
1779397_at	-0.0658878	0.149227	-0.162098	0.050889	S. pombe SPCC1620.03 /DEF=sequence orphan
1774065_at	-0.247676	0.25591	-0.43103	-0.177115	S. pombe SPBC36.02c /DEF=unknown specificity
1776052_at	0.0228713	0.130515	-0.201611	0.0127904	S. pombe SPAC1B9.02c /GEN=sck1 /DEF=serinethreonine protein kinase
1771654_at	-0.0905504	-0.00603644	-0.0995982	0.268201	S. pombe SPAC16A10.05c /DEF=DASH complex (predicted)
1775120_at	0.0133657	0.00497913	0.241511	-0.137258	S. pombe SPAC1B3.09c /DEF=involved in ribosome biogenesis and assembly (predicted)
1771300_at	-2.12692	-2.73436	2.48923	2.84896	S. pombe SPAC513.03 /GEN=mfm2 /DEF=M-factor precursor (PMID 8196631)
1771571_at	-0.0076472	-0.0940021	0.0059096	0.0647046	S. pombe SPCC777.09c /GEN=arg1 /DEF=acetylornithine aminotransferase
1770703_at	-0.25931	0.153821	-0.452376	-0.00794792	S. pombe SPAC23C11.16 /GEN=plo1 /DEF=serinethreonine protein kinase
1779390_at	0.0457045	-0.0798321	0.0278082	0.28807	S. pombe SPAC15A10.01 /DEF=ABC transporter family
1769629_at	-0.173957	0.0168409	-0.0850007	0.123755	S. pombe SPAP14E8.05c /DEF=conserved eukaryotic protein
1773077_at	-0.091663	0.0429808	-0.230783	0.0590944	S. pombe SPCC14G10.03c /DEF=proteasome maturation factor (predicted)
1779382_at	-0.0645717	0.196851	-0.263759	0.0787512	S. pombe SPAC23A1.17 /DEF=adaptor protein (PMID 11901111)
1769849_at	0.0841201	-0.424848	0.967433	-0.105542	S. pombe SPAC26A3.03c /DEF=hypothetical protein
1776818_at	-0.202538	-0.0281137	0.0591065	0.0779142	S. pombe SPBP8B7.08c /DEF=leucine carboxyl methyltransferase (predicted)
1771480_at	0.0129833	-0.0800982	0.190438	-0.181352	S. pombe SPAC11G7.06c /GEN=B8647-2 /DEF=Pfam-B_8647 domain
1773814_at	-0.177988	0.260791	-0.493385	0.136869	S. pombe SPBC12C2.08 /DEF=dynamin family
1770874_at	0.0620794	-0.0265951	0.13361	-0.0475686	S. pombe SPBC725.05c /DEF=nucleotide pyrophosphatase (predicted)
1772024_at	-0.162641	0.000612577	-0.119741	0.174882	S. pombe SPBC3E7.06c /DEF=transporter
1778844_at	-0.0551529	0.0651353	-0.0508216	0.0346867	S. pombe SPCC4G3.07c /DEF=zinc finger protein
1772360_at	0.137281	-0.0630417	0.0397377	-0.314925	S. pombe SPAC637.11 /DEF=RNA helicase (predicted)
1774745_at	-0.248931	0.157355	-0.228089	0.374317	S. pombe SPCC663.02 /GEN=wtf14 /DEF=wtf element
1771811_at	-0.358423	-0.0341918	0.176146	0.0530008	S. pombe SPAC323.01c /DEF=NADNADH kinase (predicted)
1772993_at	0.0532417	-0.060311	0.356959	0.0230773	S. pombe SPCC24B10.11c /DEF=sequence orphan
1775637_at	0.0864696	-0.0639648	0.228361	-0.0563326	S. pombe SPAC6F6.04c /DEF=membrane transporter (predicted)
1779339_at	-0.171956	-0.0156342	-0.434733	0.842281	S. pombe SPAC57A7.05 /DEF=hypothetical protein
1778397_at	-0.30894	-0.243787	0.188416	0.251056	S. pombe SPBC1A4.06c /DEF=involved in mitochondrial matrix protein import (ISS)
1778547_at	-0.14411	-0.10446	0.202097	0.143882	S. pombe SPBC30D10.07c /DEF=biotin-protein ligase activity (predicted)
1778353_at	0.0939061	-0.0795886	0.108066	-0.425245	S. pombe SPAC7D4.06c /DEF=mannosyltransferase (predicted)
1774364_at	0.19005	-0.23759	0.315158	-0.166287	S. pombe SPBC887.14c /GEN=pfh1 /DEF=DNA helicase (5-3) (PMID 12058079)
1772021_at	-0.000157038	0.00776323	-0.0176401	0.0239455	S. pombe SPAC922.04 /DEF=hypothetical protein
1771465_at	0.0148137	-0.0124674	0.00907326	-0.0316407	S. pombe SPCC622.18 /GEN=rpl6 /DEF=60S ribosomal protein L6
1774882_at	-0.500841	0.813937	-0.609824	1.51784	S. pombe SPAC1F8.04c /DEF=chlorohydrolasedeaminase
1777565_at	0.392326	0.0357367	-0.0446533	-0.207088	S. pombe SPBC13G1.15c /DEF=dubious
1775947_at	0.0283213	-0.361332	0.119027	-0.0174128	S. pombe SPAC977.10 /GEN=sod2 /DEF=CPA1 sodium ionproton antiporter (PMID 8643524)
1777380_at	0.014315	0.0212946	0.149428	-0.0701199	S. pombe SPBC1703.14c /GEN=top1 /DEF=DNA topoisomerase activity
1771965_at	-0.056227	0.0168889	-0.0732962	0.0748358	S. pombe SPAC4G9.09c /GEN=arg11 /DEF=N-acetyl-gamma-glutamyl-phosphate reductase (PMID 1313366)
1779338_at	0.268896	-0.213384	0.505712	-0.159205	S. pombe SPBC354.04 /DEF=dubious
1773682_at	0.269297	0.0780342	-0.448386	-0.0109307	S. pombe SPCC63.13 /DEF=DNAJ domain protein
1772593_at	0.0422084	0.0513035	-0.153471	0.0220181	S. pombe SPAC11E3.12 /DEF=NADH ubiquinone dehydrogenase subunit E (predicted)
1769747_at	-0.0672709	0.37502	-0.21487	0.086976	S. pombe SPBC19C2.10 /DEF=src (SH3) homology domain
1778858_at	-0.0560363	0.132236	-0.143874	0.056289	S. pombe SPAC26H5.05 /DEF=involved in transcriptional regulation (predicted)
1778725_at	-0.00206884	-0.0383291	0.081322	-0.0119076	S. pombe SPBC1539.01c /DEF=hypothetical protein
1778837_at	-0.147217	-0.094292	0.256956	0.0904233	S. pombe SPCC126.12 /DEF=DUF34
1777974_at	-0.231494	0.0996612	0.0285177	0.312237	S. pombe SPCC1494.01 /DEF=IronAscorbate oxidoreductase family
1773661_at	0.0270774	-0.0261815	0.0431239	-0.0167376	S. pombe SPCC613.06 /GEN=rpl902 /DEF=60S ribosomal protein L9
1777262_at	-0.0284459	-0.157956	0.146709	0.0291869	S. pombe SPCC736.03c /DEF=phenylalanyl-tRNA synthetase
1777273_at	-0.139358	0.0519066	-0.199112	0.160099	S. pombe SPAP27G11.02 /DEF=TPR repeat protein
1773220_at	-0.483096	0.318981	-0.829818	0.154745	S. pombe SPAC6G10.03c /DEF=abhydrolase family
1772169_at	-0.146099	0.0881475	-0.190151	-0.0144437	S. pombe SPBP19A11.06 /GEN=lid2 /DEF=transcription factor
1775072_at	0.064387	0.0228513	0.0266304	-0.242273	S. pombe SPCC16C4.02c /DEF=sequence orphan
1776055_at	0.142544	-0.0917044	0.37827	-0.0399005	S. pombe SPCC1235.07 /DEF=sequence orphan
1769700_at	-0.49337	0.286019	-0.605915	0.345413	S. pombe SPBP4H10.12 /DEF=conserved protein
1774686_at	0.0367905	0.00318368	0.236289	-0.0904744	S. pombe SPBC405.06 /DEF=DNAJ domain protein
1777735_at	-0.167689	0.0195862	0.0033706	0.376816	S. pombe SPBP16F5.08c /DEF=flavin dependent monooxygenase (predicted)
1770272_at	0.025602	0.110399	0.0116882	-0.188421	S. pombe SPBC1347.09 /DEF=methyltransferase (predicted)
1775173_at	0.131179	-0.172638	0.0862449	-0.108888	S. pombe SPAC7D4.15c /DEF=oligosaccharyltransferase subunit (predicted)
1779117_at	0.0109574	0.118122	-0.211058	0.00624657	S. pombe SPAC23G3.08c /GEN=ubp7 /DEF=ubiquitin C-terminal hydrolase activity
1769687_at	0.105767	0.035106	-0.0664142	-0.0811605	S. pombe SPBC28F2.12 /GEN=rpb1 /DEF=DNA-directed RNA polymerase (II subunit) (large subunit) (PMID 2011520)
1773773_at	-0.110826	0.00970141	0.0378059	0.243145	S. pombe SPAC9.08c /DEF=steroid reductase (predicted)
1771878_at	-0.000415802	0.0248795	0.00561142	-0.0561504	S. pombe SPAC1687.18c /DEF=sequence orphan
1776645_at	0.0548538	-0.117512	0.230956	-0.015529	S. pombe SPAC24C9.03 /DEF=diphosphomevalonate decarboxylase activity (predicted)
1778736_at	0.146677	-0.193536	0.288118	-0.108144	S. pombe SPBC32F12.06 /GEN=pch1 /DEF=cyclin
1770596_at	-0.0459925	-0.00412114	0.0473645	0.0485926	S. pombe SPCC1620.01c /GEN=lsm2 /DEF=U6 snRNA-associated protein core protein
1770654_at	0.167281	0.321149	-0.671086	-0.0361789	S. pombe SPBC2F12.15c /DEF=zinc finger protein
1776000_at	0.00437927	0.0138496	-0.0118418	-0.115511	S. pombe SPBC1773.07c /GEN=sbp1 /DEF=GTP-binding (PMID 9504913)
1773072_at	-0.0608342	0.0396503	-0.070082	0.0339473	S. pombe SPAPB1E7.02c /GEN=mcl1 /DEF=WD repeat protein
1771243_at	-0.277031	-0.0583903	0.0598799	0.0843808	S. pombe SPAC17H9.17c /GEN=mdm10 /DEF=Mdm10pMdm12pMmm1p complex
1776189_at	0.620632	-0.413046	-0.048048	-0.0171563	S. pombe SPAC1565.04c /GEN=ste4 /DEF=involved in conjugation
1774647_at	-0.0128775	-0.0370967	0.291656	-0.108864	S. pombe SPAC12G12.06c /DEF=RNA 3-terminal phosphate cyclase (predicted)
1772354_at	0.290941	-1.19526	0.599215	-0.596381	S. pombe SPAC644.05c /DEF=deoxyuridine 5-triphosphate nucleotidohydrolase (predicted)
1777261_s_at	-0.409962	0.455399	-0.586709	0.214901	S. pombe SPAC750.07c /DEF=66294 domain
1776031_at	0.00738049	0.147429	-0.180557	-0.0253703	S. pombe SPAC1565.08 /GEN=cdc48 /DEF=AAA family ATPase
1779396_at	-0.0379489	0.0962985	-0.114844	0.0432536	S. pombe SPBC1861.07 /DEF=SKP1 family
1775287_at	-0.0901632	-0.03877	0.0869617	-0.00736968	S. pombe SPAC664.07c /GEN=rad9 /DEF=involved in DNA repair
1776212_at	-0.0192601	-0.30582	0.267578	-0.0295652	S. pombe SPAC19B12.09 /GEN=srp14 /DEF=protein signal sequence binding activity
1778382_at	0.00883261	-0.0698264	0.0793673	-0.00887458	S. pombe SPBC25H2.02 /GEN=ths1 /DEF=threonine-tRNA ligase (predicted)
1779237_at	-0.0947952	-0.0366421	0.121702	0.105986	S. pombe SPBC1604.17c /DEF=sequence orphan
1778471_at	-0.112329	-0.021795	0.156244	-0.0570984	S. pombe SPBC16H5.03c /GEN=uba2 /DEF=ubiquitin activating enzyme
1776606_at	0.0737476	0.0464865	-0.167175	0.0786715	S. pombe SPAC227.08c /GEN=yth1 /DEF=zinc finger protein
1773762_at	0.0123088	-0.0691249	0.250188	0.024923	S. pombe SPBC36.12c /GEN=git7 /DEF=involved in cAMP-mediated signaling
1772083_at	-0.0331122	-0.0231825	-0.134984	0.120716	S. pombe SPAPJ696.01c /GEN=vps17 /DEF=retromer complex (predicted)
1772325_at	-0.108287	0.0722952	-0.145238	0.0557591	S. pombe SPCC1840.06 /GEN=atp5 /DEF=F0-ATPase delta subunit
1775653_at	-0.243213	0.352995	-0.745947	0.0384982	S. pombe SPAC16E8.16 /DEF=transcription initiation factor activity
1779847_at	0.127201	-0.0776272	0.364764	-0.00680033	S. pombe SPAC1786.04 /DEF=hypothetical protein
1778066_at	0.0383387	0.300764	-0.216363	0.0176322	S. pombe SPBC3E7.09 /DEF=conserved eukaryotic protein
1775081_at	-0.175544	0.246122	-0.292808	0.0924762	S. pombe SPAC19A8.01c /GEN=sec73 /DEF=Sec7 domain
1773549_at	-0.194345	0.205269	-0.380896	0.208611	S. pombe SPBC1289.14 /DEF=adducin N-terminal domain protein
1778719_at	-0.025329	0.0491041	0.0278552	-0.0130529	S. pombe SPBC6B1.07 /GEN=prp1 /DEF=TPR repeat protein
1776442_at	0.00761382	0.142616	-0.229342	-0.162465	S. pombe SPAC24H6.05 /GEN=cdc25 /DEF=serinethreonine protein phosphatase
1775304_at	0.148272	-0.147982	0.337504	-0.0511761	S. pombe SPAC17G8.08c /DEF=conserved protein (broad species distribution)
1769563_at	0.0839456	-0.13288	0.249724	-0.0491152	S. pombe SPBC2G2.12 /DEF=histidine-tRNA ligase (predicted)
1771374_at	-0.00652059	-0.0226262	0.114325	-0.0507787	S. pombe SPBC582.05c /GEN=brc1 /DEF=BRCT domain
1775301_at	-0.050889	-0.010177	0.248439	-0.106364	S. pombe SPBP4H10.20 /GEN=nhm1 /DEF=conserved eukaryotic protein
1773533_at	0.287065	-0.357816	0.165598	-0.524955	S. pombe SPBC1778.04 /GEN=spo6 /DEF=Spo4p regulatory subunit
1769984_at	0.00777721	-0.0229632	0.00551796	0.00672404	S. pombe SPBC18E5.04 /GEN=rpl1001 /DEF=60S ribosomal protein L10
1775248_s_at	0.0155344	-0.00551573	-0.0131442	0.00422382	S. pombe SPBC18E5.04 /GEN=rpl1001 /DEF=60S ribosomal protein L10
1773717_at	-0.159121	0.136767	-0.128861	0.454188	S. pombe SPAC1805.16c /DEF=purine nucleoside phosphorylase (predicted)
1774620_at	-0.0225312	-0.0354204	0.0108935	0.0302003	S. pombe SPAC12B10.02c /DEF=sequence orphan
1775300_at	-0.944713	0.472365	-1.85247	0.0792093	S. pombe SPBC725.03 /DEF=hypothetical protein
1772602_at	-0.24321	0.14345	-0.594115	0.440436	S. pombe SPAC25G10.01 /DEF=RNA-binding protein
1769326_at	0.134981	-0.53266	0.086997	-0.327768	S. pombe SPBC1105.05 /GEN=exg1 /DEF=glucan 1,3-beta-glucosidase III precursor
1772135_at	1.44297	-0.0683549	0.281603	-0.726675	S. pombe SPBC4F6.09 /GEN=str1 /DEF=membrane transporter
1777599_at	0.0589774	-0.0246131	0.03396	0.00810846	S. pombe SPBC21H7.02 /GEN=taf10 /DEF=transcription initiation factor activity
1776497_at	-0.0543019	0.0438948	-0.0254265	0.0312293	S. pombe SPBC1826.01c /DEF=chromatin remodeling complex (predicted)
1779672_at	0.0698166	-0.206826	0.12931	-0.633238	S. pombe SPCC23B6.05c /GEN=ssb3 /DEF=DNA replication factor A complex (subunit 3)
1775836_at	0.0357993	-0.0173092	-0.0262241	-0.0498511	S. pombe SPBC18E5.02c /DEF=serine palmitoyltransferase (subunit) (predicted)
1769618_at	0.0839828	0.0407985	0.0774088	-0.0272369	S. pombe SPAC323.08 /DEF=involved in tRNA processing (ISS)
1774406_at	-0.0417302	-0.0523027	-0.0949383	0.0760339	S. pombe SPAC1B3.11c /GEN=ypt4 /DEF=GTPase
1771303_at	0.0911687	-0.00365575	0.0813802	-0.0823901	S. pombe SPAC823.12 /DEF=zinc finger protein
1776230_at	-0.0865075	-0.231288	0.133958	0.123046	S. pombe SPBC19F5.04 /DEF=aspartate kinase (predicted)
1774615_at	0.14441	0.0142972	0.163713	-0.758192	S. pombe SPBC1652.02 /GEN=aap1 /DEF=APC amino acid transporter
1775001_at	0.0203603	-0.214594	0.301583	-0.0275691	S. pombe SPAC5H10.09c /DEF=3-methyl-2-oxobutanoate hydroxymethyltransferase (predicted)
1772717_at	0.0767072	-0.00804774	-0.331366	0.212009	S. pombe SPAC6G9.12 /DEF=BRCT domain
1769924_at	-0.0757694	0.0937834	-0.156903	-0.00118605	S. pombe SPAC23H3.03c /DEF=nitrogen permease regulator family
1773467_at	0.0814355	-0.274326	0.175215	-0.062575	S. pombe SPAC4H3.01 /DEF=DNAJ domain protein
1776965_at	0.228093	-0.0379321	0.135605	-0.0360371	S. pombe SPAC13G6.14 /GEN=aps1 /DEF=diphosphoinositol-polyphosphate diphosphatase activity
1779766_at	0.152019	-0.0528536	0.331438	-0.253913	S. pombe SPCC550.15c /DEF=zinc finger protein
1770712_at	0.0175769	-0.25506	0.53542	-0.0994498	S. pombe SPAP8A3.11c /DEF=GTP1OBG family
1773761_at	-0.0626402	-0.0213912	0.00938733	0.196317	S. pombe SPCC4B3.04c /DEF=cyclic nucleic acid binding family protein
1773927_at	0.132031	0.122443	-0.116748	-0.131114	S. pombe SPAC9G1.02 /GEN=wis4 /DEF=serinethreonine protein kinase
1776518_at	-0.199379	-0.0744801	0.0649462	0.299129	S. pombe SPAC4G9.12 /DEF=glucokinase (predicted)
1773596_at	-0.0287393	0.191944	-0.154083	0.0999359	S. pombe SPAC17G6.05c /DEF=endosome associated protein (predicted)
1779162_at	-0.151485	-0.00568867	0.143452	-0.0310955	S. pombe SPAC3C7.09 /DEF=histone lysine methyltransferase (predicted)
1775266_at	0.230316	0.030605	0.183725	-0.211199	S. pombe SPCC162.01c /DEF=RNA-binding protein (predicted)
1770528_at	-0.0388826	-0.126497	0.260495	0.0411536	S. pombe SPBC776.14 /GEN=plh1 /DEF=phospholipid-diacylglycerol acyltransferase (PMID 12963726)
1774899_at	-0.192715	-0.0794833	0.110734	0.278685	S. pombe SPCC1183.03c /DEF=frataxin homolog
1771895_at	-0.205341	0.317338	-0.651667	0.158522	S. pombe SPBC23G7.06c /DEF=conserved eukaryotic protein
1769386_at	-0.161818	0.278667	-0.289362	0.105163	S. pombe SPAC343.06c /DEF=scramblase
1775755_s_at	-0.112844	0.0516911	-0.172747	0.424239	S. pombe SPCC970.11c /GEN=wtf9 /DEF=wtf element
1775602_at	0.0293684	-0.0580222	0.134912	-0.0256376	S. pombe SPBC3E7.10 /DEF=methionine aminopeptidase (predicted)
1776271_at	0.0340846	0.0300859	-0.00236352	-0.0689427	S. pombe SPAC824.09c /DEF=GTPase activating protein (predicted)
1771936_at	-0.0179885	0.00282733	0.0522213	-0.0694691	S. pombe SPBC337.05c /GEN=cct8 /DEF=chaperonin-containing T-complex
1779513_at	-0.0362148	0.0189597	0.073486	-0.303734	S. pombe SPCC622.19 /GEN=jmj4 /DEF=jmjC domain
1780216_at	0.16625	-0.0672499	0.287482	-0.236422	S. pombe SPBC354.03 /GEN=swd3 /DEF=SET1 complex (TAP) (PMID 12488447)
1772961_at	0.203475	-0.135581	0.25951	-0.371704	S. pombe SPBC14C8.02 /GEN=tim44 /DEF=TIM23 translocase complex
1770789_at	-0.0336634	0.107228	-0.274852	0.0230649	S. pombe SPAC19A8.13 /DEF=U1 snRNP associated (predicted)
1771332_at	0.0509806	0.347857	-0.667445	-0.074055	S. pombe SPCC569.03 /DEF=B13958 domain
1770086_at	-0.754984	0.460426	-1.10691	0.446288	S. pombe SPAC4H3.04c /DEF=conserved eukaryotic protein
1778349_at	0.0592165	-0.0155719	0.158669	-0.309854	S. pombe SPAC1527.03 /DEF=RNA-binding protein
1773652_at	0.347773	0.039045	-0.0808318	-0.183314	S. pombe SPAC2F7.03c /GEN=pom1 /DEF=serinethreonine protein kinase
1771248_at	-0.0780992	0.137034	-0.172623	0.111887	S. pombe SPBC725.13c /DEF=GINS complex
1772178_at	0.053936	-0.291965	0.121435	0.0164604	S. pombe SPAC5H10.05c /DEF=NADHdh_2 domain protein
1772691_at	-0.0971336	-0.0104256	0.0129147	0.0671698	S. pombe SPBC15C4.03 /DEF=RAB geranylgeranyl-transferase escort protein (predicted)
1779383_at	-0.0426534	0.144019	-0.179116	-0.0012385	S. pombe SPBC119.01 /GEN=rpn3 /DEF=19S proteasome regulatory subunit
1773854_at	-0.0540905	0.0548741	0.0694243	-0.161328	S. pombe SPBC13E7.05 /DEF=mannosyltransferase (predicted)
1770757_at	0.269334	-0.147045	0.615745	-0.453302	S. pombe SPBC19F5.05c /GEN=ppp1 /DEF=localization nucleolus (predicted)
1776443_at	-0.025314	0.0259399	-0.0984526	0.0159448	S. pombe SPAP8A3.08 /GEN=cdc4 /DEF=EF hand
1777159_s_at	0.208541	-0.917442	1.09569	0.056252	S. pombe SPBPB2B2.07c /DEF=DUF999
1771377_at	-0.546992	0.601054	-1.11052	0.204438	S. pombe SPBP26C9.02c /GEN=car1 /DEF=arginase (PMID 7985419)
1777390_at	-0.0364294	-0.0228338	0.0469033	-0.0934242	S. pombe SPBC3E7.11c /DEF=DNAJ domain protein
1773463_at	0.0230182	0.067887	0.0738395	-0.213717	S. pombe SPBC947.14c /DEF=dubious
1774487_at	0.0831137	0.283661	-0.262298	-0.118724	S. pombe SPBPB7E8.02 /DEF=conserved protein (fungal bacterial protazoan)
1780140_at	-0.139088	0.0943877	-0.246495	-0.0193739	S. pombe SPCC320.13c /GEN=ark1 /DEF=serinethreonine protein kinase
1777201_at	0.109715	0.102177	-0.0248728	-0.303034	S. pombe SPBC21C3.02c /DEF=sequence orphan
1779617_at	0.0909049	-0.14342	0.33368	-0.0350253	S. pombe SPBC4B4.07c /DEF=small nuclear ribonucleoprotein (snRNP) (predicted)
1774492_at	-0.0405391	0.141448	-0.278487	0.0238021	S. pombe SPAC31A2.04c /DEF=20S proteasome component (beta 4)
1771688_at	0.115461	-0.160666	0.265917	-0.152897	S. pombe SPBC3B9.19 /DEF=chaperone activity (predicted)
1779151_at	0.0213766	0.00927989	-0.00474834	-0.0114063	S. pombe SPAC29A4.18 /GEN=prw1 /DEF=WD repeat protein
1772988_at	0.0465151	-0.227505	0.236933	-0.0767485	S. pombe SPCC4G3.02 /GEN=aph1 /DEF=bis(5-nucleosidyl)-tetraphosphatase (PMID 8554540)
1770264_at	0.0453065	-0.0738185	0.158535	-0.0157331	S. pombe SPBC17G9.03c /DEF=lysine-tRNA ligase
1774659_at	-0.0333207	0.0912018	0.0173267	-0.0879021	S. pombe SPBC31F10.13c /GEN=hip1 /DEF=hira protein
1773380_s_at	0.00935109	-0.00546487	-0.00449022	-0.0112696	S. pombe SPAC17A5.03 /GEN=rpl301 /DEF=60S ribosomal protein L3 (PMID 8181745)
1779345_at	0.0446103	-0.0642017	0.027552	-0.0267607	S. pombe SPAC32A11.04c /GEN=tif212 /DEF=translation initiation factor
1776677_at	0.0858246	0.0317033	-0.041295	-0.0225143	S. pombe SPBC16E9.01c /DEF=sequence orphan
1779205_at	0.0105921	0.240708	-0.175666	-0.0254428	S. pombe SPAC26F1.09 /GEN=gyp51 /DEF=TBC domain protein
1776468_at	0.124892	-0.150829	-0.079347	0.120963	S. pombe SPCC737.09c /GEN=hmt1 /DEF=ABC transporter family
1775585_at	-0.140999	0.0907456	0.0251932	-0.00185744	S. pombe SPAC4G8.09 /DEF=leucine-tRNA ligase (predicted)
1773624_at	-0.0643164	-0.0625604	0.0693356	0.0244258	S. pombe SPCC970.02 /DEF=glycosyl hydrolase family 76
1775306_at	-0.22428	0.225189	-0.362936	0.861188	S. pombe SPAC6B12.03c /DEF=sequence orphan
1777466_at	0.0268838	0.0841846	-0.164607	-0.181129	S. pombe SPAC31G5.02 /DEF=conserved fungal protein
1779935_at	0.0643142	0.0458574	-0.0112187	-0.170645	S. pombe SPCC1322.02 /DEF=sequence orphan
1774381_at	-0.0223185	0.254651	-0.113581	-0.0314023	S. pombe SPBC947.11c /DEF=replication factor C complex (predicted) (ISS)
1777287_at	0.0776373	-0.0560153	-0.463288	0.0321344	S. pombe SPBC3H7.13 /DEF=FHA domain (phosphopeptide binding)
1773550_at	0.0516742	-0.108553	0.0555785	-0.169691	S. pombe SPBC16A3.15c /GEN=nda2 /DEF=tubulin (alpha 1)
1771238_at	-0.0179469	-0.248494	0.157592	-0.0647078	S. pombe SPBC16G5.04 /GEN=mrpl23 /DEF=mitochondrial ribosomal protein subunit YmL23
1778880_at	-0.12146	0.0476681	0.144318	-0.0900907	S. pombe SPCC16A11.13 /GEN=luc7 /DEF=U1 snRNA-associated protein
1776318_at	-0.0289087	0.0615552	-0.00381533	-0.0305239	S. pombe SPCC622.07 /DEF=dubious
1778701_at	-0.0241384	0.0679757	-0.0900135	0.0267102	S. pombe SPCC338.10c /GEN=cox5 /DEF=cytochrome c oxidase (subunit V) (predicted)
1776870_at	-0.0164286	0.169682	-0.488694	0.0263913	S. pombe SPAPB8E5.04c /DEF=phosphatidylglycerolphosphatidylinositol transfer protein (predicted)
1778176_at	0.138539	-0.0535192	0.245644	-0.23219	S. pombe SPAC4D7.04c /DEF=cis-prenyltransferase (predicted)
1773146_at	0.0888252	-0.00561746	0.404706	-0.226542	S. pombe SPBP8B7.09c /DEF=exportin t
1779614_at	-0.042093	0.0327965	0.0118519	0.000722567	S. pombe SPBC17D11.06 /GEN=spp2 /DEF=DNA primase (large subunit) (PMID 11027257)
1778373_at	-0.129547	0.017004	-0.0329498	0.112528	S. pombe SPAC16A10.06c /DEF=zinc finger protein
1772072_at	0.0303777	0.225876	-0.254896	-0.101034	S. pombe SPAC3C7.06c /GEN=pit1 /DEF=serinethreonine protein kinase
1776100_at	0.187111	-0.0170046	0.00157928	-0.274348	S. pombe SPBC11C11.08 /GEN=srp1 /DEF=SR family
1774939_at	-0.0208702	0.106282	-0.0760689	0.0226634	S. pombe SPAC222.05c /DEF=erathdf family GTP-binding protein
1772182_at	0.114536	-0.0258633	0.0248324	-0.0898196	S. pombe SPAPB1E7.09 /DEF=glycosyl transferase family 39
1778610_s_at	-0.0354411	0.0187384	-0.0740159	0.023434	S. pombe SPBC354.12 /GEN=gpd3 /DEF=glyceraldehyde 3-phosphate dehydrogenase
1777680_at	0.0374066	0.0711892	0.00379276	-0.117079	S. pombe SPBC16A3.05c /GEN=rae1 /DEF=WD repeat protein
1777283_at	0.0512978	-0.240414	0.385859	-0.0472269	S. pombe SPBC3E7.07c /DEF=hypothetical protein
1778776_at	0.0730457	-0.0315701	0.0699587	-0.0768843	S. pombe SPAC17C9.09c /GEN=tim13 /DEF=TIM22 inner membrane protein import complex
1776475_at	-0.156133	0.0723728	-0.315246	0.0981159	S. pombe SPBC9B6.06 /GEN=mrpl10 /DEF=mitochondrial ribosomal protein subunit YmL10Yml18
1770522_at	-0.0478236	0.0960236	0.178698	-0.327842	S. pombe SPBC106.17c /DEF=homoserine O-acetyltransferase (predicted)
1777635_at	-0.0303609	0.074817	-0.158784	0.0386683	S. pombe SPAC2C4.14c /DEF=serinethreonine protein kinase (predicted)
1775361_at	-0.30654	0.163749	-0.653786	0.123789	S. pombe SPAC17C9.11c /DEF=zinc finger protein
1770953_at	0.101329	-0.0915476	0.0304028	-0.131248	S. pombe SPAC3A11.08 /GEN=pcu4 /DEF=cullin family
1774637_at	-0.192432	0.00719897	-0.0422675	0.269896	S. pombe SPBC1539.07c /DEF=glutathione dependent formaldehyde dehydrogenase (predicted)
1776194_at	-0.0240173	-0.115555	0.171535	0.021184	S. pombe SPBC18H10.17c /DEF=sequence orphan
1773408_at	-0.00224622	0.273029	-0.10612	0.0566594	S. pombe SPCC63.03 /DEF=DNAJ domain protein
1771532_at	-0.00674375	-0.00206153	0.0221968	-0.149367	S. pombe SPBC947.03c /DEF=dubious
1772866_at	0.241136	-0.364747	0.179046	-0.193137	S. pombe SPCC338.17c /GEN=rad21 /DEF=mitotic cohesin complex (subunit) (PMID 11069892)
1774786_at	-0.186131	-0.0248823	-0.266178	0.016065	S. pombe SPAC631.02 /DEF=bromodomain protein
1777516_at	-0.295972	0.15498	-0.463781	0.104777	S. pombe SPBC405.05 /DEF=hypothetical protein
1771427_at	-0.0722233	0.112117	0.0140816	0.00139173	S. pombe SPAC17A5.16 /DEF=conserved eukaryotic protein
1773504_at	-0.0146542	0.0748882	0.166303	-0.17266	S. pombe SPBC8D2.09c /DEF=U2 b-like spliceosomal protein
1779486_at	-0.164619	0.0987295	-0.121556	0.205369	S. pombe SPAC1D4.12 /GEN=rad15 /DEF=transcription factor TFIIH complex
1777361_at	-0.160278	0.330724	-0.416628	0.141381	S. pombe SPAC23C11.17 /DEF=conserved eukaryotic protein
1773277_at	-0.113838	-0.186152	0.170537	0.0570742	S. pombe SPAC664.12c /DEF=conserved eukaryotic protein
1771637_at	0.0495987	0.108498	-0.135643	-0.0503149	S. pombe SPBC16G5.11c /GEN=bag101 /DEF=BAG-family
1778432_at	-0.0418746	-0.0331748	-0.00677967	0.144594	S. pombe SPAC144.05 /DEF=zinc finger protein
1774008_at	-0.0710332	0.0225808	-0.025636	0.027324	S. pombe SPBC16G5.08 /GEN=trp4 /DEF=phosphoribosylanthranilate transferase
1770574_at	0.0627696	-0.191061	0.0682049	-0.00755596	S. pombe SPCC285.09c /GEN=cgs2 /DEF=3,5-cyclic-nucleotide phosphodiesterase (PMID 8392846)
1776642_at	0.0658852	-0.00965404	0.0937392	-0.193555	S. pombe SPAC2F3.02 /DEF=TPR repeat protein
1769444_at	-0.141671	0.101331	-0.275504	0.0924355	S. pombe SPBC660.17c /DEF=sequence orphan
1778464_at	0.0821314	0.27062	-0.210105	-0.124157	S. pombe SPAC22E12.19 /DEF=Myb family
1780000_at	0.0574379	0.0902624	-0.0125987	-0.0874093	S. pombe SPAC2G11.04 /DEF=G-patch domain
1777040_at	-0.00453472	0.106804	-0.0956624	-0.0117909	S. pombe SPAC3A12.12 /GEN=atp11 /DEF=F1 ATPase chaperone (PMID 12206899)
1772108_at	0.0814412	-0.0831461	0.178136	-0.112246	S. pombe SPAC29A4.08c /GEN=prp19 /DEF=ubiquitin-protein ligase (E4) (predicted) (PMID 12627222)
1778945_at	0.0154479	0.0103038	0.0844129	-0.276791	S. pombe SPBC28F2.02 /GEN=mep33 /DEF=mRNA export protein
1777708_at	-0.207366	0.0113544	0.110419	0.0588055	S. pombe SPBC1A4.11c /DEF=hypothetical protein
1779556_at	-0.206221	0.0299091	-0.0274054	0.0184298	S. pombe SPCC18B5.08c /DEF=isoleucine-tRNA ligase (predicted)
1775321_at	-2.28818	-2.25707	2.03882	2.23663	S. pombe SPAC22E12.11c /DEF=transcription factor
1772504_at	0.0754639	-0.129868	-0.00148265	0.04857	S. pombe SPAP14E8.03 /GEN=bos1 /DEF=SNARE
1779303_at	0.0469007	0.180313	-0.252753	-0.0889746	S. pombe SPBP35G2.14 /DEF=RNA-binding protein
1778750_at	-0.30609	0.0465053	-0.00495561	0.18599	S. pombe SPAPB24D3.02c /DEF=amino acid permease family
1779326_at	0.107514	-0.292687	0.368114	-0.118504	S. pombe SPAC3A12.09c /DEF=urease accessory protein (predicted)
1771205_at	-0.00458527	-0.0227639	-0.0862726	0.0815182	S. pombe SPBC12C2.10c /GEN=pst1 /DEF=SIN3 family co-repressor
1774114_at	-0.0106583	0.137231	-0.0261958	-0.165533	S. pombe SPAC890.03 /DEF=serinethreonine protein kinase (predicted)
1776815_at	-0.00174141	0.230896	-0.0844364	0.0739667	S. pombe SPCC1827.03c /DEF=long-chain fatty acid transporter (predicted)
1770328_at	0.129511	-0.0639521	0.213205	-0.0814699	S. pombe SPBC646.09c /GEN=yin6 /DEF=translation initiation factor
1776140_at	-0.0100155	0.0378695	0.0684923	-0.153237	S. pombe SPBC543.07 /GEN=pek1 /DEF=serinethreonine protein kinase
1776631_at	0.0836236	-0.0631717	0.0831769	-0.0324669	S. pombe SPCC1281.02c /GEN=spf30 /DEF=spliceosome associated protein (implicated)
1769757_at	-0.350454	0.503315	-0.983092	0.218042	S. pombe SPAC1687.22c /DEF=RNA-binding protein
1771543_at	0.115393	-0.131158	0.539558	-0.105295	S. pombe SPAC30.02c /DEF=polynucleotide kinase (predicted)
1774951_at	0.230256	0.298995	-0.154617	-0.311408	S. pombe SPBC106.11c /DEF=phospholipase A2 (predicted)
1770602_at	0.351092	-0.353171	0.442682	-0.420798	S. pombe SPAC2E1P5.03 /DEF=DNAJ domain protein
1776322_at	0.0304899	-0.00131957	0.0423037	-0.27064	S. pombe SPBC3B9.16c /GEN=nup120 /DEF=nucleoporin
1773844_at	0.184815	-0.0972993	0.646933	-0.0431277	S. pombe SPAC8F11.09c /DEF=methyltransferase (predicted)
1770360_at	0.0447702	0.00182184	-0.0125837	-0.130878	S. pombe SPCC550.06c /GEN=hsp10 /DEF=heat shock protein (predicted)
1770600_at	0.00656573	0.0132612	-0.0339044	0.0291271	S. pombe SPBC4F6.18c /GEN=arf1 /DEF=ADP-ribosylation factor (PMID 8212899)
1777734_at	-0.0896276	0.0599651	-0.145227	0.0292486	S. pombe SPAC11D3.15 /DEF=oxoprolinase (predicted)
1775096_at	-0.121635	-0.0522811	0.232558	0.104953	S. pombe SPCC830.10 /DEF=similar to S. cerevisiae YJR069C
1770643_at	0.104698	0.19589	-0.122126	-0.0483783	S. pombe SPCC4B3.14 /GEN=cwf20 /DEF=involved in mRNA splicing (predicted)
1774205_at	0.0627349	0.12206	-0.242354	-0.0581783	S. pombe SPAC19G12.14 /GEN=its3 /DEF=1-phosphatidylinositol-4-phosphate 5-kinase activity (PMID 10950958)
1773770_at	0.181293	-0.232306	0.509324	-0.181281	S. pombe SPBC839.11c /GEN=hut1 /DEF=protein which maintains optimal environment for folding in secretory pathway proteins in the ER (PMID 11284010)
1775196_at	0.0700995	-0.124669	0.0548464	-0.0859569	S. pombe SPBC1773.16c /DEF=transcription factor (predicted)
1774977_at	0.0870851	-0.0410182	0.283155	-0.11896	S. pombe SPAC13G7.03 /DEF=involved in mRNA catabolism, nonsense-mediated
1778276_at	0.0613241	-0.0663341	0.0319576	-0.0785446	S. pombe SPAC18G6.03 /GEN=ypt3 /DEF=GTPase
1777185_at	0.12079	-0.0551049	0.0457859	-0.115774	S. pombe SPCC645.12c /DEF=sequence orphan
1773808_at	-0.207678	-0.100061	0.0546449	0.0131054	S. pombe SPCC645.02 /DEF=hypothetical protein
1777025_at	-0.31404	0.73385	-0.839686	0.158651	S. pombe SPAC3C7.13c /DEF=glucose-6-phosphate 1-dehydrogenase (predicted)
1780021_at	-0.0864938	-0.125545	0.177037	-0.0318095	S. pombe SPAC23D3.02 /GEN=rfc2 /DEF=AAA family ATPase
1770262_at	0.157932	-0.120003	0.366384	-0.34793	S. pombe SPBC3F6.04c /DEF=ribonucleoprotein (RNP) complex (PMID 12068309) (predicted)
1776276_at	0.0735795	-0.026049	0.0493069	-0.126224	S. pombe SPAC6F6.17 /GEN=rif1 /DEF=essential
1778012_at	-0.0621316	-0.00168896	-0.0246735	0.0668694	S. pombe SPAC24H6.04 /GEN=hxk1 /DEF=hexokinase (PMID 8549830)
1772158_at	-0.0839965	-0.0351842	0.0659889	0.406699	S. pombe SPBC1539.03c /GEN=argx /DEF=argininosuccinate lyase (putative)
1771511_at	0.0634899	0.00984955	-0.211337	0.0249742	S. pombe SPCC16C4.09 /GEN=sts5 /DEF=RNB-like protein
1771798_at	-0.0452709	0.173604	-0.26975	-0.0228211	S. pombe SPAC11H11.06 /GEN=arp2 /DEF=ARP23 actin-organizing complex
1771436_at	-0.000329336	0.0108868	0.0749772	-0.0828918	S. pombe SPAC227.09 /DEF=folylpolyglutamate synthase (predicted)
1770524_at	-0.0359062	-0.14341	0.230851	-0.0187588	S. pombe SPBC12D12.07c /DEF=thioredoxin (ISS)
1775275_at	0.00925128	0.124964	-0.0691935	-0.0275389	S. pombe SPCC16C4.11 /GEN=pef1 /DEF=Pho85PhoA-like cyclin-dependent kinase
1778855_at	-0.0302362	0.118546	-0.187408	0.015247	S. pombe SPAC6G10.04c /DEF=20S proteasome component (alpha 6)
1775545_at	0.0169061	-0.101577	0.199141	-0.154098	S. pombe SPBC216.06c /GEN=swi1 /DEF=involved in mating-type switching (PMID 6587363)
1772074_at	-0.081303	0.0414718	-0.0558036	0.103839	S. pombe SPBC30D10.05c /DEF=short chain dehydrogenase (predicted)
1779667_at	-0.0231781	0.07656	0.0426334	-0.0585067	S. pombe SPBC21C3.17c /DEF=conserved fungal protein
1777540_at	-0.131039	0.131111	-0.0880432	0.223593	S. pombe SPBC16G5.07c /DEF=prohibitin (predicted)
1774261_at	-0.0544904	0.0413043	-0.287275	0.105748	S. pombe SPBC21C3.20c /GEN=git1 /DEF=C2 domain
1778529_at	-0.0194956	0.200213	-0.095432	0.02928	S. pombe SPAC1782.06c /DEF=prohibitin (predicted)
1779048_at	-0.000955582	0.202106	-0.0826289	-0.203166	S. pombe SPAC186.01 /DEF=glycoprotein (predicted)
1775475_at	-0.00838216	-0.0126406	0.0536105	0.00590515	S. pombe SPBC36.05c /GEN=clr6 /DEF=transcriptional regulator
1777377_at	0.0188287	-0.00692526	0.0170018	-0.0450052	S. pombe SPCC417.08 /GEN=tef3 /DEF=translation elongation factor activity (TAS) (PMID 9099890)
1776116_at	0.129431	-0.32427	0.128906	0.026961	S. pombe SPAPB1A10.13 /DEF=sequence orphan
1776549_at	0.0986417	-0.0645587	0.127662	-0.161977	S. pombe SPAC1B3.12c /GEN=rpb10 /DEF=DNA-directed RNA polymerase (I, II, and III subunit)
1772732_at	-0.0664234	-0.0617946	0.10228	0.0372302	S. pombe SPCC970.12 /DEF=sequence orphan
1774030_at	0.432922	-0.477951	1.35265	-0.204551	S. pombe SPCC297.04c /DEF=SET domain
1770689_at	-0.0334342	0.248483	-0.231785	-0.0475547	S. pombe SPAC222.14c /DEF=GTP binding
1772762_s_at	-0.0808366	-0.0426191	0.0782893	0.249951	S. pombe SPCC1682.06 /DEF=sequence orphan
1774311_at	0.00222333	0.0229092	0.0128911	-0.185586	S. pombe SPAC16C9.06c /DEF=involved in mRNA catabolism, nonsense-mediated
1769469_at	0.0604245	-0.159892	0.279993	0.059858	S. pombe SPAC23D3.04c /GEN=gpd2 /DEF=glycerol-3-phosphate dehydrogenase (NAD+)
1770914_at	-0.111569	0.121353	-0.242503	0.169099	S. pombe SPAC10F6.13c /DEF=aspartate aminotransferase (predicted)
1777717_at	0.0271807	-0.0394268	0.046593	-0.0254033	S. pombe SPCC1223.05c /GEN=rpl3702 /DEF=60S ribosomal protein L37
1775985_x_at	0.0240631	-0.0405744	0.0564731	-0.0215708	S. pombe SPCC1223.05c /GEN=rpl3702 /DEF=60S ribosomal protein L37
1779829_at	0.13636	-0.195425	0.478801	0.0318947	S. pombe SPBC14C8.12 /GEN=rpb8 /DEF=DNA-directed RNA polymerase (I, II, and III subunit) (PMID 10335407)
1778600_at	-0.0100791	-0.124985	0.026322	0.0665528	S. pombe SPCC1840.09 /DEF=conserved fungal protein
1773011_at	0.0694733	-0.0658843	0.164109	-0.140427	S. pombe SPAC1D4.04 /GEN=cct2 /DEF=T-complex protein 1 (beta subunit)
1779374_at	0.19798	-0.0975958	0.125259	-0.0515378	S. pombe SPAC19G12.08 /DEF=fatty acid hydroxylase (predicted)
1771769_at	-0.0296609	-0.026591	0.313177	-0.019709	S. pombe SPAC1687.19c /DEF=queuine tRNA-ribosyltransferase
1776880_at	-0.0170034	-0.144874	0.324697	0.00789642	S. pombe SPAC644.10 /DEF=dubious
1777550_at	-0.258815	0.165053	-0.565441	0.115314	S. pombe SPAC15E1.10 /DEF=sequence orphan
1775524_at	0.0783911	-0.00574398	0.161531	-0.114397	S. pombe SPAC3G9.01 /DEF=sequence orphan
1779826_at	0.0557308	-0.0211703	0.100585	-0.0671326	S. pombe SPAC644.15 /GEN=rpp101 /DEF=60S acidic ribosomal protein
1778341_at	0.202359	-0.133969	0.571659	-0.243969	S. pombe SPBP8B7.20c /DEF=methyltransferase (predicted)
1771899_at	-0.0282351	0.220433	-0.0290867	-0.0239334	S. pombe SPAC1002.14 /GEN=itt1 /DEF=zinc finger protein
1771314_at	0.136376	-0.0579901	0.356405	-0.141041	S. pombe SPAC6F6.03c /DEF=GTP binding protein associated
1779607_at	-0.253656	0.253622	-0.95767	-0.0164747	S. pombe SPBC1105.14 /DEF=zinc finger protein
1779092_at	-0.103056	0.139942	-0.334499	0.0850795	S. pombe SPAC926.03 /GEN=rlc1 /DEF=myosin regulatory light chain (type II) (PMID 11056543)
1776834_at	0.0190016	-0.0638523	0.134763	-0.0822684	S. pombe SPBC11G11.06c /GEN=sme1 /DEF=small nuclear ribonucleoprotein (snRNP) (subunit E)
1775127_at	0.0382722	0.335581	0.107981	-0.0504513	S. pombe SPBC530.11c /DEF=transcription factor (predicted)
1773167_at	0.168558	-0.177927	0.143335	-0.573584	S. pombe SPCC1393.13 /DEF=conserved eukaryotic protein
1770470_s_at	-0.018062	-0.654255	0.0311546	0.365774	S. pombe SPAC977.09c /DEF=lysophospholipase (putative)
1774559_at	0.0968443	0.0627855	-0.035682	-0.14234	S. pombe SPBC25B2.04c /DEF=NTP binding (predicted)
1778321_at	0.439077	-0.298713	1.01175	-0.192313	S. pombe SPBPB8B6.05c /DEF=L-asparaginase (predicted)
1778039_s_at	0.441016	-0.35865	1.06393	-0.259291	S. pombe SPBPB8B6.05c /DEF=L-asparaginase (predicted)
1769894_at	0.0938056	-0.168362	0.315772	-0.111375	S. pombe SPAC23A1.07 /DEF=zinc finger protein
1778581_at	-0.0437584	0.0407419	-0.096611	0.182496	S. pombe SPAC24C9.08 /DEF=gly x carboxypeptidase activity (predicted)
1776320_at	-0.145848	0.074948	0.0159016	0.0515855	S. pombe SPAC31A2.05c /GEN=mis4 /DEF=adherin
1775333_at	0.0138524	0.0130895	0.0453437	-0.102689	S. pombe SPCC1672.09 /DEF=triglyceride lipase-cholesterol esterase (predicted)
1770657_at	0.0122916	-0.0306349	0.105967	0.00775528	S. pombe SPCC18B5.10c /DEF=WD repeat protein
1776510_at	-0.0190872	0.143753	-0.0194896	-0.0248607	S. pombe SPAC12B10.03 /DEF=WD repeat protein
1775671_at	-0.0329129	0.071339	-0.0872815	0.058794	S. pombe SPAC1296.02 /GEN=cox4 /DEF=cytochrome c oxidase subunit IV
1770950_at	-0.0397062	0.0185598	-0.0859508	0.0129604	S. pombe SPBC13E7.04 /GEN=atp16 /DEF=F1-ATPase delta subunit predicted
1772180_at	-0.260804	0.0149918	-0.0338872	0.119306	S. pombe SPAC806.04c /DEF=conserved protein (broad species distribution)
1778027_at	0.209906	-0.250773	-0.596689	0.252054	S. pombe SPAC23G3.03 /DEF=peptide monooxygenase (predicted)
1777076_at	0.0302051	0.00419617	-0.0937154	0.00454585	S. pombe SPBC1778.06c /GEN=fim1 /DEF=fimbrin
1770471_at	0.116522	-0.201761	0.13591	-0.0867208	S. pombe SPAC17G6.07c /DEF=SNARE (predicted)
1779938_at	-0.055686	-0.0455958	0.0317376	0.0236085	S. pombe SPCC548.05c /DEF=zinc finger protein
1772867_at	-0.11322	0.194056	-0.484257	0.040199	S. pombe SPCC645.05c /GEN=myo2 /DEF=myosin (type II) (heavy chain)
1779752_at	0.164978	-0.0530828	0.561048	-0.300938	S. pombe SPBC29A3.06 /DEF=WD repeat protein
1769856_at	-0.49346	0.510273	-1.25496	0.604602	S. pombe SPAC20G4.03c /GEN=hri1 /DEF=serinethreonine protein kinase
1775267_at	-0.0340344	-0.208041	0.524488	0.00898616	S. pombe SPBC16H5.15 /DEF=sequence orphan
1773215_at	-0.300785	-0.156361	0.107116	0.106491	S. pombe SPBC1709.04c /GEN=cyp3 /DEF=cyclophilin (PMID 12651004)
1775601_at	-0.0857932	0.082552	-0.452215	0.163213	S. pombe SPAC1D4.03c /DEF=involved in intracellular protein transport (predicted)
1770733_at	0.0793076	0.0159458	-0.0986261	-0.0468162	S. pombe SPAC22F3.06c /DEF=Lon protease homolog
1771437_at	-0.210441	0.223842	-0.243232	0.1197	S. pombe SPAC1002.05c /GEN=jmj2 /DEF=transcription factor (predicted)
1776534_at	0.110843	0.0383368	0.0261567	-0.202314	S. pombe SPAC2F7.02c /DEF=phosphoprotein phosphatase activity
1771168_at	0.148465	-0.0293287	-0.3033	0.0057621	S. pombe SPAC4C5.03 /DEF=conserved fungal protein
1773440_at	-0.0856457	0.25213	-0.293716	0.0502996	S. pombe SPBC30D10.10c /GEN=tor1 /DEF=phosphatidylinositol kinase
1772257_at	0.0265319	-0.138271	0.191663	-0.107144	S. pombe SPBC28F2.06c /GEN=mdm12 /DEF=Mdm10pMdm12pMmm1p complex
1772245_at	-0.449189	0.456189	-1.1556	0.189829	S. pombe SPAC4D7.02c /DEF=glycerophosphoryl diester phosphodiesterase (predicted)
1775016_at	0.163367	-0.143945	0.340755	-0.151292	S. pombe SPAC4D7.08c /GEN=ade4 /DEF=amidophosphoribosyltransferase (PMID 8082193)
1777757_at	0.000990868	-0.0437943	0.0187203	-0.00609907	S. pombe SPBC106.18 /GEN=rpl25a /DEF=60S ribosomal protein L25
1771047_at	0.452026	-0.880756	0.275783	-0.757321	S. pombe SPBC428.18 /GEN=cdt1 /DEF=involved in DNA replication (initiation) (required)
1772430_at	-0.00804456	-0.0638091	0.110712	0.0406723	S. pombe SPAC1687.21 /DEF=phosphoglycerate mutase family (predicted)
1775520_at	0.136276	-0.15839	0.278874	-0.145477	S. pombe SPBC21B10.04c /GEN=nrf1 /DEF=chaperone activity (predicted)
1773462_at	-0.120426	-0.0107743	0.0224619	0.0777671	S. pombe SPAP27G11.03 /DEF=conserved eukaryotic protein
1773116_at	0.0441043	-0.0623525	0.345268	-0.0481005	S. pombe SPBC713.03 /DEF=D-lactate dehydrogenase (cytochrome) (predicted)
1778244_at	0.0441599	-0.0341434	0.0851339	-0.0422312	S. pombe SPAC6G9.09c /GEN=rpl24 /DEF=60S ribosomal protein L24
1779574_at	0.0792488	-0.316752	-0.735278	0.0843687	S. pombe SPBC32C12.02 /GEN=ste11 /DEF=transcription factor
1773184_at	0.447382	-0.789603	0.279315	-0.576412	S. pombe SPAC17H9.19c /GEN=cdt2 /DEF=WD repeat protein
1776547_at	-0.0300293	-0.0929708	0.136822	-0.130417	S. pombe SPBC13A2.01c /DEF=nuclear cap-binding complex (small subunit)
1770369_at	0.0272201	-0.0039355	0.0833886	-0.0372864	S. pombe SPAC222.04c /DEF=hypothetical protein
1778854_at	0.0254943	0.0159798	0.0320082	-0.271569	S. pombe SPBC25B2.07c /DEF=sequence orphan
1779149_at	0.122502	0.0041523	0.134768	-0.384918	S. pombe SPCC594.02c /DEF=hypothetical protein
1776938_at	-0.0843722	-0.282022	0.215155	0.0655664	S. pombe SPCC1884.02 /GEN=nic1 /DEF=NiCoT heavy metal ion transporter
1771613_at	0.0704997	-0.0486269	0.366004	-0.042153	S. pombe SPCC162.02c /DEF=AMP-binding dehydrogenase (predicted)
1774598_at	0.0308946	0.093132	-0.295654	-0.0493946	S. pombe SPBC146.04 /DEF=Erv1Alr family
1772014_at	-0.107539	0.264132	-0.251078	0.141847	S. pombe SPBC27B12.01c /GEN=mmm1 /DEF=Mdm10pMdm12pMmm1p complex (predicted)
1774320_at	-0.0752724	-0.129506	0.051801	0.0425892	S. pombe SPAC17A2.15 /DEF=dubious
1769827_at	-0.0316973	-0.198261	0.229698	-0.0654809	S. pombe SPCC613.09 /DEF=tRNA-splicing endonuclease (subunit) (predicted)
1775338_at	-0.0917912	-0.0143611	0.00673135	0.0912612	S. pombe SPAC22H10.05c /DEF=CF I component (subunit A) (predicted)
1780074_at	-0.00531197	0.011583	0.00540956	0.029837	S. pombe SPBC25D12.04 /GEN=suc22 /DEF=ribonucleotide reductase
1775029_at	0.0692329	-0.0409263	0.18975	-0.146593	S. pombe SPAC30D11.09 /GEN=cwf19 /DEF=conserved eukaryotic protein
1772924_at	-0.168563	-0.268568	0.155537	0.173478	S. pombe SPBC3H7.05c /DEF=sequence orphan
1776007_at	0.0640602	0.0770521	-0.0869309	-0.0634457	S. pombe SPBC2D10.11c /DEF=histone binding
1769380_at	-0.00853793	0.131043	-0.500523	0.031352	S. pombe SPBC20F10.07 /DEF=hypothetical protein
1779009_at	0.0217139	-0.0125567	0.00516701	0.00362142	S. pombe SPAC22H12.04c /GEN=rps102 /DEF=40S ribosomal protein S3a
1778247_at	0.0273641	-0.0376584	0.0238298	-0.0199302	S. pombe SPBC685.07c /GEN=rpl2701 /DEF=60S ribosomal protein L27
1771576_at	0.346968	-0.0762796	-0.199742	-0.0562738	S. pombe SPAC1952.04c /DEF=dubious
1771917_at	0.0370394	-0.0213909	0.0523723	-0.0727634	S. pombe SPAC31G5.17c /GEN=rps1001 /DEF=40S ribosomal protein S10
1778505_at	0.0804358	0.0213633	0.237844	-0.235689	S. pombe SPCC4E9.01c /GEN=rec11 /DEF=region specific activator of recombination (PMID 8299939)
1772600_at	0.0886841	0.00148137	-0.00796636	-0.100134	S. pombe SPAC1071.01c /GEN=pta1 /DEF=CPF complex (PMID 14617822)
1778693_at	-0.141486	-0.110413	0.138062	0.104165	S. pombe SPBC337.11 /DEF=zinc binding dehydrogenase (predicted)
1777000_at	-0.163157	0.261103	-0.261269	0.141316	S. pombe SPCC126.06 /GEN=twf1 /DEF=twinfilin
1778385_at	0.0102514	-0.183114	0.0224209	0.0377795	S. pombe SPAC4F8.10c /DEF=calponin homology (CH) domain
1775790_at	-0.238905	0.163162	-0.492229	0.205439	S. pombe SPAPB18E9.04c /DEF=glycoprotein (predicted)
1771779_at	0.258084	-0.0739911	0.178199	-0.261124	S. pombe SPAC22E12.01 /DEF=triose phosphate transporter (predicted)
1770491_at	-0.268235	0.0223471	-0.113478	0.198219	S. pombe SPBC18E5.14c /DEF=hypothetical protein
1771640_at	-0.124803	0.0251163	-0.101076	0.0979382	S. pombe SPAC12G12.12 /DEF=NST UDP-galactose transporter
1775470_at	-0.204772	-0.428626	0.404222	0.333122	S. pombe SPAC5H10.10 /DEF=NADPH dehydrogenase (predicted)
1780124_at	0.025925	-0.172696	0.297402	-0.0100492	S. pombe SPAC2F7.13c /DEF=tryptophan-tRNA ligase (predicted)
1776411_at	0.0177533	-0.00445779	0.0328372	-0.0438859	S. pombe SPBP4H10.13 /GEN=rps2302 /DEF=40S ribosomal protein S23
1776453_at	-0.121046	-0.234518	0.0430724	0.077316	S. pombe SPBC3H7.01 /GEN=spo14 /DEF=WD repeat protein
1776847_at	-0.170228	-0.548788	0.295563	0.0928144	S. pombe SPAC22F3.03c /GEN=rdh54 /DEF=DEADDEAH box helicase (PMID 14551247)
1780238_at	0.0611807	-0.307068	0.122944	-0.0373351	S. pombe SPBC28F2.11 /DEF=transcription factor (predicted)
1777300_at	-0.0227496	-0.234689	0.0658579	-0.00156275	S. pombe SPBC23G7.15c /GEN=rpp202 /DEF=60S acidic ribosomal protein (P2B subunit)
1777783_at	-0.144525	0.235932	-0.389779	0.0220992	S. pombe SPAC824.05 /GEN=vps16 /DEF=involved in intracellular protein transport (predicted)
1779740_at	0.0856969	-0.0137707	0.170042	-0.0751263	S. pombe SPBC2F12.07c /GEN=rpl802 /DEF=60S ribosomal protein L8
1774363_at	-0.0174551	-0.27151	0.361034	0.04708	S. pombe SPBC1348.11 /DEF=transmembrane transporter pseudogene
1769928_at	-0.0401767	0.0337025	0.101797	-0.0883439	S. pombe SPBC11C11.04c /GEN=alp1 /DEF=tubulin specific chaperone (cofactor D)
1779290_at	0.107141	0.222395	-0.135604	-0.133815	S. pombe SPCC4G3.14 /DEF=DNAJ domain protein
1772994_at	-0.136397	0.0415223	-0.000371615	0.292504	S. pombe SPBC1215.01 /GEN=shy1 /DEF=SURF-family protein
1770077_at	0.17056	0.164908	-0.0918716	-0.083985	S. pombe SPCC4B3.13 /DEF=MatE family transporter
1772745_at	0.0378612	-0.0439425	0.0485729	-0.104975	S. pombe SPAC57A7.04c /GEN=pab1 /DEF=poly(A) binding
1776487_at	-0.779015	1.50222	-1.3985	0.293634	S. pombe SPAC513.02 /DEF=phosphoglycerate mutase family
1775065_at	-0.0624762	-0.0586977	-0.268137	0.250316	S. pombe SPBC1685.14c /DEF=conserved protein (mainly fungal and plant)
1771180_at	-0.0362895	-0.0643441	0.0163844	0.0808036	S. pombe SPAC1F12.06c /DEF=conserved protein (broad species distribution)
1770441_at	0.0744549	-0.132632	-0.0120373	0.0222985	S. pombe SPBC1289.15 /DEF=glucoprotein (predicted)
1772216_at	-0.276271	0.162986	-0.748806	0.309405	S. pombe SPAC19B12.08 /DEF=peptidase family C54
1775516_at	0.137702	-0.0238854	0.138792	-0.0119216	S. pombe SPBC17A3.06 /DEF=protein tyrosine phosphatase (ISS)
1776345_at	0.042442	-0.0383072	0.265996	-0.168262	S. pombe SPAC1F5.10 /GEN=tif412 /DEF=translation initiation factor
1770022_at	0.0910886	-0.0408007	0.181454	-0.0979408	S. pombe SPBC646.10c /DEF=ribonucleoprotein (RNP) complex (predicted) (PMID 12068309)
1775819_at	0.16383	-0.0599712	0.0976343	-0.0889734	S. pombe SPBC3B8.06 /DEF=conserved fungal protein
1773988_at	-0.0962531	0.273176	-0.187368	0.105003	S. pombe SPBC365.01 /DEF=sec14 cytosolic factor family
1769453_at	-0.0778519	0.152654	-0.0353724	-0.0861464	S. pombe SPAC22E12.04 /GEN=ccs1 /DEF=metallochaperone (PMID 15107426)
1771517_at	0.0503117	0.15713	-0.0653162	-0.125688	S. pombe SPBC4F6.05c /DEF=legume-like lectin family
1771861_at	-0.276558	0.31865	-0.557593	0.0167278	S. pombe SPAC458.04c /DEF=hypothetical protein
1776195_at	-0.224493	0.157933	-0.161764	0.129498	S. pombe SPBC725.04 /DEF=oxalyl-CoA decarboxylase (predicted)
1772411_at	0.0118535	0.196473	-0.136409	-0.029062	S. pombe SPBC1703.11 /DEF=conserved eukaryotic protein
1777478_at	0.0281839	-0.0438534	0.014287	-0.00752163	S. pombe SPAC31G5.03 /GEN=rps1101 /DEF=40S ribosomal protein S11
1769676_at	0.150479	-0.224322	0.213872	-0.223863	S. pombe SPCC31H12.05c /GEN=sds21 /DEF=serinethreonine protein phosphatase
1780061_at	0.0641575	-0.0247812	0.0907723	-0.0584367	S. pombe SPAC3H5.12c /GEN=rpl501 /DEF=60S ribosomal protein L5
1779226_at	0.230232	0.112839	-0.105967	-0.166944	S. pombe SPCC645.06c /GEN=rgf3 /DEF=localization cell division site (pers. comm. Jian-Qiu Wu and John R. Pringle)
1776231_at	0.0343253	0.297554	-0.0564159	-0.0333061	S. pombe SPAC1B3.10c /DEF=SEL1 repeat protein
1774798_at	-0.0579859	0.0830565	-0.0860271	0.0493844	S. pombe SPBC530.10c /GEN=anc1 /DEF=adenine nucleotide carrier (PMID 8675018)
1777596_at	-0.0259444	-0.0863186	0.0249542	-0.0722427	S. pombe SPCC736.10c /GEN=mrps8 /DEF=mitochondrial ribosomal protein s8
1770581_at	-0.0039018	-0.0240396	0.00905641	0.00267665	S. pombe SPBC336.10c /GEN=tif512 /DEF=translation initiation factor
1778445_at	-0.0880594	0.116372	-0.132878	0.141172	S. pombe SPAC1527.02 /GEN=sft2 /DEF=involved in intracellular protein transport
1776779_at	-0.166695	0.240335	-0.155737	0.060709	S. pombe SPAC19A8.10 /DEF=zinc finger protein
1777407_at	-0.118886	-0.148585	0.120469	0.750093	S. pombe SPCC965.11c /DEF=amino acid transporter (predicted)
1776840_at	0.0762081	0.0271978	-0.100254	-0.133178	S. pombe SPBC31F10.10c /DEF=zinc finger protein
1775747_at	0.0596666	-0.0250285	0.0968701	-0.12145	S. pombe SPBC29A10.06c /DEF=sequence orphan
1776652_at	-0.1074	0.057162	-0.349616	0.124676	S. pombe SPBC16H5.13 /DEF=WD repeat protein
1778993_at	0.153415	-0.124296	0.314487	-0.0581579	S. pombe SPAC4D7.09 /GEN=tif223 /DEF=translation initiation factor
1777794_at	0.0355902	-0.112182	0.366352	-0.0400473	S. pombe SPBC8D2.13 /DEF=involved in snoRNP biogenesis (PMID 12228251) (predicted)
1771241_at	-0.00107257	-0.0179577	-0.000322342	0.0422703	S. pombe SPAC3A11.07 /DEF=NADH dehydrogenase (predicted)
1779188_at	-0.475327	0.416614	-0.720563	0.662324	S. pombe SPAC1F7.12 /GEN=yakC /DEF=aldoketo reductase
1774865_at	0.239169	-0.0590884	0.813879	-0.160981	S. pombe SPCPB16A4.04c /DEF=methyltransferase (predicted)
1774133_at	-0.0654685	-0.0212237	0.0168775	0.0103763	S. pombe SPCC1620.10 /GEN=cwf26 /DEF=conserved eukaryotic protein
1773189_at	0.158267	-0.117481	0.131197	-0.21371	S. pombe SPAC2C4.05 /DEF=cornichon family
1776328_at	0.0969276	-0.128546	0.0497942	-0.158918	S. pombe SPAC343.17c /DEF=WD repeat protein
1772419_at	-0.069561	-0.014438	0.0505753	0.0280336	S. pombe SPAC22F3.10c /GEN=gcs1 /DEF=glutamate--cysteine ligase (PMID 8619315)
1776128_at	0.117292	-0.259325	0.196145	-0.343917	S. pombe SPBC16A3.07c /DEF=sequence orphan
1775343_at	-0.032992	-0.103009	0.188348	-0.0244322	S. pombe SPAC7D4.13c /DEF=sequence orphan
1774628_at	0.109624	-0.115825	0.455863	-0.297127	S. pombe SPCC1450.10c /DEF=iron only hydrogenase large subunit (predicted)
1775527_at	0.0358623	-0.00949446	-0.26523	0.128096	S. pombe SPAC4A8.10 /DEF=DUF676
1771563_at	0.157077	-0.165316	0.248776	-0.129126	S. pombe SPCC970.03 /DEF=cytochrome b5 reductase (predicted)
1770401_at	0.0242974	-0.0558678	0.00977071	-0.0155188	S. pombe SPBC776.01 /GEN=rpl29 /DEF=60S ribosomal protein L29
1769565_at	-0.0467386	-0.0144984	-0.246633	0.0992371	S. pombe SPBC25H2.14 /DEF=conserved eukaryotic protein
1778396_at	-0.0452817	0.134252	-0.425232	0.00170199	S. pombe SPAC25B8.19c /DEF=transcription factor (predicted)
1769754_at	-0.376485	0.675953	-1.4061	0.0513709	S. pombe SPAC32A11.02c /DEF=hypothetical protein
1773310_at	-0.187505	0.174986	-0.148475	0.178617	S. pombe SPCC594.04c /DEF=conserved protein (mainly bacteria and plants)
1773478_at	0.028594	0.127408	-0.103399	-0.104102	S. pombe SPBC1921.06c /GEN=pvg3 /DEF=beta-1,3-galactosyltransferase (pers. comm. Robert Trimble)
1771086_at	0.0309347	-0.0206375	0.0479539	-0.0343609	S. pombe SPAC1F7.13c /GEN=rpl801 /DEF=60S ribosomal protein L2A
1770872_at	-0.22381	0.0645205	-0.0447416	0.0898094	S. pombe SPCC777.15 /DEF=dihydrouridine synthase (predicted)
1774319_at	0.0831607	-0.000701904	0.0431846	-0.115117	S. pombe SPAC2F3.15 /DEF=serinethreonine protein kinase (predicted)
1770560_at	0.0870552	0.113161	-0.0618738	-0.0742102	S. pombe SPAC29A4.06c /DEF=conserved eukaryotic protein
1779125_at	-0.264263	0.173216	-0.402353	0.0812372	S. pombe SPCC126.07c /DEF=zinc finger protein
1772715_at	-0.413379	0.748778	-0.735667	0.281833	S. pombe SPAC5H10.02c /DEF=conserved fungal protein
1778870_at	0.0134172	-0.139043	0.484899	0.0258023	S. pombe SPAC17H9.08 /DEF=mitochondrial carrier
1773090_at	-0.0112467	-0.292773	0.183846	0.0759042	S. pombe SPAC27D7.04 /GEN=omt2 /DEF=pterin-4-alpha-carbinolamine dehydratase (predicted)
1774336_at	-0.170689	0.287692	-0.0527458	-0.665462	S. pombe SPBC947.04 /DEF=glycoprotein (predicted)
1779215_at	0.0473696	-0.0953045	0.162203	-0.204719	S. pombe SPCC663.11 /DEF=sequence orphan
1774044_at	-0.0774984	-0.251096	0.490726	0.074371	S. pombe SPBPB2B2.10c /DEF=galactose-1-phosphate uridylyltransferase (predicted)
1779984_at	0.0850331	-0.227033	0.196863	-0.0314782	S. pombe SPBC30D10.06 /GEN=lsm4 /DEF=U6 snRNA-associated protein
1769701_at	0.152334	-0.212911	0.146289	-0.111181	S. pombe SPAC227.17c /DEF=hypothetical protein
1778269_at	-0.0695483	-0.246467	0.127223	0.108118	S. pombe SPBC9B6.11c /DEF=cr4p-like
1779758_at	0.0274706	-0.11054	0.259215	-0.00107924	S. pombe SPAC17G8.09 /GEN=shg1 /DEF=SET1 complex (TAP) (PMID 12488447)
1771601_at	-0.167034	-0.483419	0.247588	0.11514	S. pombe SPBC1703.08c /DEF=5-formyltetrahydrofolate cyclo-ligase activity (predicted)
1771666_at	0.0856447	-0.0570358	0.149469	-0.172612	S. pombe SPCC584.04 /GEN=sup35 /DEF=translation release factor eRF3 (class II) (PMID 9701287)
1777745_at	-0.093496	0.102945	-0.201045	0.0757491	S. pombe SPAC222.13c /DEF=6-phosphofructo-2-kinase (predicted)
1777739_at	-0.0827239	0.197845	-0.0910273	-0.112811	S. pombe SPBC1604.03c /DEF=sequence orphan
1780139_at	-0.00623258	0.0869525	0.0344992	-0.0381384	S. pombe SPACUNK4.14 /DEF=BRCT domain
1779708_at	-0.271888	0.267849	-0.728291	0.126543	S. pombe SPAC23A1.14c /DEF=cystathionine gamma-synthase activity (predicted)
1778901_at	-0.0202573	-0.0650183	0.178746	0.0445328	S. pombe SPAC2F7.15 /GEN=rsm24 /DEF=mitochondrial ribosomal protein small subunit s24
1776730_at	-0.206512	-0.386229	0.0421365	0.889208	S. pombe SPAC21E11.04 /GEN=ppr1 /DEF=L-azetidine-2-carboxylic acid acetyltransferase (PMID 12761200)
1773130_at	0.207569	-0.095616	0.526189	-0.302227	S. pombe SPAC23H4.15 /DEF=involved in RNA processing (predicted)
1775793_at	0.17566	-0.074125	0.816182	-0.0699145	S. pombe SPBC2D10.15c /DEF=peptidyl-tRNA hydrolase (predicted)
1779990_at	0.0314627	0.0432253	-0.0731271	-0.190121	S. pombe SPAC22E12.16c /GEN=pik1 /DEF=phosphatidylinositol kinase
1770794_at	0.0267598	-0.0584323	0.0204859	-0.000636737	S. pombe SPBC16E9.03c /DEF=hypothetical protein
1777426_at	-0.0396271	0.115886	-0.268797	-0.0710475	S. pombe SPAC9G1.05 /DEF=WD repeat protein
1773869_at	-0.00148424	0.287446	0.00619888	-0.0651782	S. pombe SPBC1604.19c /DEF=TRAPP (predicted)
1770557_at	-0.0318429	0.0773624	-0.194567	0.00231393	S. pombe SPAC1250.01 /GEN=snf21 /DEF=chromatin remodeling complex (predicted)
1769926_at	0.0596479	0.0467548	-0.0616124	-0.106585	S. pombe SPBC776.02c /GEN=dis2 /DEF=PP1
1773488_at	0.0986493	-0.188678	0.444999	-0.0766856	S. pombe SPBC15D4.06 /DEF=N-acetyltransferase (predicted)
1770021_at	-0.029672	0.0605383	-0.0880931	0.0658245	S. pombe SPAC1851.04c /DEF=DUF1339
1779793_at	0.0513643	0.016943	0.0675459	0.00160344	S. pombe SPBC3H7.12 /DEF=sequence orphan
1772345_at	-0.0586061	0.0210107	-0.0183525	0.0715895	S. pombe SPBC21C3.04c /DEF=mitochondrial ribosomal protein subunit L34
1778179_at	0.136854	-0.110994	-0.0283028	-0.192202	S. pombe SPBPB2B2.03c /DEF=pseudo-very degraded permease
1775225_at	0.0465193	-0.201149	0.420113	-0.268642	S. pombe SPACUNK4.09 /DEF=hypothetical protein
1778387_at	-0.0855033	-0.141947	0.112618	0.0440016	S. pombe SPCC645.10 /DEF=tRNA nucleotidyltransferase (predicted)
1779831_at	-0.0201492	0.0149342	0.0200844	-0.0872469	S. pombe SPAC22F3.05c /GEN=alp41 /DEF=ADP-ribosylation factor
1779386_at	-0.376276	0.301275	-0.700074	0.428469	S. pombe SPCC4G3.03 /DEF=WD repeat protein
1774692_at	-0.0530933	0.0218255	0.0218862	-0.00279458	S. pombe SPAC18B11.11 /DEF=GTPase activating protein (predicted)
1778150_at	0.726088	-0.0826198	0.203825	-0.639912	S. pombe SPBPB2B2.04 /DEF=pseudo-very degraded transporter
1776098_at	0.122314	-0.233003	0.675365	-0.142878	S. pombe SPBC1604.09c /DEF=exonuclease (predicted)
1772254_at	0.191831	-0.162018	0.277565	-0.246184	S. pombe SPBC13G1.08c /GEN=ash2 /DEF=SET1 complex (TAP) (PMID 12488447)
1774724_at	0.0878058	-0.026467	0.185431	-0.0595776	S. pombe SPBC106.15 /GEN=idi1 /DEF=isopentenyl-diphosphate delta-isomerase (PMID 7744766)
1769669_at	0.0278145	-0.0242739	0.0471465	-0.0401506	S. pombe SPBC18H10.14 /GEN=rps1601 /DEF=40S ribosomal protein S16
1779880_at	0.0325505	-0.0273997	0.383993	-0.00831731	S. pombe SPCC895.09c /DEF=RNA helicase
1778264_at	-0.0923729	0.00952975	0.0446361	0.0801236	S. pombe SPBC16A3.19 /DEF=conserved eukaryotic protein
1775088_at	-0.181338	0.0920455	0.0044934	-0.0118882	S. pombe SPAC19D5.03 /GEN=cid1 /DEF=nucleotidyltransferase
1772390_at	0.0806567	-0.0358146	0.197708	-0.230076	S. pombe SPBP8B7.31 /DEF=acid phosphatase (predicted) (PMID 10889041)
1772666_at	0.0785987	-0.0993675	0.0178111	-0.439132	S. pombe SPCC74.02c /DEF=CPF complex (PMID 14617822)
1769540_at	0.0409492	-0.0398715	0.336803	-0.252715	S. pombe SPBC336.02 /DEF=methylase
1774954_at	-0.0830027	0.0330194	-0.0328105	0.0967309	S. pombe SPBC21D10.06c /DEF=glycoprotein (predicted)
1769899_at	-0.0674016	0.112659	-0.0519597	0.0813163	S. pombe SPAC688.10 /GEN=rev3 /DEF=DNA polymerase zeta (catalytic subunit)
1776511_at	-0.563139	1.14292	-1.90916	0.189435	S. pombe SPAC4H3.03c /DEF=conserved protein (mainly bacterial)
1776911_at	-0.0171172	-0.0184377	0.0682885	-0.0367896	S. pombe SPAC343.18 /DEF=zinc finger protein
1772954_at	0.126622	0.0165361	0.0779607	-0.282932	S. pombe SPBC56F2.08c /DEF=RNA-binding protein
1774278_at	-0.0519918	0.0244951	0.0665973	-0.133612	S. pombe SPBC776.13 /GEN=cnd1 /DEF=condensin subunit
1776389_at	0.125302	-0.110738	0.167959	-0.132985	S. pombe SPAC3A12.13c /DEF=conserved eukaryotic protein
1769738_at	0.0557181	-0.0196457	0.237864	-0.291859	S. pombe SPAC3F10.17 /DEF=conserved eukaryotic protein
1775240_at	0.160411	-0.434192	0.520713	-0.0789302	S. pombe SPCC663.13c /DEF=N-acetyltransferase (predicted)
1773163_at	0.0891841	-1.15385	0.215496	1.66463	S. pombe SPBC1271.07c /DEF=N-acetyltransferase (predicted)
1776381_at	-0.00231075	0.029582	-0.0163387	-0.149593	S. pombe SPAC7D4.14c /DEF=sequence orphan
1771928_at	-0.0463632	0.0915384	-0.0865691	0.0618852	S. pombe SPCC1672.06c /GEN=asp1 /DEF=acid phosphatase activity (predicted)
1776598_at	-0.0848738	0.0340843	-0.176071	0.153053	S. pombe SPAC29A4.05 /GEN=cam2 /DEF=calmodulin (predicted)
1778022_at	-0.173749	0.028211	-0.048454	0.52325	S. pombe SPBC16A3.17c /DEF=transporter
1769930_at	0.0239503	0.135043	-0.0634616	-0.0880868	S. pombe SPBP19A11.04c /GEN=mor2 /DEF=involved in cellular morphogenesis (required) (PMID 12234926)
1773373_at	-0.0201317	0.02679	-0.145618	0.0339711	S. pombe SPBC725.11c /GEN=php2 /DEF=CCAAT-box binding factor complex (PMID 1899284)
1773410_at	0.0583601	-0.576886	0.431019	-0.0349967	S. pombe SPAC23D3.12 /DEF=inorganic phosphate transporter (predicted)
1777582_at	0.0490077	0.0592693	-0.00740465	0.0436077	S. pombe SPAC56F8.06c /DEF=dolichyl-phosphate-glucose-glycolipid alpha-glucosyltransferase activity
1769933_at	-0.00198428	-0.0190862	0.0607764	0.136905	S. pombe SPBC543.04 /DEF=conserved eukaryotic protein
1774136_s_at	0.0126953	-0.00638421	-0.0496667	0.0362539	S. pombe SPBC839.15c /GEN=ef1a-c /DEF=translation elongation factor (alpha 1 subunit) (PMID 9099890)
1770024_at	-0.0565774	0.541728	-0.435659	0.0481049	S. pombe SPBC19F5.01c /GEN=puc1 /DEF=cyclin
1770338_at	0.00262515	-0.0983365	0.267751	0.0394789	S. pombe SPAC4G8.11c /GEN=atp10 /DEF=F1-F0 ATPase assembly potein (predicted)
1770477_at	-0.283671	0.295926	-0.361836	0.21978	S. pombe SPAC14C4.10c /DEF=Nudix family hydrolase
1776329_at	0.0416387	-0.0748256	0.162611	-0.0913916	S. pombe SPCC1322.12c /GEN=bub1 /DEF=serinethreonine protein kinase
1779208_at	-0.284962	0.224546	-0.620515	0.596621	S. pombe SPAC1002.12c /DEF=succinate-semialdehyde dehydrogenase (predicted)
1774268_at	-0.0696964	-0.0631803	0.0558027	0.110936	S. pombe SPBC18E5.01 /DEF=cycloisomerase 2 family
1775286_at	-0.0649522	0.136751	0.0342744	0.0124982	S. pombe SPBC19C7.08c /DEF=leucine carboxyl methyltransferase (predicted)
1778041_at	-0.04798	-0.548906	-1.21014	0.637729	S. pombe SPBPB2B2.18 /DEF=dubious
1776495_at	-0.0242729	-0.199245	0.208395	0.0425339	S. pombe SPBC582.06c /DEF=sequence orphan
1773456_at	-0.0730642	0.160082	-0.0817207	0.0586882	S. pombe SPAPB1A10.02 /DEF=sequence orphan
1773079_at	0.117597	-0.0507965	0.072518	-0.294618	S. pombe SPAC14C4.11 /DEF=polyphosphate synthetase (predicted)
1776476_at	0.124298	-0.111866	0.399162	-0.0832141	S. pombe SPCC1393.09c /DEF=RWD domain
1772404_at	0.0861298	0.165318	-0.0233313	-0.117803	S. pombe SPBC1685.15c /GEN=klp6 /DEF=kinesin-like protein
1769310_at	0.134293	-0.250373	0.643605	-0.0784795	S. pombe SPCC18.05c /DEF=WD repeat protein
1777436_at	0.157361	-0.637996	0.205947	-0.298534	S. pombe SPAC869.05c /DEF=sulfate transporter activity (predicted)
1777815_at	-0.0271905	0.053312	0.0488005	-0.0757214	S. pombe SPAC1687.20c /GEN=mis6 /DEF=localization centromere
1775787_at	0.0264333	-0.0292028	-0.180949	0.432403	S. pombe SPCC1020.03 /DEF=CDF metal cation transporter (predicted)
1769417_at	0.0430355	-0.0389541	0.4702	-0.0182238	S. pombe SPBC1709.13c /DEF=histone lysine methyltransferase (predicted)
1769960_at	0.0391792	0.0303949	0.108795	-0.138768	S. pombe SPAC1F12.05 /DEF=conserved fungal protein
1779015_at	0.256301	-0.141693	0.274439	-0.329926	S. pombe SPBC1E8.03c /DEF=sequence orphan
1773414_at	0.094691	-0.0760091	0.0779457	-0.034455	S. pombe SPBC8D2.01 /GEN=gsk31 /DEF=serinethreonine protein kinase
1777775_at	0.0565675	-0.0261774	0.015722	-0.0098362	S. pombe SPBC11C11.11c /DEF=DEADDEAH box helicase
1772787_at	-0.20349	0.401895	-0.371427	0.156177	S. pombe SPCC188.08c /GEN=ubp22 /DEF=ubiquitin C-terminal hydrolase activity
1771885_at	0.184079	-0.123479	0.338367	-0.125832	S. pombe SPBC902.04 /DEF=rrm RNA recognition motif
1774581_at	0.112446	0.455796	-0.399835	-0.123007	S. pombe SPBC3B8.10c /DEF=NLI interacting factor family
1774996_at	-0.0313009	0.0563078	0.117795	-0.209787	S. pombe SPBC3B8.05 /DEF=conserved eukaryotic protein
1774386_at	-0.0375837	0.0129859	0.0712255	-0.267629	S. pombe SPBC776.12c /GEN=hsk1 /DEF=serinethreonine protein kinase
1769559_at	0.090175	-0.0641162	0.0151587	-0.0881437	S. pombe SPAC8C9.09c /DEF=sequence orphan
1775243_at	0.0668097	-0.00597731	0.189413	-0.19955	S. pombe SPBC31F10.05 /DEF=sequence orphan
1780158_at	-0.167654	0.0365966	-0.0547291	0.108428	S. pombe SPAC3A11.14c /GEN=pkl1 /DEF=kinesin-like protein
1771823_at	0.0554717	0.0898504	-0.449104	-0.0479183	S. pombe SPCC1739.10 /DEF=membrane anchored protein (predicted)
1779301_at	-0.134947	0.127348	-0.0840095	0.216718	S. pombe SPAC12B10.08c /DEF=hypothetical protein
1774771_at	-0.0545343	0.205289	-0.082366	-0.0432857	S. pombe SPBC27B12.04c /DEF=conserved eukaryotic protein
1777583_at	-0.0323315	-0.00450802	0.0593026	-0.0410646	S. pombe SPAC10F6.01c /DEF=sulfite reductase (predicted)
1774306_at	0.144047	-0.0955404	0.161625	-0.137274	S. pombe SPBC21.05c /GEN=ral2 /DEF=kelch repeat protein
1778849_at	0.15592	0.0170329	0.0759296	-0.0629778	S. pombe SPCC126.14 /GEN=prp18 /DEF=involved in mRNA splicing (predicted) (2nd step) (PMID 12212850)
1777052_at	0.0574287	-0.0440791	0.021876	-0.0146532	S. pombe SPBP8B7.25 /GEN=cyp4 /DEF=cyclophilin
1769846_at	0.113396	0.0528202	-0.0265408	-0.241626	S. pombe SPBC405.02c /DEF=hypothetical protein
1780252_at	0.116798	-0.432526	0.634968	-0.0374196	S. pombe SPAC227.16c /DEF=GINS complex
1775940_at	0.109299	-0.0895077	0.289493	-0.309529	S. pombe SPBC18E5.03c /GEN=sim4 /DEF=localization centromere
1778372_at	-0.0925716	0.173918	-0.354902	0.0486501	S. pombe SPCC663.15c /DEF=sequence orphan
1771754_at	-0.202247	1.89569	-0.760927	0.116763	S. pombe SPBC1773.06c /DEF=alcohol dehydrogenase (predicted)
1780109_at	0.120458	-0.0823943	0.233582	-0.0267992	S. pombe SPCC2H8.05c /DEF=hypothetical protein
1778868_s_at	-0.466061	0.0146132	-0.121275	0.295814	S. pombe SPCC285.07c /GEN=wtf18 /DEF=wtf element
[truncated: 2,881 more rows]

## Sheet: CESR_UP
Probe Set ID	[set3D, DMSO]	[set3D, LatA]	[Wild Type, DMSO]	[Wild type, LatA]	Target Description
1770678_at	-0.833157	0.46569	-1.4816	0.468244	S. pombe SPAC2E1P3.01 /DEF=zinc binding dehydrogenase
1778602_at	-0.529983	0.595392	-1.35563	0.192717	S. pombe SPAC3C7.05c /DEF=glycosyl hydrolase family 76
1771667_at	-0.0424719	0.0465581	-0.819855	0.0652749	S. pombe SPAC823.03 /DEF=serinethreonine protein kinase (predicted)
1778068_at	-0.832878	0.229288	-2.87367	0.0770505	S. pombe SPBC56F2.06 /DEF=hypothetical protein
1777716_at	-0.309738	0.118596	-1.61488	0.0256303	S. pombe SPAC637.03 /DEF=hypothetical protein
1778336_at	-0.132575	0.381687	-0.611371	-0.0149142	S. pombe SPACUNK4.16c /DEF=glycosyl transferase family 20
1771285_at	-0.0540997	0.245369	-0.0505152	0.110278	S. pombe SPBC20F10.03 /DEF=conserved eukaryotic protein
1772299_at	0.198576	0.0449254	-0.144047	-0.111321	S. pombe SPCC736.15 /DEF=hypothetical protein
1776433_at	-0.0464392	-0.0314398	-0.112623	0.126396	S. pombe SPACUNK4.15 /DEF=hypothetical protein
1776482_at	-0.165287	0.305583	-0.498212	-0.056983	S. pombe SPCC830.07c /GEN=psi1 /DEF=DNAJ domain protein
1770498_at	0.127927	0.100391	-0.0622813	-0.136352	S. pombe SPAC31A2.12 /DEF=arrestin family
1772771_at	-0.158915	0.457813	-0.607881	0.0108423	S. pombe SPBC21H7.06c /DEF=conserved eukaryotic protein
1770499_at	-0.443868	0.511613	-1.34233	0.0564232	S. pombe SPAC26F1.04c /DEF=zinc binding dehydrogenase (predicted)
1775687_at	-0.321712	0.197008	-0.827728	0.102625	S. pombe SPBC32H8.07 /GEN=git5 /DEF=heterotrimeric G protein (beta subunit) (PMID 11238401)
1772151_at	-0.137355	0.415803	-0.411043	0.215083	S. pombe SPAC513.07 /DEF=cinnamoyl-CoA reductase (predicted)
1772124_at	-0.315066	0.187489	-0.614776	0.0417865	S. pombe SPAC9E9.11 /GEN=plr1 /DEF=pyridoxal reductase (PMID 10438489)
1773133_at	-0.29943	1.45059	-1.25989	0.122298	S. pombe SPAC27D7.09c /DEF=predicted N-terminal signal sequence
1778875_at	-0.52229	0.30513	-1.67645	0.261562	S. pombe SPCC191.01 /DEF=sequence orphan
1778543_at	-0.0250845	0.0748914	0.0136372	-0.1067	S. pombe SPBC20F10.10 /DEF=cyclin
1776259_at	-0.643047	0.558	-1.35956	0.266956	S. pombe SPBC215.11c /DEF=aldoketo reductase
1776900_at	-0.665554	0.628449	-1.97895	0.404607	S. pombe SPAC15E1.02c /DEF=sequence orphan
1770601_at	-0.384699	0.854552	-1.02013	0.362028	S. pombe SPCC1393.12 /DEF=sequence orphan
1772155_at	0.239922	0.153831	0.115051	-0.556084	S. pombe SPAC11D3.13 /DEF=ThiJ domain
1769838_at	0.242615	2.46251	-0.767653	-0.0357424	S. pombe SPBC24C6.09c /DEF=phosphoketolase (predicted)
1769725_at	-0.815598	0.760302	-2.52118	0.291963	S. pombe SPAC22H10.13 /GEN=zym1 /DEF=metallothionein (PMID 12050156)
1776795_at	0.708228	2.02533	-1.94046	-0.17553	S. pombe SPAC23H3.15c /DEF=serine-rich protein
1773394_at	-0.643926	0.678462	-1.34078	0.354139	S. pombe SPAC26F1.14c /DEF=flavoprotein (predicted)
1772577_at	-0.101662	0.0378984	-0.491882	0.225769	S. pombe SPBC106.02c /DEF=ParBc-like nuclease domain (SMART)
1776181_at	0.0402819	0.497711	-0.935055	-0.0202379	S. pombe SPBC3E7.02c /GEN=hsp16 /DEF=heat shock protein
1775082_at	-0.445023	0.722244	-0.522447	0.317074	S. pombe SPAC22G7.11c /DEF=conserved fungal protein
1778902_at	-0.419896	0.434783	-1.01522	0.157602	S. pombe SPAC22E12.03c /DEF=THIJPFPI family protein
1772526_at	-0.113019	0.124048	-0.377045	0.0162115	S. pombe SPAC3A11.06 /GEN=mvp1 /DEF=phosphoinositide binding (predicted)
1775503_at	-0.12475	0.0824595	-0.24395	0.135138	S. pombe SPAC3A12.18 /GEN=zwf1 /DEF=glucose-6-phosphate 1-dehydrogenase (predicted)
1773037_at	-0.177082	0.0838531	-0.548272	0.278637	S. pombe SPBP4H10.10 /DEF=rhomboid family protease
1770069_at	-0.108164	0.0461025	-0.635487	0.0462195	S. pombe SPCC1183.11 /DEF=MS ion channel
1780048_at	0.0429014	-0.109703	-0.152824	0.118799	S. pombe SPAC57A10.09c /DEF=HMG box
1775119_at	-0.257974	0.0817156	-1.02906	0.319057	S. pombe SPCC417.05c /GEN=cfh2 /DEF=Chs Four Homologue (pers. comm. Henar Montero)
1769567_at	-0.180638	-0.305524	-0.363026	0.712473	S. pombe SPBC1773.17c /DEF=glycerate and formate dehydrogenase (predicted)
1779501_at	-0.505739	0.506553	-1.14359	0.338361	S. pombe SPAPB24D3.08c /DEF=NADP dependent oxidoreductase (predicted)
1779585_at	-0.0195948	-0.48788	0.166423	0.393427	S. pombe SPBC1348.12 /DEF=zinc finger protein
1772425_at	-0.293225	0.0839736	-1.19192	0.17566	S. pombe SPAC19G12.09 /DEF=oxidoreductase (predicted)
1779339_at	-0.171956	-0.0156342	-0.434733	0.842281	S. pombe SPAC57A7.05 /DEF=hypothetical protein
1773549_at	-0.194345	0.205269	-0.380896	0.208611	S. pombe SPBC1289.14 /DEF=adducin N-terminal domain protein
1775300_at	-0.944713	0.472365	-1.85247	0.0792093	S. pombe SPBC725.03 /DEF=hypothetical protein
1771895_at	-0.205341	0.317338	-0.651667	0.158522	S. pombe SPBC23G7.06c /DEF=conserved eukaryotic protein
1777025_at	-0.31404	0.73385	-0.839686	0.158651	S. pombe SPAC3C7.13c /DEF=glucose-6-phosphate 1-dehydrogenase (predicted)
1770524_at	-0.0359062	-0.14341	0.230851	-0.0187588	S. pombe SPBC12D12.07c /DEF=thioredoxin (ISS)
1779607_at	-0.253656	0.253622	-0.95767	-0.0164747	S. pombe SPBC1105.14 /DEF=zinc finger protein
1772245_at	-0.449189	0.456189	-1.1556	0.189829	S. pombe SPAC4D7.02c /DEF=glycerophosphoryl diester phosphodiesterase (predicted)
1776487_at	-0.779015	1.50222	-1.3985	0.293634	S. pombe SPAC513.02 /DEF=phosphoglycerate mutase family
1772216_at	-0.276271	0.162986	-0.748806	0.309405	S. pombe SPAC19B12.08 /DEF=peptidase family C54
1772715_at	-0.413379	0.748778	-0.735667	0.281833	S. pombe SPAC5H10.02c /DEF=conserved fungal protein
1779386_at	-0.376276	0.301275	-0.700074	0.428469	S. pombe SPCC4G3.03 /DEF=WD repeat protein
1776511_at	-0.563139	1.14292	-1.90916	0.189435	S. pombe SPAC4H3.03c /DEF=conserved protein (mainly bacterial)
1771754_at	-0.202247	1.89569	-0.760927	0.116763	S. pombe SPBC1773.06c /DEF=alcohol dehydrogenase (predicted)
1775843_at	-0.193305	0.513251	-0.989872	-0.100177	S. pombe SPCC338.18 /DEF=sequence orphan
1769351_at	0.000347773	0.161165	-0.253062	0.00345167	S. pombe SPAC4F10.20 /GEN=grx1 /DEF=arsenate reductase (glutaredoxin) activity
1776026_at	-0.221133	0.137576	-1.21962	0.328658	S. pombe SPBC119.03 /DEF=S-adenosylmethionine-dependent methyltransferase activity (predicted)
1770046_at	-0.264564	0.305989	-0.292137	0.135791	S. pombe SPAC11E3.14 /DEF=conserved fungal protein
1777798_at	-0.0046463	0.152738	-0.595747	-0.0388387	S. pombe SPCC576.04 /DEF=hypothetical protein
1771684_at	-0.096474	0.256027	-0.431853	-0.016758	S. pombe SPBC215.05 /GEN=gpd1 /DEF=glycerol-3-phosphate dehydrogenase
1770291_at	-0.371057	0.250845	-0.95895	0.234751	S. pombe SPAC2C4.17c /DEF=MS ion channel
1771035_at	-0.63437	0.356693	-1.69529	0.0923602	S. pombe SPBC725.10 /DEF=similar to peripheral-type benzodiazepine receptor
1780142_at	-0.618069	0.29083	-1.1462	0.393988	S. pombe SPBC16A3.02c /DEF=quinone oxidoreductase (predicted)
1776431_at	0.029912	0.586219	-0.532597	-0.0328585	S. pombe SPBC21C3.19 /DEF=conserved fungal protein
1776141_at	-0.613249	0.596392	-1.78988	0.0322847	S. pombe SPBC365.12c /GEN=ish1 /DEF=involved in response to stress (PMID 11751918)
1772266_at	-0.54556	0.749997	-1.158	0.225513	S. pombe SPAC2F3.05c /DEF=aldoketo reductase
1770446_at	-0.226528	0.0973609	-0.645531	0.0899944	S. pombe SPAC4G9.11c /GEN=cmb1 /DEF=HMG box
1776121_at	-0.245352	0.151057	-0.413752	0.0836808	S. pombe SPCC61.03 /DEF=conserved protein (broad species distribution)
1774579_at	0.130055	0.405761	-0.435786	-0.0120948	S. pombe SPAC328.03 /GEN=tps1 /DEF=alpha,alpha-trehalose-phosphate synthase (UDP-forming)
1770944_at	-0.158029	-0.390157	0.225087	2.28682	S. pombe SPBC1271.08c /DEF=hypothetical protein
1778210_at	-0.242655	0.412993	-0.762587	0.0144965	S. pombe SPBC30D10.14 /DEF=dienelactone hydrolase family
1771600_at	-0.0946515	0.0750853	-0.2262	0.0213076	S. pombe SPBC12C2.04 /DEF=dehydrogenase (predicted)
1770873_at	0.184812	0.358505	-0.179457	-0.0426626	S. pombe SPBC725.02 /GEN=mpr1 /DEF=speedy
1770187_at	0.0834169	0.566478	-0.103805	-0.169392	S. pombe SPAPB1A11.03 /DEF=FMN dependent dehydrogenase
1778976_at	0.291792	2.48407	-1.15129	-0.043155	S. pombe SPAC139.05 /DEF=succinate semialdehyde dehydrogenase (predicted)
1772532_at	-0.253179	0.000952403	-0.266932	0.233571	S. pombe SPAC521.03 /DEF=short chain dehydrogenase (predicted)
1771036_at	-0.425693	1.37647	-1.40289	-0.0237989	S. pombe SPCC757.03c /DEF=conserved fungal protein
1770131_at	-0.166809	0.198887	-0.398888	0.0366338	S. pombe SPCC330.06c /GEN=pmp20 /DEF=peroxiredoxin
1774606_at	-0.110297	0.376505	-0.390238	0.0295849	S. pombe SPAC23D3.11 /DEF=1-acyl dihydroxyacetone phosphate reductase (predicted)
1774269_at	0.234954	-0.322714	0.00131512	-0.154754	S. pombe SPBC660.05 /DEF=hypothetical protein
1779895_at	-0.0210886	0.0555232	0.0291557	-0.0269127	S. pombe SPAC4A8.03c /GEN=ptc4 /DEF=phosphoprotein phosphatase activity
1769347_at	-0.394826	0.1457	-0.636759	0.239493	S. pombe SPCC1235.01 /DEF=glycoprotein (predicted)
1776737_at	-0.0200218	-0.0546529	-1.00681	0.0513776	S. pombe SPBC660.06 /DEF=hypothetical protein
1769334_at	-0.106863	0.280767	-0.511291	0.0577536	S. pombe SPBC11C11.06c /DEF=hypothetical protein
1775581_at	0.0459309	0.205104	-0.060744	-0.391955	S. pombe SPCC320.03 /DEF=transcriptional regulator (predicted)
1776942_at	-0.0421813	0.288388	-0.320222	-0.0362781	S. pombe SPCC1494.03 /DEF=hypothetical protein
1774479_at	-0.216078	0.19569	-0.493212	0.126572	S. pombe SPBC2A9.02 /DEF=dyhydroflavanol-4-reductase (predicted)
1779886_at	-0.14288	0.132331	-0.415952	0.0801077	S. pombe SPAC607.08c /DEF=conserved eukaryotic protein
1770422_at	0.328665	1.63448	-1.84294	-0.112835	S. pombe SPBC16E9.16c /DEF=pseudogene
1772808_at	0.157831	0.370779	-0.946657	-0.00904655	S. pombe SPAC16A10.01 /DEF=conserved protein (mainly fungal and bacterial)
1772077_at	-0.0385911	0.148259	-0.225815	0.0215693	S. pombe SPAC9E9.04 /DEF=conserved eukaryotic protein
1777651_at	-0.596345	0.559464	-0.89531	0.3682	S. pombe SPCC965.06 /DEF=potassium channel subunit ??? (predicted)
1770356_at	0.292484	0.0464414	-0.0340335	-0.0840597	S. pombe SPCC63.14 /DEF=sequence orphan
1770642_at	-0.216949	0.355798	-0.417628	0.222728	S. pombe SPCC1020.10 /GEN=oca2 /DEF=serinethreonine protein kinase (predicted)
1778298_at	-0.447258	0.569982	-0.373275	0.389509	S. pombe SPBC1773.05c /GEN=tms1 /DEF=dehydrogenase (PMID 8223615)
1776977_at	-0.364124	1.37517	-0.375922	0.366822	S. pombe SPAC22A12.17c /DEF=short chain dehydrogenase (predicted)
1773509_at	0.0759951	3.30002	-1.98092	-0.0750535	S. pombe SPAC4H3.08 /DEF=short chain dehydrogenase (predicted)
1778072_at	-0.0869865	0.262237	-0.462878	0.0192931	S. pombe SPAC2C4.15c /DEF=UBX domain
1779757_at	-0.616255	0.718263	-1.24511	0.147055	S. pombe SPCC16A11.15c /DEF=sequence orphan
1776939_at	-0.457669	0.220414	-1.19173	0.302995	S. pombe SPCC338.12 /DEF=protease inhibitor (predicted)
1771228_at	-0.3625	0.388334	-2.1041	0.0465698	S. pombe SPAC23C11.06c /DEF=hypothetical protein
1776960_at	-0.215932	0.384026	-0.0412986	0.0184654	S. pombe SPAC19D5.01 /GEN=pyp2 /DEF=serinethreonine protein phosphatase
1772311_at	-0.192511	0.257048	-0.613926	0.0140753	S. pombe SPCC4F11.02 /GEN=ptc1 /DEF=serinethreonine protein phosphatase
1770283_at	-0.0994418	0.145189	0.0171601	0.219685	S. pombe SPAC23D3.05c /DEF=alcohol dehydrogenase pseudogene
1777296_at	-0.506239	0.227548	-0.9838	0.244777	S. pombe SPAC4A8.04 /GEN=isp6 /DEF=serine protease
1778616_at	-0.0530268	-0.00321865	-0.295718	0.0124302	S. pombe SPBC29B5.01 /GEN=atf1 /DEF=transcription factor (PMID 8557039)
1772040_at	-0.41744	-0.199528	0.319105	0.622978	S. pombe SPBC23G7.11 /DEF=DNA-3-methyladenine glycosidase
1769391_at	-0.342008	0.0613178	-0.701354	0.219542	S. pombe SPBC106.10 /GEN=pka1 /DEF=cAMP-dependent protein kinase (catalytic subunit) (PMID 8144551)
1770186_at	-0.0232458	0.0419753	-0.186536	-0.0257874	S. pombe SPBC1539.04 /DEF=hypothetical protein
1771043_at	-0.495146	0.422384	-1.01494	0.0511875	S. pombe SPAC22H12.01c /DEF=hypothetical protein
1771968_at	-0.546086	0.136761	-1.24593	0.461488	S. pombe SPAC167.06c /DEF=hypothetical protein
1779868_at	0.0962473	0.0984274	0.0444803	-0.299408	S. pombe SPAC25H1.02 /GEN=jmj1 /DEF=transcription factor
1769739_at	0.0942577	0.00256252	0.521166	-0.297274	S. pombe SPAC27D7.11c /DEF=possibly S. pombe specific
1772886_at	-0.0624968	0.0626872	-0.325552	0.024004	S. pombe SPAC10F6.06 /GEN=vip1 /DEF=rrm RNA recognition motif
1772634_at	0.00482559	0.787249	-0.934747	-0.0213197	S. pombe SPCP31B10.06 /DEF=C2 domain
1778411_at	0.326971	0.878234	-1.03696	-0.0329599	S. pombe SPAC22F8.05 /DEF=alpha,alpha-trehalose-phosphate synthase (predicted)
1772415_at	-0.0348272	0.121116	-0.543653	-0.0159356	S. pombe SPAP8A3.04c /GEN=hsp9 /DEF=heat shock protein (PMID 8679693)
1777031_at	-0.0621812	0.2355	-0.943561	0.0293074	S. pombe SPBC428.10 /DEF=sequence orphan
1779273_at	-0.103911	0.0825974	-0.51992	-0.0214729	S. pombe SPBC32F12.03c /GEN=gpx1 /DEF=glutathione peroxidase (PMID 10455235)
1777880_at	-0.0637013	0.0166095	-0.0757329	0.0150684	S. pombe SPCC576.03c /DEF=thioredoxin peroxidase
1771560_at	0.13691	0.0310389	-0.698104	0.0703999	S. pombe SPAC8C9.03 /GEN=cgs1 /DEF=cAMP-dependent protein kinase (regulatory subunit)
1777684_at	-0.100481	0.522649	-0.263002	-0.0257724	S. pombe SPBC3H7.02 /DEF=sulfate transporter activity (predicted)
1779258_at	-0.0647214	0.164678	-0.609342	0.131825	S. pombe SPAC21E11.03c /GEN=pcr1 /DEF=transcription factor (PMID 8557039)
1772818_at	0.96944	2.31146	-0.373684	-0.0605996	S. pombe SPACUNK4.17 /DEF=dehydrogenase (predicted)
1777848_at	-0.2835	0.381887	-0.832158	0.00359503	S. pombe SPBC2D10.05 /GEN=exg3 /DEF=glucan 1,3-beta-glucosidase
1772160_at	-0.302558	0.160712	-1.04886	0.146681	S. pombe SPAC688.04c /GEN=gst3 /DEF=glutathione S-transferase (PMID 12151111)
1773294_at	-0.264489	0.316003	-0.98237	0.00627359	S. pombe SPBC660.07 /GEN=ntp1 /DEF=O-glycosyl hydrolase
1777398_at	0.802835	1.0052	-0.550089	-0.857606	S. pombe SPAC343.12 /GEN=rds1 /DEF=involved in response to stress
1778513_at	0.329785	-0.0799115	0.141879	-0.000339508	S. pombe SPBC1105.13c /DEF=hypothetical protein
1778379_at	-0.168343	0.563315	-0.15199	0.214192	S. pombe SPAC11D3.01c /DEF=conserved fungal protein
1776548_at	-1.20839	-0.792187	1.03293	2.68405	S. pombe SPBC23G7.10c /DEF=NADH-dependent flavin oxidoreductase (predicted)
1774099_at	-0.328552	0.263136	-0.408947	0.257178	S. pombe SPCC306.08c /DEF=malate dehydrogenase (predicted)
1770585_at	0.0914316	0.194653	-0.267787	0.119977	S. pombe SPCC1322.08 /GEN=srk1 /DEF=MAPK-activated protein kinase
1778628_at	0.464518	0.728372	-0.0446323	-0.424576	S. pombe SPCC1223.03c /GEN=gut2 /DEF=glycerol-3-phosphate dehydrogenase
1777179_at	-0.237761	0.384552	-0.974559	0.0427586	S. pombe SPCC757.07c /GEN=ctt1 /DEF=catalase

## Sheet: CESR_DN
Probe Set ID	[set3D, DMSO]	[set3D, LatA]	[Wild Type, DMSO]	[Wild type, LatA]	Target Description
1772309_at	0.315141	-0.181866	0.726844	-0.318813	S. pombe SPBC2G2.08 /GEN=ade9 /DEF=C-1-tetrahydrofolate synthase (predicted)
1773095_at	0.288328	-0.11234	0.653143	-0.154084	S. pombe SPAC8F11.04 /DEF=hypothetical protein
1776207_at	0.0985718	-0.124965	0.302789	-0.0481103	S. pombe SPBC25B2.09c /DEF=arginine-tRNA ligase
1771555_at	0.284575	-0.095602	0.80651	-0.216433	S. pombe SPBC9B6.07 /DEF=involved in rRNA processing (predicted)
1769704_at	0.109394	-0.0538877	0.652403	-0.0847302	S. pombe SPAC56F8.09 /DEF=methyltransferase activity (predicted)
1776190_at	0.0237427	-0.203382	0.0981461	0.091101	S. pombe SPBC1198.02 /GEN=dea2 /DEF=adenine deaminase (PMID 14643670)
1773957_at	0.262191	-0.167422	0.539936	-0.4123	S. pombe SPBC106.14c /DEF=involved in actin cytoskeletal organization (regulation) (predicted)
1775979_at	0.206787	-0.178498	0.758194	-0.0566403	S. pombe SPCC126.03 /GEN=lps1 /DEF=tRNA pseudouridylate synthase
1780189_at	0.135637	-0.144205	0.485554	-0.223421	S. pombe SPBC16E9.10c /DEF=AAA family ATPase
1773951_at	0.549056	-0.318131	1.09288	-0.46264	S. pombe SPBC17D1.06 /DEF=DEADDEAH box helicase
1777419_at	0.173304	-0.112433	0.644717	-0.29116	S. pombe SPAC1B9.03c /DEF=RNA-binding protein
1774498_at	0.156363	-0.0628125	0.354524	-0.222707	S. pombe SPBC11G11.03 /DEF=60S acidic ribosomal protein (predicted)
1769589_at	0.206775	-0.13063	0.525075	-0.308609	S. pombe SPAC2F3.03c /GEN=rpa49 /DEF=localization DNA-directed RNA polymerase I complex (subunit)
1770504_at	0.0619542	-0.187915	0.302507	-0.00787067	S. pombe SPCC1223.14 /DEF=chorismate synthase (predicted)
1771665_at	0.0794506	0.0119499	0.41598	-0.102065	S. pombe SPCC965.13 /DEF=transporter
1772332_at	0.106459	-0.0677366	0.176354	-0.288393	S. pombe SPAC10F6.03c /DEF=CTP synthase (predicted)
1770830_at	0.213135	-0.216305	0.724291	-0.158468	S. pombe SPCC290.02 /GEN=rpc34 /DEF=localization DNA-directed RNA polymerase III complex (subunit)
1778559_at	0.346215	-0.194559	0.712417	-0.323176	S. pombe SPBC1711.07 /DEF=WD repeat protein
1775543_at	0.220701	-0.168251	0.695126	-0.104786	S. pombe SPAC23C4.17 /DEF=tRNA methyltransferase (predicted)
1769989_at	0.233024	-0.110115	0.742408	-0.240251	S. pombe SPBC83.15 /DEF=WD repeat protein
1779901_at	-0.0298704	-0.163317	0.297493	0.137569	S. pombe SPAPB1A10.14 /DEF=F-box protein (context dependent)
1772842_at	-0.0390511	-0.196855	0.157649	0.0134665	S. pombe SPAC23H4.06 /GEN=gln1 /DEF=glutamate-ammonia ligase (glutamine synthetase) (PMID 7773104)
1776684_at	0.24567	-0.0646105	0.452138	-0.265686	S. pombe SPBC16C6.12c /DEF=involved in cellular morphogenesis (predicted)
1777432_at	0.210856	-0.118747	0.364827	-0.307855	S. pombe SPBC20F10.01 /GEN=gar1 /DEF=ribonucleoprotein (RNP) complex (PMID 8502556)
1774250_at	0.180023	-0.102458	0.55176	-0.209056	S. pombe SPCC613.08 /DEF=cdk inhibitor (predicted)
1771759_at	0.169618	-0.153316	0.509406	-0.373628	S. pombe SPBC25B2.05 /GEN=mis3 /DEF=RNA-binding protein
1772211_at	0.393356	-0.208367	0.826142	-0.273665	S. pombe SPBC23E6.05 /DEF=metallopeptidase
1771284_at	0.160468	-0.0807997	0.51086	-0.138326	S. pombe SPBC776.08c /DEF=Nrap
1777806_at	0.333146	-0.0682487	0.782166	-0.254673	S. pombe SPBC32H8.05 /DEF=conserved fungal protein
1779180_at	0.213608	-0.178253	0.422482	-0.507263	S. pombe SPBC839.07 /GEN=ibp1 /DEF=rhodanese-like domain
1772775_at	0.244747	-0.166299	0.476033	-0.436474	S. pombe SPBP8B7.16c /GEN=dbp2 /DEF=DEADDEAH box helicase
1779686_at	0.0982698	0.00398827	0.239082	-0.167782	S. pombe SPBC1683.01 /DEF=inorganic phosphate transporter (predicted)
1775115_at	0.296454	-0.122875	0.719754	-0.0857588	S. pombe SPAC30C2.02 /GEN=mmd1 /DEF=HEAT repeat
1776559_at	0.0755692	-0.0807629	0.143578	-0.0965315	S. pombe SPAC1002.13c /GEN=psu1 /DEF=beta-glucosidase (predicted)
1771300_at	-2.12692	-2.73436	2.48923	2.84896	S. pombe SPAC513.03 /GEN=mfm2 /DEF=M-factor precursor (PMID 8196631)
1772993_at	0.0532417	-0.060311	0.356959	0.0230773	S. pombe SPCC24B10.11c /DEF=sequence orphan
1770757_at	0.269334	-0.147045	0.615745	-0.453302	S. pombe SPBC19F5.05c /GEN=ppp1 /DEF=localization nucleolus (predicted)
1774030_at	0.432922	-0.477951	1.35265	-0.204551	S. pombe SPCC297.04c /DEF=SET domain
1778341_at	0.202359	-0.133969	0.571659	-0.243969	S. pombe SPBP8B7.20c /DEF=methyltransferase (predicted)
1779752_at	0.164978	-0.0530828	0.561048	-0.300938	S. pombe SPBC29A3.06 /DEF=WD repeat protein
1774336_at	-0.170689	0.287692	-0.0527458	-0.665462	S. pombe SPBC947.04 /DEF=glycoprotein (predicted)
1773130_at	0.207569	-0.095616	0.526189	-0.302227	S. pombe SPAC23H4.15 /DEF=involved in RNA processing (predicted)
1773410_at	0.0583601	-0.576886	0.431019	-0.0349967	S. pombe SPAC23D3.12 /DEF=inorganic phosphate transporter (predicted)
1774996_at	-0.0313009	0.0563078	0.117795	-0.209787	S. pombe SPBC3B8.05 /DEF=conserved eukaryotic protein
1774417_at	0.124237	-0.0109364	0.386392	-0.281731	S. pombe SPCC18.12c /DEF=conserved eukaryotic protein
1774701_at	-0.0762885	-0.0948137	0.0454098	0.0976334	S. pombe SPBC36.03c /DEF=unknown specificity
1778894_at	0.167015	-0.164173	0.541991	-0.356867	S. pombe SPAC890.05 /DEF=G-patch domain
1775567_at	0.262338	-1.06355	0.305021	-0.542069	S. pombe SPAC821.09 /GEN=eng1 /DEF=glycosyl hydrolase family 81
1772455_at	0.309202	-0.0957178	0.816006	-0.237957	S. pombe SPAC1486.09 /DEF=26S proteasome binding (predicted)
1774731_at	0.162749	0.302196	-0.320251	-0.181731	S. pombe SPBC29B5.02c /GEN=isp4 /DEF=involved in sexual differentiation (PMID 7954893)
1777709_at	0.145142	-0.108637	0.217525	-0.0104154	S. pombe SPBC23E6.09 /DEF=TPR repeat protein
1770100_at	0.295872	-0.315582	0.976885	-0.141783	S. pombe SPAC683.02c /DEF=zinc finger protein
1770199_at	0.13026	-0.12434	0.441845	-0.225944	S. pombe SPAC2G11.11c /GEN=prh1 /DEF=RNA helicase (PMID 1454545)
1772144_at	-0.025534	-0.226031	0.56727	0.0345141	S. pombe SPBC36.01c /DEF=unknown specificity
1778419_at	0.230865	-0.0828574	0.463883	-0.186519	S. pombe SPAC57A10.12c /GEN=ura3 /DEF=dihydroorotate dehydrogenase
1773915_at	0.13584	-0.0896638	0.342682	-0.255395	S. pombe SPBC14F5.03c /GEN=kap123 /DEF=karyopherin
1779700_at	0.603081	-0.486706	1.04891	-1.03426	S. pombe SPBC887.17 /DEF=uracil permease (predicted)
1771604_at	0.441917	0.348617	-0.441702	-1.00115	S. pombe SPBC1861.02 /GEN=abp2 /DEF=ARS binding protein (PMID 9488484)
1776451_at	0.228985	-0.0467049	0.522589	-0.134381	S. pombe SPAC23A1.03 /GEN=apt1 /DEF=adenine phosphoribosyltransferase (APRT) (predicted)
1771994_at	0.385607	-0.157711	0.828831	-0.265306	S. pombe SPBC29A3.16 /DEF=involved in ribosome biogenesis and assembly (regulation) (predicted)
1778036_at	0.103294	-0.079196	0.167489	-0.203626	S. pombe SPBC14F5.06 /DEF=iron-sulfur protein
1778175_at	0.181053	-0.0974134	0.729219	-0.114893	S. pombe SPAC19A8.07c /DEF=ribonucleoprotein (RNP) complex (predicted) (PMID 12068309)
1772450_at	0.281984	-0.219657	0.861086	-0.0844406	S. pombe SPBC215.06c /DEF=transcription factor (predicted)
1773651_at	0.146455	-0.0587536	0.326171	-0.304776	S. pombe SPCC1183.07 /DEF=RNA-binding protein
1773532_at	0.0570186	-0.431133	0.43386	-0.0485665	S. pombe SPBPB7E8.01 /DEF=glycoprotein (predicted)
1771721_at	0.215935	-0.140228	0.540504	-0.11049	S. pombe SPBC776.17 /DEF=involved in rRNA processing (predicted)
1776648_at	0.00890668	0.12584	-0.242698	-0.0211166	S. pombe SPAC2F7.11 /GEN=nrd1 /DEF=rrm RNA recognition motif
1770568_at	0.312182	-0.187909	0.707422	-0.312009	S. pombe SPCC320.11c /DEF=involved in ribosome biogenesis and assembly (predicted)
1776758_at	-0.4629	0.107447	-0.0236053	0.197576	S. pombe SPAC13G7.13c /DEF=involved in sporulation (predicted)
1770293_at	-0.112412	-0.0137672	0.0487293	0.126805	S. pombe SPBC2F12.02c /GEN=mrpl7 /DEF=mitochondrial ribosomal protein subunit YmL5YmL7
1770494_at	0.362426	-0.188353	0.630081	-0.447661	S. pombe SPAC1F7.02c /DEF=DEADDEAH box helicase
1779997_at	0.383336	-0.219677	0.83892	-0.414354	S. pombe SPBC16D10.01c /DEF=TPR repeat protein
1770986_at	-0.00502555	-0.00191053	-0.0593001	0.0471443	S. pombe SPBC8D2.18c /DEF=adenosylhomocysteinase (predicted)
1780245_at	0.21931	-0.178764	0.510633	-0.429769	S. pombe SPAC222.06 /DEF=nuclear HMG-like acidic protein
1778924_at	0.860764	-0.00490316	0.627689	-0.0455783	S. pombe SPAC6G10.12c /GEN=ace2 /DEF=transcrption factor
1770439_at	0.0978937	-0.0354176	0.326604	-0.0400664	S. pombe SPBC14F5.09c /GEN=ade8 /DEF=adenylosuccinate lyase
1773701_at	0.204899	-0.116338	0.457925	-0.254684	S. pombe SPAC17H9.04c /DEF=RNA-binding protein
1772191_at	0.360671	-0.380896	0.794862	-0.0976884	S. pombe SPAC8E11.10 /GEN=sou1 /DEF=short chain dehydrogenase
1777597_at	0.154697	-0.0797234	0.298098	-0.0972083	S. pombe SPBC1778.01c /DEF=zuotin-like protein
1770807_at	0.00645542	-0.032656	0.356044	-0.0350434	S. pombe SPCC584.13 /DEF=amino acid permease family
1776545_at	0.451411	-0.206267	0.860809	-0.304189	S. pombe SPBC1347.02 /GEN=fkbp39 /DEF=peptidyl-prolyl cis-trans isomerase
1773155_at	0.235824	-0.187234	0.383019	-0.398287	S. pombe SPCP1E11.11 /DEF=RNA-binding protein
1776966_at	0.216615	-0.141796	0.892687	-0.267282	S. pombe SPAC19B12.01 /DEF=TPR repeat protein
1773856_at	0.0931485	-0.0313174	0.665482	-0.05598	S. pombe SPCC1827.01c /DEF=conserved eukaryotic protein
1773789_at	0.273159	-0.103575	0.675448	-0.340902	S. pombe SPAC20G8.09c /DEF=conserved protein
1774465_at	0.37971	-0.821095	0.381129	-0.421295	S. pombe SPAC14C4.09 /GEN=agn1 /DEF=alpha glucanase (predicted) (pers. comm. Yolanda Sanchez Martin)
1771322_at	0.0336657	-0.00758521	0.0200062	-0.0920226	S. pombe SPCC1450.04 /GEN=tef5 /DEF=translation elongation factor 1 (beta subunit) (PMID 9099890)
1776005_at	0.278044	-1.49675	-0.0607007	0.130827	S. pombe SPAC27D7.03c /GEN=mei2 /DEF=RNA-binding protein
1772767_at	0.408322	-0.229269	0.58777	-0.502697	S. pombe SPAC22E12.13c /GEN=rpl2403 /DEF=60S ribosomal protein L24-3 (L30)
1779138_at	0.15516	-0.157116	0.351727	-0.0896549	S. pombe SPAC6G9.10c /GEN=sen1 /DEF=DNA2NAM7 family
1779937_at	-0.086682	0.0163027	0.0257524	0.0145547	S. pombe SPBC21C3.08c /DEF=ornithine aminotransferase
1776382_at	0.232833	-0.0882635	0.613684	-0.229673	S. pombe SPBC1734.01c /DEF=conserved eukaryotic protein
1771166_at	0.289708	-0.111374	0.678925	-0.412935	S. pombe SPBC4F6.14 /DEF=RNA-binding protein
1775326_at	0.275001	-0.72463	0.424981	-0.157125	S. pombe SPBC8E4.01c /DEF=inorganic phosphate transporter (predicted)
1773080_at	0.291555	-0.131039	0.91016	-0.202906	S. pombe SPAC823.08c /DEF=RNA helicase (predicted)
1776586_at	0.301449	-0.18419	0.616123	-0.40587	S. pombe SPAC1142.04 /DEF=UPF0120
1779598_at	0.130942	-0.0767536	0.0705045	-0.163284	S. pombe SPBP23A10.11c /DEF=predicted N-terminal signal sequence
1774760_at	0.277267	-0.0863015	0.720028	-0.229456	S. pombe SPAC6G9.02c /DEF=RNA-binding protein
1775879_at	0.356492	-0.145103	0.671671	-0.193288	S. pombe SPCC330.07c /DEF=transporter
1774397_at	0.435471	-0.301788	0.894448	-0.293674	S. pombe SPBC428.03c /GEN=pho4 /DEF=acid phosphatase activity
1770251_at	0.167658	-0.0497249	0.716686	-0.105713	S. pombe SPAC18B11.06 /DEF=U3 snoRNP component (predicted)
1770982_at	0.233217	-0.0740766	0.476723	-0.264963	S. pombe SPBC800.06 /DEF=conserved eukaryotic protein
1774131_at	0.073609	-0.181834	0.606775	-0.0608196	S. pombe SPBC8D2.10c /DEF=zinc finger protein (inferred from context)
1776991_at	0.441139	-0.343172	0.711172	-0.513766	S. pombe SPAC926.08c /DEF=RNA-binding protein

## Sheet: Cytokinesis
Probe Set ID	[set3D, DMSO]	[set3D, LatA]	[Wild Type, DMSO]	[Wild type, LatA]	Target Description
1774302_at	0.0269677	-0.0876958	-0.0115458	-0.312652	S. pombe SPAC1782.09c /GEN=clp1 /DEF=Cdc14-related protein phosphatase
1778572_at	-0.0700537	0.0449613	-0.149624	0.120084	S. pombe SPAC1093.06c /GEN=dhc1 /DEF=dynein heavy chain (PMID 10855500)
1774210_at	0.0676003	-0.0654936	-0.0247634	-0.040486	S. pombe SPAC3F10.15c /GEN=spo12 /DEF=involved in sporulation (predicted)
1776971_at	0.130584	0.168157	-0.21455	-0.30164	S. pombe SPAC57A10.02 /GEN=cdr2 /DEF=serinethreonine protein kinase
1776696_at	-0.0518322	0.105792	-0.173769	0.0247339	S. pombe SPBC3B9.02c /GEN=cwf28 /DEF=G-patch domain
1769744_at	-0.0715119	0.174951	-0.0131928	-0.0580556	S. pombe SPAC9G1.06c /GEN=cyk3 /DEF=src (SH3) homology domain
1769425_at	0.119795	0.0590782	0.0126705	-0.0587311	S. pombe SPAC19E9.02 /GEN=fin1 /DEF=serinethreonine protein kinase
1769458_at	-0.0720437	-0.0706768	-0.0192286	0.094595	S. pombe SPBC27.02c /DEF=DASH complex (predicted)
1779828_at	-0.137302	0.182114	-0.252749	0.306983	S. pombe SPAC1D4.11c /GEN=lkh1 /DEF=dual specificity protein kinase
1778136_at	0.13344	-0.0590423	-0.0423358	-0.135729	S. pombe SPCC4B3.15 /GEN=dmf1 /DEF=involved in cytokinesis (required)
1770881_at	-0.00377305	0.0716	-0.014581	-0.145003	S. pombe SPBC800.05c /GEN=tub1 /DEF=tubulin (alpha 2)
1777167_at	0.045564	0.315253	-0.192028	-0.0760956	S. pombe SPBC1718.07c /GEN=zfs1 /DEF=zinc finger protein
1773368_at	0.268013	-0.108285	1.00491	-0.036719	S. pombe SPCC16C4.08c /GEN=skb15 /DEF=interacts physically with Shk1p (PMID 11389855)
1776236_at	-0.0829452	0.266912	-0.397889	0.0762218	S. pombe SPAC24H6.09 /GEN=gef1 /DEF=RhoGEF
1777755_at	-0.0407565	0.0415379	-0.0611585	0.0362062	S. pombe SPAC12G12.15 /GEN=sif3 /DEF=localization spindle pole body (associated with) (pers. comm. Osami Niwa)
1778436_at	0.164158	-0.142214	0.0924254	-0.210787	S. pombe SPAC3C7.12 /GEN=noc1 /DEF=microtubule-associated protein (PMID 11007487)
1773403_at	0.0652253	-0.0561943	0.174376	-0.0176271	S. pombe SPBC12D12.03 /GEN=cct1 /DEF=chaperonin-containing T-complex
1778301_at	-0.0158669	0.0625073	-0.0666246	0.0265532	S. pombe SPAC4A8.15c /GEN=cdc3 /DEF=profilin
1775288_at	-0.111765	0.0524635	-0.0275749	0.0842851	S. pombe SPAC821.06 /GEN=spn2 /DEF=septin (predicted)
1769893_at	0.0454874	-0.11495	-0.462446	0.0954456	S. pombe SPAC4A8.05c /GEN=myp2 /DEF=myosin (type II) (heavy chain) (PMID 9398685)
1770875_at	0.0377766	0.111158	-0.0380274	-0.115176	S. pombe SPACUNK4.07c /GEN=cta4 /DEF=P-type ATPase (PMID 12707717)
1772575_at	0.019509	-0.0231632	-0.13931	0.0703379	S. pombe SPAC15A10.03c /GEN=rhp54 /DEF=DEADDEAH box helicase
1779067_at	0.238288	-0.326747	0.0892712	-0.0492671	S. pombe SPAC8E11.07c /GEN=alp31 /DEF=chaperone activity
1770359_at	0.0895014	-0.340221	0.182179	-0.0561736	S. pombe SPCC188.04c /DEF=involved in intracellular protein transport (predicted)
1774611_at	0.0817808	-0.065347	0.0195074	-0.0425091	S. pombe SPAC3H8.10 /GEN=spo20 /DEF=CRALTRIO domain
1772667_at	0.0803331	-0.161632	0.0747852	-0.0880953	S. pombe SPBC337.14 /GEN=rpb4 /DEF=DNA-directed RNA polymerase (II subunit)
1776976_at	-0.0778313	0.255713	-0.116636	-0.0216627	S. pombe SPBC2F12.13 /GEN=klp5 /DEF=kinesin-like protein
1777636_at	0.00871754	-0.203202	-0.444428	0.50855	S. pombe SPCC417.06c /DEF=serinethreonine protein kinase (predicted)
1770327_at	-0.0193087	0.0229594	0.0845683	-0.129297	S. pombe SPAC1F3.06c /GEN=spo15 /DEF=involved in sporulation (required)
1775559_at	-0.0637693	0.199163	-0.263018	0.0179771	S. pombe SPBC4C3.12 /GEN=sep1 /DEF=fork head domain
1773396_at	0.00557804	-0.371214	-0.0153742	0.114119	S. pombe SPBPJ4664.02 /DEF=glycoprotein (predicted)
1775061_at	0.586025	0.00744311	0.514623	-0.145155	S. pombe SPAC821.08c /GEN=slp1 /DEF=WD repeat protein
1779909_at	-0.0332422	0.0273596	-0.0734828	0.134891	S. pombe SPAPB1A10.10c /GEN=ypt71 /DEF=GTPase
1773516_at	-0.119036	-0.0371272	0.096536	0.0455281	S. pombe SPBC24C6.07 /GEN=cdc14 /DEF=SIN component
1779903_at	0.309127	-0.619301	0.0380096	-0.0550747	S. pombe SPAC144.14 /GEN=klp8 /DEF=kinesin-like protein
1775406_at	-0.0169665	0.194415	-0.0371695	-0.0826763	S. pombe SPBC1921.03c /GEN=mex67 /DEF=Tap homolog
1769680_at	0.199125	-0.0457048	0.486357	-0.311357	S. pombe SPAC890.04c /DEF=WD repeat protein
1770254_at	-0.099371	0.158052	0.0281003	0.0383209	S. pombe SPBC21.06c /GEN=cdc7 /DEF=serinethreonine protein kinase
1778239_at	0.36906	-0.684628	0.524054	-0.938783	S. pombe SPBPB10D8.02c /DEF=arylsulfatase (predicted)
1777127_at	0.0566918	-0.0349353	0.0493574	-0.0577141	S. pombe SPAC4F8.13c /GEN=rng2 /DEF=IQGAP
1770386_at	-0.119134	-0.108399	0.283636	0.0705675	S. pombe SPAC2G11.15c /DEF=RNA methyltransferase activity (predicted)
1771370_at	0.114272	0.0342846	-0.0522315	0.00063769	S. pombe SPAC1F5.04c /GEN=cdc12 /DEF=formin
1779013_at	-0.0497414	0.0288881	0.00358454	-0.00499312	S. pombe SPCC1235.10c /GEN=sec6 /DEF=localization exocyst (predicted)
1777586_at	-0.00580947	0.0838127	-0.0400864	0.00361729	S. pombe SPAPJ696.02 /DEF=actin cortical patch component (predicted) (PMID 12388763)
1771669_at	0.0162722	0.0194445	-0.206678	0.00296879	S. pombe SPBC365.15 /GEN=alp4 /DEF=gamma tubulin complex
1771420_at	-0.000984828	0.197288	-0.15861	-0.027317	S. pombe SPBP4H10.04 /GEN=ppb1 /DEF=serinethreonine protein phosphatase (catalytic subunit)
1779966_at	-0.0124451	0.158022	-0.192745	-0.109041	S. pombe SPCC736.14 /GEN=dis1 /DEF=microtubule-associated protein (PMID 7628693)
1775841_at	0.233854	-0.125745	0.403369	-0.271516	S. pombe SPBC18H10.04c /GEN=sce3 /DEF=translation initiation factor
1777073_at	0.0307175	0.0383552	0.0175365	-0.0206833	S. pombe SPBC16A3.01 /GEN=spn3 /DEF=septin (predicted)
1774013_at	-0.0743583	-0.096	0.0784626	0.0693947	S. pombe SPAC17H9.09c /GEN=ras1 /DEF=GTPase
1778489_at	0.0621157	0.0196505	-0.121082	-0.00478872	S. pombe SPBC146.13c /GEN=myo1 /DEF=myosin (type I)
1774735_at	-0.0178595	0.398767	-0.168106	0.089845	S. pombe SPBC887.09c /DEF=leucine-rich repeat protein
1769605_at	-0.0261148	0.0269213	-0.115628	0.0182238	S. pombe SPAC8E11.02c /GEN=rad24 /DEF=involved in DNA repair
1772480_at	0.112187	-0.0229893	-0.066253	-0.0492179	S. pombe SPAC1687.15 /GEN=gsk3 /DEF=serinethreonine protein kinase
1779022_at	-0.0178213	-0.0533867	0.0509675	-0.0053126	S. pombe SPBC15D4.10c /DEF=zinc finger protein
1777914_at	0.142766	-0.0253903	0.0411952	-0.226022	S. pombe SPAC22G7.02 /GEN=kap111 /DEF=karyopherin
1771226_at	0.0504627	0.137995	-0.115712	-0.0627343	S. pombe SPCC1393.02c /DEF=hypothetical protein
1775723_at	0.128613	-0.08863	0.110895	-0.138196	S. pombe SPAC29E6.02 /GEN=prp3 /DEF=U4U6 x U5 tri-snRNP complex (predicted)
1774562_at	0.0125812	-0.000957171	0.182747	-0.139901	S. pombe SPCC962.02c /GEN=cut17 /DEF=survivin
1778448_at	-0.092941	-0.0314624	0.00640933	0.0723801	S. pombe SPBC1706.01 /GEN=tea4 /DEF=src (SH3) homology domain
1773991_at	0.334033	-0.919682	0.371977	-0.449658	S. pombe SPCC18.01c /GEN=adg3 /DEF=beta-glucosidase (predicted)
1778438_at	0.0647205	0.0659968	-0.0416282	-0.0508944	S. pombe SPBC3F6.05 /GEN=rga1 /DEF=GTPase activating protein
1775544_at	0.0675217	0.00580215	-0.226828	-0.0266841	S. pombe SPBC800.10c /DEF=actin cortical patch component (predicted)
1771327_at	-0.0291583	0.057572	-0.0497224	-0.051582	S. pombe SPBC106.20 /GEN=exo70 /DEF=localization exocyst (predicted)
1779443_at	0.035251	-0.0615374	0.19159	-0.290529	S. pombe SPBC12D12.01 /GEN=sad1 /DEF=localization spindle pole body (PMID 7744953)
1770670_at	-0.114169	0.169102	-0.205235	0.0860262	S. pombe SPAC6F6.10c /GEN=arc2 /DEF=ARP23 actin-organizing complex
1777406_at	0.0538721	-0.0139701	-0.491034	0.0447537	S. pombe SPAC9G1.10c /DEF=inositol polyphosphate phosphatase (predicted)
1777161_at	0.0476977	0.247224	-0.162128	0.036616	S. pombe SPCC162.07 /DEF=epsin
1780002_at	-0.0797946	0.0741425	-0.115568	0.0550238	S. pombe SPAC6G9.07c /GEN=arc4 /DEF=ARP23 actin-organizing complex
1773723_at	-0.0941327	0.237996	-0.360289	0.0681321	S. pombe SPAC6F6.08c /GEN=cdc16 /DEF=two-component GAP for GTPase spg1
1780182_at	0.0220388	0.0896686	-0.353764	0.0424608	S. pombe SPBC17F3.02 /GEN=nak1 /DEF=N-terminal protein kinase
1773638_at	-0.0285769	-0.0462834	0.03615	-0.0256154	S. pombe SPBC14C8.17c /DEF=WD repeat protein
1776446_at	0.0351769	0.00443331	0.0123596	-0.0298869	S. pombe SPAC23C4.08 /GEN=rho3 /DEF=GTPase
1773223_at	-0.169429	0.222963	-0.218142	0.0651045	S. pombe SPAC9E9.10c /GEN=cbh1 /DEF=centromere binding protein (k-type repeat)
1774544_at	0.00210253	0.361285	-0.144522	-0.0543356	S. pombe SPBC1604.20c /GEN=tea2 /DEF=kinesin-like protein
1777349_at	0.0753183	0.120988	-0.0821177	-0.0497138	S. pombe SPCC188.02 /GEN=par1 /DEF=protein phosphatase regulatory subunit (PMID 10757751)
1775496_at	-0.088357	0.0832942	0.0332623	-0.228167	S. pombe SPAC1834.07 /GEN=klp3 /DEF=kinesin-like protein
1771298_at	0.102985	-0.150922	0.465763	-0.0157925	S. pombe SPBC6B1.04 /GEN=mde4 /DEF=no apparent orthologs
1770004_at	0.00258859	0.0425816	-0.0252876	-0.0339069	S. pombe SPBC11B10.05c /GEN=rsp1 /DEF=DNAJ domain protein
1779424_at	0.0781355	-0.0792214	0.224546	-0.0686992	S. pombe SPAC18G6.07c /GEN=mra1 /DEF=functions downstream of Ras1p
1773384_at	0.136775	-0.00388368	-0.147199	0.0216236	S. pombe SPCC757.12 /DEF=glycosyl hydrolase family 13
1772782_at	0.0319227	0.0906757	-0.319846	-0.0353727	S. pombe SPBC428.13c /GEN=mob1 /DEF=Sid2p-Mob1p kinase complex
1772722_at	0.27792	-0.503987	0.700029	-0.42727	S. pombe SPBC31F10.17c /DEF=sequence orphan
1780251_at	0.079477	-0.0470406	0.400698	-0.133891	S. pombe SPAC1687.10 /DEF=sequence orphan
1778455_at	0.0289145	0.123624	-0.0333036	-0.194961	S. pombe SPCC895.07 /GEN=alp14 /DEF=localization spindle pole body
1771118_at	0.231902	-0.00716495	0.323227	-0.160821	S. pombe SPAC14C4.16 /DEF=sequence orphan
1775155_at	0.077522	-0.2459	0.196263	-0.0639807	S. pombe SPCC1682.04 /GEN=cdc31 /DEF=EF hand
1780162_at	0.0945377	-0.0864744	0.293264	-0.0114047	S. pombe SPBC365.06 /GEN=pmt3 /DEF=ubiquitin family protein
1771225_at	0.00486469	0.079402	-0.0860532	-0.0322418	S. pombe SPCC794.11c /DEF=actin cortical patch component (predicted)
1776213_at	0.0369088	-0.0329405	0.111979	-0.170452	S. pombe SPCC1739.11c /GEN=cdc11 /DEF=SIN component
1770729_at	0.219117	-0.072437	0.498773	-0.238542	S. pombe SPCC1672.07 /DEF=WD repeat protein
1778490_at	0.0484301	0.0155036	-0.137491	0.00693417	S. pombe SPAC1805.08 /GEN=dlc1 /DEF=dynein light chain
1777494_at	0.0565656	-0.133097	-0.158847	0.0183884	S. pombe SPBC4F6.12 /DEF=LIM domain
1769784_at	0.0854692	0.205194	-0.249581	-0.208457	S. pombe SPAC664.10 /DEF=kinesin-like protein
1770537_at	0.101404	0.0232385	-0.158355	-0.0505333	S. pombe SPAC6G9.11 /GEN=syb1 /DEF=synaptobrevin (PMID 12565827)
1777520_at	0.151022	0.156525	-0.0722078	-0.139993	S. pombe SPAC890.02c /GEN=alp7 /DEF=coiled-coil (predicted)
1775604_at	0.103918	-0.0729809	0.322869	-0.261751	S. pombe SPBC1A4.07c /DEF=WD repeat protein
1773407_at	0.0393724	0.0225267	-0.095535	-0.0449622	S. pombe SPCC1840.02c /GEN=bgs4 /DEF=1,3-beta-glucan synthase (subunit) (predicted)
1780050_at	-0.103876	0.146439	-0.183099	0.123576	S. pombe SPAC16E8.09 /GEN=scd1 /DEF=guanyl-nucleotide exchange factor activity
1773038_at	0.576649	-0.0382948	-0.0837472	0.0567315	S. pombe SPBC1709.01 /GEN=chs2 /DEF=chitin synthase family
1774890_at	-0.048069	-0.0503254	0.10295	0.237106	S. pombe SPBC1604.16c /DEF=hypothetical protein
1779069_at	0.00315285	-0.0372766	0.0627069	-0.286369	S. pombe SPBC244.01c /GEN=sid4 /DEF=SIN component (PMID 9649519)
1771946_at	-0.059117	0.0224997	-0.00882276	0.0456416	S. pombe SPAC6G9.06c /GEN=pcp1 /DEF=gamma tubulin complex (associated with) (PMID Venkatram et al in press)
1770901_at	0.324357	-0.299353	0.0402568	-0.123255	S. pombe SPBC27.05 /DEF=sequence orphan
1771654_at	-0.0905504	-0.00603644	-0.0995982	0.268201	S. pombe SPAC16A10.05c /DEF=DASH complex (predicted)
1770703_at	-0.25931	0.153821	-0.452376	-0.00794792	S. pombe SPAC23C11.16 /GEN=plo1 /DEF=serinethreonine protein kinase
1779382_at	-0.0645717	0.196851	-0.263759	0.0787512	S. pombe SPAC23A1.17 /DEF=adaptor protein (PMID 11901111)
1772354_at	0.290941	-1.19526	0.599215	-0.596381	S. pombe SPAC644.05c /DEF=deoxyuridine 5-triphosphate nucleotidohydrolase (predicted)
1773762_at	0.0123088	-0.0691249	0.250188	0.024923	S. pombe SPBC36.12c /GEN=git7 /DEF=involved in cAMP-mediated signaling
1773549_at	-0.194345	0.205269	-0.380896	0.208611	S. pombe SPBC1289.14 /DEF=adducin N-terminal domain protein
1769326_at	0.134981	-0.53266	0.086997	-0.327768	S. pombe SPBC1105.05 /GEN=exg1 /DEF=glucan 1,3-beta-glucosidase III precursor
1771936_at	-0.0179885	0.00282733	0.0522213	-0.0694691	S. pombe SPBC337.05c /GEN=cct8 /DEF=chaperonin-containing T-complex
1773652_at	0.347773	0.039045	-0.0808318	-0.183314	S. pombe SPAC2F7.03c /GEN=pom1 /DEF=serinethreonine protein kinase
1776443_at	-0.025314	0.0259399	-0.0984526	0.0159448	S. pombe SPAP8A3.08 /GEN=cdc4 /DEF=EF hand
1780140_at	-0.139088	0.0943877	-0.246495	-0.0193739	S. pombe SPCC320.13c /GEN=ark1 /DEF=serinethreonine protein kinase
1776677_at	0.0858246	0.0317033	-0.041295	-0.0225143	S. pombe SPBC16E9.01c /DEF=sequence orphan
1779935_at	0.0643142	0.0458574	-0.0112187	-0.170645	S. pombe SPCC1322.02 /DEF=sequence orphan
1773550_at	0.0516742	-0.108553	0.0555785	-0.169691	S. pombe SPBC16A3.15c /GEN=nda2 /DEF=tubulin (alpha 1)
1772866_at	0.241136	-0.364747	0.179046	-0.193137	S. pombe SPCC338.17c /GEN=rad21 /DEF=mitotic cohesin complex (subunit) (PMID 11069892)
1776140_at	-0.0100155	0.0378695	0.0684923	-0.153237	S. pombe SPBC543.07 /GEN=pek1 /DEF=serinethreonine protein kinase
1770602_at	0.351092	-0.353171	0.442682	-0.420798	S. pombe SPAC2E1P5.03 /DEF=DNAJ domain protein
1774205_at	0.0627349	0.12206	-0.242354	-0.0581783	S. pombe SPAC19G12.14 /GEN=its3 /DEF=1-phosphatidylinositol-4-phosphate 5-kinase activity (PMID 10950958)
1778276_at	0.0613241	-0.0663341	0.0319576	-0.0785446	S. pombe SPAC18G6.03 /GEN=ypt3 /DEF=GTPase
1771798_at	-0.0452709	0.173604	-0.26975	-0.0228211	S. pombe SPAC11H11.06 /GEN=arp2 /DEF=ARP23 actin-organizing complex
1773011_at	0.0694733	-0.0658843	0.164109	-0.140427	S. pombe SPAC1D4.04 /GEN=cct2 /DEF=T-complex protein 1 (beta subunit)
1775524_at	0.0783911	-0.00574398	0.161531	-0.114397	S. pombe SPAC3G9.01 /DEF=sequence orphan
1771314_at	0.136376	-0.0579901	0.356405	-0.141041	S. pombe SPAC6F6.03c /DEF=GTP binding protein associated
1779092_at	-0.103056	0.139942	-0.334499	0.0850795	S. pombe SPAC926.03 /GEN=rlc1 /DEF=myosin regulatory light chain (type II) (PMID 11056543)
1777076_at	0.0302051	0.00419617	-0.0937154	0.00454585	S. pombe SPBC1778.06c /GEN=fim1 /DEF=fimbrin
1772867_at	-0.11322	0.194056	-0.484257	0.040199	S. pombe SPCC645.05c /GEN=myo2 /DEF=myosin (type II) (heavy chain)
1776547_at	-0.0300293	-0.0929708	0.136822	-0.130417	S. pombe SPBC13A2.01c /DEF=nuclear cap-binding complex (small subunit)
1778854_at	0.0254943	0.0159798	0.0320082	-0.271569	S. pombe SPBC25B2.07c /DEF=sequence orphan
1777000_at	-0.163157	0.261103	-0.261269	0.141316	S. pombe SPCC126.06 /GEN=twf1 /DEF=twinfilin
1778385_at	0.0102514	-0.183114	0.0224209	0.0377795	S. pombe SPAC4F8.10c /DEF=calponin homology (CH) domain
1769928_at	-0.0401767	0.0337025	0.101797	-0.0883439	S. pombe SPBC11C11.04c /GEN=alp1 /DEF=tubulin specific chaperone (cofactor D)
1772216_at	-0.276271	0.162986	-0.748806	0.309405	S. pombe SPAC19B12.08 /DEF=peptidase family C54
1779226_at	0.230232	0.112839	-0.105967	-0.166944	S. pombe SPCC645.06c /GEN=rgf3 /DEF=localization cell division site (pers. comm. Jian-Qiu Wu and John R. Pringle)
1774319_at	0.0831607	-0.000701904	0.0431846	-0.115117	S. pombe SPAC2F3.15 /DEF=serinethreonine protein kinase (predicted)
1777426_at	-0.0396271	0.115886	-0.268797	-0.0710475	S. pombe SPAC9G1.05 /DEF=WD repeat protein
1769540_at	0.0409492	-0.0398715	0.336803	-0.252715	S. pombe SPBC336.02 /DEF=methylase
1776598_at	-0.0848738	0.0340843	-0.176071	0.153053	S. pombe SPAC29A4.05 /GEN=cam2 /DEF=calmodulin (predicted)
1769930_at	0.0239503	0.135043	-0.0634616	-0.0880868	S. pombe SPBP19A11.04c /GEN=mor2 /DEF=involved in cellular morphogenesis (required) (PMID 12234926)
1776495_at	-0.0242729	-0.199245	0.208395	0.0425339	S. pombe SPBC582.06c /DEF=sequence orphan
1772404_at	0.0861298	0.165318	-0.0233313	-0.117803	S. pombe SPBC1685.15c /GEN=klp6 /DEF=kinesin-like protein
1780158_at	-0.167654	0.0365966	-0.0547291	0.108428	S. pombe SPAC3A11.14c /GEN=pkl1 /DEF=kinesin-like protein
1770955_at	0.0150105	0.00202592	0.0808544	-0.0912018	S. pombe SPAC6G10.02c /GEN=tea3 /DEF=kelch repeat protein
1777281_at	-0.0758524	0.0459143	0.104456	-0.161323	S. pombe SPBC21C3.07c /DEF=methyltransferase (predicted)
1775034_at	0.136934	-0.0890455	0.247865	-0.2668	S. pombe SPBC31E1.06 /DEF=GTP binding
1778482_at	0.335076	-1.44095	0.421422	-0.487206	S. pombe SPAPJ760.03c /GEN=adg1 /DEF=glycoprotein (predicted)
1773238_at	0.213548	-0.074447	0.0857201	-0.0769628	S. pombe SPAC20G8.05c /GEN=cdc15 /DEF=phosphoprotein
1776743_at	0.00937239	-0.0901985	0.127169	-0.144133	S. pombe SPBC32F12.04 /GEN=tug1 /DEF=tubulin (gamma)
1776579_at	0.391784	-0.486961	-0.00232379	-0.0922337	S. pombe SPBC1709.12 /DEF=sequence orphan
1769590_at	-0.0497929	0.0514088	-0.0567153	-0.0042553	S. pombe SPAC4F10.11 /GEN=spn1 /DEF=septin
1774557_at	-0.0576057	0.25531	-0.0914062	0.0781803	S. pombe SPAC688.11 /DEF=actin cortical patch component (predicted)
1774164_at	-0.0588223	0.153724	-0.296488	0.144441	S. pombe SPAC4F10.15c /GEN=wsp1 /DEF=Wiskott-Aldrich homolog
1776369_at	-0.195409	0.0714083	-0.409016	0.19764	S. pombe SPAC589.08c /DEF=DASH complex (predicted)
1778721_at	-0.00751273	-0.00320752	-0.258173	0.0365855	S. pombe SPCC1322.10 /DEF=glycoprotein (predicted)
1779704_at	0.262756	-0.0974255	0.620824	-0.297518	S. pombe SPBC19F5.02c /DEF=WD repeat protein
1775488_at	0.018247	-0.0361061	0.0308615	-0.0349299	S. pombe SPAC14C4.02c /GEN=spr18 /DEF=SMC family (PMID 10747036)
1772695_at	0.101267	0.0998913	0.040528	-0.00852776	S. pombe SPAC16A10.04 /GEN=rho4 /DEF=GTPase
1775567_at	0.262338	-1.06355	0.305021	-0.542069	S. pombe SPAC821.09 /GEN=eng1 /DEF=glycosyl hydrolase family 81
1771033_at	-0.018411	0.0795422	-0.20526	-0.0548105	S. pombe SPBC106.01 /GEN=mph1 /DEF=Mps1-like family (PMID 9601094)
1777026_at	-0.0857016	0.189836	-0.30423	0.0400677	S. pombe SPAC3A12.14 /GEN=cam1 /DEF=calmodulin (PMID 3035538)
1778060_at	0.0954828	0.271133	-0.00978692	-0.191782	S. pombe SPAC806.08c /DEF=sequence orphan
1779960_at	-0.0976226	0.173776	-0.304961	-0.00411129	S. pombe SPBC12C2.05c /DEF=DAG domain
1779173_at	0.0162417	0.0349302	-0.0882289	-0.00752481	S. pombe SPAC2F7.07c /DEF=zinc finger protein
1773025_at	0.0825761	0.0328401	-0.364779	0.0620724	S. pombe SPBC19F8.03c /DEF=ENTH domain protein
1769817_at	-0.0747051	0.00439994	-0.000148137	0.112115	S. pombe SPAC631.01c /DEF=F-actin capping protein (beta subunit) (predicted)
1776924_at	0.160642	-0.119102	0.151988	-0.145067	S. pombe SPBC902.06 /DEF=hypothetical protein
1771783_at	-0.139445	-0.271707	0.00734456	0.391486	S. pombe SPBC216.02 /DEF=coiled-coil (region) (predicted)
1775360_at	0.16687	-0.132943	0.3487	-0.191638	S. pombe SPBC30D10.11 /GEN=gpi1 /DEF=N-acetylglucosaminyl transferase component (predicted)
1774191_at	-0.1219	0.317275	-0.23065	0.176621	S. pombe SPAC1687.09 /DEF=conserved fungal protein
1772851_at	-0.149817	0.563759	-0.443438	0.0764147	S. pombe SPAPJ760.02c /GEN=app1 /DEF=actin-binding protein
1774730_at	-0.050135	0.207206	-0.0699797	-0.032143	S. pombe SPAC222.10c /GEN=byr4 /DEF=two-component GAP for GTPase spg1 (PMID 9742395)
1773237_at	0.0571391	0.000789007	0.0262397	-0.133819	S. pombe SPBC1A4.08c /GEN=cct3 /DEF=chaperonin-containing T-complex
1772096_at	-0.137035	0.198982	-0.206224	0.188891	S. pombe SPBC409.05 /GEN=skp1 /DEF=SCF ubiquitin ligase complex (PMID 9990507)
1780204_at	0.237281	-0.117241	0.226528	-0.137316	S. pombe SPBC31E1.02c /GEN=pmr1 /DEF=ATPase (PMID 12707717)
1770870_at	0.106867	0.0522947	-0.286647	-0.185643	S. pombe SPAC13G7.04c /GEN=mac1 /DEF=membrane anchored protein (PMID 12206652)
1776765_at	0.0606381	-0.0362918	0.179754	-0.055939	S. pombe SPBC1215.02c /DEF=N-acetyltransferase complex (non catalytic subunit)
1776374_at	0.0751855	-0.0430867	-0.139431	-0.0107883	S. pombe SPBC651.11c /GEN=apm2 /DEF=AP adaptor complex (predicted)
1777743_at	0.0434869	-0.0321967	0.110081	-0.12224	S. pombe SPBC2D10.10c /GEN=fib1 /DEF=fibrillarin
1769572_at	0.036574	0.0730756	-0.25753	-0.0539233	S. pombe SPAC1006.06 /GEN=rgf2 /DEF=GDP-GTP exchange protein for Rho1p (predicted)
1772979_at	0.311925	-0.770546	0.275698	-0.15781	S. pombe SPBC651.04 /DEF=hypothetical protein
1771694_at	-0.0284926	0.156445	-0.666739	0.084631	S. pombe SPAC17G8.10c /GEN=dma1 /DEF=zinc finger protein
1773108_at	0.307776	-0.123136	0.54558	-0.261239	S. pombe SPBC651.01c /DEF=GTPase activity (predicted)
1773142_at	-0.00475534	-0.0167125	-0.0870158	-0.00848707	S. pombe SPBC211.06 /GEN=gfh4 /DEF=gamma tubulin complex (pers. comm. Sri Venkatram)
1771538_at	0.0802511	-0.122422	0.120598	-0.0453177	S. pombe SPBC428.20c /GEN=alp6 /DEF=gamma tubulin complex (predicted)
1779545_at	-0.0144898	0.00566228	-0.0314814	0.0251474	S. pombe SPCC417.07c /DEF=gamma tubulin complex (associated with) (PMID Venkatram et al in press) (Sawin et al in press)
1771784_at	-0.00916227	0.199122	-0.123293	-0.0424697	S. pombe SPBC21D10.05c /GEN=ucp3 /DEF=GTPase activating protein (predicted)
1771760_at	0.121374	-0.170879	0.498816	-0.264312	S. pombe SPAC6G9.13c /DEF=sequence orphan
1774392_at	0.229431	-0.0663951	-0.0162223	-0.0847511	S. pombe SPBC1289.04c /GEN=pob1 /DEF=involved in cell polarity (maintenance) (required)
1775805_at	-0.0106227	0.0414864	-0.128699	0.00417455	S. pombe SPBC14C8.06 /GEN=arc1 /DEF=WD repeat protein
1777876_at	0.0201896	0.0698646	-0.00724093	-0.175107	S. pombe SPBC651.12c /DEF=hypothetical protein
1777950_at	-0.0277522	0.0493851	-0.307584	0.0593551	S. pombe SPBC13E7.09 /DEF=verprolin
1776839_at	-0.0258118	0.00943088	0.0816005	0.00240167	S. pombe SPAC4H3.05 /GEN=srs2 /DEF=DNA helicase
1778893_at	0.151245	-0.0257556	0.0982536	-0.30868	S. pombe SPAC1486.04c /GEN=alm1 /DEF=coiled-coil (PMID 10660053)
1770214_at	0.170747	0.0521463	0.0529985	-0.229871	S. pombe SPAC4H3.11c /DEF=hypothetical protein
1773797_s_at	-2.61925	-3.18937	2.93084	3.34107	S. pombe SPBC1711.02 /GEN=matmc /DEF=mating-type m-specific polypeptide mc
1779872_at	-0.124377	-0.0182009	0.00591183	0.0521965	S. pombe SPAC8C9.17c /DEF=DASH complex (predicted)
1771656_at	0.219836	-0.124614	0.624018	-0.256359	S. pombe SPAC17H9.05 /GEN=ebp2 /DEF=P40-like
1779101_at	-0.100917	0.306751	-0.312614	0.0983973	S. pombe SPAC821.12 /GEN=orb6 /DEF=serinethreonine protein kinase
1774973_at	0.00784747	-0.0422503	-0.101063	0.0201953	S. pombe SPCC1906.01 /DEF=mannose-1-phosphate guanyltransferase
1777428_at	-0.0672668	0.121724	-0.0248213	-0.0174284	S. pombe SPAC27F1.04c /GEN=nuf2 /DEF=localization spindle pole body
1779271_at	0.306564	-0.275044	0.285212	-0.37412	S. pombe SPAC18G6.06 /DEF=ribonucleoprotein (RNP) complex (predicted) (PMID 12068309)
1776512_at	-0.0233396	0.197489	-0.302704	0.0925086	S. pombe SPAC1565.06c /GEN=spg1 /DEF=GTPase
1777644_at	0.0665073	-0.00857035	-0.0326405	-0.00166512	S. pombe SPAC19B12.02c /DEF=GPI anchored protein (predicted) (pers. comm. Birgit Eisenhaber)
1770782_at	-0.0438385	0.2017	-0.0536582	0.0019331	S. pombe SPCC188.07 /DEF=sequence orphan
1772858_at	0.0485077	0.0319742	-0.0383908	-0.14371	S. pombe SPAC56E4.04c /GEN=cut6 /DEF=acetyl-CoA carboxylase
1773076_at	-9.60032e-05	0.0459843	0.0702941	-0.235406	S. pombe SPAC1786.03 /GEN=cut11 /DEF=localization nuclear membrane
1776782_at	0.0233307	0.0637932	0.0141201	-0.107666	S. pombe SPAC23C4.18c /GEN=rad4 /DEF=DNA polymerase epsilon (predicted)
1774783_at	0.0749343	-0.05756	0.232457	-0.24106	S. pombe SPBC428.19c /DEF=WD repeat protein
1777216_at	-0.201648	0.217777	-0.510238	0.0442114	S. pombe SPBC32F12.10 /DEF=phosphoglucomutase (predicted)
1770627_at	-0.000789642	-0.0276365	0.0154015	-0.0343234	S. pombe SPBC119.08 /GEN=pmk1 /DEF=serinethreonine protein kinase
1775686_at	0.0393063	0.0354907	-0.117118	-0.101038	S. pombe SPBC29A10.05 /GEN=exo1 /DEF=exonuclease
1777064_at	0.0573562	-0.00894292	-0.099424	-0.0296402	S. pombe SPBC83.01 /GEN=ucp8 /DEF=actin cortical patch component (predicted)
1774454_at	-0.0805883	0.0725517	0.0114613	0.0226021	S. pombe SPBC13E7.06 /DEF=hypothetical protein
1779749_at	0.0734466	0.17047	-0.100813	-0.00837262	S. pombe SPAC227.07c /GEN=pab1 /DEF=protein phosphatase regulatory subunit
1776182_at	0.0701256	-0.136473	0.256719	-0.0627648	S. pombe SPAC1006.08 /GEN=etd1 /DEF=involved in septation (required)
1771913_at	0.0531607	-0.219072	0.260886	-0.0268908	S. pombe SPBC8D2.05c /DEF=involved in spindle assembly (mitotic) (predicted)
1778294_at	0.00752417	-0.0265869	-0.0625782	0.0264359	S. pombe SPCC5E4.04 /GEN=cut1 /DEF=separin
1774549_at	0.0194416	0.0490176	-0.0309432	-0.036946	S. pombe SPBC23G7.08c /GEN=rga7 /DEF=GTPase activating protein
1772129_at	-0.107019	0.140687	0.0150588	0.0165208	S. pombe SPBC2D10.14c /GEN=myo51 /DEF=myosin (type V)
1771208_at	0.096076	-0.0367613	0.0636498	-0.179484	S. pombe SPBC25D12.02c /DEF=hypothetical protein
1776722_at	0.192557	-0.81138	0.214927	-0.7204	S. pombe SPAC19G12.16c /GEN=adg2 /DEF=glycoprotein (predicted)
1777915_at	-0.0322959	0.044014	0.00714493	0.0265185	S. pombe SPCC1442.12 /DEF=CDP-diacylglycerol--serine O-phosphatidyltransferase (predicted)
1779060_at	-0.00209395	0.0946999	-0.0105553	-0.0433238	S. pombe SPAC17H9.11 /DEF=cofilintropomyosin-type
1770756_at	-0.00481923	0.107824	-0.131172	0.0339546	S. pombe SPAC23C4.02 /GEN=crn1 /DEF=WD repeat protein
1773862_at	-0.17886	-0.208902	0.144945	0.0824264	S. pombe SPAC323.03c /DEF=hypothetical protein
1780017_at	0.310607	-0.463665	0.265684	-0.35018	S. pombe SPBC2A9.07c /DEF=sequence orphan
1779292_at	-0.0257619	0.173268	-0.207499	0.00469494	S. pombe SPAC12B10.07 /DEF=F-actin capping protein (alpha subunit)
1779781_at	0.752615	-0.478265	0.491417	-0.382708	S. pombe SPBPB2B2.13 /DEF=galactokinase (predicted)
1778924_at	0.860764	-0.00490316	0.627689	-0.0455783	S. pombe SPAC6G10.12c /GEN=ace2 /DEF=transcrption factor
1771858_at	-0.104282	-0.111388	0.192788	0.0175254	S. pombe SPAC1805.07c /GEN=hos2 /DEF=DASH complex (predicted)
1769699_at	0.0476789	-0.00783284	0.0251881	-0.204739	S. pombe SPBC106.06 /GEN=cct4 /DEF=chaperonin-containing T-complex
1770849_at	0.0922775	0.155993	-0.333969	-0.0972923	S. pombe SPAC6F12.12 /GEN=par2 /DEF=protein phosphatase regulatory subunit (PMID 10757751)
1772506_at	-0.0228704	0.0994199	-0.116438	0.129804	S. pombe SPBC32F12.08c /DEF=DASH complex (predicted)
1772629_at	-0.0232201	0.025898	-0.140823	0.00524584	S. pombe SPBC725.09c /GEN=hob3 /DEF=amphiphysin
1779437_at	0.144204	-0.369584	0.0882368	0.0525532	S. pombe SPAC343.20 /DEF=sequence orphan
1772650_at	0.0196209	0.160052	-0.203348	0.000710487	S. pombe SPCC4G3.19 /GEN=alp16 /DEF=gamma tubulin complex (PMID 1213407)
1774325_at	0.0922174	-0.0283467	0.28987	-0.0365785	S. pombe SPBC3H7.11 /DEF=methyltransferase (predicted)
1769405_at	0.0197255	0.0855376	-0.0424042	-0.00818443	S. pombe SPBC215.15 /GEN=sec13 /DEF=WD repeat protein
1777651_at	-0.596345	0.559464	-0.89531	0.3682	S. pombe SPCC965.06 /DEF=potassium channel subunit ??? (predicted)
1774078_at	0.109882	0.0161155	-0.263998	-0.0341101	S. pombe SPBC19G7.05c /GEN=cps1 /DEF=1,3-beta-glucan synthase (subunit)
1773724_at	0.588184	-0.322794	0.176961	-0.146372	S. pombe SPBC27.04 /DEF=Mre11 complex (multisubunit endonuclease) (predicted)
1774524_at	-0.0455659	0.150829	-0.588495	-0.0185976	S. pombe SPBC4F6.06 /GEN=kin1 /DEF=serinethreonine protein kinase
1777074_at	-0.0434138	0.0556008	-0.00386175	0.00781314	S. pombe SPAC13F5.06c /GEN=sec10 /DEF=localization exocyst
1779104_at	0.0337483	-0.0154305	-0.232261	0.0913356	S. pombe SPBC11C11.02 /GEN=imp2 /DEF=involved in cytokinesis, actomyosin ring formation
1779065_at	0.260141	-0.401635	0.211959	-0.119647	S. pombe SPBC3E7.12c /GEN=cfh4 /DEF=Chs Four Homologue (pers. comm. Henar Montero)
1777676_at	-0.0598183	-0.185473	0.206718	-0.0214872	S. pombe SPAC3G9.12 /DEF=localization spindle pole body (predicted)
1779636_at	-0.0704238	0.108213	-0.22234	0.0506172	S. pombe SPAC17G8.04c /GEN=arc5 /DEF=ARP23 actin-organizing complex
1776780_at	0.132372	0.0191816	-0.00768566	-0.307765	S. pombe SPBC582.03 /GEN=cdc13 /DEF=cyclin
1769646_at	-0.044706	0.0800756	0.125327	-0.192418	S. pombe SPBC29B5.04c /DEF=conserved fungal protein
1770198_at	-0.10887	0.0670468	-0.0481281	0.0443996	S. pombe SPCC1919.10c /GEN=myo52 /DEF=myosin (type V)
1780057_at	0.0625235	-0.0362501	0.035018	-0.09248	S. pombe SPAC110.03 /GEN=cdc42 /DEF=GTPase
1778607_at	-0.549443	0.205071	-0.508089	0.418455	S. pombe SPAP7G5.06 /DEF=amino acid permease family
1769830_at	-0.0551866	0.00650501	-0.0998669	0.0243015	S. pombe SPBC32H8.12c /GEN=act1 /DEF=actin (PMID 1524835)
1773554_at	-0.244318	0.288874	-0.358689	0.147076	S. pombe SPAC1F3.02c /GEN=mkh1 /DEF=MEK kinase (PMID 9199286)
1770351_at	0.0365496	-0.0409873	0.111226	-0.120416	S. pombe SPBC25H2.12c /GEN=cct7 /DEF=chaperonin-containing T-complex
1778595_at	-0.00660674	0.184435	-0.138495	0.0588236	S. pombe SPAC56F8.02 /DEF=AMP binding enzyme (predicted)
1780096_at	-0.0414219	0.0238374	-0.090676	0.480212	S. pombe SPAC1039.05c /DEF=conserved fungal protein
1772237_at	0.0923255	-0.0104456	-0.0336021	-0.0220702	S. pombe SPBC557.04 /DEF=Ark1Prk1 family protein kinase
1771683_at	-0.0339362	0.0568498	-0.19008	0.135527	S. pombe SPBC19G7.16 /DEF=transcription elongation factor complex (predicted)
1774869_at	0.0394309	0.0159403	-0.0157413	0.00357469	S. pombe SPAC1705.03c /DEF=involved in cell wall biosynthesis (predicted)
1777054_at	0.0471204	0.135853	-0.0356283	-0.0892626	S. pombe SPBC1347.10 /GEN=cdc23 /DEF=MCM-associated protein (PMID 12185500)
1777844_at	-0.0698961	0.13349	-0.113262	0.0496852	S. pombe SPBC1778.08c /GEN=arc2 /DEF=ARP23 actin-organizing complex
1777813_at	-0.0640367	0.233962	-0.59852	-0.0542587	S. pombe SPBC14C8.01c /GEN=cut2 /DEF=securin
1777470_at	0.0295315	-0.0134878	-0.0754134	0.0358105	S. pombe SPAC1F7.04 /GEN=rho1 /DEF=GTPase
1770361_at	0.382887	-0.198423	-0.300722	0.134268	S. pombe SPBC19G7.06 /DEF=MAD box transcription factor
1770286_at	-0.373305	0.362974	-0.791203	0.297763	S. pombe SPBC106.13 /DEF=conserved eukaryotic protein
1778511_at	-0.204006	0.366184	-0.602718	0.148864	S. pombe SPBC6B1.02 /DEF=Ark1Prk1 family protein kinase
1774465_at	0.37971	-0.821095	0.381129	-0.421295	S. pombe SPAC14C4.09 /GEN=agn1 /DEF=alpha glucanase (predicted) (pers. comm. Yolanda Sanchez Martin)
1780033_at	0.129466	0.0818392	-0.0893838	-0.114133	S. pombe SPAC3H1.12c /GEN=snt2 /DEF=Lid2 complex (PMID 12488447)
1773029_at	-0.0171998	0.174787	-0.186526	0.0177746	S. pombe SPAC630.03 /GEN=arp3 /DEF=ARP23 actin-organizing complex
1779342_at	-0.0441058	0.0695868	-0.0823418	-0.0287647	S. pombe SPAC24B11.11c /GEN=sid2 /DEF=Sid2p-Mob1p kinase complex
1779989_at	0.0466334	0.254929	-0.202926	-0.00293191	S. pombe SPAC12B10.12c /GEN=rhp41 /DEF=involved in DNA repair (PMID 12807767)
1776627_at	-0.10791	0.358187	-0.153483	0.164876	S. pombe SPCC18.04 /GEN=pof6 /DEF=F-box protein
1776192_at	0.565542	-0.471606	0.302597	-0.214826	S. pombe SPBC12D12.02c /GEN=cdm1 /DEF=DNA polymerase delta (subunit) (PMID 9326594)
1772872_at	0.0342388	0.127063	-0.000683467	-0.13215	S. pombe SPCC16C4.01 /GEN=sif2 /DEF=DUF155
1779885_at	0.112257	-0.149032	0.326025	-0.127513	S. pombe SPAC6G10.07 /DEF=nuclear cap-binding complex (predicted)
1774034_at	0.100857	-0.0852912	0.161393	-0.261938	S. pombe SPBC16C6.09 /DEF=glycosyl transferase family 39
1778213_at	-0.205942	0.0625448	-0.263882	0.2415	S. pombe SPAC25G10.07c /GEN=cut7 /DEF=kinesin-like protein
1778224_at	0.0434116	-0.031798	0.151088	-0.119707	S. pombe SPBC646.11 /GEN=cct6 /DEF=chaperonin-containing T-complex
1777304_at	-0.11603	0.118861	-0.449454	0.0183932	S. pombe SPBC15D4.01c /DEF=kinesin-like protein
1771347_at	-0.0116434	-0.0034097	-0.0761328	0.0687799	S. pombe SPCC1223.06 /GEN=tea1 /DEF=microtubule-associated protein
1774314_at	0.0830469	-0.0199979	-0.302686	0.115482	S. pombe SPAPB1A10.09 /DEF=microtubule-associated protein (predicted)
1780242_at	-0.23329	0.14113	0.0254825	-0.0333487	S. pombe SPAC9G1.09 /GEN=sid1 /DEF=serinethreonine protein kinase
1777166_at	0.0983934	0.129155	-0.019495	-0.135585	S. pombe SPBC1289.01c /GEN=cfh3 /DEF=Chs Four Homologue (pers. comm. Henar Montero)
1778680_at	0.0181026	0.200028	-0.09178	-0.00665792	S. pombe SPAC9G1.11c /GEN=spn4 /DEF=septin
1770734_at	-0.168542	0.168542	-0.382034	0.0784877	S. pombe SPCC306.09c /GEN=cap1 /DEF=actin cortical patch component (predicted)
1771768_at	-0.104045	0.234807	-0.167709	0.0106332	S. pombe SPAC15A10.08 /GEN=ain1 /DEF=alpha-actinin
1772353_at	0.0925852	-0.0246585	-0.0536652	-0.101612	S. pombe SPAC19E9.01c /GEN=nup40 /DEF=nucleoporin
1779298_at	0.0798082	-0.0296612	-0.0214109	-0.0216446	S. pombe SPAC22A12.07c /DEF=glycosyl transferase family 39
1777588_at	0.131783	-0.0749868	0.0534652	-0.162731	S. pombe SPBC947.12 /GEN=kms2 /DEF=coiled-coil (predicted)
1774449_at	0.0532815	0.0411228	-0.0176414	-0.0500008	S. pombe SPAC18G6.15 /GEN=mal3 /DEF=EB1 domain
1779135_at	-0.0742633	0.0665989	-0.0944373	-0.0226463	S. pombe SPBC1271.09 /DEF=membrane transporter
1773419_at	0.0850321	0.0572131	-0.132589	-0.133917	S. pombe SPAC6G9.04 /DEF=pleckstrin homology domain
1778206_at	0.0448751	-0.053448	0.108276	-0.126362	S. pombe SPAC1420.02c /GEN=cct5 /DEF=chaperonin-containing T-complex
1774941_at	-0.0109609	0.139747	-0.327456	-0.0124458	S. pombe SPAC3A11.05c /GEN=kms1 /DEF=meiosis specific protein
1774918_at	0.367695	-0.143238	0.444307	-0.287741	S. pombe SPBC27.01c /DEF=hypothetical protein
1773418_at	0.113332	0.107137	-0.167048	0.0265929	S. pombe SPBC646.17c /DEF=WD repeat protein
1769594_at	-0.134308	0.152826	-0.049077	-0.00604375	S. pombe SPAC139.03 /DEF=transcriptional regulator (predicted)
1778940_at	0.111874	0.143485	-0.0176729	-0.369497	S. pombe SPCC613.04c /GEN=rng3 /DEF=UCS-domain protein (PMID 1085282)
1772415_at	-0.0348272	0.121116	-0.543653	-0.0159356	S. pombe SPAP8A3.04c /GEN=hsp9 /DEF=heat shock protein (PMID 8679693)
1773833_at	-0.071619	0.034091	0.249825	-0.213835	S. pombe SPBC24C6.10c /DEF=hypothetical protein
1778129_at	0.0797151	0.101418	-0.0181545	-0.0303615	S. pombe SPAC31A2.09c /GEN=apm4 /DEF=AP adaptor complex (predicted)
1779258_at	-0.0647214	0.164678	-0.609342	0.131825	S. pombe SPAC21E11.03c /GEN=pcr1 /DEF=transcription factor (PMID 8557039)
1772305_at	0.335417	-0.130464	0.594496	-0.234827	S. pombe SPBC19G7.04 /DEF=transcriptional regulator (predicted)
1773803_at	0.0290972	0.00607332	0.158677	-0.0417973	S. pombe SPBC1778.10c /DEF=phosphoinositide-dependent protein kinase 1 (predicted)
1775511_at	-0.0306721	-0.236634	0.284689	-0.0879793	S. pombe SPCC1442.13c /DEF=hypothetical protein
1778974_at	-0.00434113	-0.127387	0.303734	-0.0974871	S. pombe SPAC23C11.12 /GEN=hcn1 /DEF=anaphase-promoting complex (APC)
1772215_at	-0.00545088	0.0984554	-0.0230179	-0.0405753	S. pombe SPCP1E11.02 /DEF=Ark1Prk1 family protein kinase
1777688_at	-0.0725689	0.154338	0.0764443	-0.0767043	S. pombe SPAC1834.06c /DEF=conserved eukaryotic protein
1774329_at	-0.0839898	0.0810671	0.0701119	-0.116839	S. pombe SPAC926.07c /DEF=dynein light chain (predicted)
1775880_at	-0.0178537	-0.116506	0.0985848	-0.0301412	S. pombe SPBC11G11.02c /GEN=end3 /DEF=actin cortical patch component (predicted)
1769867_at	0.0120551	0.0797342	-0.0171324	0.0121619	S. pombe SPAC607.09c /GEN=btn1 /DEF=battenin family protein
1776867_at	0.0513315	0.0348584	-0.107425	-0.0237579	S. pombe SPAC27F1.02c /GEN=cdc8 /DEF=tropomyosin
1775383_at	0.0376107	0.189762	-0.24541	-0.102168	S. pombe SPAC25G10.09c /DEF=actin cortical patch component (predicted)
1776209_at	0.0735566	0.0505501	-0.207841	-0.0431299	S. pombe SPBC336.15 /GEN=pic1 /DEF=localization centromere
1772256_at	0.0120055	0.030673	0.00041453	-0.0383746	S. pombe SPBC26H8.07c /GEN=nda3 /DEF=tubulin (beta) (PMID 6094012)
1779187_at	-0.0167789	0.0214949	-0.0679588	0.054691	S. pombe SPAC20G4.06c /GEN=adf1 /DEF=cofilin
1778938_at	0.292322	-0.117692	0.236512	-0.131658	S. pombe SPBC651.03c /GEN=gyp10 /DEF=TBC domain protein
1774203_at	0.230154	0.133929	-0.103052	-0.255593	S. pombe SPCC16C4.07 /GEN=scw1 /DEF=RNA-binding protein
1779992_at	-0.0368805	0.0313991	-0.0642338	0.0346766	S. pombe SPCC1620.14c /GEN=snf22 /DEF=SNF2 family
1772926_at	0.194644	-0.0918264	-0.121833	0.0218786	S. pombe SPAC23C4.13 /GEN=bet1 /DEF=SNARE (predicted)
1778158_at	-0.26527	0.242093	-0.139517	0.360871	S. pombe SPBC651.05c /DEF=EAP30 family
1774029_at	0.0177155	-0.0716963	0.064338	0.0530081	S. pombe SPBC649.05 /GEN=cut12 /DEF=localization spindle pole body (PMID 9531532)
1773192_at	0.171237	-0.0986834	0.148003	-0.0953334	S. pombe SPBC725.17c /DEF=RNA polymerase I component (predicted)
1771094_at	-0.0472024	0.0811809	-0.0885642	0.0237064	S. pombe SPBC1773.09c /DEF=DNAJ domain protein
1771888_at	0.150649	-0.107416	0.511819	-0.304254	S. pombe SPAPB1E7.10 /GEN=rpc17 /DEF=DNA-directed RNA polymerase III complex (predicted)
1771466_at	-0.0599502	0.283586	-0.329696	0.0311206	S. pombe SPCC970.09 /GEN=sec8 /DEF=localization exocyst
1773439_at	0.128832	-0.356607	0.0723368	-0.0351992	S. pombe SPAPYUG7.03c /GEN=mid2 /DEF=pleckstrin homology domain
1770618_at	0.0738684	0.125655	-0.391912	-0.108889	S. pombe SPBC1604.14c /GEN=shk1 /DEF=serinethreonine protein kinase
1777226_at	-0.069122	0.159588	-0.0410865	0.0150979	S. pombe SPCC1235.06 /GEN=sif1 /DEF=involved in meiosis (predicted)

## Sheet: Cellular Response to Stress
Probe Set ID	[set3D, DMSO]	[set3D, LatA]	[Wild Type, DMSO]	[Wild type, LatA]	Target Description
1774187_at	-0.639498	0.792613	-1.13686	0.325867	S. pombe SPAC15A10.05c /DEF=conserved protein (broad species distribution)
1770678_at	-0.833157	0.46569	-1.4816	0.468244	S. pombe SPAC2E1P3.01 /DEF=zinc binding dehydrogenase
1772673_at	-0.174709	0.234733	-0.3034	0.0153522	S. pombe SPBC14F5.10c /DEF=zinc finger protein
1773592_at	-0.0136172	0.414808	-0.607525	-0.0439631	S. pombe SPBC4F6.16c /DEF=oxidoreductase
1778602_at	-0.529983	0.595392	-1.35563	0.192717	S. pombe SPAC3C7.05c /DEF=glycosyl hydrolase family 76
1773851_at	0.0548239	0.217535	-0.0688626	-0.0770798	S. pombe SPBC17D11.01 /DEF=peptidase family C48
1774185_at	-0.890039	0.597701	-0.613416	1.63525	S. pombe SPCC1739.08c /DEF=short chain dehydrogenase
1776383_at	0.0465838	-0.206614	0.267985	-0.0405318	S. pombe SPAC27E2.10c /GEN=rfc3 /DEF=AAA family ATPase
1769545_at	0.430194	-0.0956764	0.367572	-0.230831	S. pombe SPBC16D10.06 /DEF=ZIP zinc transporter domain
1777090_at	-0.139812	-0.088472	0.0823914	-0.00741132	S. pombe SPBC30D10.08 /GEN=mgm101 /DEF=mitochondrial nucleoid protein
1772082_at	-0.172508	0.371474	-0.363689	0.152016	S. pombe SPBC29A3.03c /DEF=zinc finger protein
1773005_at	-0.0941324	0.203222	-0.250643	0.0662524	S. pombe SPAC17C9.01c /GEN=nuc2 /DEF=anaphase-promoting complex (APC) (PMID 12477395)
1771607_at	-0.0294663	0.0104774	-0.0262566	0.0214554	S. pombe SPAC17H9.03c /DEF=sequence orphan
1778068_at	-0.832878	0.229288	-2.87367	0.0770505	S. pombe SPBC56F2.06 /DEF=hypothetical protein
1770097_at	-0.136131	-0.0276241	-0.293525	0.240394	S. pombe SPCC1020.05 /DEF=calcineurin-like phosphoesterase
1778009_at	0.0887725	-0.0187035	0.0419162	-0.132085	S. pombe SPCC1795.08c /DEF=Myb family
1773442_at	0.0322968	0.10116	-0.0345701	-0.154711	S. pombe SPAC17A2.12 /DEF=zinc finger protein
1777716_at	-0.309738	0.118596	-1.61488	0.0256303	S. pombe SPAC637.03 /DEF=hypothetical protein
1778336_at	-0.132575	0.381687	-0.611371	-0.0149142	S. pombe SPACUNK4.16c /DEF=glycosyl transferase family 20
1778436_at	0.164158	-0.142214	0.0924254	-0.210787	S. pombe SPAC3C7.12 /GEN=noc1 /DEF=microtubule-associated protein (PMID 11007487)
1771285_at	-0.0540997	0.245369	-0.0505152	0.110278	S. pombe SPBC20F10.03 /DEF=conserved eukaryotic protein
1770905_at	-0.898168	0.367967	-1.49128	0.346615	S. pombe SPCC965.07c /GEN=gst2 /DEF=glutathione S-transferase (PMID 11997110)
1772299_at	0.198576	0.0449254	-0.144047	-0.111321	S. pombe SPCC736.15 /DEF=hypothetical protein
1772471_at	0.0204767	0.165387	-0.0503839	-0.174076	S. pombe SPAC14C4.13 /GEN=rad17 /DEF=involved in DNA damage checkpoint (PMID 8019001)
1776433_at	-0.0464392	-0.0314398	-0.112623	0.126396	S. pombe SPACUNK4.15 /DEF=hypothetical protein
1772042_at	0.145841	-0.0751038	0.202675	-0.161507	S. pombe SPAC139.01c /DEF=XP-G family
1776482_at	-0.165287	0.305583	-0.498212	-0.056983	S. pombe SPCC830.07c /GEN=psi1 /DEF=DNAJ domain protein
1770498_at	0.127927	0.100391	-0.0622813	-0.136352	S. pombe SPAC31A2.12 /DEF=arrestin family
1772771_at	-0.158915	0.457813	-0.607881	0.0108423	S. pombe SPBC21H7.06c /DEF=conserved eukaryotic protein
1769353_at	0.153238	-0.120087	0.308233	-0.253887	S. pombe SPBC2D10.12 /GEN=rhp23 /DEF=involved in DNA repair (PMID 10652237)
1776789_at	-0.100061	-0.0102752	0.0748202	-0.0115019	S. pombe SPCC1235.03 /DEF=smr domain protein (small muts related protein)
1777742_at	0.0355361	0.204088	-0.215738	0.0550089	S. pombe SPAC9.05 /DEF=DEADDEAH box helicase
1774811_at	0.0984532	-0.12381	0.556626	-0.145663	S. pombe SPAC27E2.02 /DEF=RWD domain
1773350_at	-0.0489664	0.059514	0.0961266	-0.0107498	S. pombe SPCC126.02c /GEN=pku70 /DEF=DNA helicase
1771909_at	-0.0312411	0.0270913	0.131648	-0.121791	S. pombe SPBC30B4.07c /GEN=tfb4 /DEF=transcription initiation factor activity
1770493_at	-0.00539525	-0.0192372	0.0471471	0.00278409	S. pombe SPBC3H7.04 /DEF=superoxide dismutase (predicted)
1772575_at	0.019509	-0.0231632	-0.13931	0.0703379	S. pombe SPAC15A10.03c /GEN=rhp54 /DEF=DEADDEAH box helicase
1770499_at	-0.443868	0.511613	-1.34233	0.0564232	S. pombe SPAC26F1.04c /DEF=zinc binding dehydrogenase (predicted)
1774039_at	-0.351221	0.27034	-0.685969	0.343008	S. pombe SPAC589.07c /DEF=WD repeat protein
1771011_at	-0.132744	0.203364	-0.173912	0.0590337	S. pombe SPCC663.06c /DEF=short chain dehydrogenase (predicted)
1773014_at	-0.372735	0.283124	-0.424836	0.623076	S. pombe SPCC663.08c /DEF=short chain dehydrogenase (predicted)
1770119_at	-0.39715	0.198236	-0.483113	0.607184	S. pombe SPAC11D3.16c /DEF=sequence orphan
1774446_at	-0.00927321	0.0709477	-0.0617739	0.0495812	S. pombe SPBC19G7.01c /GEN=msh2 /DEF=MutS family
1775561_at	-0.00726446	-0.0879218	0.0964076	-0.147193	S. pombe SPBC16G5.12c /GEN=top3 /DEF=DNA topoisomerase III
1772061_at	0.200543	0.166313	-0.00136121	-0.404827	S. pombe SPAC222.07c /GEN=hri2 /DEF=serinethreonine protein kinase
1775372_at	0.0456909	0.00184504	-0.152278	0.0177196	S. pombe SPBC713.11c /DEF=UPF0057 family
1774866_at	0.00393041	0.00518004	-0.0967115	0.189241	S. pombe SPBC36B7.09 /DEF=RWD domain
1779244_at	-0.0103823	0.0839898	-0.160316	0.0284758	S. pombe SPAC29B12.01 /DEF=SNF2 family
1770658_at	-0.035121	-0.0970561	0.254838	0.0562096	S. pombe SPBC3D6.10 /GEN=apn2 /DEF=DNA-(apurinic or apyrimidinic site) lyase activity (predicted)
1780219_at	-0.349886	-0.201503	0.254244	0.244997	S. pombe SPBC409.03 /GEN=swi5 /DEF=involved in mating-type switching (PMID 2598273)
1777089_at	-0.148593	0.525921	-0.299957	0.21226	S. pombe SPAC13C5.06c /DEF=sequence orphan
1776984_at	-0.0215098	-0.0733703	0.267376	0.0445433	S. pombe SPAC637.12c /GEN=mst1 /DEF=MYST-family HAT (pers. comm. S. Forsburg)
1779719_at	-0.231774	0.0892502	-0.0984736	0.102909	S. pombe SPBC582.10c /DEF=DEADDEAH box helicase
1772151_at	-0.137355	0.415803	-0.411043	0.215083	S. pombe SPAC513.07 /DEF=cinnamoyl-CoA reductase (predicted)
1769382_at	0.029754	-0.226766	0.235129	-0.0143172	S. pombe SPBC16A3.11 /GEN=eso1 /DEF=involved in sister chromatid cohesion (required) (S phase)
1779581_at	-0.0632111	0.0280377	-0.466596	0.258137	S. pombe SPAC19E9.03 /GEN=pas1 /DEF=cyclin (PMID 10982385)
1775753_at	-0.0243254	0.207353	-0.227455	-0.0178057	S. pombe SPBC660.11 /GEN=tcg1 /DEF=single-stranded telomeric binding protein (PMID 12519786)
1779262_at	0.110933	-0.0659501	0.139148	-0.0948445	S. pombe SPAC16E8.11c /GEN=tfb1 /DEF=transcription initiation factor activity
1773366_at	0.0672194	0.0488647	-0.184423	-0.113576	S. pombe SPAC17H9.10c /GEN=ddb1 /DEF=XP-E family
1773556_at	0.0811119	-0.155208	0.0430549	0.0470584	S. pombe SPBC660.13c /GEN=ssb1 /DEF=DNA replication factor A complex (subunit 1) (PMID 9111307) (PMID 8702843)
1773304_at	-0.0369902	0.0653715	-0.00927925	-0.00646623	S. pombe SPAC7D4.07c /GEN=trx2 /DEF=thioredoxin I (PMID 12020831)
1772498_at	-0.00991599	0.0269982	-0.168406	0.133986	S. pombe SPAC13F5.03c /DEF=glycerol dehydrogenase (Phlippen, Stevens, Wolf, Zimmermann manuscript in preparation)
1779701_at	0.0330633	-0.0445191	0.0381937	0.0460145	S. pombe SPAC20H4.07 /GEN=rhp57 /DEF=RecA family
1776972_at	0.0166957	-0.0343568	0.0111659	-0.0107018	S. pombe SPBC216.01c /DEF=conserved eukaryotic protein
1774262_at	-0.360119	0.348704	-0.644945	0.437658	S. pombe SPBC3H7.08c /DEF=sequence orphan
1772834_at	-0.23483	0.186565	-1.16407	0.210316	S. pombe SPAC3A11.10c /DEF=microsomal dipeptidase (predicted)
1772270_at	-0.321362	-0.346107	0.363095	0.121166	S. pombe SPCC736.09c /DEF=similar to translin-associated protein x
1779729_at	-0.0648397	-0.237719	0.403029	0.0613763	S. pombe SPAC1952.07 /GEN=rad1 /DEF=involved in DNA repair (PMID 7254221)
1769498_at	0.00838693	-0.0507072	0.176209	-0.0264826	S. pombe SPAC8F11.03 /GEN=swi4 /DEF=MutS family
1779954_at	-0.0116933	-0.0517168	-1.68569	0.0965274	S. pombe SPCPB1C11.02 /DEF=amino acid permease family (predicted)
1772118_at	0.0592782	0.0406218	-0.329927	0.0131016	S. pombe SPBC32F12.09 /GEN=rum1 /DEF=CDK inhibitor
1776738_at	-0.00780678	0.0179612	0.132467	-0.0232032	S. pombe SPAC13F5.01c /GEN=msh1 /DEF=MutS family
1777965_at	0.157826	-0.159775	0.0366891	-0.0781889	S. pombe SPAC2G11.12 /GEN=hus2 /DEF=RecQ type DNA helicase
1772124_at	-0.315066	0.187489	-0.614776	0.0417865	S. pombe SPAC9E9.11 /GEN=plr1 /DEF=pyridoxal reductase (PMID 10438489)
1770608_at	-0.0707846	-0.106272	0.133393	-0.0031786	S. pombe SPAC9G1.13c /DEF=Myb family
1778786_at	0.148702	0.0826238	0.0542475	-0.220064	S. pombe SPAC343.09 /DEF=UBX domain
1774013_at	-0.0743583	-0.096	0.0784626	0.0693947	S. pombe SPAC17H9.09c /GEN=ras1 /DEF=GTPase
1775888_at	-0.143245	-0.0263399	0.00768344	0.0593573	S. pombe SPBC12C2.13c /GEN=fnx1 /DEF=MFS multidrug efflux transporter
1769605_at	-0.0261148	0.0269213	-0.115628	0.0182238	S. pombe SPAC8E11.02c /GEN=rad24 /DEF=involved in DNA repair
1778926_at	-0.115854	0.344411	-0.14388	0.175315	S. pombe SPAC3G6.05 /DEF=Mvp17PMP22 family
1775232_at	-0.00427024	0.145121	-0.0547841	-0.0353184	S. pombe SPAPYUG7.02c /GEN=sin1 /DEF=stress activated map kinase interacting protein
1775145_at	0.0902611	0.161142	-0.185542	-0.0309928	S. pombe SPAC24B11.06c /GEN=sty1 /DEF=serinethreonine protein kinase
1778676_at	-0.737879	0.267972	-0.759813	2.18549	S. pombe SPBC1683.06c /DEF=inosine-uridine preferring nucleoside hydrolase (predicted)
1779975_at	0.0836112	0.417872	-0.258576	-0.0287441	S. pombe SPAC2E12.02 /GEN=hsf1 /DEF=transcriptional activator
1777471_at	0.0989154	0.109119	-0.0525668	-0.119227	S. pombe SPCC965.05c /GEN=thp1 /DEF=uracil DNA N-glycosylase activity (IDA) (PMID 12711670)
1778875_at	-0.52229	0.30513	-1.67645	0.261562	S. pombe SPCC191.01 /DEF=sequence orphan
1769714_at	-0.293039	0.142411	-0.869815	0.329525	S. pombe SPAC1687.14c /DEF=EF hand
1776242_at	-0.124266	0.225362	-0.338009	0.0948817	S. pombe SPBC15D4.07c /GEN=apg9 /DEF=involved in autophagy (predicted)
1775455_at	-0.175457	0.198002	-0.594808	0.100368	S. pombe SPAC29B12.11c /DEF=orthologue of human WW domain binding protein-2
1778543_at	-0.0250845	0.0748914	0.0136372	-0.1067	S. pombe SPBC20F10.10 /DEF=cyclin
1774704_at	0.0804071	0.0254421	-0.0639079	-0.0736844	S. pombe SPBC800.09 /GEN=sum2 /DEF=involved in G2M transition checkpoint (required) (PMID 9832516)
1775840_at	0.0284964	-0.35807	0.0744715	-0.0431617	S. pombe SPAC19G12.06c /GEN=hta2 /DEF=histone H2A (beta)
1770989_at	0.116602	-0.399397	0.292566	-0.0807921	S. pombe SPCC553.07c /DEF=translesion DNA repair polymerase (predicted)
1776259_at	-0.643047	0.558	-1.35956	0.266956	S. pombe SPBC215.11c /DEF=aldoketo reductase
1779530_at	0.00114981	-0.0240911	0.175995	0.0200863	S. pombe SPAC22G7.04 /GEN=ubp13 /DEF=WD repeat protein (SMART)
1777229_at	-0.171797	0.217079	-0.450398	0.069128	S. pombe SPBC216.04c /DEF=methionine sulfoxide (predicted) (PMID 11929995)
1771646_at	-0.0418838	0.319074	-0.491387	0.0795962	S. pombe SPCC24B10.07 /GEN=gad8 /DEF=serinethreonine protein kinase (PMID 12805221)
1776900_at	-0.665554	0.628449	-1.97895	0.404607	S. pombe SPAC15E1.02c /DEF=sequence orphan
1777023_at	0.01581	-0.0254545	0.0288932	0.000124931	S. pombe SPBC1921.02 /GEN=rad60 /DEF=involved in DNA repair (PMID 11971984)
1773452_at	0.191296	-0.497182	0.169313	-0.170115	S. pombe SPBC26H8.06 /GEN=grx5 /DEF=arsenate reductase (glutaredoxin) activity (predicted)
1776822_at	0.0572281	0.118092	-0.235848	-0.0130234	S. pombe SPCC18B5.03 /GEN=wee1 /DEF=serinethreonine protein kinase
1776513_at	0.0256268	-0.0436767	0.133187	-0.0965675	S. pombe SPBC23E6.07c /GEN=rfc1 /DEF=replication factor C complex
1770007_at	-0.0802075	0.246838	-0.163729	0.0702791	S. pombe SPCC1281.07c /DEF=glutathione S-transferase (predicted)
1776918_at	0.121956	-0.861607	0.747381	0.0439733	S. pombe SPAC5H10.06c /GEN=adh4 /DEF=alcohol dehydrogenase (PMID 15040954)
1770601_at	-0.384699	0.854552	-1.02013	0.362028	S. pombe SPCC1393.12 /DEF=sequence orphan
1772155_at	0.239922	0.153831	0.115051	-0.556084	S. pombe SPAC11D3.13 /DEF=ThiJ domain
1777285_at	-0.160879	0.0633103	-0.763384	0.284686	S. pombe SPBC17D11.08 /DEF=WD repeat protein
1780164_at	0.0619589	-0.250468	0.585696	-0.0249662	S. pombe SPBC13G1.04c /DEF=alkB homolog
1769838_at	0.242615	2.46251	-0.767653	-0.0357424	S. pombe SPBC24C6.09c /DEF=phosphoketolase (predicted)
1773756_at	0.0261752	0.0563504	-0.00731881	-0.147489	S. pombe SPAC13F5.05 /DEF=protein disulfide isomerase
1769725_at	-0.815598	0.760302	-2.52118	0.291963	S. pombe SPAC22H10.13 /GEN=zym1 /DEF=metallothionein (PMID 12050156)
1776795_at	0.708228	2.02533	-1.94046	-0.17553	S. pombe SPAC23H3.15c /DEF=serine-rich protein
1777173_at	-0.231741	0.313296	-0.259238	0.125173	S. pombe SPAC688.13 /GEN=scn1 /DEF=TatD DNase family
1773394_at	-0.643926	0.678462	-1.34078	0.354139	S. pombe SPAC26F1.14c /DEF=flavoprotein (predicted)
1772577_at	-0.101662	0.0378984	-0.491882	0.225769	S. pombe SPBC106.02c /DEF=ParBc-like nuclease domain (SMART)
1770252_at	-0.0400508	0.10466	-0.181088	0.0312767	S. pombe SPAC17A2.13c /GEN=rad25 /DEF=14-3-3 protein
1775752_at	0.113123	-0.119401	0.0585143	-0.0946919	S. pombe SPAC5D6.13 /DEF=involved in intracellular protein transport (predicted)
1777713_at	-0.00699139	-0.0485036	-0.465011	0.14619	S. pombe SPBC216.05 /GEN=rad3 /DEF=ATR (ATM) checkpoint kinase
1776181_at	0.0402819	0.497711	-0.935055	-0.0202379	S. pombe SPBC3E7.02c /GEN=hsp16 /DEF=heat shock protein
1775082_at	-0.445023	0.722244	-0.522447	0.317074	S. pombe SPAC22G7.11c /DEF=conserved fungal protein
1778902_at	-0.419896	0.434783	-1.01522	0.157602	S. pombe SPAC22E12.03c /DEF=THIJPFPI family protein
1778923_at	-0.262974	0.0628891	-0.254764	0.295513	S. pombe SPAC1556.01c /GEN=rad50 /DEF=involved in DNA repair
1772526_at	-0.113019	0.124048	-0.377045	0.0162115	S. pombe SPAC3A11.06 /GEN=mvp1 /DEF=phosphoinositide binding (predicted)
1770218_at	0.112948	1.43265	-1.31496	0.139277	S. pombe SPAC3G6.07 /DEF=dubious
1776584_at	-0.0640494	0.439879	-0.528683	-0.157275	S. pombe SPBC4F6.17c /DEF=AAA family ATPase
1772018_at	0.0347363	0.220527	-0.126739	-0.0281499	S. pombe SPCC1322.04 /DEF=UTP-glucose-1-phosphate uridylyltransferase activity (predicted)
1776038_at	-0.0808423	0.709028	-0.0645939	-0.0812833	S. pombe SPBP8B7.05c /DEF=carbonic anhydrase family
1775099_at	-0.0447423	-0.0926574	0.21157	-0.121709	S. pombe SPAC30D11.07 /GEN=nth1 /DEF=DNA endonuclease III
1775503_at	-0.12475	0.0824595	-0.24395	0.135138	S. pombe SPAC3A12.18 /GEN=zwf1 /DEF=glucose-6-phosphate 1-dehydrogenase (predicted)
1778178_at	-0.0887683	0.218968	-0.355015	-0.0685323	S. pombe SPCC338.06c /DEF=heat shock protein
1773037_at	-0.177082	0.0838531	-0.548272	0.278637	S. pombe SPBP4H10.10 /DEF=rhomboid family protease
1773867_at	-0.00356134	0.217838	-0.23336	0.00927289	S. pombe SPAP32A8.02 /DEF=aldoketo reductase
1773213_at	0.0316302	-0.0363712	0.0284211	-0.162686	S. pombe SPAC110.04c /GEN=pss1 /DEF=heat shock protein 70 family
1776599_at	-0.267256	0.168125	-0.44355	0.0814673	S. pombe SPAC5D6.07c /DEF=hypothetical protein
1771283_at	0.140353	-0.161075	0.275661	-0.0978025	S. pombe SPCC1450.06c /GEN=grx3 /DEF=arsenate reductase (glutaredoxin) activity
1779241_at	0.0256856	-0.0514196	0.269824	-0.149177	S. pombe SPAC26H5.02c /DEF=AAA family ATPase
1772800_at	-0.221804	0.171793	-0.394946	0.0960143	S. pombe SPAC26F1.07 /DEF=aldoketo reductase
1769734_s_at	0.00303682	-0.140972	-0.129261	0.564554	S. pombe SPAC186.03 /DEF=L-asparaginase
1774252_at	0.180487	0.0498508	0.1834	-0.14761	S. pombe SPAC3H1.10 /DEF=phytochelatin synthetase (PMID 10368185) (PMID 10369673)
1770069_at	-0.108164	0.0461025	-0.635487	0.0462195	S. pombe SPCC1183.11 /DEF=MS ion channel
1771295_at	0.0503677	0.115094	-0.121646	-0.0329383	S. pombe SPCC622.17 /GEN=apn1 /DEF=AP endonuclease
1780048_at	0.0429014	-0.109703	-0.152824	0.118799	S. pombe SPAC57A10.09c /DEF=HMG box
1775119_at	-0.257974	0.0817156	-1.02906	0.319057	S. pombe SPCC417.05c /GEN=cfh2 /DEF=Chs Four Homologue (pers. comm. Henar Montero)
1774916_at	0.0708507	-0.185313	0.475669	0.0692533	S. pombe SPAP27G11.15 /GEN=slx1 /DEF=stucture-specific endonuclease (catalytic subunit) (PMID 14528010)
1769567_at	-0.180638	-0.305524	-0.363026	0.712473	S. pombe SPBC1773.17c /DEF=glycerate and formate dehydrogenase (predicted)
1773200_at	0.0586678	-0.056757	0.315315	-0.0274487	S. pombe SPCC970.01 /GEN=rad16 /DEF=ss DNA endonuclease
1778727_at	-0.181871	0.0650059	-0.427572	0.373304	S. pombe SPAC4G8.10 /GEN=gos1 /DEF=SNARE
1779501_at	-0.505739	0.506553	-1.14359	0.338361	S. pombe SPAPB24D3.08c /DEF=NADP dependent oxidoreductase (predicted)
1770675_at	-0.0271702	-0.0532401	-0.265632	0.148247	S. pombe SPAC1D4.13 /GEN=byr1 /DEF=serinethreonine protein kinase
1779967_at	0.109964	-0.018294	0.244869	-0.123411	S. pombe SPCC645.04 /DEF=sequence orphan
1769546_at	-0.0165259	-0.203003	0.40115	0.00385094	S. pombe SPCC191.09c /GEN=gst1 /DEF=glutathione S-transferase (PMID 12063243)
1770206_at	0.116649	0.0606922	-0.0704927	-0.243322	S. pombe SPAC16A10.07c /GEN=taz1 /DEF=involved in telomere maintenance
1776741_at	0.0665372	0.00498994	0.0400337	-0.0725063	S. pombe SPAC20H4.04 /DEF=DEADDEAH box helicase
1779728_at	-0.127472	0.10591	0.0295684	-0.0949434	S. pombe SPBC19C7.09c /GEN=uve1 /DEF=endonuclease activity (PMID 8065916)
1772702_at	0.0802307	-0.0454896	0.0995595	-0.100581	S. pombe SPAC630.13c /GEN=tsc2 /DEF=tuberin
1780223_at	-0.659998	0.208224	-1.39791	0.35377	S. pombe SPAC29A4.17c /DEF=conserved eukaryotic protein
1770755_at	-0.190274	0.0391127	0.0312166	0.0095094	S. pombe SPAC1783.06c /DEF=similar to S. cerevisiae YBR217W
1770083_at	-0.0742963	0.00199699	0.0126562	0.0089318	S. pombe SPAC23E2.01 /GEN=fep1 /DEF=iron-sensing transcriptional regulator
1770857_at	0.00244713	0.0131496	0.0167027	-0.0935723	S. pombe SPBC336.01 /GEN=fdh1 /DEF=DNA helicase
1769497_at	0.0438245	0.240799	-0.0262947	-0.0305125	S. pombe SPBC3D6.11c /GEN=slx8 /DEF=zinc finger protein
1776533_at	-0.11567	0.142495	-0.138634	0.0940472	S. pombe SPAPB1A10.12c /DEF=D-arabinono-1,4-lactone oxidase activity (predicted)
1779685_at	0.111902	-0.0731837	0.113863	-0.0925461	S. pombe SPBC16D10.09 /GEN=pcn1 /DEF=PCNA (PMID 1361173)
1772425_at	-0.293225	0.0839736	-1.19192	0.17566	S. pombe SPAC19G12.09 /DEF=oxidoreductase (predicted)
1774065_at	-0.247676	0.25591	-0.43103	-0.177115	S. pombe SPBC36.02c /DEF=unknown specificity
1770703_at	-0.25931	0.153821	-0.452376	-0.00794792	S. pombe SPAC23C11.16 /GEN=plo1 /DEF=serinethreonine protein kinase
1779390_at	0.0457045	-0.0798321	0.0278082	0.28807	S. pombe SPAC15A10.01 /DEF=ABC transporter family
1779339_at	-0.171956	-0.0156342	-0.434733	0.842281	S. pombe SPAC57A7.05 /DEF=hypothetical protein
1774364_at	0.19005	-0.23759	0.315158	-0.166287	S. pombe SPBC887.14c /GEN=pfh1 /DEF=DNA helicase (5-3) (PMID 12058079)
1774882_at	-0.500841	0.813937	-0.609824	1.51784	S. pombe SPAC1F8.04c /DEF=chlorohydrolasedeaminase
1773220_at	-0.483096	0.318981	-0.829818	0.154745	S. pombe SPAC6G10.03c /DEF=abhydrolase family
1776189_at	0.620632	-0.413046	-0.048048	-0.0171563	S. pombe SPAC1565.04c /GEN=ste4 /DEF=involved in conjugation
1775287_at	-0.0901632	-0.03877	0.0869617	-0.00736968	S. pombe SPAC664.07c /GEN=rad9 /DEF=involved in DNA repair
1773549_at	-0.194345	0.205269	-0.380896	0.208611	S. pombe SPBC1289.14 /DEF=adducin N-terminal domain protein
1771374_at	-0.00652059	-0.0226262	0.114325	-0.0507787	S. pombe SPBC582.05c /GEN=brc1 /DEF=BRCT domain
1775300_at	-0.944713	0.472365	-1.85247	0.0792093	S. pombe SPBC725.03 /DEF=hypothetical protein
1779672_at	0.0698166	-0.206826	0.12931	-0.633238	S. pombe SPCC23B6.05c /GEN=ssb3 /DEF=DNA replication factor A complex (subunit 3)
1774406_at	-0.0417302	-0.0523027	-0.0949383	0.0760339	S. pombe SPAC1B3.11c /GEN=ypt4 /DEF=GTPase
1771895_at	-0.205341	0.317338	-0.651667	0.158522	S. pombe SPBC23G7.06c /DEF=conserved eukaryotic protein
1769386_at	-0.161818	0.278667	-0.289362	0.105163	S. pombe SPAC343.06c /DEF=scramblase
1770086_at	-0.754984	0.460426	-1.10691	0.446288	S. pombe SPAC4H3.04c /DEF=conserved eukaryotic protein
1774659_at	-0.0333207	0.0912018	0.0173267	-0.0879021	S. pombe SPBC31F10.13c /GEN=hip1 /DEF=hira protein
1776677_at	0.0858246	0.0317033	-0.041295	-0.0225143	S. pombe SPBC16E9.01c /DEF=sequence orphan
1774381_at	-0.0223185	0.254651	-0.113581	-0.0314023	S. pombe SPBC947.11c /DEF=replication factor C complex (predicted) (ISS)
1778373_at	-0.129547	0.017004	-0.0329498	0.112528	S. pombe SPAC16A10.06c /DEF=zinc finger protein
1775361_at	-0.30654	0.163749	-0.653786	0.123789	S. pombe SPAC17C9.11c /DEF=zinc finger protein
1774637_at	-0.192432	0.00719897	-0.0422675	0.269896	S. pombe SPBC1539.07c /DEF=glutathione dependent formaldehyde dehydrogenase (predicted)
1772866_at	0.241136	-0.364747	0.179046	-0.193137	S. pombe SPCC338.17c /GEN=rad21 /DEF=mitotic cohesin complex (subunit) (PMID 11069892)
1779486_at	-0.164619	0.0987295	-0.121556	0.205369	S. pombe SPAC1D4.12 /GEN=rad15 /DEF=transcription factor TFIIH complex
1778432_at	-0.0418746	-0.0331748	-0.00677967	0.144594	S. pombe SPAC144.05 /DEF=zinc finger protein
1769757_at	-0.350454	0.503315	-0.983092	0.218042	S. pombe SPAC1687.22c /DEF=RNA-binding protein
1774951_at	0.230256	0.298995	-0.154617	-0.311408	S. pombe SPBC106.11c /DEF=phospholipase A2 (predicted)
1777025_at	-0.31404	0.73385	-0.839686	0.158651	S. pombe SPAC3C7.13c /DEF=glucose-6-phosphate 1-dehydrogenase (predicted)
1776276_at	0.0735795	-0.026049	0.0493069	-0.126224	S. pombe SPAC6F6.17 /GEN=rif1 /DEF=essential
1775545_at	0.0169061	-0.101577	0.199141	-0.154098	S. pombe SPBC216.06c /GEN=swi1 /DEF=involved in mating-type switching (PMID 6587363)
1777550_at	-0.258815	0.165053	-0.565441	0.115314	S. pombe SPAC15E1.10 /DEF=sequence orphan
1779607_at	-0.253656	0.253622	-0.95767	-0.0164747	S. pombe SPBC1105.14 /DEF=zinc finger protein
1778027_at	0.209906	-0.250773	-0.596689	0.252054	S. pombe SPAC23G3.03 /DEF=peptide monooxygenase (predicted)
1769856_at	-0.49346	0.510273	-1.25496	0.604602	S. pombe SPAC20G4.03c /GEN=hri1 /DEF=serinethreonine protein kinase
1773440_at	-0.0856457	0.25213	-0.293716	0.0502996	S. pombe SPBC30D10.10c /GEN=tor1 /DEF=phosphatidylinositol kinase
1772245_at	-0.449189	0.456189	-1.1556	0.189829	S. pombe SPAC4D7.02c /DEF=glycerophosphoryl diester phosphodiesterase (predicted)
1773184_at	0.447382	-0.789603	0.279315	-0.576412	S. pombe SPAC17H9.19c /GEN=cdt2 /DEF=WD repeat protein
1776847_at	-0.170228	-0.548788	0.295563	0.0928144	S. pombe SPAC22F3.03c /GEN=rdh54 /DEF=DEADDEAH box helicase (PMID 14551247)
1776487_at	-0.779015	1.50222	-1.3985	0.293634	S. pombe SPAC513.02 /DEF=phosphoglycerate mutase family
1771180_at	-0.0362895	-0.0643441	0.0163844	0.0808036	S. pombe SPAC1F12.06c /DEF=conserved protein (broad species distribution)
1772216_at	-0.276271	0.162986	-0.748806	0.309405	S. pombe SPAC19B12.08 /DEF=peptidase family C54
1776779_at	-0.166695	0.240335	-0.155737	0.060709	S. pombe SPAC19A8.10 /DEF=zinc finger protein
1779188_at	-0.475327	0.416614	-0.720563	0.662324	S. pombe SPAC1F7.12 /GEN=yakC /DEF=aldoketo reductase
1779707_at	0.152114	-0.170781	0.160331	0.0129887	S. pombe SPBC215.04 /GEN=git11 /DEF=heterotrimeric G protein (gamma subunit) (PMID 11238401)
1769754_at	-0.376485	0.675953	-1.4061	0.0513709	S. pombe SPAC32A11.02c /DEF=hypothetical protein
1773310_at	-0.187505	0.174986	-0.148475	0.178617	S. pombe SPCC594.04c /DEF=conserved protein (mainly bacteria and plants)
1772715_at	-0.413379	0.748778	-0.735667	0.281833	S. pombe SPAC5H10.02c /DEF=conserved fungal protein
1774044_at	-0.0774984	-0.251096	0.490726	0.074371	S. pombe SPBPB2B2.10c /DEF=galactose-1-phosphate uridylyltransferase (predicted)
1776730_at	-0.206512	-0.386229	0.0421365	0.889208	S. pombe SPAC21E11.04 /GEN=ppr1 /DEF=L-azetidine-2-carboxylic acid acetyltransferase (PMID 12761200)
1769926_at	0.0596479	0.0467548	-0.0616124	-0.106585	S. pombe SPBC776.02c /GEN=dis2 /DEF=PP1
1779386_at	-0.376276	0.301275	-0.700074	0.428469	S. pombe SPCC4G3.03 /DEF=WD repeat protein
1778264_at	-0.0923729	0.00952975	0.0446361	0.0801236	S. pombe SPBC16A3.19 /DEF=conserved eukaryotic protein
1769899_at	-0.0674016	0.112659	-0.0519597	0.0813163	S. pombe SPAC688.10 /GEN=rev3 /DEF=DNA polymerase zeta (catalytic subunit)
1776511_at	-0.563139	1.14292	-1.90916	0.189435	S. pombe SPAC4H3.03c /DEF=conserved protein (mainly bacterial)
1776911_at	-0.0171172	-0.0184377	0.0682885	-0.0367896	S. pombe SPAC343.18 /DEF=zinc finger protein
1773163_at	0.0891841	-1.15385	0.215496	1.66463	S. pombe SPBC1271.07c /DEF=N-acetyltransferase (predicted)
1773373_at	-0.0201317	0.02679	-0.145618	0.0339711	S. pombe SPBC725.11c /GEN=php2 /DEF=CCAAT-box binding factor complex (PMID 1899284)
1774581_at	0.112446	0.455796	-0.399835	-0.123007	S. pombe SPBC3B8.10c /DEF=NLI interacting factor family
1771754_at	-0.202247	1.89569	-0.760927	0.116763	S. pombe SPBC1773.06c /DEF=alcohol dehydrogenase (predicted)
1770325_at	-0.213795	0.835892	0.044776	-0.131542	S. pombe SPBC947.09 /DEF=conserved fungal protein
1775843_at	-0.193305	0.513251	-0.989872	-0.100177	S. pombe SPCC338.18 /DEF=sequence orphan
1769351_at	0.000347773	0.161165	-0.253062	0.00345167	S. pombe SPAC4F10.20 /GEN=grx1 /DEF=arsenate reductase (glutaredoxin) activity
1778933_at	-0.0695569	0.137616	-0.483527	0.262381	S. pombe SPBC365.20c /DEF=pyrazinamidasenicotinamidase (predicted)
1778338_at	-0.223492	0.106283	-0.345492	0.133455	S. pombe SPCC1739.04c /DEF=exosome (RNase complex) (ISS)
1776661_at	-0.0855834	0.0597232	-0.997657	0.306719	S. pombe SPAC14C4.01c /DEF=sequence orphan
1775063_at	0.331475	-0.0818691	0.111354	-0.315573	S. pombe SPAC29B12.06c /GEN=rcd1 /DEF=RNA-binding protein (PMID 9671458)
1780171_at	-0.00411479	-0.123488	0.0219758	0.00576655	S. pombe SPAC13C5.07 /GEN=rad32 /DEF=exonuclease
1776026_at	-0.221133	0.137576	-1.21962	0.328658	S. pombe SPBC119.03 /DEF=S-adenosylmethionine-dependent methyltransferase activity (predicted)
1773485_at	-0.0532522	0.165705	-0.179425	-0.00715669	S. pombe SPBC887.04c /GEN=lub1 /DEF=WD repeat protein
1776105_at	-0.0505231	0.000736554	0.0240024	-0.00532055	S. pombe SPBC776.18c /GEN=pmh1 /DEF=transcription initiation factor activity
1779721_at	-0.250112	0.0292323	0.0413704	0.0122623	S. pombe SPBC1703.04 /GEN=mlh1 /DEF=MutL family
1778388_at	1.97093e-05	-0.0357008	0.0705331	0.00231044	S. pombe SPAC6F12.02 /GEN=rst2 /DEF=transcription factor
1770046_at	-0.264564	0.305989	-0.292137	0.135791	S. pombe SPAC11E3.14 /DEF=conserved fungal protein
1771343_at	-0.0535889	0.00295893	0.022927	0.0197671	S. pombe SPAC17G6.04c /GEN=cpp1 /DEF=protein farnesyltransferase (beta subunit) (PMID 10617635)
1778553_at	-0.00499853	0.0115884	0.0417531	-0.0362002	S. pombe SPCC1682.07 /GEN=ssl1 /DEF=transcription factor
1773042_at	0.0330566	0.10566	-0.0057176	0.0337429	S. pombe SPAC167.01 /DEF=serinethreonine protein kinase (predicted)
1776682_at	0.15332	-0.5764	0.226356	-0.0853163	S. pombe SPBC32F12.15 /DEF=conserved eukaryotic protein
1778755_at	0.0386359	0.008008	-0.0224009	-0.0415812	S. pombe SPAC630.14c /GEN=tup1 /DEF=transcriptional co-repressor activity (PMID 10567571)
1777798_at	-0.0046463	0.152738	-0.595747	-0.0388387	S. pombe SPCC576.04 /DEF=hypothetical protein
1771684_at	-0.096474	0.256027	-0.431853	-0.016758	S. pombe SPBC215.05 /GEN=gpd1 /DEF=glycerol-3-phosphate dehydrogenase
1770291_at	-0.371057	0.250845	-0.95895	0.234751	S. pombe SPAC2C4.17c /DEF=MS ion channel
1769492_at	0.110486	0.16521	-0.227859	-0.194966	S. pombe SPAC17A5.10 /DEF=conserved fungal protein
1771035_at	-0.63437	0.356693	-1.69529	0.0923602	S. pombe SPBC725.10 /DEF=similar to peripheral-type benzodiazepine receptor
1772585_at	0.343524	-0.232743	0.104816	-0.0398216	S. pombe SPAC1F8.05 /GEN=isp3 /DEF=involved in sexual differentiation
1780142_at	-0.618069	0.29083	-1.1462	0.393988	S. pombe SPBC16A3.02c /DEF=quinone oxidoreductase (predicted)
1775488_at	0.018247	-0.0361061	0.0308615	-0.0349299	S. pombe SPAC14C4.02c /GEN=spr18 /DEF=SMC family (PMID 10747036)
1777615_at	0.25558	0.116341	-0.246007	-0.117977	S. pombe SPAC13A11.03 /DEF=involved in homologous chromosome pairing at meiosis (predicted) (PMID 11940665)
1778584_at	-0.116311	0.0898746	0.154119	-0.143202	S. pombe SPCC663.12 /GEN=cid12 /DEF=cid1-related
1776431_at	0.029912	0.586219	-0.532597	-0.0328585	S. pombe SPBC21C3.19 /DEF=conserved fungal protein
1776141_at	-0.613249	0.596392	-1.78988	0.0322847	S. pombe SPBC365.12c /GEN=ish1 /DEF=involved in response to stress (PMID 11751918)
1772266_at	-0.54556	0.749997	-1.158	0.225513	S. pombe SPAC2F3.05c /DEF=aldoketo reductase
1771016_at	-0.405511	0.0351798	-0.191641	0.044219	S. pombe SPAC9E9.09c /DEF=aldehyde dehydrogenase (predicted)
1770446_at	-0.226528	0.0973609	-0.645531	0.0899944	S. pombe SPAC4G9.11c /GEN=cmb1 /DEF=HMG box
1774216_at	-0.370532	0.173297	-0.666722	0.966972	S. pombe SPAC11D3.17 /DEF=zinc finger protein
1773201_at	0.0745096	-0.130198	0.285816	-0.238243	S. pombe SPAC3C7.03c /GEN=rhp55 /DEF=RecA family
1778528_at	-0.424419	0.093936	-0.588038	0.536857	S. pombe SPAC6G9.16c /DEF=sequence orphan
1776121_at	-0.245352	0.151057	-0.413752	0.0836808	S. pombe SPCC61.03 /DEF=conserved protein (broad species distribution)
1774579_at	0.130055	0.405761	-0.435786	-0.0120948	S. pombe SPAC328.03 /GEN=tps1 /DEF=alpha,alpha-trehalose-phosphate synthase (UDP-forming)
1778836_at	0.000881831	-0.071208	0.245822	-0.0945539	S. pombe SPAC29B12.10c /DEF=OPT family oligopeptide transporter
1777861_at	-0.472558	0.293972	-0.904198	0.098182	S. pombe SPCC16A11.08 /DEF=PX domain
1779523_at	-0.206461	0.113083	-0.34098	0.216321	S. pombe SPAC19G12.02c /GEN=pms1 /DEF=involved in DNA repair (PMID 9258673)
1771883_at	-0.00967566	0.0760514	0.0273555	-0.0105807	S. pombe SPAC23C11.04c /GEN=pnk1 /DEF=DNA kinasephosphatase (PMID 11729194)
1774036_at	0.247696	-0.0586917	0.0199159	-0.153509	S. pombe SPAC13G6.01c /GEN=rad8 /DEF=zinc finger protein
1776396_at	-0.273281	0.253162	-0.208951	0.360023	S. pombe SPAC22G7.08 /DEF=serinethreonine protein kinase (predicted)
1774731_at	0.162749	0.302196	-0.320251	-0.181731	S. pombe SPBC29B5.02c /GEN=isp4 /DEF=involved in sexual differentiation (PMID 7954893)
1770946_at	-0.294179	-0.714354	0.222808	1.46866	S. pombe SPCC70.08c /DEF=SAM dependent methyltransferase
1778636_at	-0.0993061	-0.0523901	-0.0374619	0.135319	S. pombe SPAC6F6.09 /DEF=conserved eukaryotic protein
1775929_at	0.016221	0.131967	-0.170911	-0.032272	S. pombe SPAC17A5.06 /GEN=ercc3sp /DEF=DEADDEAH box helicase
1770944_at	-0.158029	-0.390157	0.225087	2.28682	S. pombe SPBC1271.08c /DEF=hypothetical protein
1772096_at	-0.137035	0.198982	-0.206224	0.188891	S. pombe SPBC409.05 /GEN=skp1 /DEF=SCF ubiquitin ligase complex (PMID 9990507)
1777904_at	-0.0662921	0.121363	-0.00609334	-0.0114206	S. pombe SPBC15D4.03 /GEN=slm9 /DEF=WD repeat protein
1770029_at	-0.0119797	0.0971355	-0.305744	0.170959	S. pombe SPAC8C9.16c /DEF=conserved eukaryotic family
1774046_at	-0.544511	0.295554	-0.672171	0.289738	S. pombe SPAPB24D3.04c /GEN=mag1 /DEF=DNA-3-methyladenine glycosylase (PMID 8921872)
1775100_at	-0.131374	0.150335	-0.222283	0.0883382	S. pombe SPBC1778.02 /GEN=rap1 /DEF=involved in telomere maintenance
1779878_at	-0.0506814	-0.0613737	-0.0956132	0.803051	S. pombe SPAC11D3.05 /DEF=unknown specificity
1774233_at	0.30343	-0.235993	0.957382	-0.0733398	S. pombe SPAC1250.04c /DEF=DNA methyltransferase (predicted)
1778210_at	-0.242655	0.412993	-0.762587	0.0144965	S. pombe SPBC30D10.14 /DEF=dienelactone hydrolase family
1771371_at	-0.219532	0.0912463	-0.397763	0.364148	S. pombe SPAC16C9.01c /DEF=pfkB family carbohydrate kinase
1772713_at	-0.0277596	0.229694	-0.298953	-0.0460199	S. pombe SPBC25B2.10 /DEF=Usp (universal stress protein) domain
1774038_at	0.160015	0.0155395	-0.147916	-0.264914	S. pombe SPAC7D4.04 /GEN=taf1 /DEF=involved in response to nitrogen starvation (required) (PMID 11270572)
1778069_at	-0.0452512	0.0366745	-0.0097243	0.0905444	S. pombe SPBC11B10.09 /GEN=cdc2 /DEF=serinethreonine protein kinase
1771600_at	-0.0946515	0.0750853	-0.2262	0.0213076	S. pombe SPBC12C2.04 /DEF=dehydrogenase (predicted)
1770873_at	0.184812	0.358505	-0.179457	-0.0426626	S. pombe SPBC725.02 /GEN=mpr1 /DEF=speedy
1780108_at	-0.331199	0.402484	-0.850346	-0.0262804	S. pombe SPBC16D10.08c /DEF=AAA family ATPase
1774106_at	0.101957	0.251217	-0.0923154	-0.380973	S. pombe SPAC26A3.02 /GEN=myh1 /DEF=MutY family
1774921_at	0.61552	-0.371646	-0.0204641	-0.0829841	S. pombe SPBPB2B2.02 /DEF=hypothetical protein
1777378_at	-0.319661	-0.221371	0.177213	0.17144	S. pombe SPAC688.06c /GEN=slx4 /DEF=stucture-specific endonuclease (contributes_to) (PMID 14528010)
1769787_at	-0.155486	0.192559	-0.263746	0.147468	S. pombe SPBC577.13 /DEF=inositol polyphosphate phosphatase
1771852_at	-0.312087	0.185081	-0.429474	0.137357	S. pombe SPBC12C2.12c /GEN=glo1 /DEF=glyoxalase I (PMID 15042280)
1770187_at	0.0834169	0.566478	-0.103805	-0.169392	S. pombe SPAPB1A11.03 /DEF=FMN dependent dehydrogenase
1779814_at	-0.0341616	0.239403	-0.470956	-0.0325063	S. pombe SPAC328.07c /DEF=involved in metal homeostasis (predicted)
1778976_at	0.291792	2.48407	-1.15129	-0.043155	S. pombe SPAC139.05 /DEF=succinate semialdehyde dehydrogenase (predicted)
1774734_at	0.0133845	0.00640138	-0.00152747	-0.0104831	S. pombe SPBC1709.05 /GEN=sks2 /DEF=heat shock protein 70 family (PMID 8973306)
1777992_at	0.269304	-0.14962	0.57683	-0.272497	S. pombe SPCC1739.07 /DEF=substrate-specific nuclear cofactor for exosome activity (predicted)
1771879_at	0.0529499	0.0170816	-0.0273498	-0.0993837	S. pombe SPCC1753.01c /GEN=ssb2 /DEF=DNA replication factor A complex (subunit 2) (PMID 8702843)
1778549_at	-0.037962	-0.179201	0.0847028	0.416656	S. pombe SPCC550.10 /GEN=meu8 /DEF=betaine aldehyde dehydrogenase (predicted)
1774809_at	0.0676492	0.12636	-0.0153917	-0.188202	S. pombe SPAC3H8.09c /DEF=RNA-binding protein
1780222_at	0.185109	-0.441882	-1.01214	0.110421	S. pombe SPBPB2B2.12c /DEF=bifunctional enzyme
1777930_at	-0.0515772	-0.230543	0.0266097	0.123465	S. pombe SPAPB2B4.02 /GEN=grx4 /DEF=PICOT domain
1769947_at	0.0413424	0.00510184	0.0434297	-0.114649	S. pombe SPBC336.04 /GEN=cdc6 /DEF=DNA polymerase delta (catalytic subunit) (PMID 1960723)
1774385_at	-0.241751	0.12188	-0.290021	0.330043	S. pombe SPCC320.05 /DEF=sulfate transporter (predicted)
1772453_at	0.0548668	0.491979	0.0470839	-0.085522	S. pombe SPCC576.17c /DEF=transporter
1778669_at	0.169946	-0.0370242	0.0448987	-0.289084	S. pombe SPBC1685.11 /DEF=involved in DNA repair (predicted)
1772290_at	-0.300174	0.172925	-0.408871	0.131268	S. pombe SPBP35G2.06c /GEN=nup131 /DEF=nucleoporin (PMID 11564755)
1774964_at	0.0811927	-0.157204	0.308842	-0.0580222	S. pombe SPBC20F10.04c /DEF=hypothetical protein
1779750_at	-0.0726484	0.20332	-0.141753	-0.0203931	S. pombe SPCC1442.07c /DEF=ubiquitin family protein
1778652_at	-0.337243	0.136888	-0.0869122	0.193626	S. pombe SPCC24B10.14c /DEF=sequence orphan
1777502_at	-0.563543	0.741688	-0.635592	0.557475	S. pombe SPAC513.06c /DEF=dihydrodiol dehydrogenase (predicted)
1772653_at	-0.0626224	0.431532	-0.412721	-0.0106433	S. pombe SPAC17G6.13 /GEN=slt1 /DEF=involved in response to drug
1776147_at	-0.614372	0.122915	-0.989152	0.149296	S. pombe SPAC25B8.13c /GEN=isp7 /DEF=2 OG-Fe(II) oxygenase superfamily
1772770_at	0.0535402	-0.131348	0.206827	-0.212618	S. pombe SPAC20G4.04c /GEN=hus1 /DEF=PCNA related protein
1776803_at	0.0581837	-0.119107	0.0953871	-0.0587266	S. pombe SPCC306.04c /GEN=set1 /DEF=SET1 complex (TAP) (PMID 12488447)
1777491_at	0.0433588	-0.0368738	0.0968761	-0.032273	S. pombe SPBC713.07c /DEF=vacuolar polyphosphatase (predicted)
1778048_at	-0.0962861	0.0211525	-0.0128841	0.0910044	S. pombe SPBC713.06 /GEN=adl1 /DEF=DNA ligase (predicted)
1770598_at	-0.103668	0.0598221	-0.0845817	0.0288359	S. pombe SPBC1711.12 /DEF=dipeptidyl peptidase (predicted)
1779040_at	-0.253476	0.152107	-0.790627	0.191121	S. pombe SPCC70.02c /GEN=inh1 /DEF=ATPase inhibitor
1772476_at	-0.192863	0.0902723	-0.379464	0.0811806	S. pombe SPBC16A3.09c /GEN=ufd1 /DEF=Cdc48-Ufd1-Npl4 complex component (putative)
1769673_at	2.28882e-05	0.00562668	-0.167634	0.00285244	S. pombe SPCC338.08 /DEF=sequence orphan
1778634_at	0.0370299	-0.061972	0.0666409	-0.0531333	S. pombe SPCC1183.06 /GEN=ung1 /DEF=uracil DNA N-glycosylase (PMID 12810074)
1776340_at	-0.0982119	0.114665	-0.364326	-0.00220839	S. pombe SPAC22H10.12c /GEN=gdi1 /DEF=GTPase activator activity
1771036_at	-0.425693	1.37647	-1.40289	-0.0237989	S. pombe SPCC757.03c /DEF=conserved fungal protein
1774448_at	-0.0442289	0.0526158	-0.187956	0.0294046	S. pombe SPAC637.13c /DEF=hypothetical protein
1770131_at	-0.166809	0.198887	-0.398888	0.0366338	S. pombe SPCC330.06c /GEN=pmp20 /DEF=peroxiredoxin
1776839_at	-0.0258118	0.00943088	0.0816005	0.00240167	S. pombe SPAC4H3.05 /GEN=srs2 /DEF=DNA helicase
1777868_at	-0.316058	0.184897	-0.710397	0.131445	S. pombe SPBC3B9.06c /DEF=involved in autophagy (predicted)
1771454_at	0.0457052	0.049524	-0.0432911	-0.17154	S. pombe SPAC22A12.15c /GEN=bip1 /DEF=BiP (PMID 1373379)
1769843_at	-0.0892235	-0.0652596	0.181554	-0.0195074	S. pombe SPAC139.06 /DEF=histone acetyltransferase (type B) (catalytic subunit) (predicted)
1771366_at	-0.0365473	0.0306362	0.0454124	-0.0450954	S. pombe SPCP31B10.05 /DEF=tyrosyl-DNA phosphodiesterase (predicted)
1774606_at	-0.110297	0.376505	-0.390238	0.0295849	S. pombe SPAC23D3.11 /DEF=1-acyl dihydroxyacetone phosphate reductase (predicted)
1776659_at	-0.0161133	-0.309852	0.0904379	-0.0699053	S. pombe SPAC4F10.04 /DEF=protein phosphatase type 2A, intrinsic regulator activity (predicted)
1779722_at	-0.297446	0.0062418	0.000284513	0.25127	S. pombe SPBC1683.08 /GEN=ght4 /DEF=hexose transporter (PMID 10735857)
1778807_at	0.0110785	0.134145	-0.0532853	0.0169843	S. pombe SPBC216.07c /GEN=tor2 /DEF=phosphatidylinositol kinase
1772490_at	-0.0949141	-0.191387	-1.13931	0.298131	S. pombe SPBC1198.14c /GEN=fbp1 /DEF=fructose-1,6-bisphosphatase (PMID 2157626)
1774712_at	0.0568752	0.0800107	-0.000928243	-0.270359	S. pombe SPAC1B3.03c /GEN=wis2 /DEF=cyclophilin
1771659_at	-0.263575	0.0716804	-0.190487	0.0543534	S. pombe SPAC227.03c /DEF=mitochondrial carrier
1774269_at	0.234954	-0.322714	0.00131512	-0.154754	S. pombe SPBC660.05 /DEF=hypothetical protein
1776888_at	-0.0136188	-0.0434554	0.166928	-0.0978829	S. pombe SPAC22A12.01c /GEN=pso2 /DEF=DNA binding (damaged DNA) (predicted)
1775469_at	-0.0339845	0.0630477	0.0070432	-0.00237052	S. pombe SPAC12G12.04 /GEN=mcp60 /DEF=heat shock protein 60
1779895_at	-0.0210886	0.0555232	0.0291557	-0.0269127	S. pombe SPAC4A8.03c /GEN=ptc4 /DEF=phosphoprotein phosphatase activity
1770976_at	-0.113681	0.0934019	-0.334223	0.112348	S. pombe SPAC3C7.14c /GEN=obr1 /DEF=flavodoxin
1774698_at	0.00120958	-0.0435098	0.0968068	-0.0271581	S. pombe SPBC83.14c /GEN=rfc5 /DEF=replication factor C complex (predicted)
1774398_at	-0.023152	0.0325788	0.00577672	-0.0839945	S. pombe SPCC830.05c /DEF=histone acetyltransferase complex (predicted)
1770019_at	0.0829191	0.110903	-0.349394	-0.0429424	S. pombe SPCC330.01c /GEN=rhp16 /DEF=DEADDEAH box helicase
1778447_at	-0.0525586	-0.0828298	-0.61322	0.161221	S. pombe SPAC1687.07 /DEF=conserved fungal protein
1777208_at	0.0550493	0.0749502	0.0264537	0.0424048	S. pombe SPBC23E6.02 /DEF=zinc finger protein
1776782_at	0.0233307	0.0637932	0.0141201	-0.107666	S. pombe SPAC23C4.18c /GEN=rad4 /DEF=DNA polymerase epsilon (predicted)
1776360_at	-0.06259	0.320972	-0.398523	-0.0109444	S. pombe SPCC364.02c /GEN=bis1 /DEF=involved in response to stress (PMID 11751918)
1776220_at	-0.182463	-0.151399	0.0406971	0.298696	S. pombe SPCC18B5.01c /GEN=bfr1 /DEF=ABC transporter family
1776681_at	0.0575107	0.0663875	-0.0755978	-0.0739072	S. pombe SPAC30D11.10 /GEN=rad22 /DEF=involved in DNA repair (PMID 8290356)
1775686_at	0.0393063	0.0354907	-0.117118	-0.101038	S. pombe SPBC29A10.05 /GEN=exo1 /DEF=exonuclease
1771595_at	-0.00195535	0.0180807	0.152732	-0.174789	S. pombe SPAPB1E7.06c /GEN=eme1 /DEF=endodeoxyribonuclease RUS activity (PMID 11741546)
1772746_at	0.160544	-0.141747	-0.0771109	0.0574363	S. pombe SPCC18B5.11c /GEN=cds1 /DEF=serinethreonine protein kinase
1779308_at	0.125642	-0.0701113	0.21531	-0.173653	S. pombe SPAC57A7.12 /DEF=heat shock protein 70 family
1774989_at	-0.606885	0.422795	-0.908396	0.512678	S. pombe SPBC1711.11 /DEF=PX domain
1778994_at	-0.0600611	0.167682	-0.160151	0.0624027	S. pombe SPBC577.08c /DEF=thioredoxin-like
1774077_at	-0.180138	-0.0192874	0.0284789	0.395305	S. pombe SPAC15E1.09 /GEN=grx2 /DEF=arsenate reductase (glutaredoxin) activity
1777788_at	-0.12731	0.0959012	-0.0328385	-0.0129032	S. pombe SPBC25B2.03 /DEF=glutaredoxin (inferred from context)
1774193_at	0.00397873	-0.0160259	0.0134808	0.136047	S. pombe SPCC338.05c /GEN=spm2 /DEF=ubiquitin conjugating enzyme
1769347_at	-0.394826	0.1457	-0.636759	0.239493	S. pombe SPCC1235.01 /DEF=glycoprotein (predicted)
1771877_at	0.162162	-0.00618903	0.212861	-0.081185	S. pombe SPBC119.14 /GEN=rti1 /DEF=DNA binding
1778294_at	0.00752417	-0.0265869	-0.0625782	0.0264359	S. pombe SPCC5E4.04 /GEN=cut1 /DEF=separin
1776737_at	-0.0200218	-0.0546529	-1.00681	0.0513776	S. pombe SPBC660.06 /DEF=hypothetical protein
1769334_at	-0.106863	0.280767	-0.511291	0.0577536	S. pombe SPBC11C11.06c /DEF=hypothetical protein
1772300_at	-0.103512	0.336452	-0.382208	0.0498352	S. pombe SPCC285.10c /DEF=hypothetical protein
1769437_at	0.116708	-0.23625	0.144839	-0.250049	S. pombe SPAC3H5.06c /GEN=pol1 /DEF=DNA polymerase alpha (catalytic subunit) (PMID 2034212)
1775017_at	-0.0498581	0.172454	-0.215991	0.0139119	S. pombe SPBC12C2.02c /GEN=ste16 /DEF=HR1 repeat
1771848_at	0.0103718	-0.0263834	-0.0202433	0.0135107	S. pombe SPAC328.04 /DEF=AAA family ATPase
1775348_at	0.00604947	-0.366323	-0.0602166	0.119541	S. pombe SPCC4B3.12 /DEF=SET domain
1775721_at	-0.312725	0.267152	-0.433664	0.24564	S. pombe SPBC216.03 /DEF=hypothetical protein
1775581_at	0.0459309	0.205104	-0.060744	-0.391955	S. pombe SPCC320.03 /DEF=transcriptional regulator (predicted)
1770822_at	0.0121651	-0.13216	0.347002	-0.0241639	S. pombe SPAC30.03c /DEF=translin-like protein
1776942_at	-0.0421813	0.288388	-0.320222	-0.0362781	S. pombe SPCC1494.03 /DEF=hypothetical protein
1774479_at	-0.216078	0.19569	-0.493212	0.126572	S. pombe SPBC2A9.02 /DEF=dyhydroflavanol-4-reductase (predicted)
1779781_at	0.752615	-0.478265	0.491417	-0.382708	S. pombe SPBPB2B2.13 /DEF=galactokinase (predicted)
1777279_at	-0.0333354	0.221373	-0.357874	-0.0133139	S. pombe SPAC19G12.15c /GEN=tpp1 /DEF=trehalose-6-phosphate phosphatase (PMID 11004189)
1773928_at	-0.0481577	0.0554069	-0.0657794	0.0323792	S. pombe SPBC660.16 /DEF=phosphogluconate dehydrogenase, decarboxylating (predicted)
1779250_at	-0.139741	0.259805	-0.414761	0.0950813	S. pombe SPAC167.05 /DEF=Usp (universal stress protein) domain
1779886_at	-0.14288	0.132331	-0.415952	0.0801077	S. pombe SPAC607.08c /DEF=conserved eukaryotic protein
1774217_at	0.0261494	0.0278568	-0.0163209	-0.276135	S. pombe SPCC550.13 /GEN=dfp1 /DEF=essential (PMID 10409743)
1769963_at	0.0275469	0.00184568	0.217829	-0.107587	S. pombe SPAC664.09 /DEF=gamma-glutamyltranspeptidase (PMID 15052323)
1776458_at	0.0380942	-0.0309925	-0.289668	0.0133816	S. pombe SPAC144.13c /GEN=srw1 /DEF=Cdk inhibitor
1772050_at	0.00560188	0.0180607	-0.00181707	-0.0705818	S. pombe SPAC926.04c /GEN=swo1 /DEF=chaperone activity
1773297_at	-0.0559031	0.0985085	-0.115783	0.0511936	S. pombe SPCC1183.05c /GEN=lig4 /DEF=DNA ligase
1771050_at	-0.112876	0.222205	-0.773317	0.0019935	S. pombe SPCC285.11 /DEF=UBX domain
1770422_at	0.328665	1.63448	-1.84294	-0.112835	S. pombe SPBC16E9.16c /DEF=pseudogene
1775865_at	-0.284035	0.0829248	-0.462329	0.453043	S. pombe SPBC16D10.05 /GEN=mok13 /DEF=a-1,3-glucan synthase
1774591_at	0.127092	-0.0127048	0.160071	-0.0645164	S. pombe SPAC1F3.09 /DEF=conserved protein
1771418_at	0.117117	0.0841166	0.0380583	-0.14279	S. pombe SPCC1259.13 /GEN=chk1 /DEF=serinethreonine protein kinase
1779437_at	0.144204	-0.369584	0.0882368	0.0525532	S. pombe SPAC343.20 /DEF=sequence orphan
1769532_at	-0.0290991	0.0638167	-0.183094	0.0838076	S. pombe SPBC428.16c /GEN=rhb1 /DEF=GTPase
1770819_at	-0.292899	0.237921	-0.425577	0.198685	S. pombe SPAC20G8.10c /DEF=involved in autophagy (predicted)
1777884_at	0.121373	0.0228179	-0.0279614	-0.169918	S. pombe SPBC354.10 /DEF=sequence orphan
1776986_at	0.0306629	-0.746969	0.510929	-0.00359885	S. pombe SPAC1F8.01 /GEN=ght3 /DEF=hexose transporter (PMID 10735857)
1772808_at	0.157831	0.370779	-0.946657	-0.00904655	S. pombe SPAC16A10.01 /DEF=conserved protein (mainly fungal and bacterial)
1769748_at	0.0149078	0.00602404	0.0587451	-0.0069472	S. pombe SPBC336.14c /DEF=serinethreonine protein kinase (predicted)
1770984_at	0.0411352	0.0677287	-0.0440642	-0.165644	S. pombe SPAC6B12.11 /DEF=involved in DNA replication (predicted)
1769724_at	-0.252067	0.189289	-0.473222	0.236432	S. pombe SPBC119.07 /DEF=serinethreonine protein kinase
1772077_at	-0.0385911	0.148259	-0.225815	0.0215693	S. pombe SPAC9E9.04 /DEF=conserved eukaryotic protein
1772150_at	-0.0681909	0.22137	-0.54128	0.000985781	S. pombe SPBC2F12.05c /DEF=involved in ergosterol biosynthesis (predicted)
1778846_at	0.0109193	-0.0731519	0.0181246	0.0148242	S. pombe SPBC11B10.06 /DEF=zinc finger protein
1777651_at	-0.596345	0.559464	-0.89531	0.3682	S. pombe SPCC965.06 /DEF=potassium channel subunit ??? (predicted)
1770842_at	0.0176595	0.0374956	-0.101562	-0.0578454	S. pombe SPAC1F5.06 /DEF=heat shock protein 70 family
1778904_at	-0.111409	0.0246906	-0.116441	0.104086	S. pombe SPAC6B12.02c /DEF=conserved fungal protein
1769842_at	-0.175907	0.0105801	0.0859747	0.0139459	S. pombe SPAC12G12.16c /DEF=XP-G family
1779384_at	0.0334889	0.0334412	0.0649687	0.00121975	S. pombe SPBC577.09 /DEF=WD repeat protein
1770356_at	0.292484	0.0464414	-0.0340335	-0.0840597	S. pombe SPCC63.14 /DEF=sequence orphan
1774047_at	-0.162096	-0.0211035	-0.0895586	0.56296	S. pombe SPAC11D3.09 /DEF=arginase family protein
1774524_at	-0.0455659	0.150829	-0.588495	-0.0185976	S. pombe SPBC4F6.06 /GEN=kin1 /DEF=serinethreonine protein kinase
1775711_at	-0.0982634	0.122048	-0.308075	0.164859	S. pombe SPCC1919.03c /DEF=5-amp-activated protein kinase beta subunit (predicted)
1770642_at	-0.216949	0.355798	-0.417628	0.222728	S. pombe SPCC1020.10 /GEN=oca2 /DEF=serinethreonine protein kinase (predicted)
1772276_at	-0.160321	0.234975	-0.292261	0.0814797	S. pombe SPBP4H10.16c /DEF=hypothetical protein
1778298_at	-0.447258	0.569982	-0.373275	0.389509	S. pombe SPBC1773.05c /GEN=tms1 /DEF=dehydrogenase (PMID 8223615)
1769631_at	0.0718629	0.0300115	0.00527541	-0.186593	S. pombe SPCC5E4.06 /GEN=rad18 /DEF=SMC family
1774024_at	-0.0295944	-0.107264	-0.0975386	0.0680288	S. pombe SPCC757.11c /DEF=transporter
1777895_at	0.19099	0.143958	-0.24369	-0.0398884	S. pombe SPCC4G3.10c /GEN=rhp42 /DEF=involved in DNA repair
1779495_at	0.115656	0.0777178	0.0199827	-0.053004	S. pombe SPCC285.16c /GEN=msh6 /DEF=MutS family
1776977_at	-0.364124	1.37517	-0.375922	0.366822	S. pombe SPAC22A12.17c /DEF=short chain dehydrogenase (predicted)
1775994_at	-0.0118364	0.0349312	-0.0700207	0.0137981	S. pombe SPAC18B11.07c /GEN=rhp6 /DEF=ubiquitin conjugating enzyme
1773509_at	0.0759951	3.30002	-1.98092	-0.0750535	S. pombe SPAC4H3.08 /DEF=short chain dehydrogenase (predicted)
1770770_at	-0.117306	0.0919466	-0.498818	0.269808	S. pombe SPAC27E2.05 /GEN=cdc1 /DEF=DNA polymerase delta (small subunit)
1778182_at	0.0862497	-0.258944	0.277258	-0.0885995	S. pombe SPAC644.14c /GEN=rhp51 /DEF=RecA family
1778072_at	-0.0869865	0.262237	-0.462878	0.0192931	S. pombe SPAC2C4.15c /DEF=UBX domain
1773818_at	-0.321953	0.232862	-0.454519	0.189112	S. pombe SPAC824.07 /DEF=hydroxyacylglutathione hydrolase (predicted)
1773554_at	-0.244318	0.288874	-0.358689	0.147076	S. pombe SPAC1F3.02c /GEN=mkh1 /DEF=MEK kinase (PMID 9199286)
1771653_at	-0.0750326	0.18323	0.0880527	-0.10759	S. pombe SPBC25B2.01 /DEF=GTP binding (predicted)
1773747_at	0.0559607	0.303317	-0.146027	-0.080574	S. pombe SPCC1919.04 /DEF=sequence orphan
1779362_at	-0.263941	0.394257	-1.07762	0.0348784	S. pombe SPCC622.15c /DEF=sequence orphan
1779757_at	-0.616255	0.718263	-1.24511	0.147055	S. pombe SPCC16A11.15c /DEF=sequence orphan
1778410_at	-0.0416562	0.0489295	0.013923	-0.0180915	S. pombe SPAC1A6.07 /DEF=proline-rich protein
1778062_at	-0.104753	0.127872	-0.424907	0.064023	S. pombe SPBC713.02c /GEN=ubp21 /DEF=ubiquitin C-terminal hydrolase activity
1776939_at	-0.457669	0.220414	-1.19173	0.302995	S. pombe SPCC338.12 /DEF=protease inhibitor (predicted)
1775950_at	0.0669133	-0.0400836	0.0995671	-0.342955	S. pombe SPBC609.05 /DEF=FACT complex component
1776995_at	0.120698	0.0836662	-0.159736	-0.136025	S. pombe SPAC23C4.12 /GEN=hhp2 /DEF=serinethreonine protein kinase (PMID 8026462)
1771228_at	-0.3625	0.388334	-2.1041	0.0465698	S. pombe SPAC23C11.06c /DEF=hypothetical protein
1773731_at	-0.204739	0.377286	-0.338008	0.1952	S. pombe SPAC1B3.20 /DEF=sequence orphan
1777813_at	-0.0640367	0.233962	-0.59852	-0.0542587	S. pombe SPBC14C8.01c /GEN=cut2 /DEF=securin
1776960_at	-0.215932	0.384026	-0.0412986	0.0184654	S. pombe SPAC19D5.01 /GEN=pyp2 /DEF=serinethreonine protein phosphatase
1772311_at	-0.192511	0.257048	-0.613926	0.0140753	S. pombe SPCC4F11.02 /GEN=ptc1 /DEF=serinethreonine protein phosphatase
1774862_at	-0.358721	0.0679537	-0.710388	0.229508	S. pombe SPBC211.07c /GEN=ubc8 /DEF=ubiquitin conjugating enzyme
1775675_at	0.0236785	0.0258884	-0.0112263	-0.0225811	S. pombe SPAC664.11 /GEN=ssc1 /DEF=heat shock protein 70 family (PMID 2123810)
1778461_at	-0.0228697	-0.00807254	0.138108	-0.0333471	S. pombe SPBC342.05 /GEN=crb2 /DEF=BRCT domain
1780231_at	0.0241254	-0.196534	0.334332	-0.0981658	S. pombe SPAC3G6.06c /GEN=rad2 /DEF=FEN-1 endonuclease
1778256_at	-0.226775	0.0652466	-0.41186	0.0735181	S. pombe SPAC25H1.03 /DEF=conserved eukaryotic protein
1778866_at	0.0790062	0.0830142	0.0405776	-0.158204	S. pombe SPCP25A2.02c /GEN=rhp26 /DEF=involved in nucleotide-excision repair
1777832_at	0.0458244	0.00504971	-0.00268459	-0.00437228	S. pombe SPAC821.10c /GEN=sod1 /DEF=Cu,Zn-superoxide dismutase (PMID 12073089)
1778631_at	0.483092	0.430347	-0.246701	-0.379087	S. pombe SPAC13F5.07c /DEF=dubious
1770283_at	-0.0994418	0.145189	0.0171601	0.219685	S. pombe SPAC23D3.05c /DEF=alcohol dehydrogenase pseudogene
1779580_at	-0.0284322	0.0888913	-0.286196	0.0209649	S. pombe SPBC3E7.01 /GEN=fab1 /DEF=1-phosphatidylinositol-3-phosphate 5-kinase activity (PMID 10567352)
1777296_at	-0.506239	0.227548	-0.9838	0.244777	S. pombe SPAC4A8.04 /GEN=isp6 /DEF=serine protease
1779989_at	0.0466334	0.254929	-0.202926	-0.00293191	S. pombe SPAC12B10.12c /GEN=rhp41 /DEF=involved in DNA repair (PMID 12807767)
1775229_at	0.136552	0.228189	-0.444921	0.0476484	S. pombe SPAC18G6.09c /DEF=serine-rich protein
1773578_at	-0.593007	0.856292	-0.829504	0.601737	S. pombe SPBC1604.01 /DEF=DUF323
1776192_at	0.565542	-0.471606	0.302597	-0.214826	S. pombe SPBC12D12.02c /GEN=cdm1 /DEF=DNA polymerase delta (subunit) (PMID 9326594)
1780043_at	-0.286925	0.311902	-0.56129	0.222425	S. pombe SPAC167.07c /DEF=ubiquitin-protein ligase (E3) (predicted)
1775379_at	-0.288459	0.085317	-0.195755	0.422448	S. pombe SPCC1450.13c /DEF=riboflavin synthase activity (PMID 14690539)
1776710_at	0.260958	-0.0203994	0.0507835	-0.454987	S. pombe SPBC409.07c /GEN=wis1 /DEF=serinethreonine protein kinase (PMID 1756736)
1778616_at	-0.0530268	-0.00321865	-0.295718	0.0124302	S. pombe SPBC29B5.01 /GEN=atf1 /DEF=transcription factor (PMID 8557039)
1769543_at	-0.572833	0.0830902	-0.456251	0.418592	S. pombe SPBC1347.11 /DEF=sequence orphan
1773193_at	-0.0714016	0.393724	-0.536769	0.013636	S. pombe SPCC24B10.02c /DEF=NADNADH kinase
1778070_at	-0.0221491	0.0646467	-0.212508	0.0541588	S. pombe SPCC23B6.01c /DEF=oxysterol binding protein (predicted)
1772040_at	-0.41744	-0.199528	0.319105	0.622978	S. pombe SPBC23G7.11 /DEF=DNA-3-methyladenine glycosidase
1777142_at	-0.299179	0.120996	-0.274911	0.177467	S. pombe SPAC29E6.05c /DEF=peptide methionine sulfoxide reductase (predicted)
1771198_at	0.0338008	0.453629	-0.494933	0.0284783	S. pombe SPAC22F3.02 /GEN=atf31 /DEF=transcription factor
1769636_at	0.0236088	0.192402	-0.167688	-0.024133	S. pombe SPBC776.09 /GEN=ste13 /DEF=DEADDEAH box helicase
1771201_at	-0.183673	0.113747	-0.306372	0.208496	S. pombe SPBC106.03 /DEF=hypothetical protein
1773733_at	-0.0572185	-0.280757	0.228122	0.0557165	S. pombe SPAC23C4.09c /DEF=DNA binding (double-stranded)
1769391_at	-0.342008	0.0613178	-0.701354	0.219542	S. pombe SPBC106.10 /GEN=pka1 /DEF=cAMP-dependent protein kinase (catalytic subunit) (PMID 8144551)
1770186_at	-0.0232458	0.0419753	-0.186536	-0.0257874	S. pombe SPBC1539.04 /DEF=hypothetical protein
1778517_at	-0.0613909	0.0266832	0.0173009	-0.00841586	S. pombe SPBC1734.02c /GEN=cdc27 /DEF=DNA polymerase delta (subunit)
1771043_at	-0.495146	0.422384	-1.01494	0.0511875	S. pombe SPAC22H12.01c /DEF=hypothetical protein
1771968_at	-0.546086	0.136761	-1.24593	0.461488	S. pombe SPAC167.06c /DEF=hypothetical protein
1770734_at	-0.168542	0.168542	-0.382034	0.0784877	S. pombe SPCC306.09c /GEN=cap1 /DEF=actin cortical patch component (predicted)
1770406_at	0.160953	0.543479	-0.303329	-0.512011	S. pombe SPAC3H1.11 /DEF=zinc finger protein
1772555_at	-0.251075	0.212605	-0.361724	0.146494	S. pombe SPBC543.03c /GEN=pku80 /DEF=Ku domain protein
1770181_at	-0.170871	0.461209	-0.472417	0.0774625	S. pombe SPAPB1E7.08c /DEF=membrane transporter
1779868_at	0.0962473	0.0984274	0.0444803	-0.299408	S. pombe SPAC25H1.02 /GEN=jmj1 /DEF=transcription factor
1779314_at	-0.133887	0.166232	-0.317355	0.00880464	S. pombe SPAC3H8.04 /DEF=hypothetical protein
1777594_at	0.232843	-0.117974	0.219533	-0.308587	S. pombe SPBC1734.06 /GEN=rhp18 /DEF=zinc finger protein
1777598_at	0.102813	-0.0261701	-0.0088768	-0.361484	S. pombe SPCC1223.11 /GEN=ptc2 /DEF=serinethreonine protein phosphatase (PMID 7874201)
1777195_at	-0.00362015	0.141946	-0.111365	0.0305681	S. pombe SPCC330.02 /DEF=leucine-rich repeat protein (predicted)
1769718_at	-0.0504144	-0.0273377	0.182271	-0.0342846	S. pombe SPBC4F6.15c /GEN=swi10 /DEF=endonuclease complex subunit (predicted)
1775129_at	-0.41668	0.449649	-1.13893	0.266502	S. pombe SPAPJ691.02 /DEF=zinc-binding protein (predicted)
1769739_at	0.0942577	0.00256252	0.521166	-0.297274	S. pombe SPAC27D7.11c /DEF=possibly S. pombe specific
1772886_at	-0.0624968	0.0626872	-0.325552	0.024004	S. pombe SPAC10F6.06 /GEN=vip1 /DEF=rrm RNA recognition motif
1774293_at	-0.0414788	7.66118e-05	-0.0637474	0.0723349	S. pombe SPAC212.04c /DEF=DUF999
1777560_at	0.0416489	0.192355	-0.231045	-0.0617084	S. pombe SPBC649.03 /GEN=rhp14 /DEF=XP-A family
1775111_at	-0.0274035	0.024368	0.242435	0.062795	S. pombe SPAC1071.02 /DEF=involved in DNA repair (predicted)
1780042_at	0.0603724	-0.0611407	-0.00547632	0.00151443	S. pombe SPBC16A3.14 /DEF=superoxide dismutase (predicted)
1772432_at	-0.037069	0.127793	-0.126805	0.019927	S. pombe SPCC4G3.05c /GEN=mus81 /DEF=endodeoxyribonuclease RUS activity (PMID 11741546)
1770991_at	-0.250211	0.441126	-0.691226	0.189197	S. pombe SPAC1952.13 /GEN=ned1 /DEF=nuclear elongation and deformation protein
1779130_at	0.0637608	-0.344577	0.0495237	-0.0561152	S. pombe SPCC622.08c /GEN=hta1 /DEF=histone H2A (alpha) (PMID 3018512)
1778643_at	-0.073307	-0.153828	0.169543	-0.203553	S. pombe SPAPYUG7.04c /GEN=rpb9 /DEF=DNA-directed RNA polymerase (II subunit) (PMID 9852944)
1772634_at	0.00482559	0.787249	-0.934747	-0.0213197	S. pombe SPCP31B10.06 /DEF=C2 domain
1775260_at	0.0599492	-0.0337779	0.0250463	0.0129582	S. pombe SPBP8B7.19 /DEF=FACT complex component
1773137_at	-0.133536	0.0428432	0.00371456	0.144914	S. pombe SPCC23B6.03c /GEN=tel1 /DEF=phosphotidylinositol kinase
1773933_at	-0.10404	0.313107	-0.518351	0.0847683	S. pombe SPAC20G4.02c /GEN=fus1 /DEF=formin
1778411_at	0.326971	0.878234	-1.03696	-0.0329599	S. pombe SPAC22F8.05 /DEF=alpha,alpha-trehalose-phosphate synthase (predicted)
1772415_at	-0.0348272	0.121116	-0.543653	-0.0159356	S. pombe SPAP8A3.04c /GEN=hsp9 /DEF=heat shock protein (PMID 8679693)
1777031_at	-0.0621812	0.2355	-0.943561	0.0293074	S. pombe SPBC428.10 /DEF=sequence orphan
1777082_at	0.511797	0.250948	-0.0175743	-0.38901	S. pombe SPBC1685.13 /DEF=involved in non-classical protein export pathway (predicted)
1779273_at	-0.103911	0.0825974	-0.51992	-0.0214729	S. pombe SPBC32F12.03c /GEN=gpx1 /DEF=glutathione peroxidase (PMID 10455235)
1777880_at	-0.0637013	0.0166095	-0.0757329	0.0150684	S. pombe SPCC576.03c /DEF=thioredoxin peroxidase
1778026_at	0.0533091	-0.0362987	0.0931695	-0.145949	S. pombe SPAC1B1.04c /DEF=poly A specific ribonuclease subunit (predicted)
1771560_at	0.13691	0.0310389	-0.698104	0.0703999	S. pombe SPAC8C9.03 /GEN=cgs1 /DEF=cAMP-dependent protein kinase (regulatory subunit)
1777684_at	-0.100481	0.522649	-0.263002	-0.0257724	S. pombe SPBC3H7.02 /DEF=sulfate transporter activity (predicted)
1779258_at	-0.0647214	0.164678	-0.609342	0.131825	S. pombe SPAC21E11.03c /GEN=pcr1 /DEF=transcription factor (PMID 8557039)
1778427_at	-0.0198132	-0.00717386	0.0925808	-0.0406411	S. pombe SPBC13G1.13 /GEN=tfb2 /DEF=transcription factor TFIIH complex (PMID 14534314)
1772818_at	0.96944	2.31146	-0.373684	-0.0605996	S. pombe SPACUNK4.17 /DEF=dehydrogenase (predicted)
1779059_at	-0.0183372	0.0589002	-0.428034	-0.0509764	S. pombe SPBC3E7.08c /GEN=rad13 /DEF=DNA repair nuclease
1779264_at	0.0941521	-0.0899725	0.0328547	-0.12544	S. pombe SPBC3H7.15 /GEN=hhp1 /DEF=serinethreonine protein kinase
1775086_at	0.0276537	0.419558	-0.426745	0.167732	S. pombe SPBC557.05 /DEF=arrestin family
1773803_at	0.0290972	0.00607332	0.158677	-0.0417973	S. pombe SPBC1778.10c /DEF=phosphoinositide-dependent protein kinase 1 (predicted)
1777848_at	-0.2835	0.381887	-0.832158	0.00359503	S. pombe SPBC2D10.05 /GEN=exg3 /DEF=glucan 1,3-beta-glucosidase
1776733_at	0.0639114	-0.191142	0.0614065	0.0264289	S. pombe SPAC17G8.07 /DEF=involved in transcriptional regulation
1779103_at	0.0766271	0.109296	-0.158092	-0.00934696	S. pombe SPAC23C4.05c /DEF=hypothetical protein
1774751_at	-0.0964193	0.156334	-0.4636	0.445772	S. pombe SPAC1B3.06c /DEF=methyltransferase (predicted)
1772160_at	-0.302558	0.160712	-1.04886	0.146681	S. pombe SPAC688.04c /GEN=gst3 /DEF=glutathione S-transferase (PMID 12151111)
1773294_at	-0.264489	0.316003	-0.98237	0.00627359	S. pombe SPBC660.07 /GEN=ntp1 /DEF=O-glycosyl hydrolase
1777398_at	0.802835	1.0052	-0.550089	-0.857606	S. pombe SPAC343.12 /GEN=rds1 /DEF=involved in response to stress
1780208_at	-0.559872	0.0533555	0.105249	0.275803	S. pombe SPCC569.05c /DEF=unknown specificity
1778843_at	-0.278719	0.190745	-0.461625	0.0509202	S. pombe SPBC1D7.05 /GEN=byr2 /DEF=serinethreonine protein kinase
1770719_at	0.0980581	0.13877	-0.179795	-0.170658	S. pombe SPAC26A3.16 /GEN=dph1 /DEF=ubiquitin family protein
1773940_at	0.160714	-0.0885668	-0.227076	0.0251341	S. pombe SPBC649.04 /GEN=uvi15 /DEF=involved in stress response (required)
1773338_at	0.109937	-0.0344108	0.0588055	-0.0425313	S. pombe SPBC1718.01 /GEN=pop1 /DEF=F-box protein
1778513_at	0.329785	-0.0799115	0.141879	-0.000339508	S. pombe SPBC1105.13c /DEF=hypothetical protein
1774552_at	-0.0426283	0.0467962	-0.0659192	0.0944068	S. pombe SPAC11E3.04c /GEN=ubc13 /DEF=ubiquitin conjugating enzyme
1772115_at	-0.160591	0.0666831	-0.0567026	0.0211439	S. pombe SPAC17C9.08 /GEN=pnu1 /DEF=endonuclease activity
1778379_at	-0.168343	0.563315	-0.15199	0.214192	S. pombe SPAC11D3.01c /DEF=conserved fungal protein
1769867_at	0.0120551	0.0797342	-0.0171324	0.0121619	S. pombe SPAC607.09c /GEN=btn1 /DEF=battenin family protein
1773570_at	-0.17072	0.27572	-0.616638	0.0855192	S. pombe SPBC1734.08 /DEF=STAM like protein
1774679_at	0.0963558	-0.693915	-0.683329	1.25402	S. pombe SPCC330.03c /DEF=cytochrome b5 family
1776548_at	-1.20839	-0.792187	1.03293	2.68405	S. pombe SPBC23G7.10c /DEF=NADH-dependent flavin oxidoreductase (predicted)
1774099_at	-0.328552	0.263136	-0.408947	0.257178	S. pombe SPCC306.08c /DEF=malate dehydrogenase (predicted)
1778484_at	-0.228771	0.31832	-0.499797	0.750839	S. pombe SPAC27F1.05c /DEF=aminotransferase (predicted)
1776873_at	-0.0737505	0.83563	-0.680351	-0.0758972	S. pombe SPAC13G7.02c /GEN=ssa1 /DEF=heat shock protein 70 family
1776040_at	0.0221354	-0.161465	0.444219	-0.00819111	S. pombe SPCC550.05 /GEN=nse1 /DEF=Smc5-6 complex (PMID 12966087)
1778698_at	-0.112806	0.0322692	-0.35446	0.118058	S. pombe SPCC962.01 /DEF=C2 domain
1771616_at	0.0893215	-0.0889505	0.218334	-0.0696166	S. pombe SPAC20G8.01 /GEN=cdc17 /DEF=DNA ligase
1773817_at	-0.0438271	0.0612615	-0.130516	0.105052	S. pombe SPAC56F8.16 /GEN=esc1 /DEF=transcription factor (predicted)
1770585_at	0.0914316	0.194653	-0.267787	0.119977	S. pombe SPCC1322.08 /GEN=srk1 /DEF=MAPK-activated protein kinase
1777323_at	0.0118742	-0.162198	0.11391	0.0225242	S. pombe SPBC16E9.15 /DEF=small protein conserved in human and D. melanogaster
1772495_at	-0.374012	0.404293	-0.979171	0.191935	S. pombe SPAC4F10.07c /DEF=localization nucleolus (GFP)
1778942_at	0.0188335	0.0305815	-0.0155226	0.0557858	S. pombe SPBC28F2.07 /GEN=sfr1 /DEF=involved in DNA repair (PMID 14663140)
1773517_at	-0.220735	0.449896	-0.781665	0.104799	S. pombe SPAC2C4.07c /DEF=ribonuclease II (RNB) family
1771194_at	0.0865723	0.00853316	0.0356671	-0.247357	S. pombe SPBC18H10.19 /DEF=conserved eukaryotic protein
1777538_at	-0.221665	0.424711	-0.38354	0.194532	S. pombe SPCC1281.04 /DEF=pyridoxal reductase (predicted)
1778628_at	0.464518	0.728372	-0.0446323	-0.424576	S. pombe SPCC1223.03c /GEN=gut2 /DEF=glycerol-3-phosphate dehydrogenase
1769733_at	0.129878	-0.0339228	0.0973781	-0.229707	S. pombe SPAC9E9.08 /GEN=rad26 /DEF=involved in DNA repair
1770903_at	-0.223682	0.141987	-0.328998	0.1668	S. pombe SPBC6B1.09c /GEN=nbs1 /DEF=FHA domain (phosphopeptide binding)
1769902_at	0.105554	0.0923258	-0.133971	-0.108432	S. pombe SPCC1450.01c /DEF=pseudogene
1778118_at	-0.131561	0.0973657	-0.352309	0.0286551	S. pombe SPAC22F3.13 /GEN=tsc1 /DEF=hamartin
1778415_at	-0.327521	0.295332	-0.314667	0.500255	S. pombe SPCC18.09c /DEF=hypothetical protein
1777179_at	-0.237761	0.384552	-0.974559	0.0427586	S. pombe SPCC757.07c /GEN=ctt1 /DEF=catalase
1774630_at	-0.142077	-0.0114594	-0.0155233	0.0517871	S. pombe SPBC16D10.04c /GEN=dna2 /DEF=DNA helicase
1776301_at	-0.130244	0.273124	-0.380394	0.0807905	S. pombe SPAC1486.01 /DEF=manganese superoxide dismutase (AF069292) (predicted)
1779325_at	-0.0825033	0.180288	-0.475776	-0.0225086	S. pombe SPCC16A11.01 /DEF=conserved fungal protein
1773387_at	-0.367573	0.0695508	-0.400962	0.852856	S. pombe SPAC17G6.03 /DEF=calcineurin-like phosphoesterase (predicted)

## Sheet: Significant by Genotype (DMSO)
Probe Set ID	[set3D, DMSO]	[set3D, LatA]	[Wild Type, DMSO]	[Wild type, LatA]	Target Description
1771300_at	-2.12692	-2.73436	2.48923	2.84896	S. pombe SPAC513.03 /GEN=mfm2 /DEF=M-factor precursor (PMID 8196631)
1775321_at	-2.28818	-2.25707	2.03882	2.23663	S. pombe SPAC22E12.11c /DEF=transcription factor
1772987_at	-1.82707	-1.57218	1.70758	1.98157	S. pombe SPAC186.05c /DEF=hypothetical protein

## Sheet: Significant by Genotype (LatA)
Probe Set ID	[set3D, DMSO]	[set3D, LatA]	[Wild Type, DMSO]	[Wild type, LatA]	Target Description
1771242_at	0.266081	0.596198	0.0301444	-0.34886	S. pombe SPAC2H10.01 /DEF=involved in transcriptional regulation
1775700_at	0.140415	-0.773258	-0.185177	0.317923	S. pombe SPBPB8B6.03 /DEF=acetamidase (predicted)
1777852_s_at	-0.264566	-0.601736	0.463414	0.051788	S. pombe SPAC977.06 /DEF=DUF999
1772011_s_at	-0.110463	-0.94006	0.252591	-0.0232503	S. pombe SPBPB10D8.07c /DEF=malate permease (predicted)
1779064_at	-0.018364	0.69267	-0.0325394	-0.180632	S. pombe SPAC23C11.10 /DEF=conserved eukaryotic protein
1769316_s_at	-0.0336192	-0.425156	0.170469	1.07126	S. pombe SPAC750.05c /DEF=telomeric duplication
1773133_at	-0.29943	1.45059	-1.25989	0.122298	S. pombe SPAC27D7.09c /DEF=predicted N-terminal signal sequence
1778258_at	-0.456174	0.909195	-0.823407	0.229472	S. pombe SPAC13C5.04 /DEF=glutamine amidotransferase (predicted)
1777741_at	-0.281109	-0.367021	0.266036	0.709593	S. pombe SPCC965.12 /DEF=dipeptidase (predicted)
1772155_at	0.239922	0.153831	0.115051	-0.556084	S. pombe SPAC11D3.13 /DEF=ThiJ domain
1769393_at	0.129509	-0.18492	-0.559401	0.711282	S. pombe SPAC1039.07c /DEF=aminotransferase class-III pyridoxal-phosphate
1769838_at	0.242615	2.46251	-0.767653	-0.0357424	S. pombe SPBC24C6.09c /DEF=phosphoketolase (predicted)
1776795_at	0.708228	2.02533	-1.94046	-0.17553	S. pombe SPAC23H3.15c /DEF=serine-rich protein
1771297_at	-0.12223	-0.745562	0.321763	0.416416	S. pombe SPAC11H11.04 /GEN=mam2 /DEF=pheromone p-factor receptor (PMID 1657593)
1778699_at	0.0567487	0.190836	-0.0116723	-0.527066	S. pombe SPBP4H10.14c /DEF=sequence orphan
1774586_s_at	0.0711152	-0.589441	-0.0716588	1.62429	S. pombe SPAC977.04 /DEF=pseudogene
1776038_at	-0.0808423	0.709028	-0.0645939	-0.0812833	S. pombe SPBP8B7.05c /DEF=carbonic anhydrase family
1769734_s_at	0.00303682	-0.140972	-0.129261	0.564554	S. pombe SPAC186.03 /DEF=L-asparaginase
1779588_at	-0.11526	-0.568032	0.921322	0.039058	S. pombe SPAC513.04 /DEF=dubious
1771300_at	-2.12692	-2.73436	2.48923	2.84896	S. pombe SPAC513.03 /GEN=mfm2 /DEF=M-factor precursor (PMID 8196631)
1777159_s_at	0.208541	-0.917442	1.09569	0.056252	S. pombe SPBPB2B2.07c /DEF=DUF999
1775321_at	-2.28818	-2.25707	2.03882	2.23663	S. pombe SPAC22E12.11c /DEF=transcription factor
1774951_at	0.230256	0.298995	-0.154617	-0.311408	S. pombe SPBC106.11c /DEF=phospholipase A2 (predicted)
1770470_s_at	-0.018062	-0.654255	0.0311546	0.365774	S. pombe SPAC977.09c /DEF=lysophospholipase (putative)
1776847_at	-0.170228	-0.548788	0.295563	0.0928144	S. pombe SPAC22F3.03c /GEN=rdh54 /DEF=DEADDEAH box helicase (PMID 14551247)
1776487_at	-0.779015	1.50222	-1.3985	0.293634	S. pombe SPAC513.02 /DEF=phosphoglycerate mutase family
1777407_at	-0.118886	-0.148585	0.120469	0.750093	S. pombe SPCC965.11c /DEF=amino acid transporter (predicted)
1774336_at	-0.170689	0.287692	-0.0527458	-0.665462	S. pombe SPBC947.04 /DEF=glycoprotein (predicted)
1773163_at	0.0891841	-1.15385	0.215496	1.66463	S. pombe SPBC1271.07c /DEF=N-acetyltransferase (predicted)
1771754_at	-0.202247	1.89569	-0.760927	0.116763	S. pombe SPBC1773.06c /DEF=alcohol dehydrogenase (predicted)
1769920_at	-0.0605822	-0.0688273	-0.327634	0.529958	S. pombe SPCC320.14 /DEF=threo-3-hydroxyaspartate ammonia-lyase (predicted)
1776431_at	0.029912	0.586219	-0.532597	-0.0328585	S. pombe SPBC21C3.19 /DEF=conserved fungal protein
1770158_at	0.0640221	-0.351777	0.037577	0.548586	S. pombe SPBC14C8.05c /GEN=meu17 /DEF=glucoamylase
1774518_at	0.00614166	-0.0408481	-0.102561	0.999163	S. pombe SPAC922.03 /DEF=1-aminocyclopropane-1-carboxylate deaminase (predicted)
1770076_at	-0.290865	-0.283674	0.2345	0.342735	S. pombe SPAC1B3.04c /DEF=GTP binding
1779878_at	-0.0506814	-0.0613737	-0.0956132	0.803051	S. pombe SPAC11D3.05 /DEF=unknown specificity
1777252_at	-0.117998	-0.223481	0.657215	0.53867	S. pombe SPBC25B2.02c /GEN=mam1 /DEF=ABC transporter family (PMID 9236781)
1769552_s_at	0.0348177	-0.395908	0.0519288	0.195909	S. pombe SPBC1348.01 /DEF=DUF999
1778976_at	0.291792	2.48407	-1.15129	-0.043155	S. pombe SPAC139.05 /DEF=succinate semialdehyde dehydrogenase (predicted)
1771017_at	0.100663	0.758547	-0.918622	-0.0630871	S. pombe SPCC31H12.02c /DEF=ion channel (predicted)
1769864_at	0.0378199	-0.274698	0.0505327	0.402085	S. pombe SPBC3B8.01c /DEF=electron carrier activity
1778324_at	0.0243813	-0.712007	0.0424522	-0.0116342	S. pombe SPAC1834.04 /GEN=hht1 /DEF=histone H3
1777506_x_at	0.0134179	-0.694963	0.0452299	-0.0291373	S. pombe SPAC1834.04 /GEN=hht1 /DEF=histone H3
1771604_at	0.441917	0.348617	-0.441702	-1.00115	S. pombe SPBC1861.02 /GEN=abp2 /DEF=ARS binding protein (PMID 9488484)
1771036_at	-0.425693	1.37647	-1.40289	-0.0237989	S. pombe SPCC757.03c /DEF=conserved fungal protein
1777875_s_at	-0.558266	-1.29192	0.222765	0.622607	S. pombe SPAC977.03 /DEF=sterol methyltransferase (putative)
1779439_at	-0.365413	1.67568	-0.858406	0.173048	S. pombe SPCC794.04c /DEF=unknown specificity
1773797_s_at	-2.61925	-3.18937	2.93084	3.34107	S. pombe SPBC1711.02 /GEN=matmc /DEF=mating-type m-specific polypeptide mc
1769496_at	-0.0128247	-0.540836	0.185187	0.391964	S. pombe SPAC1A6.11 /DEF=dubious
1772678_at	0.109175	-0.838152	-0.0898638	-0.0273663	S. pombe SPAC977.15 /DEF=dienelactone hydrolase family
1775581_at	0.0459309	0.205104	-0.060744	-0.391955	S. pombe SPCC320.03 /DEF=transcriptional regulator (predicted)
1772987_at	-1.82707	-1.57218	1.70758	1.98157	S. pombe SPAC186.05c /DEF=hypothetical protein
1770422_at	0.328665	1.63448	-1.84294	-0.112835	S. pombe SPBC16E9.16c /DEF=pseudogene
1774638_at	-0.0126394	-0.298672	0.0769819	0.290675	S. pombe SPAC323.04 /DEF=ATPase
1773509_at	0.0759951	3.30002	-1.98092	-0.0750535	S. pombe SPAC4H3.08 /DEF=short chain dehydrogenase (predicted)
1773909_at	-0.0467389	-0.957339	0.590542	0.0845731	S. pombe SPCC1235.14 /GEN=ght5 /DEF=hexose transporter (PMID 10735857)
1778631_at	0.483092	0.430347	-0.246701	-0.379087	S. pombe SPAC13F5.07c /DEF=dubious
1775955_at	-0.772203	-0.773916	1.9243	4.29877	S. pombe SPAC750.01 /DEF=pseudogene
1776005_at	0.278044	-1.49675	-0.0607007	0.130827	S. pombe SPAC27D7.03c /GEN=mei2 /DEF=RNA-binding protein
1777151_at	-0.125541	1.9209	-0.200118	-0.020601	S. pombe SPAPB1A11.02 /DEF=esteraselipase (predicted)
1772040_at	-0.41744	-0.199528	0.319105	0.622978	S. pombe SPBC23G7.11 /DEF=DNA-3-methyladenine glycosidase
1770406_at	0.160953	0.543479	-0.303329	-0.512011	S. pombe SPAC3H1.11 /DEF=zinc finger protein
1769944_at	0.135532	0.897323	-0.267118	-0.284319	S. pombe SPAC186.02c /DEF=2-hydroxyacid dehydrogenase (predicted)
1773764_at	-0.267659	-0.0271168	-0.0233405	0.803316	S. pombe SPCC18B5.02c /DEF=cinnamoyl-coa reductase pseudogene
1772634_at	0.00482559	0.787249	-0.934747	-0.0213197	S. pombe SPCP31B10.06 /DEF=C2 domain
1778411_at	0.326971	0.878234	-1.03696	-0.0329599	S. pombe SPAC22F8.05 /DEF=alpha,alpha-trehalose-phosphate synthase (predicted)
1772818_at	0.96944	2.31146	-0.373684	-0.0605996	S. pombe SPACUNK4.17 /DEF=dehydrogenase (predicted)
1775329_at	0.165632	0.605718	-0.42563	-0.0180566	S. pombe SPAC26F1.10c /GEN=pyp1 /DEF=phosphoprotein phosphatase activity
1769794_at	-0.659968	-0.908626	0.41895	0.689583	S. pombe SPAC186.04c /DEF=putative pseudogene, similar to N-terminal of transmembrane channel
1777398_at	0.802835	1.0052	-0.550089	-0.857606	S. pombe SPAC343.12 /GEN=rds1 /DEF=involved in response to stress
1774679_at	0.0963558	-0.693915	-0.683329	1.25402	S. pombe SPCC330.03c /DEF=cytochrome b5 family
1776548_at	-1.20839	-0.792187	1.03293	2.68405	S. pombe SPBC23G7.10c /DEF=NADH-dependent flavin oxidoreductase (predicted)
1772026_at	1.09868	0.524983	-0.550533	-0.646779	S. pombe SPBC1861.01c /DEF=AT hook protein (inferred from context)
1778628_at	0.464518	0.728372	-0.0446323	-0.424576	S. pombe SPCC1223.03c /GEN=gut2 /DEF=glycerol-3-phosphate dehydrogenase
